# Supplementary material for: POMC-specific modulation of metabolic and immune pathways via melanocortin-3 receptor signaling
Source: Royal Society of Chemistry journal article supplement (doi:10.1039/d4mo00248b), 2025-06-11
Supplement: d4mo00248b2.xlsx [file d4mo00248b2.xlsx]

## Sheet: TPP_list
clustername	temperature	pEC50	hill	maxVal	minVal	max.abs.win	F.statistic	dataset	stab.count	destab.count	cpd_effect	cum.f	max.fc	pEC50opt	rank	is.decoy	decoy.cumsum	fdr	ligand
USO1_HUMAN	37	-33.68082466030471	-5.995979993335753e-6	-1.841963937839099	1.0000942900686776	0.0687054217714274	2038.170931592458	target	0	6	destabilized	22.064515828921827	0.053501660102791886	1.3377000283952425	1	0	0	0	ACTH
K1C19_HUMAN	57	-1.2809735139494058	-1.2110937328235947e-4	-1.4901515579229243	0.9994194294441261	0.2130135159865158	188.231299852308	target	0	5	destabilized	21.89410174641893	0.2130135159865158	3.2263295320976844	2	0	0	0	ACTH
PFD1_HUMAN	37	-0.9874200249341295	-1.3766608161610997e-4	-1.2082788088024854	1.0008361754368147	0.3308246889480136	74.93895673181645	target	0	5	destabilized	16.37255047369707	0.2753791279478986	0.6465191601126676	3	0	0	0	ACTH
RTRAF_HUMAN	67	2.5679538738244374	-5.40039999192497e-4	-1.669927203060824	0.9992249018631999	0.12398608151742577	144.26339258072554	target	0	6	destabilized	15.572641204479968	0.12398608151742577	1.5526592349898276	4	0	0	0	ACTH
HMGB2_HUMAN	57	-83.34547005391565	-0.00966194874156701	-5.7429988785421875	1.0004095570535148	0.2544257796471938	195.0703371126371	target	0	5	destabilized	13.572511895819575	0.21474855321452135	2.987330266835954	5	0	0	0	ACTH
K2C8_HUMAN	57	-13.72993583856059	-2.7957287723195587e-5	-1.5324606216425285	0.9999584917615846	0.17850298225452654	207.0200083324772	target	0	4	destabilized	13.496368415603069	0.17850298225452654	2.488113008755903	6	0	0	0	ACTH
UBR7_HUMAN	57	1.9029260305163336	-6.218366120915928e-4	-1.6367740199285197	1.0033343626096107	0.1260528290272599	46.286590264207256	target	0	4	destabilized	12.85806958417269	0.12289046179803038	2.3492450515327916	7	0	0	0	ACTH
SPRY4_HUMAN	37	0.374764310953603	-2.9086810383927594e-4	-1.535302294599377	1.0009043007706813	0.1810240706787405	111.16583621717795	target	0	3	destabilized	12.161138585049853	0.1810240706787405	0.374764310953603	8	0	0	0	ACTH
LIS1_HUMAN	47	1.2803101580459573	-2.986439612188262e-4	-1.2232537756398254	1.0006423329581735	0.31019579213056875	33.37238045710628	target	0	7	destabilized	11.6836920406488	0.12199564112677368	2.0407417991391164	9	0	0	0	ACTH
TET2_HUMAN	37	-36.93420184083924	-0.012506939870573332	-3.6055916910392973	1.006532008452942	0.11947508930379332	31.510468088314816	target	0	5	destabilized	11.632677350927553	0.11947508930379332	0.8037842881789484	10	0	0	0	ACTH
K2C75_HUMAN	37	-0.7030654652023335	-1.7337382373158714e-4	-1.3819131328480458	1.0003159459883726	0.2420301452456559	33.73028649949879	target	0	5	destabilized	10.727042536083497	0.1239141493068489	2.8436669829092747	11	0	0	0	ACTH
UBP2L_HUMAN	37	-0.2835044847082272	0.011623666459535682	-1.51288743406287	2.513615663125869	1.8127263202558752	26.296668413529385	target	5	0	stabilized	10.666107533262744	3.0307299176482236	3.0553631406016293	12	0	0	0	ACTH
SYDM_HUMAN	47	2.707865761050662	-2.6540807646276095e-4	-1.6701067796895106	1.0016194968372598	0.13220628530552547	456.94811380159524	target	0	4	destabilized	10.633993571597227	0.021420475807354383	1.8989758171909026	13	0	0	0	ACTH
PRPS1_HUMAN	47	-17.23614956480091	1.1059054287731378e-5	-1.6240798809466999	2.6268807496007516	1.9491355190281197	29.88040125789584	target	5	0	stabilized	10.231560154554275	2.4714168385591773	3.0858096931252716	14	0	0	0	ACTH
GSK3A_HUMAN	37	2.207745063454708	4.2726098764412447e-4	-2.032679321125731	3.020076743209952	2.2773778792606567	18.715277159793228	target	6	0	stabilized	9.648194990964221	2.4789293854839043	2.207745063454708	15	0	0	0	ACTH
U5S1_HUMAN	37	-4.0578639155326925	-1.7419526109026953e-4	-1.6550547159065703	1.0025668076010326	0.14171260149081957	134.88037637312175	target	0	3	destabilized	9.639674801030965	0.06930450382600083	2.5675240441527003	16	0	0	0	ACTH
MTREX_HUMAN	42	2.7945019549452743	-7.936640056154032e-4	-1.0047322722234195	0.9796612810446018	0.41128299285744724	26.174008471072195	target	0	4	destabilized	9.044351542120566	0.10775939243747035	2.7945019549452743	17	0	0	0	ACTH
CSK22_HUMAN	37	-20.7786336375297	-3.892893250274083e-5	-1.7136196581667997	0.9649179586998979	0.08281633969548724	163.6893601331734	target	0	4	destabilized	8.909965226755514	0.08281633969548724	3.250084973998727	18	0	0	0	ACTH
SDSL_HUMAN	37	1.3004556273417742	-1.8771913150457058e-5	-1.2254547834248888	0.9859306578142057	0.31170396043625204	16.539256191982528	target	0	4	destabilized	8.82301739856341	0.31170396043625204	1.3004556273417742	19	0	0	0	ACTH
VAT1_HUMAN	37	2.6898848345260102	-5.748346057749003e-4	-1.0225208675865483	0.9994292067651136	0.38749057866383985	21.04531545827006	target	0	7	destabilized	8.292421299232398	0.38749057866383985	2.6898848345260102	20	0	0	0	ACTH
MTND_HUMAN	57	-9.483726862106234	-0.003284390558284228	-1.8038432702152627	1.0012720747597568	0.11483188987795356	138.46906652460765	target	0	2	destabilized	8.06916241646765	0.11483188987795356	-9.483726862106234	21	0	0	0	ACTH
CTRO_HUMAN	57	1.183461162677626	-7.222042767592645e-4	-1.734468496706079	0.9922537475409876	0.07216454863676558	35.33604203045965	target	0	5	destabilized	7.7500228140495215	0.07216454863676558	2.11164068904553	22	0	0	0	ACTH
LUC7L_HUMAN	37	1.030844064486482	-1.0096521066907904e-4	-1.5670341128101333	1.0083925798691726	0.16956399002123212	48.38135750019453	target	0	4	destabilized	7.66867659095665	0.03393145962917301	1.030844064486482	23	0	0	0	ACTH
CNPY3_HUMAN	42	-5.595915695861665	-1.778218053434404e-5	-1.3020546465628955	1.003858418365555	0.2995841594831715	21.8482617006467	target	0	3	destabilized	7.233050655498095	0.14134613298957335	-5.595915695861665	24	0	0	0	ACTH
SERB_HUMAN	42	1.9218198724949138	-2.0444646570311518e-4	-1.2054123007791837	0.9985322815590728	0.31485359240157534	12.73573100065228	target	0	4	destabilized	7.225517099908782	0.31485359240157534	2.0337616658756685	25	0	0	0	ACTH
KIF3C_HUMAN	42	-1.3070361813587914	-2.114016788290406e-4	-1.7164936488307134	1.00129353302513	0.10353518402651292	68.096500795017	target	0	2	destabilized	7.186405904935045	0.10353518402651292	2.0280304552578188	26	0	0	0	ACTH
TBA1C_HUMAN	37	1.3809037563581867	-2.1335923782011244e-4	-1.4113017209368595	1.0018066882694865	0.2169671099354178	79.57771440380637	target	1	3	destabilized	7.133880955421343	0.2169671099354178	1.3809037563581867	27	0	0	0	ACTH
SCG1_HUMAN	37	-5.458726517604899	-1.1001220630274835e-4	-1.90920378272081	1.0222999987625823	0.03856737501429802	47.50074536521973	target	0	4	destabilized	7.0884185241276505	0.03856737501429802	3.007153579038268	28	0	0	0	ACTH
AN32E_HUMAN	67	2.8770146096281466	-2.5939429181668505e-4	-1.0185349893625395	1.007424528423792	0.3219606442863536	7.902884141440233	target	0	5	destabilized	6.932025422017917	0.3219606442863536	2.9716774412533833	29	0	0	0	ACTH
DBNL_HUMAN	57	1.9735047960090835	4.0597635352069785e-4	-4.530867709698298	5.415434177006103	3.9819258684291152	8.837423122440297	target	6	0	stabilized	6.780151381911512	6.817826891290669	1.7950957957599032	30	0	0	0	ACTH
SRSF7_HUMAN	67	1.1745223030707153	-1.9792541374006256e-5	-1.4904644413303345	1.0033944038857194	0.20489479318655246	31.149251474824393	target	0	2	destabilized	6.708019290849046	0.1460697656474269	1.1745223030707153	31	0	0	0	ACTH
SYAP1_HUMAN	42	2.330960989122455	4.3628609499100386e-4	-2.788722198411879	3.791142763142384	2.8012735551920724	7.283760733861182	target	6	0	stabilized	6.6769648103653	4.056294305301418	3.0051698457978873	32	0	0	0	ACTH
CPSF6_HUMAN	47	0.5079605926738333	-2.208822438114439e-4	-1.0072346419714129	1.000687035996621	0.3897412772565123	11.89949446280567	target	0	6	destabilized	6.46077153707447	0.3487067361665208	1.9980467073205341	33	0	0	0	ACTH
ARF5_HUMAN	57	-3.0524481544802593	4.325885806043066e-5	-1.212072839165178	2.213215974754605	1.867164773787215	6.389410203445843	target	6	0	stabilized	6.416142280694882	3.9823216629135607	2.95161072127148	34	0	0	0	ACTH
HEXI1_HUMAN	47	-7.537846472184129	4.1535355587530274e-5	-2.3121721434296107	3.3215522076530153	2.46230600398809	17.9403144942784	target	4	0	stabilized	6.266852100923425	2.46230600398809	3.1293859229676304	35	0	0	0	ACTH
A20A4_HUMAN	42	1.0382041699836917	-0.006219060179462335	-1.6837850358795967	1.0001212036244362	0.0740140094208417	37.18962056910156	target	1	3	destabilized	6.21572303633161	0.0740140094208417	1.0382041699836917	36	0	0	0	ACTH
CROCC_HUMAN	47	1.0502844641369256	0.041814757386178535	-1.5103154517923725	2.510424860357025	1.8016520800674367	7.106055899229501	target	4	0	stabilized	6.130710711869451	2.669564327980366	0.876062125666575	37	0	0	0	ACTH
SNUT2_HUMAN	37	2.694686384104381	4.7122981157930944e-4	-3.31704402157124	4.568034486554479	3.594452093322637	10.045296360124391	target	4	0	stabilized	6.10241818851856	3.594452093322637	2.694686384104381	38	0	0	0	ACTH
COPD_HUMAN	47	2.4234490641573956	4.670618823072849e-4	-0.7966034746768165	1.7961348458474804	1.5020086510447332	9.429839754669628	target	5	0	stabilized	6.0877257237377815	3.08745710485545	2.9355060817593697	39	0	0	0	ACTH
WNK2_HUMAN	37	-6.241259459877557	-0.01179894308337859	-2.157898922881749	1.0000798409072011	0.030839974103456822	103.96081174524569	target	0	3	destabilized	6.048974675344692	0.030839974103456822	0.4225751520754114	40	0	0	0	ACTH
TBC8B_HUMAN	57	-10.5140487186374	-5.664270623410857e-5	-1.7149782994731124	1.006033675199867	0.08725431349896882	31.947341540323443	target	0	2	destabilized	5.735462816448366	0.08725431349896882	1.537387000424571	41	0	0	0	ACTH
LYAG_HUMAN	52	-21.046882987565564	-1.7862680469659203e-5	-0.8243163075654151	1.00578689058426	0.4838064864022305	4.690727803358478	target	0	4	destabilized	5.72623904891937	0.3431394533628996	1.7136075518845217	42	0	0	0	ACTH
NUP62_HUMAN	42	-6.699510763380716	-8.142182161395004e-5	-1.4290759711680203	1.0002781039251507	0.172915388639829	53.849392391647434	target	0	3	destabilized	5.717213969638713	0.12208333155274374	0.7237843735364885	43	0	0	0	ACTH
SYSC_HUMAN	57	-1.5761035887922579	0.05902035300242927	-4.160757255600724	5.16098956916855	2.567034033112867	24.271872685204723	target	2	0	stabilized	5.688982038578871	4.597636666184263	2.0856927600288593	44	0	0	0	ACTH
ODO2_HUMAN	37	-2.247555753179417	-1.8690384725540514e-4	-1.260411906274388	0.9812432347755529	0.32852030896058815	211.30068934332363	target	0	2	destabilized	5.61450334193901	0.32852030896058815	-2.247555753179417	45	0	0	0	ACTH
PLBL2_HUMAN	37	1.3532493534521652	-3.017737223381811e-4	-1.3383618874727143	0.999162776038345	0.2334997424516792	37.70088714460751	target	0	3	destabilized	5.562975595693295	0.2334997424516792	1.3532493534521652	46	0	0	0	ACTH
HS902_HUMAN	47	0.055366913424282474	-2.6286005741998946e-4	-1.4830426181459326	1.0492902698639015	0.21562322795332933	11.359704592077984	target	2	3	destabilized	5.492818592545412	0.21562322795332933	2.44361524654695	47	0	0	0	ACTH
DFFA_HUMAN	37	2.534532943859615	-7.993268187187872e-4	-0.9157398752156325	1.0005696987137929	0.45350834825692926	13.568497429653249	target	0	5	destabilized	5.4577241447414675	0.37043701684875713	2.534532943859615	48	0	0	0	ACTH
SYCM_HUMAN	57	-14.189309539954198	-2.8659378714560764e-5	-1.521535271583407	1.0023719028011897	0.20082178307188045	69.41869891438041	target	2	3	destabilized	5.3517421294052046	0.20082178307188045	2.78333273535916	49	0	0	0	ACTH
WDR12_HUMAN	37	-0.4928595350531366	-1.6390861330872904e-4	-0.8634536255621952	1.0000813036329217	0.5350236000618693	86.17445209273599	target	0	2	destabilized	5.2585717295091605	0.3030424591631671	1.2950607003415477	50	0	0	0	ACTH
1433S_HUMAN	57	-0.5898360407327498	-0.0426234890432131	-1.3211990644765292	1.0041348951502893	0.38674085883636683	9.949540205768534	target	0	4	destabilized	5.246764063733476	0.30867598091649373	0.49853437772032194	51	0	0	0	ACTH
CSN1_HUMAN	37	2.84963596563342	7.199578573220705e-4	-2.8819739395394155	3.8536902517073486	2.8465357211353477	7.236143788462912	target	4	0	stabilized	5.222903737232986	2.8465357211353477	2.84963596563342	52	0	0	0	ACTH
MP2K1_HUMAN	42	1.5509343628796142	2.2382468764261076e-4	-2.7724516168140982	3.753343138653395	2.571974149451561	24.11929666833895	target	2	0	stabilized	5.216055858689226	2.571974149451561	1.5509343628796142	53	0	0	0	ACTH
DHX15_HUMAN	37	2.3564064870141066	2.200500176149841e-4	-6.434171810960893	7.427974551452603	5.5526671958091605	9.019473026662393	target	3	0	stabilized	5.2076155525164225	5.5526671958091605	2.3564064870141066	54	0	0	0	ACTH
UFD1_HUMAN	37	-12.189801770956915	0.001579697639964392	-1.0423019448636248	2.0428448556832515	1.5867407767702986	14.484724401339086	target	5	0	stabilized	5.12052813294716	2.2559674854389593	2.9643199937283704	55	0	0	0	ACTH
NUP50_HUMAN	37	-31.635674220366806	0.01602171110159095	-5.316145952650462	6.316555083613103	2.2611765509080284	28.597676734244097	target	3	0	stabilized	5.047019030272659	2.435616032676535	3.2267934227456	56	0	0	0	ACTH
DOC11_HUMAN	37	2.4907071686166313	-1.344341860800439e-4	-1.2723026966088842	0.973910015691393	0.2047152908703202	20.967137679106326	target	0	3	destabilized	4.9814691515928855	0.2047152908703202	2.4907071686166313	57	0	0	0	ACTH
SSBP_HUMAN	37	0.8827083903516408	-7.079377933577972e-5	-1.4938023512039007	1.0503025572369589	0.2663754437791407	48.713212769064356	target	0	4	destabilized	4.97672697611335	0.2663754437791407	0.8827083903516408	58	0	0	0	ACTH
EF1A1_HUMAN	37	0.30824981144749136	6.672878599534439e-5	-2.9664953747619585	3.9352724796644267	2.8483877347477398	12.594715672896474	target	3	0	stabilized	4.974873918081535	2.8483877347477398	0.30824981144749136	59	0	0	0	ACTH
CPVL_HUMAN	37	-1.2577285529595819	-1.904192018166592e-4	-1.267189433726942	1.0008233588537	0.20155809786507062	9.488769015601802	target	0	6	destabilized	4.91735441790749	0.20155809786507062	2.92351984408846	60	0	0	0	ACTH
PYGM_HUMAN	57	2.858865145975093	4.762409610126004e-4	-3.0241100797463276	4.052742550034572	2.9675212646148195	7.740574125145503	target	4	0	stabilized	4.911108594188789	3.431481355424714	1.0260555381905618	61	0	0	0	ACTH
ACON_HUMAN	42	-0.22719560153839413	-1.9445494670062072e-4	-1.1434174296156772	1.0058973590247968	0.3517796407648439	22.507264294292003	target	0	2	destabilized	4.8525815232178005	0.17610513794265834	-0.22719560153839413	62	0	0	0	ACTH
AIFM1_HUMAN	57	-1.038424125961722	8.259595743178222e-5	-1.174856934888123	2.1643129478620646	1.6769411121028455	12.307197379756698	target	5	1	stabilized	4.842991829665008	3.3240102586064757	2.194798640103579	63	0	0	0	ACTH
FAAA_HUMAN	37	1.4943134286337425	-2.4716553708284975e-4	-1.3429322565512563	0.9987072417611762	0.24014706193200477	25.813574575535373	target	0	2	destabilized	4.8227931095792	0.24014706193200477	1.4943134286337425	64	0	0	0	ACTH
AN32A_HUMAN	42	0.18397872519691072	-0.07779700751952479	-1.0121232704934202	1.001103993707719	0.54352990417809	4.72861375242645	target	0	4	destabilized	4.790304399701128	0.3583297794166573	1.2185753888681028	65	0	0	0	ACTH
PKN1_HUMAN	37	-13.25784683976702	-0.02258469414391142	-2.812724660005165	1.0009458995138467	0.11348736489737506	57.21757986456388	target	0	4	destabilized	4.738420656183567	0.11348736489737506	3.163988137250051	66	0	0	0	ACTH
IPYR_HUMAN	37	0.5663252876453329	2.484213988326835e-4	-1.5175691969901672	2.517445902821255	1.9195782915343274	11.274598121096565	target	3	1	stabilized	4.6256661901822715	1.9195782915343274	0.5663252876453329	67	0	0	0	ACTH
AL7A1_HUMAN	37	2.880005370647463	3.766370377024205e-4	-2.73375614929929	3.73019870085209	2.5509887637046003	13.352760086288365	target	2	1	stabilized	4.623194164766458	2.5509887637046003	2.880005370647463	68	0	0	0	ACTH
CHRD1_HUMAN	52	1.857417141718385	3.613455856201745e-4	-1.5624029373017874	2.5289001446972352	1.947940436443852	4.8997865442203015	target	5	0	stabilized	4.568027396791661	4.68964395099021	1.5078300639145295	69	0	0	0	ACTH
UCHL3_HUMAN	52	-1.42299526696468	-0.042623182097085995	-1.114515335359187	1.0054593449089886	0.5207109470027391	4.44157678652122	target	0	5	destabilized	4.559202274351509	0.40335427807703167	0.21495092723272527	70	0	0	0	ACTH
MK01_HUMAN	37	2.092902624610023	4.920361711837535e-4	-1.6883185787476127	2.6866820150631616	2.048667791513482	10.960714032278261	target	2	0	stabilized	4.533996930412918	2.048667791513482	2.092902624610023	71	0	0	0	ACTH
DIXC1_HUMAN	37	-4.168813766295312	-1.1468697639881359e-4	-1.7190087446708844	1.003970583703046	0.083076339033314	90.12658977683796	target	0	1	destabilized	4.5012152351370585	0.083076339033314	-4.168813766295312	72	0	0	0	ACTH
RL11_HUMAN	37	2.6668573516240563	5.904801412532927e-4	-3.4975665405981893	4.518072511846085	3.0768518592923333	19.411613387967105	target	4	0	stabilized	4.4921729491664815	3.0768518592923333	2.6668573516240563	73	0	0	0	ACTH
RNT2_HUMAN	37	3.0362460515128973	-5.020159576828345e-4	-1.6092461519759493	0.9675153210543641	0.12574781144492825	50.6760360413531	target	0	3	destabilized	4.455757579779464	0.12574781144492825	3.0362460515128973	74	0	0	0	ACTH
AL9A1_HUMAN	42	1.6002963607439327	-4.226293364177546e-4	-0.6225475384315772	1.0022701498311217	0.6403852863773811	11.149783945885295	target	0	2	destabilized	4.400341451180143	0.6403852863773811	1.6002963607439327	75	0	0	0	ACTH
ERF1_HUMAN	52	-0.05267708753422088	1.662383829875036e-5	-1.6003131011677085	2.5825546955435956	2.0207179940337294	6.061012958696697	target	3	0	stabilized	4.393975530733376	2.0207179940337294	3.2918989916579706	76	0	0	0	ACTH
6PGD_HUMAN	37	4.0313392003026856	1.4592721615532851e-4	-3.954925286937405	4.958865091518722	3.2380534681248627	56.11533878786382	target	2	1	stabilized	4.355090782937918	3.2380534681248627	4.0313392003026856	77	0	0	0	ACTH
OSGEP_HUMAN	57	0.42852349482397234	0.05056741962562271	-4.640742456531436	5.645407193174039	3.361585803297006	8.424931475487806	target	4	0	stabilized	4.306278040220155	3.361585803297006	3.3734987532390375	78	0	0	0	ACTH
RSSA_HUMAN	37	2.147324122843298	3.6129006038101107e-4	-3.3353869162466134	4.41352198128822	2.981129171218578	46.59639042835976	target	2	1	stabilized	4.266922925607844	2.981129171218578	2.147324122843298	79	0	0	0	ACTH
CCD91_HUMAN	37	2.5107296484630095	-3.657111883836301e-4	-1.4454342611286424	1.001676956892579	0.2185743665263041	66.3483228952374	target	0	2	destabilized	4.1949184838233	0.2185743665263041	2.5107296484630095	80	0	0	0	ACTH
NUCB1_HUMAN	67	-3.4075142293713956	4.334982037415851e-6	-1.4062944905943666	2.4066939819702995	1.8920752749277767	6.821555552040217	target	5	0	stabilized	4.1837716871119905	3.584751255079424	3.336788151179553	81	0	0	0	ACTH
6PGL_HUMAN	37	2.5645581101030364	-5.336892216253207e-4	-0.7360963253280552	1.0006845982477148	0.5790860613935487	30.920390214948466	target	1	2	destabilized	4.131795094910813	0.3011189209181306	2.5645581101030364	82	0	0	0	ACTH
UFC1_HUMAN	57	-2.776244212533443	1.498399916288935e-4	-2.8847625728437136	3.8903019779481336	2.797824399466357	16.859855220429232	target	4	0	stabilized	4.127256199769737	2.797824399466357	1.6021586835777906	83	0	0	0	ACTH
NOLC1_HUMAN	47	1.5032563248285067	3.187712147239999e-4	-2.735185754863727	3.7682254203656043	2.851967848901133	4.938843968862218	target	3	0	stabilized	4.086069356985261	3.0939705587805557	2.993168047607726	84	0	0	0	ACTH
SDHA_HUMAN	47	-2.512334305275259	9.839942108077954e-5	-2.301437915693176	3.3240907431401707	2.4422288713851574	7.452805581075406	target	3	0	stabilized	4.061271207550954	2.4422288713851574	3.208641020431893	85	0	0	0	ACTH
PSA2_HUMAN	67	3.183617122847221	7.290338210586113e-4	-1.6290801285206025	2.623758369227206	2.1388538345255066	4.0943394397052275	target	4	0	stabilized	4.046385426720568	2.1388538345255066	2.368861587775626	86	0	0	0	ACTH
GDIR1_HUMAN	37	2.860983598877119	1.2615407593147152e-4	-1.6305489100033248	2.6317298048963598	2.0001019395009436	15.298195382929263	target	3	1	stabilized	4.03251233603111	2.0001019395009436	2.860983598877119	87	0	0	0	ACTH
GSHB_HUMAN	37	-8.933719412648166	-4.8755771302239745e-5	-0.8083749187071636	1.0010898757804552	0.5493507240969953	51.60700780124571	target	0	1	destabilized	3.943657473367821	0.5493507240969953	-8.933719412648166	88	0	0	0	ACTH
ECHD1_HUMAN	37	-11.212235781966836	-5.581260836511037e-5	-1.7467484164972924	1.0048084879221963	0.1208173203902704	51.359070465688404	target	0	2	destabilized	3.938841560808434	0.08348193270497271	3.705948350808861	89	0	0	0	ACTH
IDH3B_HUMAN	37	2.5148899084688225	5.221006374588189e-4	-4.156313970300539	5.22989143471194	3.8540651743996572	12.504510816370258	target	2	0	stabilized	3.902760826544448	3.8540651743996572	2.5148899084688225	90	0	0	0	ACTH
ANXA2_HUMAN	37	1.7787427867626528	8.981947870551584e-5	-4.023443396445339	5.018253465238026	3.4340466972957695	11.879868684179337	target	2	0	stabilized	3.894728364183665	3.4340466972957695	1.7787427867626528	91	0	0	0	ACTH
LAMB1_HUMAN	37	0.20542237108536937	-3.0171106190135512e-6	-1.7801552815092168	1.0172082521665107	0.08381858252094829	13.0243920373967	target	0	3	destabilized	3.877361404986352	0.08381858252094829	0.20542237108536937	92	0	0	0	ACTH
OCRL_HUMAN	52	-4.294594009097125	4.898874293868759e-5	-5.045558108732632	6.091663869340974	4.59939657981316	5.340345511222906	target	4	0	stabilized	3.847489253678143	4.59939657981316	2.042716679637331	93	0	0	0	ACTH
TES_HUMAN	37	2.8737772364717227	3.7696849596888986e-4	-2.9607624013961256	3.9625994604489736	2.6835564251351913	28.7747219573379	target	2	0	stabilized	3.822293659060316	2.6835564251351913	2.8737772364717227	94	0	0	0	ACTH
GSK3B_HUMAN	52	-1.8353416088348442	-5.8992333743970394e-5	-1.3686809053477649	1.0055285349743157	0.23028017667096787	19.173011291488717	target	0	4	destabilized	3.8171168348012157	0.23028017667096787	2.8704987793966747	95	0	0	0	ACTH
IF4G1_HUMAN	37	2.220862755567765	2.666489542520201e-4	-4.999653660334522	6.088729623559126	4.533836388052854	12.166499348284342	target	5	0	stabilized	3.771446887676115	4.533836388052854	2.220862755567765	96	0	0	0	ACTH
ATPA_HUMAN	37	2.4790147997379264	-3.3390297681964076e-4	-1.2022731262691335	0.9847424685587827	0.2994647202512063	18.56004763493986	target	0	3	destabilized	3.757358782832717	0.2744723859161433	2.4790147997379264	97	0	0	0	ACTH
BAG6_HUMAN	42	0.25811007112431256	9.61533257762121e-5	-1.9980498517750764	2.997272295569733	2.3960852125543526	4.526429243299794	target	5	0	stabilized	3.7550603616612044	3.3569030571652294	0.25811007112431256	98	0	0	0	ACTH
RS2_HUMAN	37	2.764472857470522	5.890422568797874e-4	-2.8578513586461667	4.058867338923169	3.1223106820194046	8.311615628074929	target	3	0	stabilized	3.734211840759359	3.1223106820194046	2.764472857470522	99	0	0	0	ACTH
TNPO3_HUMAN	52	-1.1734860163984029	0.00703050745246693	-1.0184240990909434	2.019849480076504	1.568282786046881	12.429447897251872	target	4	0	stabilized	3.714220409193217	1.7023503585194515	3.126632045106343	100	0	0	0	ACTH
PLD3_HUMAN	52	0.8482282275535296	1.0728376284500375e-4	-0.9430847306401237	1.940650874514172	1.5710719612683197	9.152711465237854	target	2	0	stabilized	3.7053632103801455	2.5098868228911013	0.8482282275535296	101	0	0	0	ACTH
GON7_HUMAN	37	1.18074367428501	-2.9587263025405714e-4	-1.6241058242393047	1.0074340676455396	0.10839231625115094	40.46928131528568	target	0	1	destabilized	3.700543200274091	0.10839231625115094	1.18074367428501	102	0	0	0	ACTH
IDH3A_HUMAN	37	2.689984298386372	2.8470822393990996e-4	-1.9490787322185243	2.9539812819575295	2.245883996496871	6.448389872981534	target	3	0	stabilized	3.6940724870763626	2.245883996496871	2.689984298386372	103	0	0	0	ACTH
NAA16_HUMAN	57	-0.9688531985214679	-0.021460349083059316	-1.1793458129606997	1.004425122490497	0.41886607105809004	13.371313111498143	target	0	2	destabilized	3.6748035408081714	0.3884153728507947	0.8651947753307855	104	0	0	0	ACTH
BAG3_HUMAN	57	1.5171889006773547	0.00378486147604702	-2.6943647297509887	3.695359242487353	2.5867730003773284	13.564409337300638	target	6	0	stabilized	3.6686288804382805	3.583541740879469	3.1341956448425696	105	0	0	0	ACTH
ACO13_HUMAN	52	2.3159364016477184	-3.6460117505043784e-4	-0.7488980267000211	1.000678672221133	0.5493131414221379	9.946373762779224	target	0	3	destabilized	3.6481257505252014	0.508395944198534	0.9810071161346821	106	0	0	0	ACTH
TMC5A_HUMAN	52	2.0882546598393565	-3.569814645010093e-4	-1.7624962370205255	1.0053175812418444	0.07107070341232391	38.13668528504943	target	0	1	destabilized	3.641176687246252	0.07107070341232391	2.0882546598393565	107	0	0	0	ACTH
DREB_HUMAN	57	-0.4990920714480765	-8.336262733020412e-5	-0.7683508958803167	0.9931677350831912	0.5238284688588393	4.021917320870444	target	0	3	destabilized	3.637638978189943	0.5198027896444742	2.839859508300676	108	0	0	0	ACTH
AIMP1_HUMAN	37	-3.97670181643614	1.132716674504041e-4	-2.113279529207708	3.114581556477546	2.282706120057774	12.925062840946486	target	2	0	stabilized	3.6355378701219383	2.282706120057774	-3.97670181643614	109	0	0	0	ACTH
VIME_HUMAN	37	2.322285857708599	-9.385696034962233e-4	-1.4771613098596967	1.0076732195765044	0.1918443858356084	36.82678549505755	target	0	4	destabilized	3.606225447121898	0.1918443858356084	2.322285857708599	110	0	0	0	ACTH
CRK_HUMAN	37	2.671271967325661	7.001507690020136e-4	-2.0517911857607647	3.0551869401260934	2.286822264866473	8.817459133784746	target	2	0	stabilized	3.6030420547525837	2.286822264866473	2.671271967325661	111	0	0	0	ACTH
ZYX_HUMAN	52	0.31448607171167886	7.259961516175464e-5	-2.3735529785708236	3.372012016471581	2.6816711556941693	5.864854250748105	target	3	0	stabilized	3.5108795793864878	4.503266527893573	3.162181825943148	112	0	0	0	ACTH
CAZA2_HUMAN	47	-1.7370756622566599	1.4883484102866122e-4	-1.8615806506612222	2.84756239240794	2.19315159381742	11.528453508506553	target	2	1	stabilized	3.4774259533917755	2.19315159381742	3.1187854843870424	113	0	0	0	ACTH
GNPI1_HUMAN	42	-5.726308304947268	-5.992105224616942e-5	-0.49547783385930577	1.0003317975222694	0.6502180078642764	6.111344665065714	target	0	2	destabilized	3.4758377687431943	0.5809122990204328	0.6597955219017136	114	0	0	0	ACTH
EIF3L_HUMAN	37	2.868835855821472	1.7593464238315978e-4	-2.6271897551194066	3.63052985506487	2.8848603049742874	3.580857170668637	target	3	0	stabilized	3.4664587314849538	2.8848603049742874	2.868835855821472	115	0	0	0	ACTH
BORC6_HUMAN	37	-0.7530676037124266	-1.7565446200984474e-4	-1.2849101197347914	1.000249554767402	0.24140437158915076	31.977765835284277	target	1	2	destabilized	3.4650408436547075	0.24140437158915076	-0.7530676037124266	116	0	0	0	ACTH
DEFI6_HUMAN	52	-0.9806644065527064	1.505590056885719e-4	-2.5380083613863658	3.5415859084599988	2.647695649931416	9.52237617170162	target	2	0	stabilized	3.4543379464796153	2.747010539858442	1.5353889833064862	117	0	0	0	ACTH
BAX_HUMAN	57	2.317640150846325	-4.631627774462111e-4	-0.91043940855482	1.0007927749413734	0.4467380732696712	6.194963596010815	target	0	2	destabilized	3.4237712818865242	0.3858904110174336	2.317640150846325	120	0	2	0.03333333333333333	ACTH
ENAH_HUMAN	47	1.7504003000166273	6.248334600099744e-4	-1.9151260303718052	2.9170944708623208	2.140561910377865	10.155068821637778	target	2	0	stabilized	3.4233011672919496	3.1992606686685536	1.7504003000166273	121	0	2	0.03305785123966942	ACTH
ERO1B_HUMAN	57	0.38391560119096235	-1.309111646044877e-4	-1.2401440031261857	1.0018522762444488	0.3181285519679825	29.799223835023717	target	0	1	destabilized	3.3944823473675876	0.3181285519679825	0.38391560119096235	123	0	3	0.04878048780487805	ACTH
UBE2N_HUMAN	37	1.9718550941479314	3.9776543463977844e-4	-4.157220391990472	5.142011126536307	3.4869084308400575	12.691163381242625	target	5	0	stabilized	3.391022300025854	3.4869084308400575	1.9718550941479314	124	0	3	0.04838709677419355	ACTH
E41L1_HUMAN	37	0.02720978868246166	-4.426986275702687e-5	-1.578922194310958	0.9949297180918291	0.0758496494075733	13.094078811428174	target	0	4	destabilized	3.3697488423965476	0.0758496494075733	0.02720978868246166	125	0	3	0.048	ACTH
SRSF2_HUMAN	67	3.12938729705605	-3.651680066408645e-4	-1.16689494868104	1.0064148614813426	0.34838060180526276	28.774043281395684	target	0	1	destabilized	3.359473705797893	0.34838060180526276	3.12938729705605	126	0	3	0.047619047619047616	ACTH
VATE1_HUMAN	37	2.7551835317951516	3.6982832174817915e-4	-4.63523157118134	5.636417812627171	4.5077649016159675	6.371691030951545	target	2	0	stabilized	3.3250865001661314	4.5077649016159675	2.7551835317951516	127	0	3	0.047244094488188976	ACTH
PRDX5_HUMAN	37	2.0834266943236157	-1.6110964477028877e-4	-1.2391214034083256	0.9876173740648801	0.23478809141842916	26.805093782988298	target	0	2	destabilized	3.288591935985871	0.23478809141842916	2.0834266943236157	130	0	5	0.07692307692307693	ACTH
SF01_HUMAN	57	-3.060844450210167	8.473440324889885e-6	-1.220012901165	2.22632493392085	1.8115304832333015	7.536264274600349	target	4	0	stabilized	3.2854836785536303	1.8115304832333015	1.5863454377439954	131	0	5	0.07633587786259542	ACTH
CSTF2_HUMAN	47	-132.7043907760544	-0.0041901158693505745	-2.853246904906003	1.0000714593789284	0.2605173043314466	17.99111424018702	target	0	2	destabilized	3.2727234587599234	0.2605173043314466	2.931535840029676	132	0	5	0.07575757575757576	ACTH
VTA1_HUMAN	37	2.3424640186399586	1.0778903469503318e-4	-1.5779567498796396	2.5794554068980204	1.9131228638565247	9.63379898064127	target	3	0	stabilized	3.2610645244066494	2.24223401249292	2.3424640186399586	133	0	5	0.07518796992481203	ACTH
PRCC_HUMAN	57	2.966575083468191	8.751271584652045e-4	-2.114663135453078	3.0924342211992872	2.4657813155970385	4.545353245526331	target	6	0	stabilized	3.26035435041422	2.496882123847066	1.6580793326549748	134	0	5	0.07462686567164178	ACTH
RBM12_HUMAN	37	2.5282319947212373	5.613590165233894e-4	-2.1487728269242092	3.1362061988102568	2.294622778523409	25.855819426541625	target	1	0	stabilized	3.252535698501706	2.294622778523409	2.5282319947212373	135	0	5	0.07407407407407407	ACTH
ARL8B_HUMAN	47	-1.5221426666248081	-1.2117269735498764e-4	-1.3219104127709602	1.0314289210245309	0.20905733673830884	5.15733915235011	target	1	3	destabilized	3.242218123388625	0.1862849089236143	3.0096300290717983	136	0	5	0.07352941176470588	ACTH
F10A5_HUMAN	47	2.417164681441165	-5.437116131233103e-4	-1.1483842995254994	1.0450067835425252	0.4178739248634138	13.900395862082773	target	1	4	destabilized	3.224491416732021	0.2585966284119909	2.2174111523460742	137	0	5	0.072992700729927	ACTH
ACTN1_HUMAN	37	-11.916151093296927	-2.4508201641243917e-5	-0.8881419233699477	1.001860243550423	0.42981284543922404	10.66166111922298	target	1	3	destabilized	3.1859981698445576	0.398020738144598	0.6894303644195684	139	0	6	0.08633093525179857	ACTH
DCUP_HUMAN	42	1.228487972198534	4.8646799159891943e-4	-1.4990046060206954	2.5016053282306054	1.9057981106769268	10.24090459869842	target	3	1	stabilized	3.1825953440429315	2.2735565771273003	1.228487972198534	140	0	6	0.08571428571428572	ACTH
WNK3_HUMAN	37	0.9454981964907406	-1.6431269507982557e-4	-1.189769587022987	1.0112409770792306	0.31903643234567525	24.013019988415977	target	0	1	destabilized	3.1785961827656135	0.31903643234567525	0.9454981964907406	141	0	6	0.0851063829787234	ACTH
CLH2_HUMAN	57	3.1296595433123673	-4.375129707426258e-4	-1.3920776607429954	1.0049133015615743	0.0851095341640683	5.100746251046948	target	0	2	destabilized	3.173488751057401	0.0851095341640683	1.671819758786928	142	0	6	0.08450704225352113	ACTH
DDX21_HUMAN	37	1.9779626332598752	4.70592528514042e-4	-1.722112077401839	2.725543434077528	2.0693976373611647	7.142566249968249	target	3	0	stabilized	3.171007342374267	7.075731032014513	1.9779626332598752	143	0	6	0.08391608391608392	ACTH
REPS1_HUMAN	57	2.6959036167481885	5.748882393834233e-4	-2.6696768638038213	3.6743333327658294	2.543151086236023	23.679816157369064	target	1	0	stabilized	3.1646230463610507	2.543151086236023	2.6959036167481885	144	0	6	0.08333333333333333	ACTH
CATZ_HUMAN	37	0.08783490284677821	-2.1072713689132671e-4	-1.3839742067473	1.013821091935641	0.1968913137814914	6.796813377335057	target	0	4	destabilized	3.1536625960947404	0.1968913137814914	0.08783490284677821	146	0	7	0.0958904109589041	ACTH
RL17_HUMAN	37	2.6669890397465146	4.97683739885144e-4	-4.226870753947158	5.3066048075250345	3.978669532059883	7.621342965282437	target	3	0	stabilized	3.115332103789628	3.978669532059883	2.6669890397465146	147	0	7	0.09523809523809523	ACTH
TBCB_HUMAN	37	2.7774355611767554	4.090388451056434e-4	-3.1915470039215323	4.193257878628548	2.9414091633381334	9.813314282490841	target	2	1	stabilized	3.1094851710738194	2.9414091633381334	2.7774355611767554	148	0	7	0.0945945945945946	ACTH
3HIDH_HUMAN	37	1.4925765239823123	-2.521582127139881e-4	-1.0909441235158686	1.024239578070202	0.4371845212578127	22.304656394142576	target	0	2	destabilized	3.104795463581167	0.4371845212578127	1.4925765239823123	149	0	7	0.09395973154362416	ACTH
DCTN4_HUMAN	57	-0.8692849283582667	2.466856489197886e-4	-1.004306545934079	2.0145630051704804	1.628852926271258	4.283574503062633	target	4	0	stabilized	3.075396612722611	2.119963922456968	3.135441914974718	151	0	8	0.10596026490066225	ACTH
MMP10_HUMAN	37	1.7996221931621321	-1.5558428408722413e-4	-1.3366844918246787	1.0079294900262281	0.2516034700492933	21.55922182333389	target	2	3	destabilized	3.0708036518520196	0.23228583652178392	1.7996221931621321	152	0	8	0.10526315789473684	ACTH
FA47A_HUMAN	57	3.581142510714883	-0.0011147551662658915	-0.9588293826756952	0.9349081750110758	0.26694913541669046	3.0704761976092394	target	0	5	destabilized	3.0686387784538094	0.11594599940058381	2.7190923783945613	153	0	8	0.10457516339869281	ACTH
UBA1_HUMAN	37	3.6358538761306507	5.669243605683758e-4	-4.712257799719938	5.712745635907675	3.9574098061057064	20.960386314385463	target	2	0	stabilized	3.042634290312833	3.9574098061057064	3.6358538761306507	154	0	8	0.1038961038961039	ACTH
DX39B_HUMAN	67	0.0928974763684451	-1.5151998486395943e-4	-1.5476646683135462	1.0018206431960728	0.13251591390850354	20.839605915612932	target	1	2	destabilized	3.0368553067069906	0.13251591390850354	3.315334012175247	155	0	8	0.1032258064516129	ACTH
HS905_HUMAN	42	3.00880898526168	0.0010434842258049257	-1.4025297209794618	2.436122057653226	1.9428654156406917	9.702602856758276	target	3	0	stabilized	3.0348426253537215	2.608915404132642	3.00880898526168	156	0	8	0.10256410256410256	ACTH
F169A_HUMAN	47	3.9749712745858465	-0.0012271177328055949	-0.9087046990470758	0.9902662926269576	0.37128096307376135	4.3150463195400075	target	0	3	destabilized	3.0284981708819654	0.36367977920019956	3.121589718132567	157	0	8	0.10191082802547771	ACTH
PTBP1_HUMAN	57	-2.667741893797162	-3.423410627600511e-5	-0.9370474365770215	1.0038437649544412	0.5020431615978784	20.258165615623536	target	0	1	destabilized	3.0085579525507424	0.5020431615978784	-2.667741893797162	159	0	9	0.11320754716981132	ACTH
YBOX2_HUMAN	47	1.5325679688041618	-4.471199678637561e-4	-0.8223701394264107	0.9711387703896897	0.5284194911884871	20.138523856634094	target	0	1	destabilized	3.0026345904947433	0.5284194911884871	1.5325679688041618	160	0	9	0.1125	ACTH
TRM6_HUMAN	47	2.8968144034824936	0.0011263774197207105	-1.3914067556379826	2.4153145125374538	1.9159516978775097	3.5467165122193407	target	4	0	stabilized	2.984883756805062	2.5919434278807745	1.5927078263780976	162	0	10	0.12345679012345678	ACTH
TCPD_HUMAN	37	3.1826370532278863	0.001045026137818625	-1.0057691471521126	2.0279072814751675	1.6900691441581537	4.546714828816537	target	3	1	stabilized	2.9795141305643087	2.5903402830481106	3.1826370532278863	163	0	10	0.12269938650306748	ACTH
AGFG1_HUMAN	47	-17.999025448610244	0.01191445337273113	-4.547717657829433	5.543803298929622	3.063408988415902	19.41590935214663	target	2	0	stabilized	2.9660927996941306	3.1325897867772783	-17.999025448610244	164	0	10	0.12195121951219512	ACTH
K1C27_HUMAN	67	2.487832609306811	-4.96790301988647e-4	-0.827729059360674	1.00134149717053	0.4917508253295808	19.362151064424886	target	0	1	destabilized	2.963320184375949	0.4917508253295808	2.487832609306811	165	0	10	0.12121212121212122	ACTH
PSB5_HUMAN	57	2.9265096234658836	1.9091606355560318e-4	-1.504717095070625	2.4978640267850047	2.0555517556448613	5.047615150728086	target	5	0	stabilized	2.9614949449299353	2.0555517556448613	2.9674324830198118	166	0	10	0.12048192771084337	ACTH
RUXF_HUMAN	57	1.815146655614773	5.274140195061809e-5	-1.5713619882195065	2.582561486229313	1.921567856878338	7.9091167229553605	target	5	0	stabilized	2.9563680250754545	1.921567856878338	4.0761599470921714	167	0	10	0.11976047904191617	ACTH
PTER_HUMAN	37	-7.173081519890793	-3.635916539178896e-5	-1.2334581842212378	1.0043329830937429	0.29454755667488086	18.467087060773775	target	0	1	destabilized	2.91599006984986	0.29454755667488086	-7.173081519890793	168	0	10	0.11904761904761904	ACTH
MEP50_HUMAN	57	2.4678083051330755	5.331924046637368e-4	-1.907500518252602	2.91591821456531	2.1066459434068916	18.00303024809684	target	2	0	stabilized	2.8905400908438703	2.1066459434068916	2.8867638508234545	170	0	11	0.12941176470588237	ACTH
RS18_HUMAN	57	-1.67688985912864	6.752692793427405e-5	-3.1465895077944195	4.157946876014303	3.110316681416779	6.201709296965308	target	4	0	stabilized	2.8853533117930996	4.783442178431517	1.515528164026445	171	0	11	0.1286549707602339	ACTH
LONM_HUMAN	57	1.8587934561917965	1.8668282643332157e-4	-2.1227362703920134	3.069028139593087	2.1613467104817476	17.402384206281337	target	2	0	stabilized	2.8566072201831436	2.1613467104817476	3.970903608614387	172	0	11	0.12790697674418605	ACTH
LC7L2_HUMAN	37	2.7321394684085334	4.575770147285616e-4	-3.2714438125828744	4.454368751596401	3.2317215995593416	16.912922536701604	target	2	0	stabilized	2.828077976877449	3.2317215995593416	2.7321394684085334	174	0	12	0.13793103448275862	ACTH
GFPT1_HUMAN	42	2.233752818436401	4.970062280714307e-4	-1.17328378633167	2.175773805336936	1.6926495007087299	16.91125596284651	target	1	0	stabilized	2.8279794335318087	1.6926495007087299	2.233752818436401	175	0	12	0.13714285714285715	ACTH
ANXA6_HUMAN	37	-6.940220583785377	4.873985867714164e-5	-7.214073058448714	8.212483565044023	6.401935952941486	5.785670534760664	target	3	1	stabilized	2.8143666491061747	6.401935952941486	3.6663906344225112	177	0	13	0.14689265536723164	ACTH
PLIN3_HUMAN	37	-9.094678284437617	-0.020982722302228043	-1.4715282504906826	1.0002186962457502	0.43709965298640524	16.006475541316572	target	0	1	destabilized	2.7729933616944797	0.43709965298640524	-9.094678284437617	179	0	14	0.1564245810055866	ACTH
TRAP1_HUMAN	52	1.1842100279962766	3.533036563868691e-4	-1.440591900152576	2.436827500091484	1.9039002123231532	5.934106113963977	target	2	0	stabilized	2.770285675582261	3.0401052683336123	2.9025590477536554	180	0	14	0.15555555555555556	ACTH
PSD1_HUMAN	62	2.9002168780491617	6.629396394790578e-4	-2.5035001470186096	3.533599238912236	2.7810871946852798	3.0034879279336058	target	3	0	stabilized	2.766612178661424	2.7810871946852798	0.7080191707651928	181	0	14	0.15469613259668508	ACTH
PP1RB_HUMAN	42	3.4928772659190224	6.368465711185073	0.9945242674627831	0.30898220563693213	1.7003311037997089	3.3836656433451004	target	4	0	stabilized	2.738047202348691	2.0063041040898373	3.4928772659190224	183	0	15	0.16393442622950818	ACTH
ZN326_HUMAN	57	-24.567026285069744	-3.560620006810106e-6	-1.0347892021058775	1.0008280000019063	0.38763160056323703	15.345688711677768	target	0	1	destabilized	2.730834568894307	0.38763160056323703	-24.567026285069744	184	0	15	0.16304347826086957	ACTH
IF4G2_HUMAN	57	-25.448225587391878	-0.013762367321230831	-2.1139074785514493	1.007234471202406	0.36526820808500404	15.244948285187034	target	0	1	destabilized	2.7242481881869756	0.36526820808500404	-25.448225587391878	185	0	15	0.16216216216216217	ACTH
ROA1_HUMAN	67	-2.4661980689342453	-1.1211688331587217e-4	-1.2615807006571051	1.0044489513839772	0.19217962760586363	6.777269215662278	target	0	3	destabilized	2.7147219051894784	0.19217962760586363	2.8246546960985763	186	0	15	0.16129032258064516	ACTH
2ABA_HUMAN	57	0.4806605205800647	1.7767232323491526e-4	-2.53059676501755	3.5462695807760083	2.6496397019460147	7.200330147110504	target	4	0	stabilized	2.693424794575446	3.454057141755968	3.1895819926918585	187	0	15	0.16042780748663102	ACTH
DCTP1_HUMAN	57	3.101037729568009	9.273450714705721e-4	-1.6776011961967499	2.677092974045765	2.161225416468478	5.168913915465176	target	4	0	stabilized	2.682930477457489	2.3501832339790423	3.327652854758696	188	0	15	0.1595744680851064	ACTH
AGAL_HUMAN	37	0.6846670487147893	0.023582141613101626	-2.0935372973112205	3.0987881828926005	2.1435647064830454	14.550434532000082	target	1	0	stabilized	2.6776208579138325	2.1435647064830454	0.6846670487147893	189	0	15	0.15873015873015872	ACTH
TRIPC_HUMAN	47	1.842760429519811	1.6874881832097568e-4	-1.095622919201765	2.0980434541553743	1.718655026760656	6.683277266943372	target	2	0	stabilized	2.6673922383212663	2.761725562093483	1.842760429519811	190	0	15	0.15789473684210525	ACTH
PFKAM_HUMAN	67	-4.886185500623364	-2.032987963144166e-5	-1.306996023072523	1.001394529721372	0.2259601799332861	14.396016971788702	target	0	1	destabilized	2.666951569140006	0.2259601799332861	-4.886185500623364	191	0	15	0.15706806282722513	ACTH
RPB1_HUMAN	47	0.08438746843358097	2.7087752224660126e-4	-1.31348908290092	2.331173450480437	1.8810899169022697	4.093331117094462	target	5	0	stabilized	2.665927205781546	2.5388669667128765	3.256389934180738	192	0	15	0.15625	ACTH
HNRH2_HUMAN	37	1.7163462833414855	-1.6242440803184447e-4	-0.7051843780647088	0.9943254522045705	0.5453989890127592	5.610034986482619	target	0	2	destabilized	2.6627685576525444	0.3868213586097936	1.7163462833414855	193	0	15	0.15544041450777202	ACTH
SC23A_HUMAN	57	2.2348833602473346	-7.094937209179741e-4	-1.4040367278231662	0.9927636710697357	0.14997568018617263	14.301340147334889	target	0	1	destabilized	2.660353249471581	0.14997568018617263	2.2348833602473346	195	0	16	0.1641025641025641	ACTH
ICAL_HUMAN	37	4.012654994955352	-7.571753370859847e-4	-1.1142504727314215	1.002375116534819	0.28165910270912	4.6736582633584405	target	0	2	destabilized	2.660211141530678	0.28165910270912	4.012654994955352	196	0	16	0.16326530612244897	ACTH
MP2K2_HUMAN	47	-1.3332814975017182	4.9396455856240145e-5	-1.2367520176284594	2.249594958521957	1.85141418330031	3.8637783110848556	target	3	0	stabilized	2.651157787232801	3.7524616924658796	2.6968406114332812	197	0	16	0.16243654822335024	ACTH
MCM7_HUMAN	37	-14.770994900424597	2.528909262095857e-5	-5.5932521467244865	6.597927650199173	5.170961001989995	3.890137371087852	target	5	0	stabilized	2.6389692742239	7.005068457317234	3.3952100031620587	198	0	16	0.16161616161616163	ACTH
IPO5_HUMAN	57	-7.850401152159696	1.0736846948943224e-5	-0.8022726792969972	1.8019428057502138	1.5354873636383208	12.146242394160582	target	3	0	stabilized	2.637589472893706	4.45251433111469	2.5753763420114413	199	0	16	0.16080402010050251	ACTH
RANDOM1391	42	0.8378047314798146	-0.02883116286593661	-1.2333588446812338	1.0042292483858417	0.3468508827628746	10.040616367694868	target	0	5	destabilized	2.6030834508024467	0.2860009133831963	3.120755067094806	201	0	17	0.1691542288557214	ACTH
DC1I2_HUMAN	37	2.461261205673315	6.373761433572578e-4	-2.6542828285014926	3.648353394557432	2.641026550805924	9.143185593053808	target	2	0	stabilized	2.575188170687387	2.641026550805924	2.461261205673315	203	0	18	0.17733990147783252	ACTH
FSCN1_HUMAN	57	-3.6070558221677644	3.238882723469444e-6	-2.328782065147837	3.3340307022967157	2.5395742927879943	12.823985053971292	target	4	0	stabilized	2.551317249833342	3.1898004267329925	0.023801982159933042	206	0	20	0.1941747572815534	ACTH
GLYG_HUMAN	57	2.5338472913333647	5.735701188318703e-4	-2.143600439679047	3.1454929167997427	2.3656042658440137	10.722147901986666	target	2	0	stabilized	2.5503877101213277	2.3656042658440137	2.5338472913333647	207	0	20	0.1932367149758454	ACTH
R113A_HUMAN	37	1.334960170870752	-0.043856249204898404	-1.2039177293095975	1.0024739710260906	0.335192147029763	7.282623204433435	target	0	3	destabilized	2.5441548189929435	0.335192147029763	1.334960170870752	208	0	20	0.19230769230769232	ACTH
IF4B_HUMAN	67	1.1142137995723884	4.227467353039402e-4	-2.3511908377288746	3.339815374997504	2.5871734775186686	4.368663066671175	target	4	0	stabilized	2.5440964891679907	2.5871734775186686	2.8521870300084387	209	0	20	0.19138755980861244	ACTH
UB2V1_HUMAN	47	2.049333025535951	8.260892555945807e-5	-3.7062381157692412	4.719968188112848	3.260486656405815	12.556371421329564	target	1	0	stabilized	2.5302282197248593	3.260486656405815	2.049333025535951	212	0	22	0.20754716981132076	ACTH
CSN3_HUMAN	37	2.2350038644935997	0.018429730677302244	-3.362266799771882	4.3683160376039805	3.3013635591088626	3.815162912623018	target	4	1	stabilized	2.5266275396637727	3.3013635591088626	2.2350038644935997	214	0	23	0.21495327102803738	ACTH
SEPT9_HUMAN	37	1.9559422737223642	6.070182267894806e-4	-1.0906869760268	2.0931462827979943	1.6159347320482438	12.485530381980647	target	2	0	stabilized	2.524570404365717	1.6159347320482438	1.9559422737223642	215	0	23	0.21395348837209302	ACTH
ALBU_HUMAN	37	2.138722545344705	-6.563987315851027e-4	-1.6073522522582075	1.0286985212220694	0.16684183099363295	6.023388297380022	target	1	6	destabilized	2.5109217100381866	0.1308036681896936	2.138722545344705	217	0	24	0.22119815668202766	ACTH
RS3_HUMAN	57	-0.6018976548920647	2.1222435420989712e-4	-2.165499381226561	3.173352783224855	2.4706680085827966	3.575250029194739	target	3	0	stabilized	2.506386981941005	3.6030114346512723	2.9113876751521484	218	0	24	0.22018348623853212	ACTH
IGBP1_HUMAN	52	1.9621680633156917	3.916539619527367e-4	-2.3631524536199886	3.3737195075169164	2.4406226371092234	9.605424497609652	target	2	0	stabilized	2.4926365294101123	2.4406226371092234	1.9621680633156917	219	0	24	0.2191780821917808	ACTH
AHSA1_HUMAN	57	-1.2140324990034983	1.2820317668104495e-4	-1.0406125729328044	2.044336964673001	1.6514918002099606	8.354714613957524	target	3	1	stabilized	2.4844637370285776	3.734879430576084	2.063971451152596	220	0	24	0.21818181818181817	ACTH
THIL_HUMAN	37	2.6979381515989207	6.534236394196679e-4	-4.78850478465718	5.790170897886178	3.8917977645147994	11.941110378691494	target	2	0	stabilized	2.479987100180872	3.8917977645147994	2.6979381515989207	221	0	24	0.2171945701357466	ACTH
NUP43_HUMAN	47	1.84753735955005	3.7438307943938665e-4	-1.5362613266943095	2.513994600126305	1.8964127721741098	11.803977371986642	target	1	0	stabilized	2.468436540100428	1.8964127721741098	1.84753735955005	223	0	25	0.2242152466367713	ACTH
A2MG_HUMAN	67	1.7284490931075307	-2.1723884139536982e-4	-0.9744480674514643	1.004150195782962	0.36221703080266154	4.25551793288883	target	0	3	destabilized	2.457141126442248	0.3275701681512431	2.2417641193543036	225	0	26	0.2311111111111111	ACTH
ACY3_HUMAN	52	3.60112988613853	4.05707690475602	1.0464853005188177	0.24865779340688393	1.8609114584076452	2.6921811975665846	target	4	0	stabilized	2.450828584035117	2.827479008036478	2.9510372748453366	226	0	26	0.23008849557522124	ACTH
NENF_HUMAN	37	3.23789961021388	-9.404508872865006e-4	-0.6221953484439395	0.9973265356820245	0.5720301863584745	4.7029445305466515	target	0	2	destabilized	2.449399318673314	0.38135048697523016	3.23789961021388	227	0	26	0.2290748898678414	ACTH
ACOC_HUMAN	47	-26.767055773573475	-1.349116919507042e-5	-1.1631342031405294	1.0037172503174838	0.32638070533781194	11.30774644051164	target	0	1	destabilized	2.425488016561872	0.32638070533781194	-26.767055773573475	230	0	28	0.24347826086956523	ACTH
MINP1_HUMAN	57	-2.9306991623277394	1.416910198508625e-4	-2.3837289196618636	3.397019837046119	2.4944904114440454	11.261149366682286	target	1	0	stabilized	2.421358692696035	2.4944904114440454	-2.9306991623277394	231	0	28	0.24242424242424243	ACTH
PGM2_HUMAN	37	2.8133498479943944	-6.603579803203327e-4	-0.8301165486158796	0.9842458096997296	0.4237458436446792	11.180674395186417	target	0	1	destabilized	2.414186787480705	0.4237458436446792	2.8133498479943944	235	0	31	0.26382978723404255	ACTH
LG3BP_HUMAN	37	-2.166174810290048	-0.03609412452591458	-1.1368872414227047	1.003048629080774	0.5094338290688528	11.001133154854092	target	0	1	destabilized	2.3979982815704295	0.5094338290688528	-2.166174810290048	236	0	31	0.2627118644067797	ACTH
PIPNB_HUMAN	37	2.7896328466658904	5.874047224584927e-5	-2.631930878846707	3.632605018846415	2.6638709681966812	10.862628695384162	target	2	0	stabilized	2.3853283381976595	2.6638709681966812	2.7896328466658904	239	0	33	0.27615062761506276	ACTH
AP3M1_HUMAN	42	-1.3447036620755404	8.477419456242264e-5	-0.8362961080100231	1.8362608243924639	1.51983525892355	10.5739290342125	target	2	0	stabilized	2.3583914464433287	2.665328535167751	3.1771885240983906	242	0	35	0.2892561983471074	ACTH
AIP_HUMAN	42	2.7364410333745486	6.365926223539232e-4	-2.284173686065105	3.2869803744619657	2.4402521743429086	10.556028185244342	target	2	0	stabilized	2.356697088706132	2.4402521743429086	2.7364410333745486	243	0	35	0.2880658436213992	ACTH
RAB14_HUMAN	57	2.52845781291976	0.02530493999522978	-1.1041653610332829	2.104277248951477	1.7541821564256543	7.207056732608701	target	3	0	stabilized	2.3496649716828513	2.168665288300516	2.52845781291976	244	0	35	0.28688524590163933	ACTH
IDI1_HUMAN	57	2.3397089861282176	-2.1252668217212043e-4	-0.7920551084123963	1.001986863181188	0.4994511081258358	9.01842637668774	target	0	2	destabilized	2.34157691842317	0.4761817009248603	2.3397089861282176	245	0	35	0.2857142857142857	ACTH
MK04_HUMAN	37	2.652638834406205	5.502128495265221e-4	-9.686559233321091	10.689438167990582	7.9807172411177465	7.884753590629154	target	5	0	stabilized	2.318410885107424	7.9807172411177465	2.652638834406205	248	0	37	0.29838709677419356	ACTH
ACTC_HUMAN	67	1.941418925459455	-7.080937655226034e-5	-1.2882541462276444	0.8797518809499604	0.07883326615171925	9.996135478879582	target	0	4	destabilized	2.3021985661901425	0.07883326615171925	3.5491166296540024	250	0	38	0.304	ACTH
VPS35_HUMAN	37	2.906585397798383	5.744458544799464e-4	-6.655703665969998	7.6546457916457635	5.499097352939577	9.893871936754795	target	1	0	stabilized	2.291915569195854	5.499097352939577	2.906585397798383	252	0	39	0.30952380952380953	ACTH
EEA1_HUMAN	37	1.3704621893102817	-1.4565473100188652e-4	-0.8984125991996398	1.0216042362677527	0.47292459470986437	9.816414471340229	target	0	3	destabilized	2.2840559305738655	0.47292459470986437	1.3704621893102817	254	0	40	0.31496062992125984	ACTH
KLC2_HUMAN	42	2.608915133298623	3.441847649914876e-5	-1.8720747165917038	2.8821233048301753	2.254360113910482	9.538611245799537	target	1	0	stabilized	2.255347903144478	2.254360113910482	2.608915133298623	258	0	43	0.3333333333333333	ACTH
RL23A_HUMAN	37	2.801618669402259	5.612793740835189e-4	-3.074964575157721	4.07412659288552	2.9895331884238714	9.486587786611153	target	2	0	stabilized	2.249878989125348	2.9895331884238714	2.801618669402259	260	0	44	0.3384615384615385	ACTH
SERC_HUMAN	67	3.4599511239525307	-9.175758407151454	1.006291038844365	0.6190460645833262	0.37137429655668053	3.1807473235509596	target	0	2	destabilized	2.2479092967083982	0.37137429655668053	2.8028198703589347	261	0	44	0.3371647509578544	ACTH
PRDX3_HUMAN	37	2.313260138877021	-4.270719716858066e-4	-0.8619777843066588	0.9994544319377257	0.4433357479671332	9.166157067848692	target	0	5	destabilized	2.215518121860766	0.4433357479671332	2.313260138877021	262	0	44	0.33587786259541985	ACTH
LRRF1_HUMAN	57	3.039436989738546	6.928726202912387e-4	-1.5270437182290557	2.5323664697557637	2.1855810696173954	3.7114988427058417	target	7	0	stabilized	2.209917916539348	2.395204830393848	3.423437584286975	264	0	45	0.3409090909090909	ACTH
COPA_HUMAN	42	2.1884338578498816	2.8895569756213504e-4	-0.8828147709713795	1.8770391888058588	1.695690484330822	2.4310143424761406	target	3	0	stabilized	2.202354758856732	4.344508166073822	2.1884338578498816	266	0	46	0.3458646616541353	ACTH
TIA1_HUMAN	42	-3.003727768753274	-5.962733297086023e-5	-0.9015652607276584	0.9999687881896908	0.4316351918763193	9.038411660452201	target	0	2	destabilized	2.2014834576893962	0.4316351918763193	2.0886738832559155	267	0	46	0.3445692883895131	ACTH
OGA_HUMAN	42	0.6010794159069999	-2.179228508777462e-4	-0.7484275745459428	1.0011648165001785	0.5411834892827481	8.978926142174208	target	0	2	destabilized	2.1948802918866437	0.5411834892827481	0.6010794159069999	269	0	47	0.34944237918215615	ACTH
CNDP2_HUMAN	57	2.8389013894608066	2.5369641551172684e-4	-1.2514418114596713	2.260477778323666	1.8530097539117234	8.876909231183868	target	2	0	stabilized	2.183453436865928	1.8530097539117234	3.617212405636497	270	0	47	0.34814814814814815	ACTH
KCRU_HUMAN	37	2.021107117522722	-4.938280526276233e-4	-1.1814884822274259	1.0954116221946149	0.4036539241308251	8.853941176415658	target	0	1	destabilized	2.1808626905580013	0.4036539241308251	2.021107117522722	271	0	47	0.34686346863468637	ACTH
ATX2L_HUMAN	42	-1.400870821554621	4.1452304682240757e-5	-0.9561021585649696	1.9589337413015468	1.609308447085035	3.2645823574569057	target	2	0	stabilized	2.175478604804908	1.8237991663137285	3.2736207333030105	272	0	47	0.34558823529411764	ACTH
CFA69_HUMAN	57	3.57998446334994	-9.539613470518898	0.7638403427875591	0.7615424551370444	0.34936944647800683	2.8693840342358206	target	0	4	destabilized	2.173526265796807	0.2916541838171866	3.4907209989899823	273	0	47	0.3443223443223443	ACTH
NPC2_HUMAN	67	1.8337616459471495	-3.847303573441623e-4	-0.9251579685832365	1.005253882251808	0.4358158697367358	8.788359805055292	target	0	1	destabilized	2.1734280964533816	0.4358158697367358	1.8337616459471495	274	0	47	0.34306569343065696	ACTH
UGGG1_HUMAN	52	0.8663936584462065	-3.66029687600215e-4	-0.6666477895254543	1.0005563810762876	0.596861873220515	4.673935343177338	target	0	2	destabilized	2.1691125750894704	0.547885511640077	0.8663936584462065	275	0	47	0.3418181818181818	ACTH
RS13_HUMAN	47	-9.543865547167039	3.561847290325478e-5	-6.4183027191392	7.49424366795204	5.709846071725582	4.276001397297145	target	4	0	stabilized	2.1679265509327865	5.709846071725582	3.2056872907718765	276	0	47	0.34057971014492755	ACTH
OFUT1_HUMAN	42	1.9739570775055935	-1.724722385653642e-4	-0.5898574386150834	0.9857156315477842	0.6280899855928443	8.686470365407146	target	0	1	destabilized	2.1617666847771435	0.6280899855928443	1.9739570775055935	277	0	47	0.33935018050541516	ACTH
BIEA_HUMAN	37	3.049581904587097	1.6353615316824457e-4	-2.7227391579918736	3.723567308698812	2.8796098270294452	8.581113391910469	target	2	0	stabilized	2.1495636710379284	2.8796098270294452	3.049581904587097	278	0	47	0.3381294964028777	ACTH
RRBP1_HUMAN	42	3.4780630634794227	9.378199595649686	0.7645804128343597	0.5115531140545052	1.5227247079827702	3.1449353212392017	target	3	0	stabilized	2.149316293053449	1.7255485588275974	3.4780630634794227	279	0	47	0.33691756272401435	ACTH
PATL1_HUMAN	42	2.7210178108510865	-0.0010624444431897788	-1.402269037484079	1.0345936951569612	0.22984631462346178	6.25139759066453	target	0	3	destabilized	2.1488386439666365	0.11526276707207181	2.7210178108510865	280	0	47	0.3357142857142857	ACTH
COPB_HUMAN	57	2.8893740197008055	6.746042204526004e-4	-0.8540880495874141	1.856467094891964	1.535007481087752	8.531589887878413	target	1	0	stabilized	2.1437757319290243	1.535007481087752	2.8893740197008055	281	0	47	0.33451957295373663	ACTH
VIGLN_HUMAN	57	3.1523074986850528	-8.582397994112137e-4	-1.4533264161961914	1.0124836115227196	0.2010125288583056	8.496868509760413	target	0	1	destabilized	2.139697684999985	0.2010125288583056	3.1523074986850528	285	0	50	0.3508771929824561	ACTH
RIOX1_HUMAN	57	0.8557796692223322	-2.145483328646234e-4	-1.636034836756616	1.0214525965898833	0.09396093854220428	8.471826298956389	target	0	1	destabilized	2.136746105132872	0.09396093854220428	0.8557796692223322	287	0	51	0.3554006968641115	ACTH
UBP16_HUMAN	37	0.09379532106171841	-1.9771190751682757e-4	-1.186884249464159	1.0101186253548982	0.3578144947649337	8.465326464998943	target	0	2	destabilized	2.135978581291396	0.3578144947649337	0.09379532106171841	288	0	51	0.3541666666666667	ACTH
SPT5H_HUMAN	57	-3.1990662164454795	-8.823020302850848e-5	-1.0878421596380823	0.9929016022253428	0.31654825667004527	8.423548965706386	target	0	1	destabilized	2.13103123181546	0.31654825667004527	-3.1990662164454795	290	0	52	0.3586206896551724	ACTH
EF1B_HUMAN	37	-2.3781144948568813	4.712714704553036e-5	-2.1001633241141198	3.1068808078820878	2.293931932107831	6.787625952817095	target	2	0	stabilized	2.129617641961423	2.293931932107831	3.335182986237438	291	0	52	0.35738831615120276	ACTH
MAT2B_HUMAN	57	2.4212360003604965	6.433860664603705e-4	-1.0628003044210028	2.0629599170334463	1.6310406684398613	8.341425997285116	target	1	0	stabilized	2.1212341846426512	1.6310406684398613	2.4212360003604965	295	0	55	0.3728813559322034	ACTH
SYIC_HUMAN	47	-4.128559340813562	-4.746731994210827e-6	-1.1382201959387823	1.0113232647318744	0.25588091958111914	7.157111904672713	target	1	3	destabilized	2.11423812438723	0.25588091958111914	3.360839874205434	297	0	56	0.3771043771043771	ACTH
NLE1_HUMAN	67	-151.10789763225648	-0.0027627433565312384	-2.002982779649348	1.0002754079442084	0.281222864912656	8.233511435851812	target	0	1	destabilized	2.108212586616691	0.281222864912656	-151.10789763225648	299	0	57	0.38127090301003347	ACTH
UBC12_HUMAN	37	3.4269671419174146	2.883316487307554e-4	-2.850594576208655	3.8518328474423393	2.8186223412948648	7.2291641286807495	target	3	0	stabilized	2.1028217674194	2.8186223412948648	3.4269671419174146	301	0	58	0.3853820598006645	ACTH
ERH_HUMAN	37	0.19097351083431496	-1.9177100850002764e-4	-0.7803748287548052	1.0003214373985425	0.4784929809921243	8.138875967694444	target	0	1	destabilized	2.0966520829726663	0.4784929809921243	0.19097351083431496	302	0	58	0.3841059602649007	ACTH
DLDH_HUMAN	37	-5.120153626515436	-4.8843997204270344e-5	-0.8859860856694314	1.001095177494286	0.44207055201756557	8.091890064484497	target	0	3	destabilized	2.090862333509369	0.44207055201756557	3.490680275515317	303	0	58	0.38283828382838286	ACTH
POTEJ_HUMAN	37	2.7975136791783153	-2.956382847020793e-4	-1.354389514505118	0.9278545318573598	0.15501158440211654	8.066252792752746	target	0	1	destabilized	2.087689036494754	0.15501158440211654	2.7975136791783153	305	0	59	0.38688524590163936	ACTH
MCM6_HUMAN	67	3.1432858698625017	-5.464217234414983e-4	-1.0979822057535924	1.0004187951584773	0.3003804258017205	4.087188532167405	target	1	3	destabilized	2.08037515535145	0.3003804258017205	2.9723514085109253	307	0	60	0.39087947882736157	ACTH
RL24_HUMAN	37	2.22569551614235	3.8289167930933985e-4	-4.92795547211259	5.916221731403244	4.24920152864473	7.976217393474779	target	3	0	stabilized	2.0764642882403046	4.24920152864473	2.22569551614235	308	0	60	0.38961038961038963	ACTH
RLA0_HUMAN	42	1.9350465806457036	9.635993382039183e-5	-0.7708642838422894	1.773976598676488	1.5311667008032914	3.1424560132014907	target	4	1	stabilized	2.0687071435185476	2.006830907354093	1.9350465806457036	313	0	64	0.40894568690095845	ACTH
VPS18_HUMAN	37	1.9547127286877437	5.219640857654743e-4	-3.7025020186251894	4.707711247360191	3.2063229194800886	7.899862231427057	target	1	0	stabilized	2.0668453202610473	3.2063229194800886	1.9547127286877437	314	0	64	0.40764331210191085	ACTH
COPB2_HUMAN	37	2.8069991398901957	7.028934213772925e-4	-3.9893386840806233	5.092218566248034	3.7691899995328244	7.869302295398233	target	1	0	stabilized	2.0629694048015303	3.7691899995328244	2.8069991398901957	316	0	65	0.41139240506329117	ACTH
HS71L_HUMAN	57	0.7685928217289043	2.2651927058151632e-4	-1.7985223417179723	2.8167557073162977	2.2875325898027854	4.247295967369915	target	4	0	stabilized	2.0590432383296795	4.452749221781531	3.2277140577600276	318	0	66	0.41509433962264153	ACTH
AAMP_HUMAN	37	3.5181240931354227	2.8306669144098894e-4	-2.1220737154707248	3.129660336445523	2.5890431202035464	3.7605345630589317	target	4	0	stabilized	2.05844032161683	2.5890431202035464	3.5181240931354227	319	0	66	0.41379310344827586	ACTH
HSP72_HUMAN	47	3.1078241909853617	0.0012201226823614266	-1.732623919919098	2.7327200944360346	2.202179913193541	2.3984816795525816	target	3	0	stabilized	2.0584067537846247	2.427108208233541	3.0538450840265794	320	0	66	0.4125	ACTH
LSM4_HUMAN	67	2.9226142123121015	-3.919269534700818e-4	-1.0683359994191226	0.9966526485407288	0.2631691095649463	7.759456068019009	target	0	1	destabilized	2.048912237410958	0.2631691095649463	2.9226142123121015	323	0	68	0.42105263157894735	ACTH
HDGF_HUMAN	67	2.237235471740532	-1.8372860799020904e-4	-0.6488303109051494	0.9999449350324392	0.5733675925278171	7.757485459579022	target	0	1	destabilized	2.0486582429691955	0.5733675925278171	2.237235471740532	324	0	68	0.41975308641975306	ACTH
DCPS_HUMAN	37	-0.4248808858085225	-1.2165340619305218e-4	-0.7307984441839448	1.001293548598858	0.4312241212372023	4.618030733739641	target	0	2	destabilized	2.047457158256978	0.4312241212372023	-0.4248808858085225	325	0	68	0.41846153846153844	ACTH
CAH2_HUMAN	37	2.6942444895499644	3.4948573040860287e-4	-3.0581149122146685	3.8643501934776867	2.699007948904279	7.733128329140703	target	2	1	stabilized	2.0455134804899404	2.699007948904279	2.6942444895499644	326	0	68	0.4171779141104294	ACTH
DDAH1_HUMAN	37	1.9325016125900973	-2.3221031124765417e-4	-1.2739904444346355	1.0003068620843865	0.18190967213215592	7.678154238131564	target	0	2	destabilized	2.0383791846982193	0.18190967213215592	1.9325016125900973	327	0	68	0.41590214067278286	ACTH
RAB12_HUMAN	47	2.939727159536009	6.79238337135212e-4	-2.0629958975369274	3.063400751029306	2.310515087342673	7.662003455151098	target	2	0	stabilized	2.036273497224727	2.895241633808823	3.218002748318116	329	0	69	0.4194528875379939	ACTH
HS90B_HUMAN	37	-1.019838727289338	1.0400468340137624e-4	-2.7138528954563124	3.7200002837350747	2.591502199843768	7.548303242884243	target	3	1	stabilized	2.021322801962183	2.591502199843768	3.222207176669088	334	0	73	0.437125748502994	ACTH
KCY_HUMAN	37	2.753783955681906	1.72382284092054e-4	-3.0744102864157377	4.088135807557357	2.982995201609138	7.5426744708165225	target	1	0	stabilized	2.0205768234794714	2.982995201609138	2.753783955681906	335	0	73	0.43582089552238806	ACTH
K1C24_HUMAN	37	2.987550805184094	1.1742807158954846e-4	-3.628747738059612	4.624984706402416	3.4276958688529158	5.195703703927708	target	2	1	stabilized	2.0124868244882226	3.4276958688529158	2.987550805184094	338	0	75	0.4437869822485207	ACTH
SORCN_HUMAN	57	-39.16981143034098	8.489960848184615e-7	-0.9405223825115272	1.9410204827131738	1.5972475334094642	7.423049629076979	target	1	0	stabilized	2.004589973964734	1.5972475334094642	-39.16981143034098	339	0	75	0.4424778761061947	ACTH
U2AF2_HUMAN	47	-43.171162550425656	-3.9049117753600296e-4	-0.6893999605015482	1.005264837175077	0.5262329329780931	2.8902558745102636	target	1	3	destabilized	1.9988143760290753	0.5262329329780931	0.5046176727927483	340	0	75	0.4411764705882353	ACTH
EXOS9_HUMAN	37	-1.7583384133979167	-1.744882311084394e-4	-1.4616651850045774	1.0190801010614636	0.1485398130588158	7.372932808919589	target	0	2	destabilized	1.9978155658396615	0.1485398130588158	6.46963109907295	341	0	75	0.4398826979472141	ACTH
CAP1_HUMAN	57	2.862211440811424	5.716806457300123e-4	-1.2169624810402278	2.21721218376739	1.782879666297988	7.3679727404117035	target	2	1	stabilized	1.9971425992191942	5.558831782646352	2.862211440811424	342	0	75	0.43859649122807015	ACTH
SPF30_HUMAN	67	-6.437009626154088	4.6807888822358197e-5	-2.3425165648526445	3.1939413841530473	2.1966954456483685	7.350095281484939	target	4	0	stabilized	1.9947132766080589	2.1966954456483685	2.7115532572940357	343	0	75	0.43731778425655976	ACTH
GGH_HUMAN	67	-7.306872905788896	-9.650215991176014e-5	-1.355302241692181	1.014935887386827	0.24459823357128332	7.323089402664024	target	0	2	destabilized	1.9910322884796283	0.24459823357128332	1.9548469979510907	345	0	76	0.44057971014492753	ACTH
NFM_HUMAN	42	2.229048969244798	4.025320034907467e-4	-1.5613318196813102	2.5617106145677697	2.054291344966304	7.295229188193131	target	4	1	stabilized	1.9872205986427387	2.054291344966304	2.229048969244798	347	0	77	0.4438040345821326	ACTH
PSPC1_HUMAN	37	0.5563067948675358	1.2794499186471512e-4	-3.184818908153594	4.182060300662548	3.3522511480427735	4.465001231068165	target	3	1	stabilized	1.9855870549058396	3.3522511480427735	0.5563067948675358	348	0	77	0.4425287356321839	ACTH
PROF2_HUMAN	37	-2.005180500869183	9.788899933462029e-5	-2.9095771523952747	4.35379317121802	3.474507495218299	7.221373905441948	target	1	0	stabilized	1.9770452264140408	3.474507495218299	-2.005180500869183	350	0	78	0.44571428571428573	ACTH
HPBP1_HUMAN	47	-37.26455632849438	0.0025991304890162765	-2.270964994721071	3.2725628905737585	2.3844300761878805	7.206724388488466	target	1	0	stabilized	1.975014533014364	2.3844300761878805	-37.26455632849438	351	0	78	0.4444444444444444	ACTH
RABE1_HUMAN	67	1.6546815726727064	-3.131526939194678e-4	-1.2180193900920615	0.9457448053882127	0.23706108298767634	7.145179355551566	target	0	1	destabilized	1.9664379133133199	0.23706108298767634	1.6546815726727064	352	0	78	0.4431818181818182	ACTH
TXLNA_HUMAN	47	3.244758554143381	7.472860584577185e-4	-1.2014858146444567	2.1861933335237747	2.088495702682043	2.049962681584693	target	5	0	stabilized	1.9591993647623327	2.088495702682043	3.376353586646604	355	0	80	0.4507042253521127	ACTH
PSB2_HUMAN	57	2.730360407203241	5.779978956819654e-4	-2.3250663141363983	3.3325732154831957	2.526596271077481	7.068203009247075	target	3	0	stabilized	1.9556062763493125	2.526596271077481	3.245253178028758	357	0	81	0.453781512605042	ACTH
UFM1_HUMAN	42	1.6763208084508554	1.983592208412267e-4	-1.1216944709412788	2.1246314497453938	1.6647533219910426	6.978370697558282	target	3	0	stabilized	1.942815465107977	2.0516193642330793	1.6763208084508554	359	0	82	0.4568245125348189	ACTH
AP2B1_HUMAN	52	-3.6460772774778647	2.0486405726786223e-5	-1.7958130930092697	2.798651695601086	2.1794138250489414	6.9225194313721765	target	1	0	stabilized	1.9347797830467148	2.1794138250489414	-3.6460772774778647	362	0	84	0.46408839779005523	ACTH
SNUT1_HUMAN	37	-4.339778468098187	3.7829802375277005e-6	-1.9153820528389385	2.9148727448104257	2.2865157814085237	6.91471434220918	target	2	1	stabilized	1.9336516543876938	2.2865157814085237	-4.339778468098187	364	0	85	0.46703296703296704	ACTH
PURA2_HUMAN	57	2.577155907208915	2.373463121728379e-4	-1.505439285488345	2.4975519499150165	1.9816361948499728	6.888975591121301	target	2	0	stabilized	1.9299223934376022	1.9816361948499728	3.256513831954037	366	0	86	0.46994535519125685	ACTH
U520_HUMAN	37	2.350953553845845	4.83644976193815e-4	-2.8440451743361232	3.850744918862684	2.7534508124461494	6.887682385004496	target	5	0	stabilized	1.9297346547098435	3.0220359681661435	2.350953553845845	367	0	86	0.46866485013623976	ACTH
DRG1_HUMAN	37	3.3689509254721828	4.3721464520518497e-4	-5.739630495140177	6.788008368818114	5.051959356283547	6.878954615436961	target	3	0	stabilized	1.9284666949697016	5.051959356283547	3.3689509254721828	368	0	86	0.4673913043478261	ACTH
PSME3_HUMAN	47	-4.156818318228825	7.850840037758393e-5	-1.0275930541674163	2.0286201138013067	1.6534107934503146	6.831176567468613	target	1	0	stabilized	1.9214969233835428	1.6534107934503146	-4.156818318228825	370	0	87	0.4702702702702703	ACTH
CDK1_HUMAN	42	2.9237426248847016	4.15546855694358e-4	-1.524259671733399	2.5243973228048486	2.001293762494693	6.796897727406127	target	3	0	stabilized	1.9164662915257025	5.891638259195428	1.3414933770106383	374	0	90	0.48128342245989303	ACTH
OTUB1_HUMAN	37	3.1259040164467176	5.288955114685439e-4	-5.128149281022845	6.137145199127375	4.724240513027142	5.158217216779285	target	2	0	stabilized	1.9127066800631172	4.724240513027142	3.1259040164467176	377	0	92	0.4880636604774536	ACTH
AMRP_HUMAN	52	3.691220477335269	3.6945835497959596	0.8229937029024623	0.37914567995093523	1.6885757662028686	3.602681875155834	target	3	0	stabilized	1.9111911662054712	4.113066659873784	3.7497227898321515	379	0	93	0.49076517150395776	ACTH
TNPO2_HUMAN	42	0.8901767656030862	3.2037875467291787e-4	-1.057339296136789	2.057460801501687	1.633297086917148	6.734140437284274	target	1	0	stabilized	1.9071901754789908	1.633297086917148	0.8901767656030862	382	0	95	0.4973821989528796	ACTH
SYTC2_HUMAN	42	-0.032696198605812736	1.5821444907296742e-4	-2.722618484941406	3.7250807481516373	2.7710506387319818	6.731597926365166	target	4	0	stabilized	1.9068125488118657	2.7710506387319818	3.4011031218884478	383	0	95	0.4960835509138381	ACTH
IF2A_HUMAN	37	2.245483701863976	4.5107452777818355e-4	-2.2901023608132998	3.290365546687845	2.531229235339652	6.712577871345201	target	1	0	stabilized	1.903983060712974	2.531229235339652	2.245483701863976	385	0	96	0.4987012987012987	ACTH
GLO2_HUMAN	42	3.2761843023373056	-9.672514212761127e-5	-1.0014573202991977	1.034087761443773	0.3424649360161099	3.3039732965264985	target	1	4	destabilized	1.894180800597196	0.3424649360161099	3.2761843023373056	389	0	99	0.5089974293059126	ACTH
K1C14_HUMAN	67	2.7400903486680868	5.263456265712273e-4	-2.4746497640550014	3.5698039182559875	2.7247247845504625	6.62088994243737	target	3	0	stabilized	1.8902297933060446	4.09562803429823	4.313786009010263	390	0	99	0.5076923076923077	ACTH
CP135_HUMAN	57	1.7406633292774838	2.682594583111788e-4	-1.0892380081308757	2.0876304902949676	1.7769857025586402	3.5310778603252895	target	4	0	stabilized	1.8886349922381551	2.082688904290756	3.4943965912589476	391	0	99	0.5063938618925832	ACTH
STRAP_HUMAN	37	3.017984082052175	3.8381847131182303e-4	-1.2685872064775991	2.269395071750559	1.8273743138601524	6.5684474347674495	target	2	1	stabilized	1.8822774932718906	2.0802847933533695	3.017984082052175	394	0	101	0.5126903553299492	ACTH
PCBP1_HUMAN	37	-45.583168632615205	0.019785558816854915	-14.143659934925811	15.145464127645267	2.681932240046721	6.545305091786471	target	3	1	stabilized	1.878748012757714	2.681932240046721	1.8566149339942284	395	0	101	0.5113924050632911	ACTH
UMPS_HUMAN	52	2.3421348692202963	0.016615910281283824	-1.3698916368567347	2.370527772344881	1.9250829683290454	6.519215380111535	target	1	0	stabilized	1.8747540282233748	1.9250829683290454	2.3421348692202963	397	0	102	0.5138539042821159	ACTH
STAT3_HUMAN	47	-0.12186626229863116	0.00437951623597789	-1.0853428482244465	2.0897655385092206	1.6109787139150773	6.5158621242404315	target	2	0	stabilized	1.8742395309457096	3.6469412445618206	3.1010071771160885	398	0	102	0.5125628140703518	ACTH
JUPI2_HUMAN	67	3.0227916094030207	6.2101705531123e-4	-2.8493151349847285	3.8446586948856387	2.857327557296478	6.482330796391869	target	1	0	stabilized	1.8690801364921692	2.857327557296478	3.0227916094030207	400	0	103	0.515	ACTH
CATB_HUMAN	42	3.544153826709827	-0.001397642120205	-1.4479709795057072	1.012213667865125	0.19403705007256694	6.472094496137969	target	0	2	destabilized	1.8674997804125746	0.19403705007256694	3.544153826709827	401	0	103	0.513715710723192	ACTH
C19L1_HUMAN	52	2.4213830558700313	-4.711760195949725e-4	-1.569747322773312	1.0148294379670348	0.09433146871257288	4.6702945021836095	target	0	3	destabilized	1.8673266956206716	0.07939103472670582	0.5905519408694381	402	0	103	0.5124378109452736	ACTH
ATPB_HUMAN	37	1.9161859300844721	-6.555512955499067e-4	-0.8291688048237091	1.001075809678527	0.4955503308425905	4.680747518784595	target	0	2	destabilized	1.859778184325	0.38363632495890004	1.9161859300844721	406	0	106	0.5221674876847291	ACTH
FARP2_HUMAN	67	3.4058772053758033	7.274460293602324	1.2628078298713832	0.14538101831552622	1.7643573919763778	2.8637188612118805	target	2	0	stabilized	1.8469215504113525	2.0516756307393216	3.4245992713524727	409	0	108	0.5281173594132029	ACTH
H1T_HUMAN	37	2.8562874808644456	2.2655633239961976e-4	-2.3870383605932317	3.416301274663063	2.6022956280587097	6.325025549316774	target	3	0	stabilized	1.8445140740230974	2.6022956280587097	2.8562874808644456	410	0	108	0.526829268292683	ACTH
HNRPM_HUMAN	37	0.8996496945075947	0.0796979918633176	-1.6885553649645464	2.6895150249850603	1.8588801273596196	4.570910422737897	target	3	0	stabilized	1.8438386786721912	2.0676828582209965	0.8996496945075947	411	0	108	0.5255474452554745	ACTH
K1C9_HUMAN	57	3.0098504550575336	8.041543145564522e-4	-1.7792560733262426	2.8058611447819644	2.29358455141405	2.6640427494790697	target	5	0	stabilized	1.8430632977381003	2.5152039267459796	4.065598072088073	412	0	108	0.5242718446601942	ACTH
CAF1B_HUMAN	57	-0.4817702489597918	0.038708942196479426	-3.206517469035827	4.208555510152959	2.6216279292007036	6.25087572498405	target	2	0	stabilized	1.8327215699304287	2.6216279292007036	1.6887533726977153	418	0	113	0.5406698564593302	ACTH
HMGB1_HUMAN	57	3.1287266845217303	-7.292673324791454e-4	-0.5122483842614867	0.9984577682535559	0.6058705896954876	3.555082084209528	target	0	3	destabilized	1.824971550004575	0.35866712405232853	3.1287266845217303	423	0	117	0.5531914893617021	ACTH
RN181_HUMAN	52	-17.11585966376033	0.010770944285723292	-1.8373128515220658	2.85514115855319	1.8430943265313142	6.19926325628349	target	1	0	stabilized	1.8244304553585506	1.8430943265313142	-17.11585966376033	424	0	117	0.5518867924528302	ACTH
ULA1_HUMAN	37	2.672900923835129	4.714196439235205e-4	-4.094570066686284	5.096635448253815	3.697262042012213	6.110674427105204	target	1	0	stabilized	1.8100371479602664	3.697262042012213	2.672900923835129	433	0	125	0.5773672055427251	ACTH
RANG_HUMAN	52	1.2301945014139009	1.4095983198750796e-4	-1.007887928828	1.9999316942197367	1.639311103633713	6.065518964496458	target	2	0	stabilized	1.8026201058411213	1.8701991464169794	1.2301945014139009	437	0	128	0.585812356979405	ACTH
NOC2L_HUMAN	42	3.091045353889465	8.537706102916225e-4	-1.2500579566562666	2.250278406819303	1.8292583604329444	6.063341172641304	target	1	0	stabilized	1.8022609967650938	1.8292583604329444	3.091045353889465	438	0	128	0.5844748858447488	ACTH
PABP3_HUMAN	37	1.9930115229141656	-6.806000812174597e-5	-1.0429130369875748	0.9271561609530562	0.3487668857939967	6.026222768507655	target	0	2	destabilized	1.796120407915231	0.3487668857939967	1.9930115229141656	440	0	129	0.5863636363636363	ACTH
CYFP2_HUMAN	57	0.6314765820996697	1.0008967891411889e-4	-2.5011738280978655	3.513110604462124	2.744819034272462	5.906936057466472	target	4	0	stabilized	1.7912041429355903	2.744819034272462	2.53581821177381	443	0	131	0.5914221218961625	ACTH
RBBP7_HUMAN	37	3.0790059254729525	7.87574157913983e-4	-1.5234625141372073	2.4808041024699268	2.0640764909811926	5.968543693178852	target	2	1	stabilized	1.786502960155942	2.0640764909811926	3.0790059254729525	445	0	132	0.5932584269662922	ACTH
ML12A_HUMAN	57	3.13500896524726	7.183436986131557e-4	-0.8151450459589797	1.8257267788360185	1.5543414577205903	5.9415132224801965	target	2	0	stabilized	1.7819638521902537	4.6561250826854135	2.0739232544758326	448	0	134	0.5982142857142857	ACTH
GRB2_HUMAN	47	2.8160934960017796	5.796460551925642e-4	-1.1527237597131978	2.14791965751672	1.7615778454623052	5.924413651583579	target	1	0	stabilized	1.7790817203661111	1.7615778454623052	2.8160934960017796	451	0	136	0.6031042128603105	ACTH
TLE3_HUMAN	52	2.4884893059988733	3.023144083607316e-4	-1.1074237497615527	2.1119517031276915	1.7291905502616904	5.91147161856278	target	2	0	stabilized	1.7768948052544067	3.045993029344109	2.4884893059988733	453	0	137	0.6048565121412803	ACTH
DPYL2_HUMAN	37	3.0367889242091266	5.98756795690028e-4	-0.8583171440934765	1.8475573625829778	1.5805136501101393	5.900291804474659	target	1	0	stabilized	1.7750018080741834	1.5805136501101393	3.0367889242091266	454	0	137	0.6035242290748899	ACTH
HS71A_HUMAN	37	3.136529388984632	3.3231796199807234e-4	-2.121799035260021	3.122705196585636	2.576961558544209	5.86746482121972	target	4	0	stabilized	1.7694226531937038	2.576961558544209	3.136529388984632	459	0	141	0.6143790849673203	ACTH
PI42C_HUMAN	67	2.422934025643328	4.974752990580879e-4	-1.8347772834828873	2.7923584243031354	2.221030025807865	5.849618895103382	target	1	0	stabilized	1.7663765129854894	2.221030025807865	2.422934025643328	462	0	143	0.6190476190476191	ACTH
RL27A_HUMAN	47	3.6015048191146466	4.635106118290377	0.7352127421953099	0.46303631069872414	1.546385566709241	3.9807122289844448	target	4	0	stabilized	1.7604309028464984	3.5908124006468474	3.314584232285422	464	0	144	0.6206896551724138	ACTH
TPM3_HUMAN	37	2.6512419215012826	-1.9325523560801753e-4	-0.9293285998278122	1.0107777572322496	0.4875471684260952	5.755912436811232	target	0	1	destabilized	1.750227576402675	0.4875471684260952	2.6512419215012826	468	0	147	0.6282051282051282	ACTH
DEOC_HUMAN	37	1.9210919892977254	-4.3749600255403777e-4	-0.728447911823495	1.0062270739444141	0.5872185970388211	5.746785405079527	target	0	1	destabilized	1.748640638490787	0.5872185970388211	1.9210919892977254	471	0	149	0.6326963906581741	ACTH
NHRF1_HUMAN	57	2.9322794861035577	4.2062086941552896e-4	-0.9052976356710538	1.8984215967167206	1.648347977152345	3.332415232021136	target	3	0	stabilized	1.745533473158435	1.8208326352600952	3.2119037073472443	473	0	150	0.6342494714587738	ACTH
PTN11_HUMAN	67	3.437345500389563	7.78747899053201	0.8588006482234074	0.48115607894837514	1.598705422520896	2.4481471630157117	target	2	0	stabilized	1.7408389839677825	1.6406240496853621	3.980577991340574	478	0	154	0.6443514644351465	ACTH
RS16_HUMAN	52	0.2997808189972078	0.11139189272724162	-3.2013327480373652	4.225952206903726	2.314352305403426	2.4731133317825944	target	2	0	stabilized	1.7393301754631953	3.289558897188617	0.8705930561783646	479	0	154	0.6430062630480167	ACTH
FA49B_HUMAN	67	3.6724376928299356	-5.604028289409806e-4	-1.1700777316331508	0.9669629314701615	0.2718392562525089	5.683719924808198	target	0	1	destabilized	1.7376059347084143	0.2718392562525089	3.6724376928299356	481	0	155	0.6444906444906445	ACTH
RPB7_HUMAN	57	1.187948878960574	3.0032131759697236e-4	-1.8511787484514013	2.830101772067222	2.1483264178925725	5.64772993475758	target	3	0	stabilized	1.7312536829637177	6.301762859301227	4.220290561724514	483	0	156	0.6459627329192547	ACTH
CHSP1_HUMAN	67	2.8339305267516783	-7.530949309012709e-4	-0.6939089872559434	1.0118798326150822	0.5735074881821872	4.767966279603544	target	0	3	destabilized	1.7294028073637973	0.3652840891422747	2.5785991589606088	485	0	157	0.6474226804123712	ACTH
1433T_HUMAN	37	3.281139240311644	5.792396374914424e-4	-2.19910528042878	3.1494936251230157	2.5584312168901517	5.5999881702083725	target	2	1	stabilized	1.7227644852760817	2.5584312168901517	3.281139240311644	488	0	159	0.6516393442622951	ACTH
UB2V2_HUMAN	42	0.9813490991899677	2.0666559231998177e-4	-2.4387139121828785	3.4295311671692508	2.7262952686238515	3.9954626678197562	target	3	0	stabilized	1.719660007470586	2.7262952686238515	0.9813490991899677	492	0	162	0.6585365853658537	ACTH
CASP6_HUMAN	37	-10.665446199110441	-3.5242463769055215e-5	-1.3159631806058276	1.0247092210025053	0.20924469996800432	5.57849167887646	target	0	2	destabilized	1.718918431408228	0.20924469996800432	2.9684259765949212	493	0	162	0.6572008113590264	ACTH
RS4X_HUMAN	37	2.744518683667516	7.580667038429093e-4	-5.215085723087214	6.211583632701383	4.49255930555528	5.542742393068452	target	4	1	stabilized	1.7168467673330614	4.49255930555528	2.744518683667516	496	0	164	0.6612903225806451	ACTH
CK5P2_HUMAN	42	2.882014597555014	3.3648381922395457e-4	-0.7154513970413487	1.717827711094785	1.5007055043955606	5.555207471803337	target	3	0	stabilized	1.7147357710536162	1.9539115402476708	2.882014597555014	499	0	166	0.6653306613226453	ACTH
PDC6I_HUMAN	37	2.1084385974304403	6.160011812729976e-4	-2.4979620744529942	3.9465996787954793	3.121500576846018	5.4948667961066455	target	3	0	stabilized	1.7038143466348616	3.4399513590356654	2.1084385974304403	505	0	171	0.6772277227722773	ACTH
IF4A3_HUMAN	37	3.3769074014405223	0.001079237834347797	-2.6997192425595493	3.702221703294073	2.759293151583016	5.493412774059314	target	2	0	stabilized	1.7035496970058575	2.759293151583016	3.3769074014405223	506	0	171	0.6758893280632411	ACTH
SODM_HUMAN	37	3.307243636126474	6.164651461700139e-4	-1.4636568257206877	2.4666893465691233	2.09187129645807	3.1379910075598083	target	2	0	stabilized	1.7034804749206933	2.09187129645807	3.307243636126474	507	0	171	0.6745562130177515	ACTH
RHOA_HUMAN	37	2.276701471757761	5.754448289845978e-4	-4.14004408009375	5.333482455747782	4.005270399363564	5.476532254121	target	2	0	stabilized	1.7004721003143985	4.005270399363564	2.276701471757761	510	0	173	0.6784313725490196	ACTH
DDX5_HUMAN	37	-0.3626968437033859	5.66318584663347e-5	-4.332397603637661	5.332757533918132	4.621501274131872	4.192303892114617	target	4	1	stabilized	1.6931589658779063	5.636633472919688	3.3499123402757336	513	0	175	0.682261208576998	ACTH
HNRH1_HUMAN	57	3.3839989888211033	-8.972126066125437	1.2823933791473978	0.5608127989369384	0.2138153885665141	2.8585497577216556	target	0	2	destabilized	1.6898831153218872	0.10823286040123684	3.3839989888211033	514	0	175	0.6809338521400778	ACTH
ARK74_HUMAN	42	-3.202875848582269	1.4422716612203839e-5	-1.5619336695542199	2.573771665685594	2.016277962672887	5.410303722282572	target	2	0	stabilized	1.6883052321850573	2.016277962672887	3.5976982603244845	516	0	176	0.6821705426356589	ACTH
ILEU_HUMAN	57	2.7212124363490773	8.1066713959203e-5	-5.6104041032997385	6.55892207619467	5.170391838823078	3.758364299061965	target	2	0	stabilized	1.684146566528427	5.170391838823078	3.338978773926051	519	0	178	0.6859344894026975	ACTH
RANDOM1669	47	3.4474533676648083	6.823388780893452	1.1422334762432946	0.20914624896113265	1.7367809022779248	2.749794677358066	target	4	0	stabilized	1.6831048512973148	3.030745054164872	3.3452458564651244	521	0	179	0.6871401151631478	ACTH
EIF3G_HUMAN	62	2.5554749863308497	6.096631965355066e-4	-1.7882018271731566	2.762593342935446	2.1692416965967767	4.729121437032869	target	3	0	stabilized	1.6804288122845348	2.1784591496733	2.1791756253317973	524	0	181	0.6908396946564885	ACTH
RO60_HUMAN	67	3.1699078887400405	-0.0010453213123937863	-1.014364667548664	0.9146055377273239	0.3515259273437346	5.3248245538841115	target	0	4	destabilized	1.6723797634253068	0.3515259273437346	3.941659940394348	528	0	184	0.696969696969697	ACTH
ST134_HUMAN	42	3.638144031958993	-7.513517941062395e-4	-1.470199078112541	1.1320696427886854	0.234865193058942	5.324619208613295	target	0	2	destabilized	1.6723411989189492	0.234865193058942	3.638144031958993	529	0	184	0.6956521739130435	ACTH
ATF1_HUMAN	57	2.9509558934392235	3.720713292048123e-4	-1.563144290586413	2.5371974040311325	2.089968990636746	5.251475513313362	target	1	0	stabilized	1.658509087271262	2.089968990636746	2.9509558934392235	540	0	194	0.7185185185185186	ACTH
PBDC1_HUMAN	37	2.882964953305992	8.135825446781896e-4	-2.231262880708271	3.3238783359435	2.6056240008272744	5.224889763014009	target	2	0	stabilized	1.6534336996405596	3.713251169641992	2.882964953305992	542	0	195	0.7195571955719557	ACTH
NOG1_HUMAN	42	0.8534913367286522	7.445810367091056e-6	-1.9297255605398898	2.940735615888906	2.3513898095213737	5.221443641188699	target	1	0	stabilized	1.65277392327368	2.3513898095213737	0.8534913367286522	544	0	196	0.7205882352941176	ACTH
RCC1_HUMAN	37	-0.8981221756836497	9.558944663100102e-5	-2.023523165786198	3.0240175185252705	2.3769813475277375	5.213773993730699	target	4	0	stabilized	1.6513039685286324	4.771204893345481	3.095811515749179	545	0	196	0.7192660550458716	ACTH
RS21_HUMAN	57	2.8614912272364204	5.73349774756284e-4	-2.6233468933313455	3.861522381674357	3.150723376059618	5.102100312685892	target	4	0	stabilized	1.6296522809700624	4.740157204326812	1.1057183102895645	564	0	214	0.7588652482269503	ACTH
QTRT2_HUMAN	47	0.08239704465731007	1.1795019919746228e-4	-2.0127834202092174	3.0420634363721835	2.451114217289544	3.6263714346070994	target	2	0	stabilized	1.6291243539036135	2.451114217289544	0.08239704465731007	565	0	214	0.7575221238938054	ACTH
PPIL3_HUMAN	42	-0.550441713699638	-0.009265292409085154	-0.736691860950438	1.0066010211098688	0.6007746939720767	5.079836454329131	target	0	1	destabilized	1.625279067042453	0.6007746939720767	-0.550441713699638	568	0	216	0.7605633802816901	ACTH
NONO_HUMAN	37	-0.30049806004467644	3.333850529222231e-4	-1.7128597585785055	2.7051665280469637	2.0366658551336925	5.072613179238961	target	2	1	stabilized	1.623856104788081	2.0366658551336925	2.161556084168316	569	0	216	0.7592267135325131	ACTH
DESM_HUMAN	62	4.820151647308096	-7.618321378034887	-0.816683633911023	1.0479516928689454	0.10029294427944947	4.927760542594786	target	0	1	destabilized	1.5948846338563885	0.10029294427944947	4.820151647308096	588	0	234	0.7959183673469388	ACTH
BYST_HUMAN	42	3.1762020966422257	7.027817818859045e-4	-1.1025870712942227	2.070076773177683	1.7297119259845746	4.9218799509626585	target	2	0	stabilized	1.5936905613753287	1.7297119259845746	3.1762020966422257	591	0	236	0.7986463620981388	ACTH
NDRG1_HUMAN	57	1.5301868782086354	7.123390152752184e-5	-3.74900778399253	4.727438746809337	3.480369209182625	4.887748671959418	target	5	0	stabilized	1.5867318031904654	6.611984049424339	2.778519979504729	595	0	239	0.8033613445378152	ACTH
I2BP2_HUMAN	67	-14.646923067334896	0.02500958184797966	-2.8609524126445702	3.877276847042335	1.9075765621783325	4.887713670405018	target	5	0	stabilized	1.586724642085819	3.5799042633828417	1.7947852666679511	596	0	239	0.802013422818792	ACTH
HSP7E_HUMAN	47	0.2897539266788989	-2.2890597509797058e-4	-0.9656054905697038	1.006987665190026	0.38070760859322406	4.815343626702197	target	0	1	destabilized	1.5718074085815883	0.38070760859322406	0.2897539266788989	607	0	249	0.8204283360790774	ACTH
NU155_HUMAN	42	3.066614748831287	5.235134393143939e-4	-1.6909408902847496	2.7095778910607002	2.1071793050706424	4.811962828668168	target	3	0	stabilized	1.571105073366921	2.328421240177482	3.066614748831287	608	0	249	0.819078947368421	ACTH
RS7_HUMAN	52	-9.940283582799816	1.753189774512204e-5	-6.085006911084016	7.066036768859692	5.235078338909529	4.789728140670151	target	1	0	stabilized	1.5664736542109428	5.235078338909529	-9.940283582799816	611	0	251	0.8216039279869067	ACTH
DPP3_HUMAN	37	-2.791586785891704	9.557733456163767e-5	-2.900212671012163	3.869509227587211	3.0708924657733925	3.664406866672695	target	4	0	stabilized	1.562573400356543	5.267140726669909	3.447258223678232	613	0	252	0.8221859706362153	ACTH
BRE1B_HUMAN	47	0.9715490616580301	-1.2802762568394236e-4	-1.2288936993400126	1.0119186957022983	0.22167691464971898	4.768688932982606	target	0	2	destabilized	1.5620714103031283	0.22167691464971898	0.9715490616580301	615	0	253	0.8227642276422764	ACTH
MYLK_HUMAN	42	2.0158860337484463	2.0652070151333627e-4	-1.1029035235797742	2.103617525218171	1.7606206903310457	2.7487503382024676	target	3	0	stabilized	1.5608004257308945	1.8569078237485495	2.0158860337484463	617	0	254	0.8233387358184765	ACTH
SYVC_HUMAN	42	3.1553062986318396	4.0712631752023727e-4	-1.1412018977425473	2.149840579308503	1.8663483358107193	4.74579373688568	target	1	0	stabilized	1.5572586966573583	1.8663483358107193	3.1553062986318396	621	0	257	0.8276972624798712	ACTH
CBX1_HUMAN	42	2.384272319182231	-4.375959438382019e-4	-0.6026911383243274	0.9994692921866895	0.5898693488748753	4.740886182020368	target	0	1	destabilized	1.556224076464618	0.5898693488748753	2.384272319182231	622	0	257	0.8263665594855305	ACTH
PGM1_HUMAN	62	3.264831975713768	0.0010524991130051505	-2.578894201368148	3.5205100965653426	2.84275081625975	3.1245099133608094	target	4	0	stabilized	1.553206041304101	2.84275081625975	3.2959257320207405	624	0	258	0.8269230769230769	ACTH
KIF27_HUMAN	67	-1.4717631278626109	-2.528988125712478e-4	-1.7173161339465925	1.0533277680842852	0.14405875746234306	4.675434588903965	target	0	3	destabilized	1.5423221186134808	0.14405875746234306	3.7410154257324906	631	0	264	0.8367670364500792	ACTH
FKBP4_HUMAN	42	-0.2552552235873501	3.6387067763585415e-5	-1.0048576907019395	2.005450427146402	1.6504604642300966	4.669076003911488	target	2	0	stabilized	1.5409611942695631	1.6504604642300966	2.098679677474789	634	0	266	0.8391167192429022	ACTH
RL31_HUMAN	52	0.6176044851503838	0.008893972134750645	-1.6159190189538566	2.6375408630574615	1.9818035851878355	4.638102946835831	target	1	0	stabilized	1.5343054349724783	1.9818035851878355	0.6176044851503838	640	0	271	0.846875	ACTH
CHM1A_HUMAN	47	-1.9685622921889776	6.933976017925367e-5	-1.9522212331336355	2.9761064493424536	2.417548963977633	4.602737109108498	target	2	0	stabilized	1.5266511502578668	5.795690028547923	3.197874133064026	644	0	274	0.8509316770186336	ACTH
COPG2_HUMAN	37	2.612595559583869	6.626433869200031e-4	-13.54118893799281	13.185474092495236	8.369640869528894	4.583751885043171	target	3	0	stabilized	1.5225178516480746	8.369640869528894	2.612595559583869	650	0	279	0.8584615384615385	ACTH
CLCB_HUMAN	42	2.920268016991124	9.298273160491134e-4	-0.9000753162072883	1.9073304692067703	1.5533698958227595	4.563054249834599	target	3	1	stabilized	1.5179921909463858	1.9393139007915166	2.920268016991124	658	0	286	0.8693009118541033	ACTH
METK1_HUMAN	52	3.0823643403882195	5.472158404394729e-4	-1.8626413432074493	2.867686566007876	2.409958040873544	2.3217792396087025	target	5	0	stabilized	1.5082462490876312	2.6970889238502416	3.1294031705454457	670	0	297	0.8865671641791045	ACTH
HPRT_HUMAN	37	2.075480860289351	-3.13726333751394e-4	-0.5792083881986287	1.0011161679984548	0.6162591307271598	4.517207083635278	target	0	2	destabilized	1.507893901013514	0.60680888944118	2.075480860289351	673	0	299	0.888558692421991	ACTH
SRSF5_HUMAN	67	2.003009276832415	-5.549637344643984e-4	-0.9369147342276025	1.0089459481735166	0.44533013490335793	4.5034325524604695	target	1	2	destabilized	1.5048398954359303	0.356147751390381	2.9637337040289995	679	0	304	0.8954344624447718	ACTH
GCP60_HUMAN	37	2.990599167647838	8.267741684029669e-4	-1.5587103027323845	2.571845853183348	2.0828429275159484	4.4928536682374975	target	2	1	stabilized	1.5024880607255744	2.0828429275159484	2.990599167647838	682	0	306	0.8973607038123167	ACTH
PEG10_HUMAN	47	3.103505193445983	2.6135083111908543e-4	-1.7786755122958555	2.7932106045162355	2.3828456621902	2.2351556116956086	target	4	0	stabilized	1.4935330930441895	2.3871500227572335	3.2171819408230724	694	0	317	0.9135446685878963	ACTH
ECHA_HUMAN	42	-0.3257105605908564	4.7167997848174997e-5	-1.129442584555107	2.126036425286813	1.7321167817201606	2.135621558748051	target	5	0	stabilized	1.4907963972721436	2.7100424810736556	1.9747165534772038	701	0	323	0.9215406562054208	ACTH
RANDOM5399	37	2.9230324267459684	9.338115961025739e-4	-0.6742244597320408	1.722651437252274	1.5179883047577487	3.4960695015127805	target	3	0	stabilized	1.486835567210368	2.112601171964697	2.9230324267459684	704	0	325	0.9232954545454546	ACTH
FKBP5_HUMAN	42	3.041723535250583	4.3879124190295877e-4	-1.878836565298079	2.894469041437176	2.298521212084679	2.8844784438177657	target	6	0	stabilized	1.4819412121766196	9.884130166686075	3.041723535250583	711	0	331	0.9310829817158931	ACTH
ADHX_HUMAN	62	-0.07980412415486461	1.630440497195972e-4	-0.8382335770589668	1.8387917911318883	1.5770177364585152	4.3887460148935435	target	1	0	stabilized	1.4790435404724183	1.5770177364585152	-0.07980412415486461	713	0	332	0.9312762973352033	ACTH
TOLIP_HUMAN	52	1.3935822342002635	2.033973769468358e-4	-0.8697625278183012	1.8714642016604819	1.5910257529395064	3.442868408565889	target	2	0	stabilized	1.4755974626839534	1.775193895842463	1.3935822342002635	716	0	334	0.9329608938547486	ACTH
TCPB_HUMAN	37	3.232922646284682	0.0010669273820254597	-1.16631942898971	2.1670292491542273	1.7604347244759548	4.372796816559576	target	3	1	stabilized	1.4754028081817911	2.972434464873732	3.232922646284682	717	0	334	0.9316596931659693	ACTH
DLGP5_HUMAN	42	2.816589902668321	8.368302912086914e-4	-1.6860557451107214	2.7095969474897923	2.113589660702063	4.332733143741709	target	1	0	stabilized	1.4661985539103088	2.113589660702063	2.816589902668321	724	0	340	0.9392265193370166	ACTH
RBP56_HUMAN	57	3.319802444927825	-7.708594690828086	0.8597748395089274	0.8098633026308267	0.6053532092191264	2.3894977189341473	target	0	3	destabilized	1.463315476748299	0.31914183880003816	3.316180068155573	728	0	343	0.9423076923076923	ACTH
AL1A1_HUMAN	42	3.387964923980508	7.8490373438562635	1.205378887622067	0.1813786963590301	1.8410404597364907	2.396664674905253	target	2	0	stabilized	1.4612508854651152	2.2226595631275554	3.387964923980508	730	0	344	0.9424657534246575	ACTH
SNX6_HUMAN	37	0.7274384886603972	3.0744039365651624e-5	-2.7349591970254785	3.7402157191925065	2.7773159965179546	4.287848419029056	target	2	1	stabilized	1.4557850731038078	2.7773159965179546	0.7274384886603972	736	0	349	0.9483695652173914	ACTH
SPEE_HUMAN	57	1.8105245753324721	0.05008377522402592	-2.5963171649596335	3.6223341381092604	2.674034244859257	4.2726700572469385	target	2	0	stabilized	1.4522389379649303	4.721333102090043	1.8105245753324721	739	0	351	0.9499323410013532	ACTH
ARGI2_HUMAN	52	0.2394404144324831	2.2531005499834835e-4	-1.6412394607232623	2.6385247394580675	2.1046678591499046	4.270726140070817	target	2	0	stabilized	1.4517838690052867	3.1012620503288555	3.8635436943479036	740	0	351	0.9486486486486486	ACTH
T2FA_HUMAN	52	2.5352383518294337	3.3660815432938853e-4	-2.7396249281401195	3.751375623340655	3.019419739511158	4.267898820281308	target	2	0	stabilized	1.4511216265702418	3.019419739511158	2.5352383518294337	741	0	351	0.9473684210526315	ACTH
AN32B_HUMAN	67	0.10536315748276243	-1.5778837367358842e-4	-1.3046827341084821	0.9971407465757416	0.11886049384062632	4.251627651974108	target	0	1	destabilized	1.4473018865544618	0.11886049384062632	0.10536315748276243	746	0	355	0.9517426273458445	ACTH
HEXB_HUMAN	67	-0.013570711908403069	-0.0837570394828296	-1.5128389319294295	0.9999350903610339	0.374467582384305	4.248969540336022	target	0	1	destabilized	1.446676492440475	0.374467582384305	-0.013570711908403069	747	0	355	0.9504685408299867	ACTH
DNM1L_HUMAN	37	-0.2723409154327206	1.5164918971825013e-4	-3.6889952165100333	4.691676346727066	3.6531493092575715	4.242665482722681	target	2	0	stabilized	1.4451917233107723	3.6531493092575715	3.0972525248102007	751	0	358	0.9533954727030626	ACTH
SAR1A_HUMAN	42	3.037863543788063	3.1989481104857285e-4	-3.2419098912309052	4.2551658731804025	3.439153289594324	2.3560754969512114	target	3	0	stabilized	1.437997803062859	3.439153289594324	3.037863543788063	760	0	366	0.9631578947368421	ACTH
BCCIP_HUMAN	37	2.856885162133742	0.0011009243405713945	-3.2172391941004546	4.214836100698385	3.0800457862796766	4.200310015631168	target	2	0	stabilized	1.4351583358107753	3.0800457862796766	2.856885162133742	762	0	367	0.963254593175853	ACTH
NOSIP_HUMAN	42	-58.76039859048208	0.023395570746532802	-26.4874461734556	27.487423126905128	2.1613473949280766	4.188025426902887	target	1	0	stabilized	1.4322293643611317	2.1613473949280766	-58.76039859048208	768	0	372	0.96875	ACTH
ZN207_HUMAN	57	3.0265738705736953	6.608403662316715e-4	-1.4710938911585376	2.4716826840126553	1.9639986198849206	4.180905186696562	target	2	1	stabilized	1.4305277749339822	1.9639986198849206	3.0265738705736953	769	0	372	0.9674902470741222	ACTH
SH3L3_HUMAN	67	0.5406261750868331	1.889518673332153e-4	-2.699848385047682	3.7004389014923524	2.9209326201242334	4.179998767528688	target	3	0	stabilized	1.4303109516870254	2.9209326201242334	3.1265647870947575	771	0	373	0.9675745784695201	ACTH
TRIP6_HUMAN	52	1.4577418357727454	5.027367269376574e-5	-2.141486167284344	3.162139204290118	2.529996820677069	4.169360084809066	target	1	0	stabilized	1.4277625671546783	2.529996820677069	1.4577418357727454	775	0	376	0.9703225806451613	ACTH
RED_HUMAN	42	2.387934279716185	1.6365882034959675e-4	-1.7632680122747266	2.7862766637011673	2.2281526754980456	4.15944619142928	target	1	0	stabilized	1.4253819383507091	2.2281526754980456	2.387934279716185	780	0	380	0.9743589743589743	ACTH
G6PD_HUMAN	37	2.1556117868482163	7.23518094118379e-5	-2.180420680841284	3.0922176605587337	2.5040955816829658	4.137422283283291	target	6	0	stabilized	1.4200729570302837	2.5040955816829658	2.1556117868482163	788	0	387	0.9822335025380711	ACTH
MOC2B_HUMAN	52	-1.7223821369584362	4.854527761253341e-5	-1.439849826557218	2.4363716272886435	1.904054887361422	4.132616614473948	target	1	0	stabilized	1.4189107691833662	1.904054887361422	-1.7223821369584362	791	0	389	0.9835651074589128	ACTH
BGLR_HUMAN	57	3.3077007562763727	-7.709619821340354	0.9645611073439929	0.7863860137805584	0.5733373702250507	2.194910104723307	target	0	3	destabilized	1.4186656390554315	0.49252890308743547	3.267114833624864	792	0	389	0.9823232323232324	ACTH
STRN_HUMAN	42	3.0025127373331384	2.2521027448458024e-4	-0.9321126707467762	1.9340095456494657	1.7138809072160774	4.115316036354872	target	2	0	stabilized	1.414715632238275	1.8398397641247142	3.0025127373331384	794	0	390	0.982367758186398	ACTH
JMJD6_HUMAN	42	1.262739237487388	1.226917714934089e-4	-1.8830884600891338	2.8854990783862813	2.3052039809653935	4.08954845457578	target	1	0	stabilized	1.4084345616557172	2.3052039809653935	1.262739237487388	802	0	397	0.9900249376558603	ACTH
PFD2_HUMAN	47	-6.999659807975783	7.05837089186236e-5	-0.905093003689313	1.9098072933452914	1.6073570197380065	4.088771057397168	target	1	0	stabilized	1.408244449939046	1.6073570197380065	-6.999659807975783	803	0	397	0.9887920298879203	ACTH
CC171_HUMAN	57	2.7378211701501747	3.1592143686225924e-4	-1.4923338530417298	2.512172252445727	2.0225063854233944	4.049464400025795	target	3	0	stabilized	1.3985846254658434	3.9502402458944026	2.8621390752869225	815	0	408	1	ACTH
XPO1_HUMAN	37	3.0477986843484497	4.010308555514824e-4	-12.482936639912808	13.880102349604586	12.18915104257722	4.041963942642022	target	2	0	stabilized	1.396730698269206	12.18915104257722	3.0477986843484497	823	0	415	1	ACTH
AL1B1_HUMAN	37	2.787953753948694	2.613807849091092e-4	-1.9206807498831844	2.9335095641589417	2.3561124207623014	4.020620771076991	target	1	0	stabilized	1.391436311375204	2.3561124207623014	2.787953753948694	830	0	421	1	ACTH
PP1B_HUMAN	37	1.519573011768379	0.025580976834940115	-2.191112740633689	3.191468008913186	2.3415512977021726	4.0102388823083235	target	1	0	stabilized	1.3888508111921187	2.3415512977021726	1.519573011768379	831	0	421	1	ACTH
LSM3_HUMAN	52	2.3776380694074306	4.530790191302574e-5	-1.691327706887944	2.691243062977775	2.1992844769754196	4.007012878018437	target	2	0	stabilized	1.3880460455291617	4.30640504898932	2.4895363472718444	834	0	423	1	ACTH
ZN395_HUMAN	52	3.3726719300475954	7.307930760743281	0.8812286585341759	0.40125783282693195	1.6613446394632683	2.060821682350359	target	5	0	stabilized	1.3836777732770102	3.189583012105316	3.300031139556401	838	0	426	1	ACTH
GAL3A_HUMAN	37	2.707787801620504	-2.418512373155184e-4	-0.6727581601790495	1.001499321012483	0.5587068224189757	3.93794863472698	target	0	1	destabilized	1.3706599366394796	0.5587068224189757	2.707787801620504	858	0	445	1	ACTH
NUDC3_HUMAN	47	-8.891885957233283	-3.891262753406546e-5	-0.9628489658105567	1.0067838972290075	0.38849929060244465	3.9356607015368725	target	0	1	destabilized	1.370078771596412	0.38849929060244465	-8.891885957233283	859	0	445	1	ACTH
PCBP2_HUMAN	42	-4.746771674425692	0.0062935463547555475	-0.7937603389181189	1.7939218513521495	1.523181781907973	3.929112649139922	target	2	1	stabilized	1.3684136113640704	2.1213898799283077	3.2291136552585002	864	0	449	1	ACTH
U2AF1_HUMAN	52	2.0015750258479867	3.243627284745847e-4	-1.7028008096198195	2.7078549864643593	2.242070282454843	3.898217287491978	target	1	0	stabilized	1.3605193428596223	2.242070282454843	2.0015750258479867	877	0	461	1	ACTH
ODPA_HUMAN	37	2.8623957904055977	4.247968666551224e-5	-1.1973052384493377	2.173490080813207	1.8481185597877405	3.891504050920537	target	4	0	stabilized	1.3587957283831105	2.1006271141759276	2.8623957904055977	884	0	467	1	ACTH
ATX10_HUMAN	57	2.3183038539125245	4.0737530877891495e-4	-1.6738415605659887	2.654684755129438	2.1028983069651206	3.862123440895414	target	5	0	stabilized	1.351217146440991	5.382965639410815	2.361206642978083	898	0	480	1	ACTH
HEAT3_HUMAN	42	3.1004747369100687	5.672716139793723e-4	-1.0918802699327488	2.0980686749860973	1.7460392286703732	3.853939530393418	target	2	0	stabilized	1.3490958797791561	1.9584848054944817	3.1004747369100687	901	0	482	1	ACTH
ARF6_HUMAN	42	2.884335313594175	5.395071986879201e-4	-1.0093607050547724	1.9984153005298892	1.6795598364006123	3.8236938384006165	target	1	0	stabilized	1.3412169288041722	1.6795598364006123	2.884335313594175	922	0	502	1	ACTH
CLPP_HUMAN	37	-0.916236854970873	-1.7424646051666777e-4	-0.6103272117349674	1.0011346779416264	0.5929607710537457	3.7994467627984236	target	0	1	destabilized	1.3348554673960142	0.5929607710537457	-0.916236854970873	930	0	509	1	ACTH
CETN2_HUMAN	67	3.1681676109033945	7.282791907694074e-4	-1.2949696259156642	2.293825655999669	1.9372877783833424	3.7267148595875828	target	1	0	stabilized	1.3155271108860274	1.9372877783833424	3.1681676109033945	951	0	529	1	ACTH
IF1AX_HUMAN	62	2.0595982306664538	2.5797478281067756e-4	-3.99126468589051	5.0008141047368255	3.844133897469102	3.7251612069128197	target	2	0	stabilized	1.3151101279186752	3.844133897469102	3.1838729271866786	953	0	530	1	ACTH
PSD13_HUMAN	52	2.070121632797547	1.9609621329781616e-4	-1.195554940531755	2.157229221501485	1.8584392298983494	1.9425545661480117	target	3	0	stabilized	1.312570318744244	6.792733814724013	2.5988535710594016	960	0	536	1	ACTH
HNRPF_HUMAN	62	1.8806727532491387	-2.6614354043989655e-4	-1.222659494382261	1.007211398085806	0.14908159095047369	2.3727094910942967	target	0	3	destabilized	1.305792512017883	0.14908159095047369	3.285586710438232	970	0	545	1	ACTH
PP6R3_HUMAN	42	-0.23640473526754188	0.07120403141919074	-2.599291399435854	3.615772847056382	2.150544627790526	2.8681762648034383	target	2	0	stabilized	1.30369666431014	2.150544627790526	3.2127951803074075	977	0	551	1	ACTH
RINI_HUMAN	37	2.9926980339667484	6.621739750123229e-4	-3.1964433429541526	4.197131449048527	3.504353439331585	3.673372914305411	target	2	0	stabilized	1.3011102902178653	3.504353439331585	2.9926980339667484	981	0	554	1	ACTH
AK1A1_HUMAN	42	3.2077186056684317	2.308848037698738e-4	-0.7458872169440971	1.7457716082724617	1.5873926540894219	3.666903613889983	target	2	1	stabilized	1.2993476040123466	1.749473424685944	3.2077186056684317	986	0	558	1	ACTH
PSMD8_HUMAN	37	3.0035324024336814	0.0012036381156178772	-2.519704142484638	3.5302750079226155	2.7655994415526766	3.647363139092559	target	1	0	stabilized	1.2940044788719274	2.7655994415526766	3.0035324024336814	995	0	566	1	ACTH
TCPA_HUMAN	62	-1.4554947599489987	-1.0556234000188511e-5	-0.6840816060056469	1.0003275234573483	0.5270303301352572	3.6317232928251797	target	0	2	destabilized	1.289707271940603	0.4311050759521008	3.33961204772435	1002	0	572	1	ACTH
CHM4A_HUMAN	37	4.514380734876526	-6.101158067239407e-4	-0.6804300806657326	0.9995845594468049	0.5665932267685467	3.6067950554718187	target	0	1	destabilized	1.2828195817520844	0.5665932267685467	4.514380734876526	1011	0	580	1	ACTH
CYC_HUMAN	42	3.254731118561802	-3.5499598223004284e-4	-0.890908711383693	1.0040330039342649	0.40160543247490443	3.0080622206164698	target	0	2	destabilized	1.2818927649678176	0.40160543247490443	3.254731118561802	1012	0	580	1	ACTH
KDM7A_HUMAN	37	-2.1898642661631205	-3.0879484214381035e-5	-0.6872261222528877	1.0163028839679125	0.5462457388818169	2.394223651591606	target	0	2	destabilized	1.273201584315617	0.4796239368645717	2.0605098390453134	1030	0	597	1	ACTH
IF4E_HUMAN	42	2.34291568350603	1.6107056328785603e-4	-0.8899683689912881	1.9009367731064777	1.601756353708927	3.560777599058708	target	1	0	stabilized	1.2699789477141845	1.601756353708927	2.34291568350603	1032	0	598	1	ACTH
GRP75_HUMAN	57	2.6607101348955857	5.111682222079675e-4	-1.020069292964891	2.0216863943528205	1.7615461236622407	2.695291009914947	target	3	1	stabilized	1.2698821443295034	2.6279785502628887	3.244668930194632	1033	0	598	1	ACTH
PCH2_HUMAN	42	-6.668213632076845	6.942952078492699e-5	-0.7375835394665107	1.7386354937749031	1.5171563153846728	3.535844971871353	target	4	0	stabilized	1.2629523010177104	5.225269804352327	2.236930311333468	1044	0	608	1	ACTH
OSBP1_HUMAN	47	2.788001438353385	4.833330311122989e-4	-1.0945501718031136	2.107367103479492	1.8020825280298765	3.2387278656931118	target	2	0	stabilized	1.2546699691120147	1.8421639220924406	2.788001438353385	1053	0	616	1	ACTH
FRDA_HUMAN	37	4.15149096954226	-6.570517287905918e-4	-0.7384173622755691	0.8672286117050879	0.33647203965726774	3.5026131174083406	target	0	1	destabilized	1.2535092948983324	0.33647203965726774	4.15149096954226	1055	0	617	1	ACTH
THUM1_HUMAN	57	2.6024261225654852	2.60096998165346e-4	-1.0266051488417614	2.0366052231620038	1.7037456122517556	3.494560771575026	target	1	0	stabilized	1.2512076944191228	1.7037456122517556	2.6024261225654852	1060	0	621	1	ACTH
PDXK_HUMAN	57	2.887803048780789	5.42157467303934e-4	-3.3721161044146313	4.391404400831979	3.388731383411293	3.489080321671483	target	1	0	stabilized	1.2496381833416215	3.388731383411293	2.887803048780789	1063	0	623	1	ACTH
NNRE_HUMAN	37	-4.987593032818861	-1.9801100598708745e-5	-0.7500251105785909	1.0191765517886509	0.47900283062786214	3.4822368378117	target	0	4	destabilized	1.2476748567846754	0.19493278842862047	3.229054834680753	1066	0	625	1	ACTH
PUR9_HUMAN	52	-2.640963159656588	6.923621093757344e-5	-1.7480655467831046	2.74988000886493	2.2974975180990866	3.471316332956663	target	1	0	stabilized	1.2445338686983998	2.2974975180990866	-2.640963159656588	1070	0	628	1	ACTH
KAD3_HUMAN	57	2.0025354460253477	-1.2147180700952532e-4	-0.5524526173838468	0.9980849941597048	0.5764992872033327	3.4706558594916466	target	0	1	destabilized	1.2443435845979454	0.5764992872033327	2.0025354460253477	1071	0	628	1	ACTH
2A5G_HUMAN	57	-0.8028042981653409	-1.5155392665276143e-4	-1.0918736981393766	1.0120692068272512	0.23180498641163202	3.434765780500472	target	0	1	destabilized	1.233948737177906	0.23180498641163202	-0.8028042981653409	1089	0	645	1	ACTH
PUF60_HUMAN	47	1.4032490947659066	-1.5212806880703382e-4	-0.6883141112835434	1.0001441737320664	0.5388536688834005	3.42896185192074	target	0	2	destabilized	1.2322575482864226	0.4205214785920516	1.4032490947659066	1090	0	645	1	ACTH
PGAM4_HUMAN	42	2.988812221471296	0.0010524374234455029	-3.728469027199667	4.733736393351487	3.6420089415520587	3.41742835434153	target	5	0	stabilized	1.2288883250484526	12.016406201279468	0.3312123982188698	1100	0	654	1	ACTH
CSN2_HUMAN	37	2.761334061257379	5.054232720262213e-4	-0.9554178029460036	1.9558459793818057	1.6657059578061566	3.4108830483094175	target	1	0	stabilized	1.2269712162199833	1.6657059578061566	2.761334061257379	1107	0	660	1	ACTH
FHL3_HUMAN	37	-2.8512566032390456	-0.06646210621134054	-2.3549370346044656	1.0245307249016973	0.344462516968578	3.4046938950713344	target	0	2	destabilized	1.225155036902885	0.344462516968578	3.297939832391944	1110	0	662	1	ACTH
RAD50_HUMAN	37	3.4338827713258753	7.526515699356148	0.7228550694729603	0.5835501105872543	1.5685182115629017	2.0151890346753274	target	5	0	stabilized	1.2225115689088146	3.666049417751953	3.4338827713258753	1112	0	663	1	ACTH
CDK5_HUMAN	47	1.8735467019969931	-1.9194437823049626e-4	-0.6374116307483985	1.0004948306446957	0.5656279154094429	3.103092424955817	target	0	2	destabilized	1.22116042204333	0.5656279154094429	1.8735467019969931	1116	0	666	1	ACTH
BT3L4_HUMAN	42	3.8642891304508784	-7.166126262746011e-4	-0.8037265033587611	1.0001638990318373	0.42767695975127845	3.3837813061984447	target	1	2	destabilized	1.2189938138277554	0.42767695975127845	3.8642891304508784	1120	0	669	1	ACTH
ATPD_HUMAN	67	3.4280384317980808	6.981051815660565	0.7333885746481131	0.44716590276179546	1.5524923841957912	3.379754475795035	target	1	0	stabilized	1.2178030665591664	1.5524923841957912	3.4280384317980808	1124	0	672	1	ACTH
PRS6A_HUMAN	57	2.8920957205842477	6.992628034732488e-4	-0.8054427479587642	1.8128478593778776	1.5388733056701658	3.3031888397181053	target	2	0	stabilized	1.1948883169566762	1.5956123961209228	2.8920957205842477	1169	0	716	1	ACTH
XPP3_HUMAN	57	2.8120652726404214	6.62535807463415e-4	-0.8865197641338627	1.8873260469611	1.5992793885694696	3.2817367399217767	target	1	0	stabilized	1.1883727761422231	1.5992793885694696	2.8120652726404214	1183	0	729	1	ACTH
RS15_HUMAN	42	3.0493148346319177	1.4342895817699507e-4	-1.5159430035398536	2.5198452907264204	2.1401677309661027	2.532684404024536	target	3	0	stabilized	1.1874715397226636	4.370973540151293	3.0493148346319177	1188	0	733	1	ACTH
CDN2A_HUMAN	37	0.11354393703550196	4.285097774965951e-5	-0.9855636625972737	1.9862746179456336	1.6866324118265614	2.5103598365405535	target	5	0	stabilized	1.1804484918361433	2.209888939079009	0.11354393703550196	1207	0	751	1	ACTH
UBQL1_HUMAN	37	2.6590731179871634	-2.452670935510521e-4	-0.8488347314878344	1.0050765975779594	0.48352987291138827	3.2511673657953017	target	0	1	destabilized	1.179014121324027	0.48352987291138827	2.6590731179871634	1211	0	754	1	ACTH
TF2AA_HUMAN	57	2.7752012758795725	7.149250496372139e-4	-1.5076270355645802	2.5186138878411373	2.0564372324005147	3.2239652629056246	target	4	1	stabilized	1.1706120500533412	2.2790134525562653	3.3672104670759095	1224	0	766	1	ACTH
PICAL_HUMAN	42	2.093623857426892	1.8082280812960476e-4	-1.272472302750269	2.2801645995880118	1.831999463234105	3.216864694460705	target	3	0	stabilized	1.1684071878326372	2.338105699189013	2.093623857426892	1230	0	771	1	ACTH
YTDC2_HUMAN	37	2.896129750208951	5.809661924759894e-4	-1.7287066666648985	2.753507560301757	2.2348812270443457	3.2041320999282163	target	1	0	stabilized	1.164441258046647	2.2348812270443457	2.896129750208951	1241	0	781	1	ACTH
CARM1_HUMAN	47	3.1321760233446048	2.0878234255831951e-4	-1.0499700279107123	2.0492455217346386	1.6754455267805752	2.8717688313935383	target	4	0	stabilized	1.1644276656359263	2.941146915215198	3.4078862174324134	1242	0	781	1	ACTH
LIPB1_HUMAN	67	3.0207161040644706	5.13025168695478e-4	-3.2586534670578	4.263674094236058	3.503765598978944	3.203706542086857	target	2	1	stabilized	1.1643084339024201	3.635352021771191	1.0561935258623305	1243	0	781	1	ACTH
SYHC_HUMAN	57	3.3225615659758128	-11.147202365988756	0.909931790533477	0.8302326579250592	0.5436651699129105	3.1777719003759177	target	1	2	destabilized	1.1561802909558232	0.43788692922176914	3.3225615659758128	1263	0	800	1	ACTH
ENOB_HUMAN	57	2.288424614220195	1.5864993718913515e-4	-3.3388511454798904	4.36191261369969	3.4500277761383513	3.147141745608605	target	2	1	stabilized	1.1464946585705074	3.4500277761383513	2.288424614220195	1278	0	814	1	ACTH
2AAA_HUMAN	57	1.8214276952777548	0.09448259872084824	-1.0296840169688306	2.0330424135892726	1.589607897098814	3.1467279285646823	target	2	1	stabilized	1.1463631601233064	4.518431865330398	2.5241402953054615	1279	0	814	1	ACTH
PSMD6_HUMAN	57	3.1991299503735173	0.0011091363777174556	-0.9104829924034015	1.9403587122344745	1.723927470682948	3.145853500925062	target	1	0	stabilized	1.1460852367765697	1.723927470682948	3.1991299503735173	1283	0	817	1	ACTH
GLYC_HUMAN	37	1.672457140336904	-2.96636510666978e-4	-0.6576256406208063	1.0130991437292236	0.5397924694186008	3.14295364895509	target	0	1	destabilized	1.1451630103172785	0.5397924694186008	1.672457140336904	1289	0	822	1	ACTH
DOPD_HUMAN	67	2.852834925586579	-1.381970646951394e-4	-0.9629286086480239	0.956212368829247	0.28031017962614796	3.1298490843694973	target	0	3	destabilized	1.1409847875332495	0.28031017962614796	3.0961930513534965	1301	0	833	1	ACTH
IPO9_HUMAN	37	2.403429240291015	1.6367329486962376e-4	-1.3641534970795697	2.366367281294478	1.964037025717775	3.1253451280596907	target	1	0	stabilized	1.13954471806931	1.964037025717775	2.403429240291015	1308	0	839	1	ACTH
HDDC2_HUMAN	62	-2.1029005203915916	6.654700687211984e-5	-2.855769352331066	3.8611056883843795	3.2056453788013473	3.119311268416299	target	1	0	stabilized	1.1376122301506508	3.2056453788013473	-2.1029005203915916	1313	0	843	1	ACTH
ECI1_HUMAN	67	-2.1570476898460913	-7.720479361362431e-5	-0.5521984579923348	0.9994212200025706	0.5807318811692008	3.1074192941642798	target	0	1	destabilized	1.1337925727587206	0.5807318811692008	-2.1570476898460913	1324	0	853	1	ACTH
SART3_HUMAN	52	3.4503139871407513	7.434481702644125	0.7693543401087981	0.40918544397700113	1.5511901033813214	3.09948117802731	target	2	0	stabilized	1.1312347355578565	1.6956934650933748	3.4503139871407513	1328	0	856	1	ACTH
KAP2_HUMAN	47	1.2239151372932378	-2.6415749333855046e-4	-0.6034811551810946	1.002540898614446	0.5640015134217976	3.096624768054951	target	0	2	destabilized	1.1303127338362702	0.32713115451409586	1.2239151372932378	1330	0	857	1	ACTH
CNGA1_HUMAN	47	3.3521078603833563	2.227455934870331e-4	-1.3960696761756544	2.3865368301234726	2.1412545248297374	3.088477283146184	target	2	0	stabilized	1.1276781808236043	2.5252361360584348	3.3521078603833563	1336	0	862	1	ACTH
EI2BB_HUMAN	47	0.33792842937872963	3.852611138576829e-5	-1.9921372574954712	2.9667229760614067	2.608934099138721	2.1707115775604433	target	3	1	stabilized	1.1243242385031578	2.608934099138721	2.3068286618359912	1342	0	867	1	ACTH
CC124_HUMAN	37	2.097120059897655	2.3546435814526728e-4	-2.531275221737945	3.531937624628059	2.997942295577219	3.0452648832307703	target	1	0	stabilized	1.113587886945243	2.997942295577219	2.097120059897655	1362	0	886	1	ACTH
IF2B2_HUMAN	42	1.1028854078817254	0.07734410195476225	-1.5071930602001615	2.510689028159684	1.789299562144682	3.039904355464039	target	1	0	stabilized	1.1118260529047825	1.789299562144682	1.1028854078817254	1363	0	886	1	ACTH
C8AP2_HUMAN	52	2.7117377914178693	2.1232797811569068e-4	-3.0664229436090134	4.177132564646691	3.097770062878461	3.0366651311891757	target	2	0	stabilized	1.1107599169579134	5.30588794164717	0.9724747690620488	1366	0	888	1	ACTH
IMA1_HUMAN	42	3.5805951328529115	5.49803894356265e-4	-1.8271173881099854	2.8323108662438656	2.555891923811391	3.0323270895276773	target	2	0	stabilized	1.1093303410934099	4.222045543846101	3.5805951328529115	1368	0	889	1	ACTH
ALDR_HUMAN	37	1.738280160963835	1.9749453431964302e-4	-1.9171541876293634	2.915469464957188	2.3558160201502765	3.020390757957568	target	2	0	stabilized	1.1053862130687824	2.3558160201502765	1.738280160963835	1381	0	901	1	ACTH
GCYA2_HUMAN	47	3.356643687976885	7.245292695207618	1.1823209915097066	0.08935177061776738	1.6116819559436548	2.9863937715117572	target	1	0	stabilized	1.094066562998515	1.6116819559436548	3.356643687976885	1413	0	932	1	ACTH
UBQL4_HUMAN	67	3.4414977397576028	-9.199866370058539	0.7258299478010152	0.7497066406084828	0.4971988835810517	2.9785065832198647	target	0	3	destabilized	1.0914220283308855	0.48013451625894354	3.5014476631372617	1420	0	938	1	ACTH
RPAB1_HUMAN	42	-0.31275798531799665	0.1162984376019242	-2.819440735738081	3.8243756948120686	1.967362264908859	2.18103767770055	target	2	0	stabilized	1.0907599590396022	2.937866535971354	2.277024672547075	1422	0	939	1	ACTH
CLU_HUMAN	42	1.667022755090366	1.5197415304511077e-4	-0.772051455189734	1.7759929667106547	1.6446084310079916	2.4417173610394016	target	3	1	stabilized	1.084622699252935	1.7241964093524265	2.646548441303191	1433	0	949	1	ACTH
KCD16_HUMAN	57	2.9109021104856474	5.245123316671694e-4	-3.6752798701923775	4.710864042531837	3.6645401948168725	2.9552387225128416	target	5	1	stabilized	1.083579433555404	4.313650435419737	2.321757552280478	1436	0	951	1	ACTH
PDIA4_HUMAN	57	-2.2879268918461513	-8.738038309852909e-5	-0.6394037814529274	1.0006590384953733	0.536220784884416	2.9322865320764993	target	0	1	destabilized	1.0757825050600878	0.536220784884416	-2.2879268918461513	1457	0	971	1	ACTH
PLSI_HUMAN	57	0.9109873357062679	-3.7190380715572635e-4	-1.2826453803715403	1.0492181393225697	0.3460172619324639	2.9321744020601246	target	0	1	destabilized	1.0757442645405761	0.3460172619324639	0.9109873357062679	1458	0	971	1	ACTH
VPS8_HUMAN	67	0.13199484788812194	8.852970848246865e-5	-1.4678892696140722	2.4672519588541384	2.169104337074988	2.9288280538722358	target	3	0	stabilized	1.0746023614014222	2.299817225994273	3.953845214951879	1459	0	971	1	ACTH
PPM1G_HUMAN	57	3.3887917516285664	-0.001127245198035178	-0.5007413211900302	1.0042461349451632	0.6647000093655882	2.100894031124742	target	0	2	destabilized	1.0725570336023287	0.6395716733856407	3.3887917516285664	1463	0	974	1	ACTH
CSTFT_HUMAN	67	2.0977093482821987	0.04676117673553373	-2.4042237561384514	3.4052976592201163	2.6075113192748804	2.922760798459042	target	3	1	stabilized	1.0725286485208527	7.422964302232124	4.32819231492097	1464	0	974	1	ACTH
SYDC_HUMAN	57	3.9749479680257664	7.4193935584183395	0.611431516097427	0.557001026428637	1.5573127809514535	2.9086560502076404	target	2	0	stabilized	1.067691136086574	4.544392420777751	2.5813185552704367	1473	0	982	1	ACTH
EFHD2_HUMAN	47	3.5462086286151457	6.627905239399672	0.8855419955062043	0.49398411245752105	1.9398337341133105	1.7299430503008713	target	7	0	stabilized	1.067631053176966	4.305531913496253	3.3850754487164023	1474	0	982	1	ACTH
MK03_HUMAN	47	2.6781450006157685	2.7493415251318644e-4	-1.1509187868077266	2.1512723534913643	1.8033185488358545	2.904071245747157	target	1	0	stabilized	1.0661136303210936	1.8033185488358545	2.6781450006157685	1481	0	988	1	ACTH
RUXE_HUMAN	47	2.1830738907905656	2.489060229804098e-4	-3.7850193004654638	4.781217345414331	3.7845221613162887	2.0803958864361145	target	4	0	stabilized	1.0596426140800248	3.7845221613162887	3.6727487581547624	1492	0	998	1	ACTH
NXN_HUMAN	42	0.9236312764387861	1.5311835054538084e-5	-1.5811367215100278	2.582143277411375	2.1490839433605737	2.182538837888301	target	2	0	stabilized	1.039763954892285	2.1490839433605737	0.9236312764387861	1530	0	1035	1	ACTH
DUT_HUMAN	42	1.894321108734653	2.534376620342736e-4	-1.6083775467305363	2.545537641872853	2.1028708970446375	2.8176530976773178	target	3	0	stabilized	1.035904303584127	2.16854706087948	1.894321108734653	1540	0	1044	1	ACTH
SPSB1_HUMAN	67	-3.5264005135282748	-7.0367433573291e-5	-0.7734847558576341	0.8570450691749576	0.1601124343974869	2.810725509774852	target	0	1	destabilized	1.0334426385527071	0.1601124343974869	-3.5264005135282748	1547	0	1050	1	ACTH
PSA5_HUMAN	37	0.01267657190521456	-7.758901311829168e-5	-0.573807726088275	1.0082480771923839	0.5692706643489435	2.804267194248524	target	0	2	destabilized	1.031142255020707	0.5692706643489435	0.01267657190521456	1552	0	1054	1	ACTH
KT3K_HUMAN	37	1.0139858571858966	-2.5566887499515155e-4	-0.6552339817489973	1.0027195410326522	0.5545564687549372	2.7939632846724005	target	0	1	destabilized	1.0274611199726242	0.5545564687549372	1.0139858571858966	1561	0	1062	1	ACTH
CANB1_HUMAN	67	2.8226759714792076	0.0396148663530783	-3.0830444069017195	4.1203956782935105	3.4301971054364646	2.7711320616649924	target	5	0	stabilized	1.0192559232313152	3.4301971054364646	3.5455878926968887	1577	0	1077	1	ACTH
ARF4_HUMAN	57	3.4198859386581555	7.794173732503377	0.9458699955303455	0.3605533811414402	1.7373621971769702	2.7672504387868715	target	1	0	stabilized	1.017854205847816	1.7373621971769702	3.4198859386581555	1581	0	1080	1	ACTH
UCHL5_HUMAN	37	2.783545454487616	1.3572302406371305e-4	-1.2439576523325402	2.2664773642180247	1.8318069175856178	2.7644515647306314	target	2	1	stabilized	1.0168422661976675	1.8318069175856178	2.783545454487616	1587	0	1085	1	ACTH
NRDC_HUMAN	47	3.2206820009814727	2.86825083573313e-4	-0.9450278614360106	1.954504496924856	1.8011956556047966	2.1565960109340034	target	2	0	stabilized	1.0139789389608167	1.8187230141244242	1.8357130015366703	1594	0	1091	1	ACTH
CISY_HUMAN	37	1.6662019750644164	2.1480681692484773e-4	-1.1683380147329292	2.1763807703284925	1.8944112028716784	2.7549843078905534	target	1	0	stabilized	1.0134117467231585	1.8944112028716784	1.6662019750644164	1596	0	1092	1	ACTH
ARI1_HUMAN	57	1.854405041085557	3.750871582778363e-4	-0.9148138681225986	1.9157119068321382	1.6304940321423225	2.75468337119793	target	2	0	stabilized	1.0133025072152786	1.6304940321423225	4.168626062968605	1597	0	1092	1	ACTH
SYHM_HUMAN	47	3.9767831802951696	6.061556139596296	0.6832515729760168	0.5411172535921297	1.511255263597292	2.742214856060917	target	1	0	stabilized	1.0087659354959113	1.511255263597292	3.9767831802951696	1605	0	1099	1	ACTH
CTR9_HUMAN	57	3.357057179650217	-6.817107150386682e-4	-0.5275681444675213	0.9527940300089576	0.5799004338853769	2.730495204341646	target	0	1	destabilized	1.0044829862787894	0.5799004338853769	3.357057179650217	1615	0	1108	1	ACTH
AS3MT_HUMAN	37	3.397787579034725	7.950670104700261	0.8299334465532912	0.3870938936397782	1.6421587869326322	1.6608539608922115	target	4	0	stabilized	1.0006556660981327	3.148018318499118	3.397787579034725	1626	0	1118	1	ACTH
UBQL2_HUMAN	37	-0.4577243665513481	1.0428893962579021e-4	-0.800679191504934	1.802280415530041	1.6703879792596528	2.7182852201905807	target	6	0	stabilized	1.0000012477475235	2.2833330201494055	3.612108622306194	1631	0	1122	1	ACTH
PABP4_HUMAN	42	2.228497876103801	1.4145888616355412e-4	-0.6698025165248642	1.672513110752995	1.5582740387507252	1.6705473679936886	target	3	0	stabilized	0.9981209766847148	2.547800903918531	2.228497876103801	1635	0	1125	1	ACTH
CDC37_HUMAN	37	0.04643281460660005	2.9635740763436797e-5	-1.4731515299285474	2.4671824875645214	2.183311195761935	2.709169911783876	target	3	0	stabilized	0.9966422823556571	2.183311195761935	0.04643281460660005	1644	0	1133	1	ACTH
BZW2_HUMAN	42	3.8276034769898613	5.036518862413987	0.7496993365408214	0.5069237957938909	1.6295610208735134	2.159200264763937	target	2	0	stabilized	0.9922683938321636	2.410679878362894	3.8276034769898613	1660	0	1148	1	ACTH
ACTBM_HUMAN	37	3.258622230524039	6.820740244856764e-4	-0.9615348819442737	2.0220801957910397	1.8389568948075727	2.693705653553771	target	5	0	stabilized	0.9909178120165513	3.8695815568616414	3.258622230524039	1664	0	1151	1	ACTH
RAC1_HUMAN	52	2.9102685416395264	1.44245701537991e-4	-2.7942495755489505	3.802061413817476	3.142453014419176	2.692890115715343	target	2	0	stabilized	0.9906150093264692	3.2102059693949374	3.0773610498368016	1665	0	1151	1	ACTH
CHTOP_HUMAN	52	2.8275094154547475	7.176842459616492e-4	-2.021824379174955	3.040892580954224	2.456409409404791	2.6875515408564152	target	1	0	stabilized	0.9886305712629706	2.456409409404791	2.8275094154547475	1672	0	1157	1	ACTH
CCAR2_HUMAN	37	1.9346283457840188	3.110552065104071e-4	-7.03651913859174	8.038035120986857	5.596784163994865	2.6798273624416065	target	1	0	stabilized	0.9857523754485007	5.596784163994865	1.9346283457840188	1685	0	1169	1	ACTH
RL18A_HUMAN	42	-9.8370599614059	2.4560509758704773e-5	-1.0519538819089413	2.0577757940206953	1.802118379167864	2.660296981729383	target	3	0	stabilized	0.9784377638282008	2.402860665081231	3.1386175368562443	1707	0	1190	1	ACTH
JUPI1_HUMAN	37	1.3797708908118553	1.2500056402980274e-4	-2.592379908028313	3.5900855962694576	2.78813970040426	2.6569865203799963	target	2	0	stabilized	0.977192593516782	4.775250096800625	1.3797708908118553	1713	0	1195	1	ACTH
SLK_HUMAN	52	1.8331381767623813	2.725701985161899e-4	-1.9402582508528976	2.936075437607723	2.4688372696277954	2.5682829698644767	target	3	0	stabilized	0.9757869115422985	2.981152723017714	2.5069270328862032	1716	0	1197	1	ACTH
MCES_HUMAN	47	-6.563040002896193	-6.160993071362295e-5	-1.0530571921630592	1.0350504234302	0.4454124462077139	2.6500879947286795	target	0	3	destabilized	0.9745928450048308	0.2902027915123731	1.7407272890498335	1718	0	1198	1	ACTH
UBAP2_HUMAN	52	2.727947397839385	6.536262052273368e-4	-2.7299637574474858	3.7730447078995306	2.9834291101548476	2.6395771758522533	target	2	0	stabilized	0.970618743669111	2.9834291101548476	2.727947397839385	1730	0	1209	1	ACTH
K2C1_HUMAN	67	1.302663203692902	0.017015776777776333	-0.8858743606574042	1.8863609269653392	1.5725463991610984	2.6365755652023	target	3	0	stabilized	0.9694809407581302	2.040978921693214	4.291999362026941	1733	0	1211	1	ACTH
RPGF1_HUMAN	47	4.030826257524954	6.956960693276567	0.8942884658271161	0.31435817288634593	1.8040484687095741	2.6350161416339173	target	1	0	stabilized	0.9688893078318368	1.8040484687095741	4.030826257524954	1739	0	1216	1	ACTH
ADRO_HUMAN	42	-10.929905278020158	-3.515638077410591e-5	-0.5981964629622039	1.005960137057517	0.5797782278947007	2.6280380818574955	target	0	1	destabilized	0.9662375913307277	0.5797782278947007	-10.929905278020158	1752	0	1228	1	ACTH
RAB2A_HUMAN	37	3.308190399965997	-7.60814047579713	1.1585918380638303	0.6841451875599684	0.45044551828493307	1.675407132875586	target	1	2	destabilized	0.9648750107635895	0.45044551828493307	3.308190399965997	1757	0	1232	1	ACTH
DNPH1_HUMAN	62	-7.18693240574504	-5.376434379391171e-5	-0.7308508817180335	1.0063389078936398	0.4539170191267895	2.170415398261104	target	0	2	destabilized	0.9646040438422756	0.4539170191267895	1.4357896562061339	1758	0	1232	1	ACTH
CDV3_HUMAN	47	2.737900229373728	4.1404310038803144e-4	-1.7867332177450213	3.0588546545047888	2.8683236921855504	1.6280281868386952	target	4	0	stabilized	0.957536846347349	3.418775530615025	1.2415794502820097	1784	0	1257	1	ACTH
RPAB3_HUMAN	37	2.9452135633238785	0.001444354186868213	-3.1560085238114164	4.181891077755325	3.205453031439737	2.6024977764202393	target	4	0	stabilized	0.9564716671051768	3.205453031439737	2.9452135633238785	1786	0	1258	1	ACTH
MPP7_HUMAN	42	3.4483859108124504	7.700277279546878e-4	-4.029132831718389	5.002642761863758	4.686966774385848	2.600228053286107	target	1	0	stabilized	0.9555991539832424	4.686966774385848	3.4483859108124504	1790	0	1261	1	ACTH
MCMBP_HUMAN	42	1.3485153400566323	3.413182902353673e-4	-1.3745922091749843	2.378671347342607	1.8878365537679875	2.573813102790517	target	3	0	stabilized	0.9542272040283006	3.532784273515559	1.3485153400566323	1796	0	1266	1	ACTH
RANDOM18681	42	2.6762037227757496	2.8472133008642346e-4	-1.2761122302619758	2.2665765463037753	1.9107631421380815	2.5957042501222984	target	1	0	stabilized	0.9538578671293372	1.9107631421380815	2.6762037227757496	1799	0	1268	1	ACTH
UN45A_HUMAN	42	1.3989575132480485	0.05592949529830117	-0.9521907164412111	1.9617970515835257	1.5692333177897133	2.5820502764417834	target	2	1	stabilized	0.9485837641333202	1.6408523205536687	1.3989575132480485	1815	0	1283	1	ACTH
TF2AY_HUMAN	57	3.0432178832925993	9.99528353443195e-4	-1.4285680647027093	2.393991697617402	1.9394647577433315	2.575199113400275	target	2	0	stabilized	0.9459268567185698	1.9394647577433315	3.427297851790037	1820	0	1287	1	ACTH
TWF1_HUMAN	42	-1.4880855760017941	9.168171814962444e-5	-0.7327745636084857	1.7377991296747444	1.5345419119796342	1.7986527905617582	target	2	0	stabilized	0.9451179607146605	1.5345419119796342	2.484173832756959	1822	0	1288	1	ACTH
MPPB_HUMAN	52	3.238930975539105	0.0010728481493098494	-1.3550013546261117	2.4150896056072995	2.100507182222218	2.572628833198582	target	2	0	stabilized	0.944928268404453	2.100507182222218	3.090144786716723	1823	0	1288	1	ACTH
ACTN4_HUMAN	37	-5.969193046349888	-7.51659413497132e-5	-0.5011513165626001	1.0014383594857212	0.6424378755185144	2.5693356257731463	target	1	2	destabilized	0.9436473541149873	0.30217834157805507	3.2800753690801057	1825	0	1289	1	ACTH
MED24_HUMAN	47	3.4346804822626402	-8.67624543236855	0.8644380300761195	0.6632091214432662	0.3387110489730402	2.560752490705156	target	0	1	destabilized	0.9403011569807803	0.3387110489730402	3.4346804822626402	1838	0	1301	1	ACTH
RBBP5_HUMAN	47	2.8213845928242987	-3.5693216262005974e-4	-0.7523354548820623	1.000783098896149	0.3307159361134976	1.6209555620802591	target	0	5	destabilized	0.9379271973699868	0.3234387732196129	3.13984281013528	1846	0	1308	1	ACTH
UBP1_HUMAN	67	3.581188848182753	3.512177278455063	1.3902666436452134	0.06408360222577465	2.0711565761143347	2.5515761161978214	target	1	0	stabilized	0.9367112530180667	2.0711565761143347	3.581188848182753	1853	0	1314	1	ACTH
RISC_HUMAN	52	1.5862125690972844	-2.779207226541991e-4	-0.5819257621618216	1.000511204809754	0.5771681294830283	2.544061327802971	target	0	3	destabilized	0.9337617520281011	0.552830657075102	3.104264759622434	1869	0	1329	1	ACTH
TBCD_HUMAN	67	-0.8049829260934007	-9.019743689365253e-5	-0.8975870885754177	1.006408486395148	0.3143370977841278	2.530303465585821	target	1	3	destabilized	0.9283392424182441	0.3143370977841278	4.327259302129028	1896	0	1355	1	ACTH
PITH1_HUMAN	37	2.311194094230811	-4.171893786896363e-4	-0.6484717151735893	1.0636621635554824	0.6613764355820682	2.521189889174908	target	0	1	destabilized	0.9247309683262747	0.6613764355820682	2.311194094230811	1910	0	1368	1	ACTH
FUS_HUMAN	47	2.0142325902649554	-1.1932166648543683e-4	-0.6760722594529888	0.9986466389200767	0.48704720941430857	2.4945613891258756	target	0	6	destabilized	0.9141129178080314	0.4008738059895664	3.435048097553059	1945	0	1402	1	ACTH
SEPT6_HUMAN	42	3.326404114478106	6.59131070973072	0.9465333032133283	0.2808415398462582	1.5362782962819252	1.7744465595529317	target	3	0	stabilized	0.9130438551586855	4.974120253336629	3.326404114478106	1947	0	1403	1	ACTH
ZMYM2_HUMAN	47	-10.501980739134998	-9.293505573126877e-6	-0.9046886832230849	1.0063608465146678	0.3277104508934001	2.4845653733108994	target	0	1	destabilized	0.9100977441756933	0.3277104508934001	-10.501980739134998	1958	0	1413	1	ACTH
M3K6_HUMAN	57	3.3576540972763067	7.337341136908502	0.8350975528208685	0.3179202188683322	1.5128694105211347	2.480503027082198	target	1	0	stabilized	0.9084613731098438	1.5128694105211347	3.3576540972763067	1964	0	1418	1	ACTH
SERA_HUMAN	62	3.4477877571319633	0.0010048951288107162	-6.677595372206403	7.3503551368617845	4.44262535810883	2.4736732346902803	target	1	0	stabilized	0.905704185493675	4.44262535810883	3.4477877571319633	1975	0	1428	1	ACTH
GLTL5_HUMAN	37	1.986412032324627	-5.693926277229183e-4	-0.9604797065556425	1.0256273978704895	0.44002615437293596	2.47366168239596	target	0	2	destabilized	0.9056995153856213	0.422927774160147	1.986412032324627	1976	0	1428	1	ACTH
SYIM_HUMAN	57	-0.5204080964420775	-1.8866610467427824e-4	-0.7764259747491081	1.0064133224441552	0.4511251172586716	2.4718603188493824	target	0	1	destabilized	0.9049710326791295	0.4511251172586716	-0.5204080964420775	1978	0	1429	1	ACTH
ERF3B_HUMAN	37	-1.5418114138157797	-0.0066886987324091245	-1.3573573779942274	1.057362006822094	0.31037041993652575	2.4717972482444663	target	0	1	destabilized	0.9049455169130945	0.31037041993652575	-1.5418114138157797	1980	0	1430	1	ACTH
KT222_HUMAN	67	3.306154772161206	4.5440374786406216e-4	-0.8306017684590596	1.832253106531718	1.6228848327534535	2.465332422929153	target	1	0	stabilized	0.9023266555743127	1.6228848327534535	3.306154772161206	1990	0	1439	1	ACTH
PROF1_HUMAN	37	2.5473314575220067	3.581400408292953e-4	-0.9549655388438845	1.940836841467338	1.6599761622485398	2.4609328741818297	target	2	1	stabilized	0.9005404952067071	1.9755354770232123	2.5473314575220067	1995	0	1443	1	ACTH
YKT6_HUMAN	52	3.4493818493989683	6.990865562230014	0.5832232268235024	0.6590472935379769	1.544083969643516	1.5791555279932867	target	5	0	stabilized	0.8930920431456646	1.8697456022272902	3.2473997576324214	2014	0	1461	1	ACTH
PPIF_HUMAN	57	2.971697726733306	3.2701424084503926e-4	-2.7497323227769837	3.8753026027266193	3.4077377852703394	2.434487647259071	target	1	0	stabilized	0.8897363225916277	3.4077377852703394	2.971697726733306	2035	0	1481	1	ACTH
PFD5_HUMAN	57	3.5042459646715436	3.7767255704359377e-4	-1.9984550330052544	3.0057465702679487	2.6241212350635537	2.4283117783368495	target	4	0	stabilized	0.8871962744826342	2.95436499995271	3.4708325891382787	2045	0	1490	1	ACTH
HNRL2_HUMAN	42	3.1038039185530706	5.559500449140693e-4	-1.185571963926707	2.2078212502174877	1.8729720527140061	2.426939424630989	target	2	0	stabilized	0.8866309674840719	2.311130692225518	3.1038039185530706	2046	0	1490	1	ACTH
RAB1B_HUMAN	57	0.2979804551228641	1.0632060661335955e-4	-4.828863968197433	6.170733452256794	5.3080855874875965	2.42669254966284	target	3	0	stabilized	0.8865292395534545	5.3080855874875965	4.030276320425445	2047	0	1490	1	ACTH
ANM5_HUMAN	42	3.440509232382355	7.218157545971835	0.5613645239790088	0.714117688884262	1.5283584647090702	1.5886685466892871	target	4	0	stabilized	0.8838821850647007	3.0246168702898046	3.1449393871574824	2057	0	1499	1	ACTH
ICLN_HUMAN	57	3.4041817529748397	-7.43538408342295	0.5732874763305669	0.8335629019077846	0.5538829006829522	1.8712691689430763	target	1	2	destabilized	0.88087036890802906	0.2802888958326457	3.4041817529748397	2069	0	1510	1	ACTH
CALR_HUMAN	47	-2.2952477119512573	-0.13265748482565617	-2.0868747058868093	1.0038161734317288	0.6209939544550742	2.4122089498265717	target	0	1	destabilized	0.880542904394171	0.6209939544550742	-2.2952477119512573	2070	0	1510	1	ACTH
IF4G3_HUMAN	42	2.6394396499166874	5.329203856102309e-4	-1.651650384580091	2.6293560860972454	2.1017914503926303	2.403972927901373	target	3	0	stabilized	0.8771227553372452	2.494367327821693	2.6394396499166874	2079	0	1518	1	ACTH
ACADV_HUMAN	52	3.8468336318249725	5.218211949232868	0.7195618999646427	0.5424365654708581	1.6249101388224754	2.391994716188754	target	2	0	stabilized	0.8721276271347558	4.0727794199556016	3.308093658362087	2099	0	1537	1	ACTH
SYWC_HUMAN	47	-9.288671129061838	3.4084947034845176e-4	-0.8603738807482788	1.8611993136239025	1.5619445553144278	2.3799776611649355	target	3	0	stabilized	0.8670911015741808	1.7729144052040664	3.080487199115552	2125	0	1562	1	ACTH
PSD10_HUMAN	37	0.5650649804066783	2.604643838133762e-5	-3.3158828589062646	4.317180073347156	3.5076383874126957	2.3770643297693397	target	4	0	stabilized	0.8658662514402627	4.1447842488820825	0.5650649804066783	2130	0	1566	1	ACTH
YBOX1_HUMAN	57	-10.596710044158893	5.360120217858384e-5	-1.8129036510444385	2.8555537834479114	2.308320800411866	2.3693677238320427	target	7	0	stabilized	0.8626231363608423	3.7784487898192127	2.046151485189235	2143	0	1578	1	ACTH
NUDC_HUMAN	67	3.265683476666784	-7.981244385493394	1.316428054344331	0.8501707423703393	0.6275167484846926	2.364173626750701	target	0	1	destabilized	0.8604285430188532	0.6275167484846926	3.265683476666784	2151	0	1585	1	ACTH
RBGPR_HUMAN	37	-1.1209464592495593	-2.1686740767730143e-4	-1.0821743214576725	1.0354303049954854	0.3912733600786492	2.362221445152459	target	1	2	destabilized	0.8596024666204319	0.2681070328680355	3.326604420589325	2156	0	1589	1	ACTH
GRDN_HUMAN	42	3.93044036668706	-5.969737826594675	0.6298986201493054	0.8635987757769664	0.35615449090021567	2.3621850057543465	target	0	1	destabilized	0.8595870405987753	0.35615449090021567	3.93044036668706	2157	0	1589	1	ACTH
MAK_HUMAN	47	1.4039383946682027	-0.02751773698633037	-1.2425657581319276	1.0202108130489906	0.2640941571746836	2.3610110636839954	target	0	2	destabilized	0.8590899441084895	0.2640941571746836	3.0095291163548556	2159	0	1590	1	ACTH
SSRP1_HUMAN	52	4.294243686951602	10.41336835302501	0.49997918488148463	0.5477462932434821	1.5774620010228622	1.8193435771482998	target	3	1	stabilized	0.8585869495183227	1.6753065747355984	3.4372949086194917	2161	0	1591	1	ACTH
RS23_HUMAN	37	3.257479930958016	4.029012324181732e-4	-6.514617566317375	7.515821915404843	5.792196392523826	2.3529723332060053	target	3	0	stabilized	0.8556793515826031	5.792196392523826	3.257479930958016	2173	0	1602	1	ACTH
ADT3_HUMAN	67	4.023055562672646	7.039922720583105	0.9603248323954598	0.40208901872659486	1.8666827040395648	2.3523699578242137	target	1	0	stabilized	0.8554233126601083	1.8666827040395648	4.023055562672646	2175	0	1603	1	ACTH
PCBP3_HUMAN	37	3.3970009183185756	7.554022375546683	1.3842957428059275	0.03607973417780125	2.080863664154755	2.3402831671623314	target	1	0	stabilized	0.8502719336561301	2.080863664154755	3.3970009183185756	2187	0	1614	1	ACTH
MESH1_HUMAN	57	2.7865755806557346	2.8528619826924796e-4	-1.1650850962422203	2.182505077201918	1.8425739492107447	2.3396562885277494	target	2	0	stabilized	0.8500040333363645	1.8425739492107447	3.840350441868613	2189	0	1615	1	ACTH
GMDS_HUMAN	57	-12.577578119102078	1.8148893075425573e-6	-0.8863755849954715	1.8950177983967764	1.6603821071858291	2.056639253913466	target	2	0	stabilized	0.8491295575652082	3.3912949295565045	3.033319368738093	2194	0	1619	1	ACTH
LYPL1_HUMAN	52	0.08331792735741743	-6.373180535287169e-5	-0.675878620637244	1.0011951461988877	0.5364636319158903	2.2788687707192885	target	0	3	destabilized	0.847494889461045	0.49878270065025326	3.0622415060267834	2206	0	1630	1	ACTH
TIM9_HUMAN	57	0.0847753635743915	-1.9244653956198863e-4	-0.5753201128131942	1.007132490827923	0.584841865220522	2.333083046775345	target	0	3	destabilized	0.8471905889661212	0.44486734397922406	3.305063522078932	2207	0	1630	1	ACTH
MK06_HUMAN	37	4.000065023488561	-3.8820545738559774e-4	-0.8916765201123423	0.9714831810356253	0.36459768799277104	2.3313446153050723	target	0	1	destabilized	0.8464451892400636	0.36459768799277104	4.000065023488561	2209	0	1631	1	ACTH
NPM3_HUMAN	52	3.0069384267664963	3.7503254979025377e-4	-0.8259638031468548	1.8265181283753367	1.6560569708086033	2.3291530370478783	target	1	0	stabilized	0.845504698081301	1.6560569708086033	3.0069384267664963	2218	0	1639	1	ACTH
TBA1B_HUMAN	67	-10.926092810877606	-4.4216762528857614e-5	-0.9529096961354638	0.9954729981153287	0.2955409976545616	2.325410803984475	target	1	2	destabilized	0.843896713317296	0.2955409976545616	3.1969366118399707	2229	0	1649	1	ACTH
SAFB1_HUMAN	37	2.8262687903505492	4.227552880556981e-5	-0.6965853994510591	1.7003283896884904	1.5603788054379593	2.314328387992079	target	1	0	stabilized	0.8391195322688607	1.5603788054379593	2.8262687903505492	2250	0	1669	1	ACTH
41_HUMAN	57	4.020869667672062	8.849312433466148	1.1286434933532368	0.2492117752911936	2.018857410964094	2.3031624143495866	target	2	0	stabilized	0.8342831413000708	2.018857410964094	3.9682205114042604	2272	0	1690	1	ACTH
MERB1_HUMAN	47	3.5221306361240403	5.871463310040683	0.8227247368192521	0.44159246402645347	1.6574322741995429	2.2951523457319785	target	4	0	stabilized	0.8307992228919101	3.4199836569932827	3.4120107602226546	2286	0	1703	1	ACTH
LSM1_HUMAN	57	1.0284651241570448	-5.747852896386277e-4	-1.1049761247913532	1.041040617506118	0.4312184129605387	2.293016955216356	target	1	2	destabilized	0.8298683981861337	0.4312184129605387	3.0052616343150067	2288	0	1704	1	ACTH
TRPC4_HUMAN	62	2.82673526921672	2.018367889324417e-4	-2.6229937342768794	3.630732977748421	2.790870126208375	2.2877957649970697	target	3	0	stabilized	0.8275888059830919	3.587845073428727	2.1267034613886304	2299	0	1714	1	ACTH
TULP1_HUMAN	52	-0.7361432655520964	-0.03411991593165055	-0.9646485607598304	1.009963969572051	0.506594987255739	2.2779330075331705	target	0	3	destabilized	0.8232684561347703	0.4414840359670707	3.369675973618618	2319	0	1733	1	ACTH
AL1A3_HUMAN	42	0.351640253613511	0.04181777925552988	-2.6209924007499037	3.6347762610978394	2.5163403917653175	2.275493006037841	target	1	0	stabilized	0.8221967348762702	2.5163403917653175	0.351640253613511	2326	0	1739	1	ACTH
NUCL_HUMAN	67	2.535657351319405	-4.192866263799917e-4	-0.999316983917516	0.9981151441157503	0.3360165689640417	2.2748397986266844	target	0	1	destabilized	0.8219096317373641	0.3360165689640417	2.535657351319405	2329	0	1741	1	ACTH
NEMO_HUMAN	67	2.2483023353749285	1.2650833165204966e-4	-2.14422589700543	3.0962125798925353	2.470093162115821	2.2619818325488996	target	3	0	stabilized	0.8162413460740978	2.7287065084430857	3.226549205694096	2357	0	1768	1	ACTH
HIRA_HUMAN	57	0.8096813179406617	-1.8637210144559227e-4	-1.0081513456277476	1.01236329669935	0.35669980293441955	2.2475464905713705	target	0	1	destabilized	0.8098391726097062	0.35669980293441955	0.8096813179406617	2386	0	1796	1	ACTH
BLMH_HUMAN	67	0.054035062098453754	-1.7174256490067657e-4	-0.9374723432365638	1.0007360200103543	0.3338178261600006	2.2473528715409503	target	0	1	destabilized	0.8097530220577397	0.3338178261600006	0.054035062098453754	2388	0	1797	1	ACTH
PPAC_HUMAN	37	2.2645512281705074	2.7124622348673053e-4	-2.0467251121953183	3.0446192752049095	2.437118578179422	2.2452618024667506	target	1	0	stabilized	0.8088221301932311	2.437118578179422	2.2645512281705074	2390	0	1798	1	ACTH
TBB5_HUMAN	67	-1.7476725429858844	-8.660978038582376e-5	-1.027368461036075	1.001058606398489	0.2119146390850272	2.2392354433552564	target	1	2	destabilized	0.8061344876733539	0.2119146390850272	3.4206346844856266	2398	0	1805	1	ACTH
ACL6A_HUMAN	47	2.6651193304533924	3.427094810779872e-4	-0.8309384720824864	1.8309738074882604	1.5539638387095276	2.2100829514232325	target	2	0	stabilized	0.7930300494059049	3.50581041152461	2.0267461015244095	2455	0	1861	1	ACTH
UB2E2_HUMAN	42	1.96896993846368	1.0593505750653723e-4	-1.7449921689243764	2.74775440278304	2.3836528914547652	2.1788958279032347	target	3	0	stabilized	0.7788182475242369	2.3836528914547652	1.96896993846368	2524	0	1929	1	ACTH
TXND5_HUMAN	42	2.9054564774685665	-4.933951341556727e-4	-0.4383460287434644	0.9804459620624391	0.6245837184106499	2.172571298021121	target	0	2	destabilized	0.7759113960405872	0.6245837184106499	2.9054564774685665	2529	0	1933	1	ACTH
GIMA4_HUMAN	42	3.548901447072984	8.938081475382088	1.3898757899416152	0.21668497279867852	2.422323355367478	2.138255069339515	target	1	0	stabilized	0.7599901082649136	2.422323355367478	3.548901447072984	2608	0	2011	1	ACTH
DUOX2_HUMAN	57	3.0161581184343937	6.436715579903222e-4	-1.6432829382533476	2.6928473177169123	2.3297553310633448	2.1372246947847655	target	2	1	stabilized	0.7595081157721211	2.4966999737528788	3.0161581184343937	2611	0	2013	1	ACTH
NP1L4_HUMAN	37	2.6625930039885692	1.3873648922905728e-4	-1.2758262351977352	2.278453533943964	1.9160326630835267	2.1309760608092003	target	2	1	stabilized	0.7565801192707435	1.9160326630835267	2.6625930039885692	2619	0	2020	1	ACTH
RL23_HUMAN	52	-84.41045407040275	0.002401410718136941	-1.808430542100148	2.813593184101568	2.1256835161976575	2.1255374981978004	target	1	0	stabilized	0.7540247107207452	2.1256835161976575	-84.41045407040275	2634	0	2034	1	ACTH
AP1B1_HUMAN	37	2.197872865712536	2.5385405278624643e-4	-1.0094887525779683	2.012206056945795	1.8429849445896103	2.1222597647675236	target	1	0	stabilized	0.7524814477644873	1.8429849445896103	2.197872865712536	2638	0	2037	1	ACTH
PP1G_HUMAN	37	2.2355316931852887	3.4150972365770184e-4	-1.6502987238628761	2.6487042459707077	2.252831102621994	2.1163168291791505	target	5	0	stabilized	0.7496772330234934	2.252831102621994	2.2355316931852887	2656	0	2054	1	ACTH
PAPOB_HUMAN	37	3.3662834442742535	7.628820198319534	1.2389867655121165	0.12720755035937292	1.911383432714172	2.1140832142230304	target	1	0	stabilized	0.7486212500711661	1.911383432714172	3.3662834442742535	2667	0	2064	1	ACTH
ZN516_HUMAN	42	1.9303123649389524	1.2339322689260582e-4	-1.8538949616301281	2.751304187004018	2.2914144635251725	2.1063266463811634	target	2	0	stabilized	0.7449455044296884	4.943048552272926	1.9303123649389524	2678	0	2074	1	ACTH
PSMG3_HUMAN	47	-4.890263787368851	2.7170840509211756e-5	-1.7522532481625746	2.7550675868563133	2.4694952740328366	2.082273072092625	target	1	0	stabilized	0.7334601201381765	2.4694952740328366	-4.890263787368851	2728	0	2123	1	ACTH
CTBP2_HUMAN	57	3.45560556685936	6.811451213655772e-4	-0.7412759198297707	1.7663214259938078	1.6219428168871592	1.5503415820728912	target	2	0	stabilized	0.7325902831469957	1.8203211791284437	3.45560556685936	2731	0	2125	1	ACTH
SYQ_HUMAN	52	0.16880504382180894	0.00013792541800443551	-0.9431919241670129	1.9382798165370019	1.7668725949006623	2.0765375908946018	target	1	0	stabilized	0.7307018869320864	1.7668725949006623	0.16880504382180894	2740	0	2133	1	ACTH
MYH13_HUMAN	42	2.1724804323391966	-5.151877364893233e-4	-0.5938163080394776	0.995902064881999	0.5759750295115743	2.0753668182897407	target	0	2	destabilized	0.7301379179576069	0.30852807024003454	2.1724804323391966	2745	0	2137	1	ACTH
MTDC_HUMAN	37	3.0145273503012264	5.855573580002216e-4	-1.049978647785159	2.0510804203629553	1.7223598270455567	2.0699137077604393	target	1	0	stabilized	0.727506919336096	1.7223598270455567	3.0145273503012264	2757	0	2148	1	ACTH
ILF2_HUMAN	57	3.4232767433367863	-8.763847234863524	0.48647135171233225	0.7884348450702008	0.6485416894841036	2.0644927927465937	target	0	1	destabilized	0.7248845752972718	0.6485416894841036	3.4232767433367863	2769	0	2159	1	ACTH
API5_HUMAN	37	3.4302936159170523	5.284634843602304e-4	-0.8238821812783205	1.7969172819332753	1.6774676948066647	2.059443099081605	target	2	0	stabilized	0.7224356060013287	4.898071813789992	3.4302936159170523	2780	0	2169	1	ACTH
PFKAL_HUMAN	37	3.7492937099015675	0.0011087441987526975	-0.8764868994279877	1.878518152406085	1.6369385367155478	2.0592987756435877	target	4	1	stabilized	0.7223655246791841	1.8433847020478336	3.7492937099015675	2781	0	2169	1	ACTH
G3P_HUMAN	67	3.4532936909875622	-9.295165630406778	0.71451636576809	0.7050987852819564	0.37761712562778815	2.0559461125303216	target	0	1	destabilized	0.7207361373906414	0.37761712562778815	3.4532936909875622	2793	0	2180	1	ACTH
TADBP_HUMAN	47	3.397090639814887	-8.165001246985856	0.6528565411451266	0.749682171926815	0.4980068996338122	2.0539933780992468	target	0	2	destabilized	0.7197858875962265	0.4980068996338122	3.397090639814887	2799	0	2185	1	ACTH
DNMT1_HUMAN	42	3.418956177243699	7.607350501507297	0.6971789377226085	0.643777890928058	1.5751299799944543	1.4512982156256906	target	6	0	stabilized	0.7174518452538394	3.9408331908874916	3.1576267125703446	2810	0	2195	1	ACTH
MSH2_HUMAN	57	3.3825423960923926	6.972869455651485	0.7552086330303128	0.4922962869329627	1.5797692250741249	2.048535534515768	target	2	0	stabilized	0.717125164457105	1.872645267872301	3.1878774192443395	2812	0	2196	1	ACTH
CCD43_HUMAN	67	3.1994696091484576	8.368298368986678e-4	-1.3198609628702611	2.2958674784608433	2.0899960881607282	2.0478618880215484	target	1	0	stabilized	0.7167962674137733	2.0899960881607282	3.1994696091484576	2815	0	2198	1	ACTH
PSMG1_HUMAN	57	-1.1300712872277172	1.2592039102422771e-4	-3.5553138448413413	4.6200793886224085	3.8033825193577724	1.907249638553306	target	5	1	stabilized	0.7059945746711933	3.8033825193577724	2.8676835662677944	2867	0	2249	1	ACTH
ZCCHV_HUMAN	42	1.447793108342495	2.083622378223282e-4	-0.6542108974256595	1.660622413617713	1.521062781956126	2.0189567063489724	target	1	0	stabilized	0.7025808959848809	1.521062781956126	1.447793108342495	2881	0	2262	1	ACTH
DDX50_HUMAN	57	2.5936055910662765	-2.4670106478704866e-4	-1.0985214804212269	1.071101186218093	0.4020511448824465	1.7163004868400153	target	0	4	destabilized	0.7018538758956043	0.4020511448824465	3.430689516248848	2884	0	2264	1	ACTH
EIF2A_HUMAN	57	2.4823021242635406	-5.562766492597679e-4	-1.4494646343454949	1.0767305562406624	0.12569026625351765	1.5945734623070653	target	0	2	destabilized	0.699859399189357	0.12569026625351765	2.4823021242635406	2897	0	2276	1	ACTH
KLC1_HUMAN	42	3.2678631005827308	8.258980217942713e-4	-0.6154935023601205	1.6723335870972715	1.5430058779836286	2.001387193896417	target	3	0	stabilized	0.6938405370809572	2.943948176453153	1.5676678068487715	2933	0	2311	1	ACTH
GEPH_HUMAN	67	1.4287965010924355	-2.2127024169218366e-4	-0.9047435452719641	0.9945779158779893	0.28756399001877614	1.994044089789721	target	0	1	destabilized	0.690164782523743	0.28756399001877614	1.4287965010924355	2949	0	2326	1	ACTH
ASNA_HUMAN	47	3.1670751491356985	-5.906969876177787	3.3843468276667954	0.8615441043494176	0.5333969208536207	1.9908265545279888	target	0	2	destabilized	0.6885499065349575	0.5333969208536207	3.264248925896181	2955	0	2331	1	ACTH
SRC8_HUMAN	67	2.7273565056993574	6.147323925859674e-5	-1.2285393367858908	2.2297035436962167	2.0746184046197786	1.975460267206402	target	5	0	stabilized	0.6808014178887102	2.5437868179134475	3.405130044413286	3000	0	2375	1	ACTH
PYR1_HUMAN	42	2.1070379591752886	2.5506033792320064e-4	-0.6667993305381613	1.6651940286735112	1.5271212019994733	1.973324753498958	target	1	0	stabilized	0.679719812329311	1.5271212019994733	2.1070379591752886	3005	0	2379	1	ACTH
ACTY_HUMAN	52	3.42974056821381	7.316000788924575	1.0364089586845082	0.3942254646510533	1.8873301826107218	1.5700783120088793	target	6	0	stabilized	0.6741763515565198	3.2931800290621043	3.2396206755924752	3046	0	2419	1	ACTH
ZFYV9_HUMAN	52	3.6049409760852393	3.575433806567425e-4	-2.152231362230071	3.1579031940244535	2.778887651220583	1.9624125836033854	target	3	0	stabilized	0.6741746262955304	3.927963606730099	3.307407760096843	3047	0	2419	1	ACTH
NOP58_HUMAN	47	-115.07047690769383	-0.007250423877745442	-3.856881366518434	1.0331481539406606	0.39841732164785865	1.9621556387630565	target	0	1	destabilized	0.6740436845836592	0.39841732164785865	-115.07047690769383	3049	0	2420	1	ACTH
MYL6_HUMAN	67	1.4751326234023692	8.754455061874423e-5	-1.04522758473402	2.0464776670130567	1.7983478722853177	1.9541302405947292	target	2	0	stabilized	0.6699452047231692	1.7983478722853177	3.2015728472788827	3075	0	2445	1	ACTH
PP1R7_HUMAN	52	2.3214696823783214	3.956798892804763e-4	-1.390086676389998	2.3974088495653527	2.0496161793891012	1.5047965665137872	target	4	0	stabilized	0.6661455753381326	4.100862900431135	2.8712881282023983	3098	0	2467	1	ACTH
RL28_HUMAN	37	1.7572154949323922	2.4048264161791915e-4	-3.350382160994168	4.358801786312257	3.682756689774909	1.9314730401935183	target	4	0	stabilized	0.6582829450632952	3.682756689774909	1.7572154949323922	3146	0	2514	1	ACTH
AINX_HUMAN	67	3.4963640640803004	-10.670866016242462	0.8044140743910285	0.612411009637266	0.31023335598555646	1.9276979984995173	target	0	2	destabilized	0.6563265441366538	0.31023335598555646	3.406824138888968	3160	0	2527	1	ACTH
NEDD1_HUMAN	47	3.0396058572767624	5.703386742432021e-4	-1.2866130713292883	2.2799935985949817	2.025412639381126	1.9190608690637585	target	2	0	stabilized	0.6518359356802899	2.025412639381126	3.152028904049037	3179	0	2545	1	ACTH
SEPT2_HUMAN	67	3.463915544142365	-8.976780018432166	0.7576707113607543	0.6412796366525219	0.3430230055164593	1.918045375300886	target	0	1	destabilized	0.6513066337939674	0.3430230055164593	3.463915544142365	3184	0	2549	1	ACTH
FIP1_HUMAN	47	0.7568752731747347	0.039020034797767396	-13.14353625091499	14.1654841365798	9.912750702828925	1.913661525849849	target	1	0	stabilized	0.6490184361437324	9.912750702828925	0.7568752731747347	3197	0	2561	1	ACTH
HLAB_HUMAN	57	2.8030676478897028	5.661484956346884e-4	-1.9160929377200104	2.9792846737343397	2.4700998585894545	1.9041942585095557	target	1	0	stabilized	0.6440589576929493	2.4700998585894545	2.8030676478897028	3238	0	2601	1	ACTH
SPT6H_HUMAN	42	2.8302437646146488	2.025031325273497e-4	-0.7543716292275215	1.7698837085427168	1.5834759995510357	1.8998051849397681	target	1	0	stabilized	0.6417513466731727	1.5834759995510357	2.8302437646146488	3252	0	2614	1	ACTH
PSA1_HUMAN	47	-2.772052457435999	4.1919309669529626e-5	-0.6661991425965319	1.665268396319843	1.505172905905422	1.89662326307224	target	1	0	stabilized	0.6400750750635948	1.505172905905422	-2.772052457435999	3265	0	2626	1	ACTH
MIEN1_HUMAN	57	-88.32136215669483	0.008434539444563	-4.848732516459396	5.863973392004156	2.0882131963229775	1.8858568949120864	target	2	0	stabilized	0.6343823037672461	2.4572771879039865	3.313349346400724	3303	0	2663	1	ACTH
P4R3A_HUMAN	47	-65.87433148857004	0.004257550176598464	-5.456904143933135	6.457901633305484	3.973579217736982	1.881318444688936	target	2	0	stabilized	0.6319728314121223	3.973579217736982	-65.87433148857004	3318	0	2677	1	ACTH
RIR2_HUMAN	57	2.6790463351950957	2.9360041216471754e-4	-0.9658251836910098	1.9645250666358387	1.8510719073342996	1.8755489462345813	target	4	0	stabilized	0.628901387898323	2.0178896209759607	3.1175448832705444	3340	0	2698	1	ACTH
TPMT_HUMAN	37	3.350839532546783	-7.656035586319392	0.769376068372215	0.7551742485831748	0.5330448031647422	1.8676802069673315	target	0	2	destabilized	0.6246971297374093	0.5330448031647422	3.350839532546783	3377	0	2734	1	ACTH
NMT2_HUMAN	52	3.8276586229666067	5.326989286431991	0.9305831052557254	0.40500538419399446	1.8147583378791092	1.8658128715902609	target	2	0	stabilized	0.6236968142186772	5.188094049767906	3.8276586229666067	3384	0	2740	1	ACTH
HSP7C_HUMAN	67	3.403557150511553	-7.3814468866336505	0.5540607758554396	0.8316383003513451	0.5543423461015881	1.853497494875553	target	0	1	destabilized	0.6170743920434274	0.5543423461015881	3.403557150511553	3419	0	2774	1	ACTH
RAB1A_HUMAN	37	2.8009553793798627	4.0566972666290833e-4	-1.4690508135118578	2.4699191933814877	2.1109818964484623	1.849041137744509	target	1	0	stabilized	0.6146672008024385	2.1109818964484623	2.8009553793798627	3429	0	2783	1	ACTH
RAB35_HUMAN	57	-53.23840519159887	0.013531603309703662	-5.393697492721417	6.397569121226261	2.0860224180316	1.8424445911359006	target	1	0	stabilized	0.6110932719756494	2.0860224180316	-53.23840519159887	3447	0	2800	1	ACTH
NU214_HUMAN	42	2.866975256581691	9.736397575324598e-4	-2.030242624956454	3.093684350020348	2.3987593679323465	1.8306850739282288	target	2	0	stabilized	0.6046902541369343	2.5172892064311476	2.866975256581691	3497	0	2849	1	ACTH
H2B1C_HUMAN	67	4.638028804656401	-6.560274965151694	-0.4508184026676092	1.0014413513090081	0.2853599395961933	1.8285089527493752	target	0	1	destabilized	0.6035008548213858	0.2853599395961933	4.638028804656401	3505	0	2856	1	ACTH
COX5A_HUMAN	67	2.8437335401568307	-4.4495313622494245e-4	-0.6377879472356996	1.0169081562324536	0.529377120167093	1.8264604903343218	target	0	1	destabilized	0.6023799356665546	0.529377120167093	2.8437335401568307	3518	0	2868	1	ACTH
DEN2A_HUMAN	47	3.9742731749516462	6.379962418140842	0.7286959631223006	0.5035652348501133	1.6019408725338	1.8184092240235679	target	3	0	stabilized	0.5979620661475806	2.0414110555736062	4.5198568981739005	3536	0	2885	1	ACTH
SEPT8_HUMAN	67	3.418686189042594	-7.253106801462381	0.4933490552475869	0.8702483475196617	0.5668373607981139	1.8136086636718185	target	0	1	destabilized	0.5953185972574576	0.5668373607981139	3.418686189042594	3554	0	2902	1	ACTH
AFAD_HUMAN	42	1.6890063544417313	4.3405853749605984e-4	-1.6897044230716054	2.6975796826181955	2.1564237418863166	1.8076371700764227	target	1	0	stabilized	0.5920205615635402	2.1564237418863166	1.6890063544417313	3579	0	2926	1	ACTH
PDRG1_HUMAN	52	-46.159744338133976	0.004598296054205865	-1.9445856109666322	2.9519057535978344	2.1526897431923566	1.8050025961265759	target	2	0	stabilized	0.5905620300810819	2.1526897431923566	4.077179990792805	3588	0	2934	1	ACTH
AR6P4_HUMAN	67	3.3480080701402244	8.107592756918336e-5	-1.0241027026511285	2.0298028987961874	1.9504162538267753	1.7840537955004525	target	2	0	stabilized	0.5788881881316867	1.9504162538267753	0.30626686752742605	3661	0	3006	1	ACTH
LASP1_HUMAN	47	3.1264411320309926	2.3370777424833807e-4	-0.7618604951709849	1.7621958634557333	1.6564810101413245	1.4515767095096297	target	2	1	stabilized	0.5758333670475457	1.6564810101413245	3.1264411320309926	3683	0	3027	1	ACTH
DDX3X_HUMAN	57	3.3875467459604884	7.614428172633577	1.299892516918581	0.23134771829935874	2.016838336998275	1.7718151937032902	target	2	0	stabilized	0.5720045542515492	2.016838336998275	3.301107987230664	3703	0	3046	1	ACTH
MYL6B_HUMAN	67	3.5226877577546176	5.855872424955558	0.5304976881477865	0.6203690109019537	1.5646430445357866	1.7687699064247209	target	7	0	stabilized	0.5702843368618223	2.544651112081573	3.2563438317032913	3714	0	3056	1	ACTH
IDE_HUMAN	52	3.448153955885592	6.677865829009759	0.9001286089807627	0.35667503415472496	1.5994894317579536	1.7607007028677943	target	2	0	stabilized	0.5657118564481112	3.5483791789357926	3.1103384846105793	3757	0	3098	1	ACTH
ARHL2_HUMAN	52	3.386422532152003	6.694608122379802	0.7161695779905083	0.5428224920123513	1.531858095161486	1.758811734436612	target	4	1	stabilized	0.5646384301447744	1.9490310841135274	4.001390285163564	3765	0	3105	1	ACTH
DUS3_HUMAN	37	2.803881481813121	5.541244139617749e-4	-1.252814519786074	2.2241844062477534	1.81580876130832	1.7549843756859749	target	1	0	stabilized	0.5624599541351653	1.81580876130832	2.803881481813121	3776	0	3115	1	ACTH
RAB5A_HUMAN	42	0.9342755565644272	9.126519044995285e-5	-0.8062250202796515	1.818301975208741	1.522069773148649	1.7549480214486115	target	3	0	stabilized	0.5624392390710264	1.555770036867847	0.9342755565644272	3777	0	3115	1	ACTH
KS6A1_HUMAN	42	3.4043354142528446	6.977145739914003	0.6409154592938249	0.6433545738297077	1.5480510057747288	1.3750350346612092	target	5	0	stabilized	0.5558475869680697	4.255844866678113	3.2842111963208596	3830	0	3167	1	ACTH
SMRC1_HUMAN	42	2.3036866496985757	1.4086395623396375e-4	-0.9323104841600182	1.90672536710092	1.6336681181065325	1.736048322233961	target	1	0	stabilized	0.5516114512389877	1.6336681181065325	2.3036866496985757	3858	0	3194	1	ACTH
EZRI_HUMAN	67	1.8909582521744648	0.019610975314285274	-1.9453894006319277	2.9467822096305363	2.3330188132224756	1.7249544777835715	target	3	0	stabilized	0.5452006604444258	2.3330188132224756	3.215466157588128	3919	0	3254	1	ACTH
TTC38_HUMAN	47	-0.09877145356574378	1.1307550442165231e-4	-1.4757269026380075	2.4850346355964654	2.17836908318689	1.5799983527606425	target	2	0	stabilized	0.5446990636241156	2.17836908318689	3.216828062963783	3927	0	3261	1	ACTH
RL15_HUMAN	37	3.89829911453025	5.657277773700447	0.754476910075525	0.6105798362384193	1.788532408884348	1.312272581570778	target	3	0	stabilized	0.5428634199110527	3.015870183414741	3.89829911453025	3944	0	3277	1	ACTH
MTMR5_HUMAN	42	3.9204250804206633	-5.260261739957058	0.4412802961242528	0.889241898826123	0.6356688407951048	1.7198109483468633	target	0	3	destabilized	0.542214371032579	0.45503681547118185	3.107845247630491	3948	0	3280	1	ACTH
SSU72_HUMAN	47	3.332865729491041	-7.613811817652932	0.9192487515119049	0.7651355726550503	0.5714817165829781	1.6366842599559344	target	0	2	destabilized	0.5407046532087548	0.496165772382749	3.4084107868741715	3957	0	3288	1	ACTH
4EBP1_HUMAN	37	2.344470769584804	-5.552483338486762e-4	-1.1485090607930406	1.0530763870534285	0.3098930868496791	1.7168087707384718	target	0	1	destabilized	0.5404672016524913	0.3098930868496791	2.344470769584804	3960	0	3290	1	ACTH
PUR8_HUMAN	62	2.0456554593646175	2.651293904903788e-4	-1.5064873030947232	2.5018011750238034	2.139366793873732	1.7162371355098203	target	1	0	stabilized	0.54013418237483235	2.139366793873732	2.0456554593646175	3966	0	3295	1	ACTH
RL19_HUMAN	47	3.4412661271400684	7.141137387626019	0.49314882240829505	0.6817241664268369	1.535332301483155	1.7142987560335934	target	4	0	stabilized	0.5390041083900116	2.8532868910317686	3.237952786884973	3977	0	3305	1	ACTH
NIF3L_HUMAN	42	2.0800963691079994	3.66620960298392e-4	-0.8862922536741638	1.918070729308547	1.6109099549724981	1.714073557704318	target	3	0	stabilized	0.5388727350682186	4.450673702869817	2.0800963691079994	3979	0	3306	1	ACTH
SNRPA_HUMAN	37	1.5033488502083014	-2.4097839946204277e-4	-0.6194551654360567	1.002975730255088	0.5033259287633607	1.7126303876358409	target	0	1	destabilized	0.5380304270212891	0.5033259287633607	1.5033488502083014	3983	0	3309	1	ACTH
ANLN_HUMAN	37	3.107751640998367	2.4808738576192376e-5	-1.6270617189691374	2.648229119116199	2.434365440036004	1.7037326690152232	target	2	0	stabilized	0.5367437404117018	2.434365440036004	3.107751640998367	3990	0	3315	1	ACTH
CATA_HUMAN	67	0.9513952801800982	-1.7922908647883046e-4	-0.6125436217813041	1.0061478736086327	0.5360017576466797	1.7007927737711912	target	0	1	destabilized	0.5310944798730911	0.5360017576466797	0.9513952801800982	4030	0	3354	1	ACTH
MYH8_HUMAN	57	3.453326893869617	7.3114758567981575	1.1048336551089963	0.19505235343053332	2.0993749094196237	1.6976817628690366	target	5	0	stabilized	0.5292636515190133	3.0639218090954072	3.3495737289769654	4046	0	3369	1	ACTH
TCPH_HUMAN	57	1.5986045402438576	1.1456371216687832e-4	-0.8292013775596614	1.8282802329724654	1.6613804183916188	1.6962121183385308	target	3	1	stabilized	0.5283975993242163	2.4419420281651734	3.1623708594208306	4052	0	3374	1	ACTH
DNA2_HUMAN	47	-1.9643210538692957	-6.582421192133108e-5	-0.7251491639688257	1.0050604935971839	0.41616548963210803	1.6927520655836767	target	0	1	destabilized	0.526355645636116	0.41616548963210803	-1.9643210538692957	4076	0	3397	1	ACTH
H90B3_HUMAN	47	3.447436037470636	7.586506520391539	0.8988523980870552	0.38137502685611924	1.978539493063845	1.6865356724852893	target	3	0	stabilized	0.5226765270808049	5.961982565564551	4.606865780319534	4106	0	3426	1	ACTH
OSBL3_HUMAN	67	2.843113823006778	8.592485551179442e-4	-1.7733259290148031	2.777621805969977	2.2625552558592	1.6742303763157451	target	4	0	stabilized	0.5153535828587861	2.887938964622034	3.3657511649645233	4161	0	3480	1	ACTH
STAM1_HUMAN	37	3.1380187876043557	4.5863960532527525e-4	-1.134320536632528	2.143592742804613	1.988141851856644	1.6694490851314894	target	2	0	stabilized	0.5124936828604498	2.0248071232309983	3.1380187876043557	4181	0	3499	1	ACTH
LSM6_HUMAN	67	3.346299787819898	6.865720594513742	0.8366487244453404	0.37074903976001933	1.629328515967556	1.6619288519689863	target	1	0	stabilized	0.5079788868340183	1.629328515967556	3.346299787819898	4219	0	3536	1	ACTH
UAP1_HUMAN	42	3.362073887646428	5.123916724026972e-4	-0.7081726906464247	1.7148058266226893	1.6065408430071841	1.653954106268843	target	1	0	stabilized	0.5031688490997595	1.6065408430071841	3.362073887646428	4267	0	3583	1	ACTH
PRDX6_HUMAN	57	-0.5041904307857575	2.602476734362481e-5	-0.6789053140125991	1.6867395721407583	1.5723428489448517	1.6536484201734258	target	2	1	stabilized	0.5029840106290885	1.5723428489448517	3.5408259888044675	4270	0	3585	1	ACTH
SG2A1_HUMAN	57	-5.394326844536798	-3.917971884165094e-5	-0.7934642343280816	1.003633111462889	0.30403989957595157	1.6475981690556472	target	0	1	destabilized	0.49931857229952026	0.30403989957595157	-5.394326844536798	4295	0	3609	1	ACTH
CAPZB_HUMAN	67	3.408761370953141	-7.860177267275485	0.6951436419516028	0.7067556241903938	0.40196263991213443	1.645244455129038	target	0	1	destabilized	0.49788897811837907	0.40196263991213443	3.408761370953141	4303	0	3616	1	ACTH
RAB21_HUMAN	57	2.7268167882586063	6.712898342792831e-4	-0.997196710463238	2.0018706727113953	1.688382498820129	1.6446229262625063	target	2	0	stabilized	0.49751113378493167	1.9253292663193944	1.7065250135570986	4309	0	3621	1	ACTH
NR2C2_HUMAN	42	3.3913166448082968	7.238785029399185	0.9346305877975513	0.256530816231371	1.625274833603664	1.642625854126354	target	2	0	stabilized	0.49629609195800295	2.0045215297825365	3.3913166448082968	4323	0	3634	1	ACTH
DCTN1_HUMAN	67	1.5871752935606316	-2.684884283636605e-4	-1.3621877595426926	1.050022573451902	0.19529340145392793	1.6366071419596642	target	0	4	destabilized	0.4926252830021872	0.19529340145392793	2.3007002440079214	4352	0	3662	1	ACTH
RRP44_HUMAN	42	3.5327535289375067	0.00056600332770290055	-0.6129654903833854	1.6629609236542207	1.5432815245034988	1.632148536066442	target	3	0	stabilized	0.4898972671469189	5.531749173655	3.5327535289375067	4381	0	3690	1	ACTH
HIF1N_HUMAN	42	3.21115254258912	3.2574499210783365e-4	-1.1859099608239785	2.1902923596055235	1.9187200209543613	1.6195222546611034	target	2	0	stabilized	0.48213120122121766	1.9187200209543613	3.21115254258912	4445	0	3753	1	ACTH
PLAP_HUMAN	37	3.443690474983641	3.5993665229885414e-4	-0.873457495093688	1.8799030300411697	1.7458229870268984	1.6126145189394716	target	2	0	stabilized	0.4778567866633721	1.7458229870268984	3.443690474983641	4479	0	3786	1	ACTH
FAF1_HUMAN	37	3.259235261300194	-7.248370181312003	1.184615557698808	0.833080075508374	0.603364687194072	1.599513782425227	target	0	2	destabilized	0.4696996970788003	0.603364687194072	3.259235261300194	4568	0	3874	1	ACTH
IF5_HUMAN	57	2.956387496244866	2.376877822375481e-4	-0.7379025907575014	1.742567274280819	1.5692450010161911	1.5989702019060195	target	1	0	stabilized	0.46935979822227714	1.5692450010161911	2.956387496244866	4571	0	3876	1	ACTH
TRIR_HUMAN	67	3.205505579466607	1.6123468094670146e-4	-2.4988485211022065	3.962976916073597	3.704395255378498	1.5955352169577894	target	3	0	stabilized	0.46720923917058854	3.704395255378498	3.2151756153273996	4594	0	3898	1	ACTH
GLMN_HUMAN	42	3.3132704911738475	6.206167069552583e-4	-0.630122218308308	1.6337580993855416	1.5065942914664028	1.5929402443399368	target	2	0	stabilized	0.46558151882442717	1.6942942078443637	3.3132704911738475	4606	0	3909	1	ACTH
GNPI2_HUMAN	42	0.5278146366407047	1.550539357055855e-4	-1.8440010377622489	2.8578642418532962	2.4928349326833996	1.592203589748589	target	4	0	stabilized	0.4651189622537642	2.586185680028543	0.5278146366407047	4613	0	3915	1	ACTH
ACPH_HUMAN	52	3.6691421054187683	4.587842887359732	0.46439961446386846	0.7294360794875958	1.5276962442033235	1.5914520519600133	target	3	1	stabilized	0.46464683970841736	1.8011282717320096	3.355148782554959	4620	0	3921	1	ACTH
PDE12_HUMAN	52	2.5855995625913	1.3675770960784004e-4	-1.2459288362679222	2.254161836065213	2.064693692231846	1.587686889601648	target	3	0	stabilized	0.46227817058890097	6.4264213649681645	2.5855995625913	4641	0	3941	1	ACTH
NIT2_HUMAN	47	-9.069877042170937	1.6843117941197567e-5	-1.7764244665279036	2.779951972428577	2.5387806463590636	1.5826774046034964	target	1	0	stabilized	0.4591179727678563	2.5387806463590636	-9.069877042170937	4669	0	3968	1	ACTH
FLII_HUMAN	47	3.3004060895135154	7.021601361013776	1.162055567570349	-0.029334304760680715	1.5308900406717454	1.574137090227787	target	2	0	stabilized	0.45370724291648173	1.5581164289804994	3.3512927408406483	4714	0	4012	1	ACTH
ARPC2_HUMAN	62	4.005741237370865	2.4622375804464453e-4	-1.8061852868508872	2.8048633041725526	2.293728624269714	1.5701449610103877	target	2	0	stabilized	0.4511679469516436	2.293728624269714	3.4974218853358416	4739	0	4036	1	ACTH
CK054_HUMAN	47	-5.035273950304453	2.277300048400625e-5	-2.104792875916976	3.121823307782147	2.781540674657805	1.5649608172296527	target	1	0	stabilized	0.44786078676472785	2.781540674657805	-5.035273950304453	4776	0	4072	1	ACTH
NACP4_HUMAN	52	4.013396833507567	7.136038246438192	0.6834059464291138	0.602809981233593	1.6377255552770285	1.5588850763599793	target	3	0	stabilized	0.4439708711044406	1.9654537612881162	3.404119196379694	4810	0	4105	1	ACTH
ODPB_HUMAN	52	-8.839662911603826	3.853722717428984e-5	-0.7778108336318148	1.7923058034079127	1.6363983334166956	1.5569267866604755	target	1	0	stabilized	0.44271386969136073	1.6363983334166956	-8.839662911603826	4824	0	4118	1	ACTH
IF4E2_HUMAN	42	3.3663215046821513	6.547868130565852	0.7513773836667161	0.5356612198436677	1.5540442404344392	1.5519350741564129	target	2	0	stabilized	0.43950258722386987	2.238253653562246	3.4542994123309123	4853	0	4146	1	ACTH
HNRPD_HUMAN	42	3.4509899535512387	-7.7750923735074675	0.42763382991602095	0.7851910652055281	0.5697720408591341	1.550497713031216	target	0	1	destabilized	0.43857598456934976	0.5697720408591341	3.4509899535512387	4868	0	4160	1	ACTH
TPD52_HUMAN	47	3.2998483295911987	7.5910849886454015	1.010074088002542	0.08488154244793666	1.599702457002869	1.5503417047776333	target	1	0	stabilized	0.43847536132983705	1.599702457002869	3.2998483295911987	4872	0	4163	1	ACTH
KCNG3_HUMAN	47	3.6890379379037546	3.705921369431126	0.9982689942598384	0.35790897335040234	2.0913554108006904	1.545608857944568	target	4	0	stabilized	0.43541791553149	3.9782978813430674	3.236845238172798	4913	0	4203	1	ACTH
ATP5J_HUMAN	67	4.049267060872661	8.472860392829629	1.1691295318461712	0.26384235603671385	2.391208862594014	1.5453739579742651	target	1	0	stabilized	0.4352659250580747	2.391208862594014	4.049267060872661	4915	0	4204	1	ACTH
DP13A_HUMAN	52	-4.0901168755781	7.063463514649641e-5	-0.805153814403512	1.8058992324571814	1.5418430955706472	1.5429602254924726	target	1	0	stabilized	0.4337027956621789	1.5418430955706472	-4.0901168755781	4936	0	4224	1	ACTH
SYTC_HUMAN	52	2.5036392390154694	3.67988206916199e-4	-0.7465021889242143	1.7520163824405626	1.5795092472421757	1.5413432936397868	target	3	0	stabilized	0.43265430481762707	6.025022117315694	2.229261460334513	4946	0	4233	1	ACTH
PDCL3_HUMAN	42	3.1538545359560124	4.423099447321641e-4	-1.3320093431766789	2.332818691059283	1.9179021446166915	1.5383379018175813	target	2	0	stabilized	0.4307025490445374	1.9179021446166915	2.78023646762601	4957	0	4243	1	ACTH
HYOU1_HUMAN	37	3.0202588938027874	2.799123403073425e-4	-0.9340835905294201	1.9107105940527254	1.7775978435220947	1.5341544723047171	target	5	0	stabilized	0.4279793969004973	2.660978592586473	3.0202588938027874	4974	0	4259	1	ACTH
DDI2_HUMAN	52	2.0739003079668277	-1.9322396533202475e-4	-0.5198895468727096	1.0125585718494206	0.6523095258439799	1.5251329745096605	target	0	1	destabilized	0.42208160265776723	0.6523095258439799	2.0739003079668277	5022	0	4306	1	ACTH
SCOT2_HUMAN	47	3.4014625298544447	-7.885633255509256	0.4921142139781347	0.7756761843432605	0.63026579799376	1.5222764257972994	target	0	1	destabilized	0.42020686305191024	0.63026579799376	3.4014625298544447	5038	0	4321	1	ACTH
K2C6B_HUMAN	67	3.2442772478929767	0.0010370519469772548	-1.533821763708803	2.5314114765197173	2.2907060452946038	1.36645589471231	target	4	0	stabilized	0.42006788587764476	2.2907060452946038	4.330857654992768	5039	0	4321	1	ACTH
QOR_HUMAN	37	2.775256159307443	5.410903508295618e-4	-0.7430221300991149	1.7962594698669623	1.6268088407352304	1.5148909623332207	target	1	0	stabilized	0.41534346431393965	1.6268088407352304	2.775256159307443	5092	0	4373	1	ACTH
E41L2_HUMAN	57	2.048998326717228	1.4608331433751782e-4	-1.1472185288613395	2.1472746574843273	1.924210261477894	1.5017909637433549	target	2	0	stabilized	0.4066583717147887	1.924210261477894	4.047637551583442	5192	0	4472	1	ACTH
A16A1_HUMAN	47	-3.414131946461944	5.337291002414307e-6	-1.4748131065369587	2.5061770811122104	2.3138935527253066	1.4994775990912514	target	2	0	stabilized	0.4051167801765347	2.3138935527253066	3.4693946058706198	5207	0	4486	1	ACTH
NPM_HUMAN	57	3.406430051082413	6.566032205020604	0.5995041892403273	0.6610030720493648	1.5403076552496557	1.496543144497348	target	2	0	stabilized	0.4031578781638917	1.710670998058388	3.406430051082413	5231	0	4509	1	ACTH
TTL12_HUMAN	47	3.34697661447262	-7.168127192523643	1.0198820772265216	0.8218510557192602	0.28480062535817807	1.491100886605786	target	0	1	destabilized	0.39951469721302285	0.28480062535817807	3.34697661447262	5276	0	4553	1	ACTH
HDHD5_HUMAN	37	2.690882146508407	-4.98568852469568e-4	-0.41722445066328073	1.0038312677874492	0.651723982847428	1.4861773336857225	target	1	2	destabilized	0.3962072754378249	0.5303746951141416	2.690882146508407	5302	0	4578	1	ACTH
AMPL_HUMAN	37	2.359564856846162	-6.243129171603563e-4	-0.48765584046694654	1.0002602806183765	0.6588480964326221	1.4831655097318595	target	0	1	destabilized	0.3941786616026708	0.6588480964326221	2.359564856846162	5332	0	4607	1	ACTH
HIBCH_HUMAN	42	2.7938113785797394	-3.413294243866123e-5	-0.47913585595924557	1.0032723325655037	0.6455826989771386	1.4808453420344003	target	0	2	destabilized	0.39261310176677044	0.22003634043660172	2.7938113785797394	5348	0	4622	1	ACTH
APT_HUMAN	52	3.4172282569005974	5.59263136493955e-4	-0.68425606881354	1.6907937082895235	1.5419098125756834	1.4795927271326752	target	1	0	stabilized	0.3917668655360433	1.5419098125756834	3.4172282569005974	5352	0	4625	1	ACTH
RGS5_HUMAN	57	-35.0286494924189	8.4245481127671e-6	-2.2693131621060196	3.2677222693343113	2.5852461643295737	1.478193171397594	target	1	0	stabilized	0.3908205118190765	2.5852461643295737	-35.0286494924189	5362	0	4634	1	ACTH
CCAR1_HUMAN	52	1.344212535830015	1.4948526330191473e-4	-0.7274106830440217	1.7408169033627388	1.6075091251024078	1.4732389130230379	target	1	0	stabilized	0.38746331918443144	1.6075091251024078	1.344212535830015	5408	0	4679	1	ACTH
ARPC5_HUMAN	42	3.4930822652086078	7.69512999063754e-4	-0.6300561798923876	1.644193161636955	1.6503833866998259	1.4728908277733042	target	1	0	stabilized	0.38722701916917185	1.6503833866998259	3.4930822652086078	5412	0	4682	1	ACTH
IMA4_HUMAN	37	3.3333340579469968	6.575923893611716e-4	-0.9317112515116273	1.9264140310953726	1.7673336941419273	1.472562953280631	target	1	0	stabilized	0.38700438828211714	1.7673336941419273	3.3333340579469968	5415	0	4684	1	ACTH
AN36A_HUMAN	57	1.2266299174831858	-5.03860536820658e-4	-0.9537326543134916	1.0629954448830614	0.5065530932874359	1.4705604218101036	target	0	1	destabilized	0.38564356746399886	0.5065530932874359	1.2266299174831858	5423	0	4691	1	ACTH
DYL2_HUMAN	57	1.7713558871286872	1.6078137193956834e-4	-1.4972354220676243	2.5103647621350853	2.3272021242937577	1.4446737194992394	target	5	0	stabilized	0.3840268822197961	3.86611753504131	0.8337404627503939	5439	0	4706	1	ACTH
RD23B_HUMAN	52	3.5161577062372564	5.705577864329995	0.5295095242044511	0.7001878800063858	1.5213623549132265	1.4584585563259151	target	5	0	stabilized	0.3825425328127063	1.7630604945993904	3.2364887737824293	5455	0	4721	1	ACTH
CUTA_HUMAN	42	2.1481025010454577	0.10531631055316049	-3.7499273193189318	4.756629928744701	3.1276975060977628	1.4643930608945301	target	2	1	stabilized	0.38144086372125735	3.1276975060977628	2.1481025010454577	5469	0	4734	1	ACTH
PSIP1_HUMAN	37	0.42055170734834707	1.1103563776544061e-4	-2.7932155397493443	3.791065321948711	3.2779300431237104	1.4620585098468022	target	2	0	stabilized	0.37984538094184067	3.2779300431237104	0.42055170734834707	5488	0	4752	1	ACTH
TGT_HUMAN	47	3.623209675968016	1.3038992360089795e-4	-1.988607961737402	2.9952907098899666	2.773277344032578	1.4611919371959554	target	1	0	stabilized	0.37925249799053046	2.773277344032578	3.623209675968016	5494	0	4757	1	ACTH
RTF1_HUMAN	37	-1.120630443264591	-1.420950524422726e-4	-0.9512197162971756	1.042646408681701	0.3824439735495349	1.4598179726297913	target	0	1	destabilized	0.3783117516665466	0.3824439735495349	-1.120630443264591	5510	0	4772	1	ACTH
IF2B1_HUMAN	37	3.1630338380761773	5.129971937372311e-4	-1.1694971381029524	2.2003517974807303	2.1020968517122136	1.4489656441630039	target	1	0	stabilized	0.3708499530250246	2.1020968517122136	3.1630338380761773	5595	0	4856	1	ACTH
ARP5L_HUMAN	42	3.867071564043944	-4.810340158315163	0.3413010497623472	0.8902890127255312	0.607501429152592	1.4450237544058027	target	0	2	destabilized	0.36812576046443357	0.5582075867800977	3.141505772292829	5623	0	4883	1	ACTH
CASP3_HUMAN	57	2.862976157196147	-9.657907344683737e-4	-0.6453908460721955	1.0118903999875124	0.5835775037541729	1.443637272702201	target	0	2	destabilized	0.36716581272597576	0.5835775037541729	2.862976157196147	5635	0	4894	1	ACTH
GRM7_HUMAN	67	1.0770674687460362	0.1241900035951143	-14.003891153139307	15.029528644493686	7.811236774092403	1.4414503565451158	target	1	0	stabilized	0.3656497987555407	7.811236774092403	1.0770674687460362	5648	0	4906	1	ACTH
2ABG_HUMAN	52	3.475878729723029	8.05782949770621	1.0146980340268252	0.14892887413822636	2.069199696544769	1.440654410141661	target	4	0	stabilized	0.3650974618433714	3.831014310001626	3.3908673071509416	5654	0	4911	1	ACTH
H1X_HUMAN	47	-0.40433485825289656	0.12166686164761963	-2.207658815898312	3.2291261535490685	1.8102819560084251	1.437812814473315	target	2	0	stabilized	0.36312308008412497	1.8195141463838942	1.5306089974172947	5671	0	4927	1	ACTH
NACC1_HUMAN	42	1.8655196341890232	3.2675805477182755e-4	-5.09302945303662	5.649013529159522	4.386743762630475	1.4334829423747995	target	2	0	stabilized	0.3601071069853837	4.386743762630475	1.8655196341890232	5709	0	4964	1	ACTH
H31T_HUMAN	37	1.8741367548126318	-2.411788333751432e-4	-0.6176880297555463	1.001715554285129	0.49405103643391934	1.4318717542931798	target	0	1	destabilized	0.3589825074701458	0.49405103643391934	1.8741367548126318	5724	0	4978	1	ACTH
PLSL_HUMAN	67	0.43232058657914035	-1.8766974533768863e-4	-0.6998338219202525	1.0324829828185116	0.5882766887787452	1.4311339113219492	target	0	1	destabilized	0.3584670750374214	0.5882766887787452	0.43232058657914035	5733	0	4986	1	ACTH
EHD4_HUMAN	42	3.0806902005948307	3.519932032568812e-4	-1.099398358772328	2.108707165248703	1.8356580616638591	1.4288291169220442	target	1	0	stabilized	0.35685530951731437	1.8356580616638591	3.0806902005948307	5752	0	5004	1	ACTH
SAHH2_HUMAN	37	-8.631856629449445	0.053003487624058224	-12.410033457279656	13.41373656984433	4.102806420733339	1.4267742465670064	target	1	0	stabilized	0.3554161245548713	4.102806420733339	-8.631856629449445	5767	0	5018	1	ACTH
ACTN2_HUMAN	37	2.898753663876568	1.2168657001485129e-4	-2.192186002662996	3.3974499584931666	3.3819231653656026	1.4246573557073616	target	4	0	stabilized	0.35393133267217947	4.288856024752142	2.898753663876568	5784	0	5034	1	ACTH
RMP_HUMAN	42	3.2680624921373456	-7.44787007061214	1.0206822569650156	0.8417221389379086	0.6353735927463904	1.418547801013736	target	0	1	destabilized	0.3496336729815015	0.6353735927463904	3.2680624921373456	5841	0	5090	1	ACTH
SETD3_HUMAN	67	2.0405934346015826	7.951529706383095e-5	-3.6866898576149647	4.685045312411958	3.937779047057835	1.4176458462266477	target	2	0	stabilized	0.34899764108123116	3.937779047057835	2.5610000749221706	5850	0	5098	1	ACTH
PIN4_HUMAN	67	3.700768222823921	4.088919460456348	0.4905674697045266	0.7273739595294197	1.5237406973969772	1.4012336057906811	target	2	0	stabilized	0.33735299563244076	2.3004348317913137	3.3400871221207655	5979	0	5226	1	ACTH
CATD_HUMAN	67	2.948037878339399	-4.5259846182158495e-4	-1.0025603335123792	0.94211174876018	0.28566168518999796	1.3999106324056074	target	0	1	destabilized	0.336408400587742	0.28566168518999796	2.948037878339399	5987	0	5233	1	ACTH
TPM4_HUMAN	67	3.50053820638146	7.348776359603479	0.5114108066400178	0.7485570620772333	1.6411627599457033	1.3864837264918166	target	1	0	stabilized	0.3267708488910876	1.6411627599457033	3.50053820638146	6078	0	5323	1	ACTH
NUCB2_HUMAN	37	3.3754723028914486	-6.921291723185684	0.76504058612991	0.7555590116876506	0.3047248214446656	1.3848914566711858	target	0	2	destabilized	0.32562176593364034	0.3047248214446656	3.3754723028914486	6092	0	5336	1	ACTH
KCNB2_HUMAN	47	3.3871581373259825	-6.1068666615192395	0.5183500919026809	0.9118044147906044	0.6131940086829866	1.3827589334501416	target	0	1	destabilized	0.32408073051191183	0.6131940086829866	3.3871581373259825	6115	0	5358	1	ACTH
RAB8A_HUMAN	47	1.4402757642751474	1.14295537828958e-4	-1.1930432670166673	2.2030605219169903	2.182667796574584	1.3787180551731815	target	2	0	stabilized	0.32115412190514314	2.1917567733821013	1.4402757642751474	6144	0	5386	1	ACTH
PURA_HUMAN	37	3.319471097575902	-7.138418887382149	0.5425819297706161	0.8854293550896805	0.6498222985159827	1.361063464980892	target	0	1	destabilized	0.30826635372165506	0.6498222985159827	3.319471097575902	6306	0	5547	1	ACTH
BRCC3_HUMAN	67	2.1310014878702264	-9.408030414182144e-5	-0.8366208088832872	1.0013786769924689	0.37502252396820246	1.3549204326815312	target	0	3	destabilized	0.3037427313392604	0.37502252396820246	3.056310806167517	6367	0	5607	1	ACTH
NFH_HUMAN	67	3.2368679765340955	8.58451868896168e-4	-1.4206138668316468	2.442462527631751	2.2687486139853776	1.3532558724603716	target	2	0	stabilized	0.3025134462091788	2.2687486139853776	3.1738849739811466	6374	0	5613	1	ACTH
CYFP1_HUMAN	52	3.410782606186384	5.179615548383022e-4	-0.655561188917428	1.6599513876858298	1.562520518629161	1.349223873215134	target	1	0	stabilized	0.29952951839741715	1.562520518629161	3.410782606186384	6406	0	5644	1	ACTH
ECHM_HUMAN	47	2.733680543562673	0.016319195889139066	-0.6534666551413886	1.654479914617089	1.546335488127487	1.3475775980288585	target	3	0	stabilized	0.2983086088063127	3.4165351094024397	2.733680543562673	6420	0	5657	1	ACTH
XRN2_HUMAN	52	3.3902516658688935	-7.865809899229975	0.6525008896632063	0.7945028815951802	0.5134528804925093	1.347563890500192	target	0	1	destabilized	0.2982984367773303	0.5134528804925093	3.3902516658688935	6421	0	5657	1	ACTH
PYGB_HUMAN	37	2.5452022861768953	3.0102781711906625e-4	-1.0513691284229716	2.0395388535983163	1.9391086062665206	1.3452555178459045	target	1	0	stabilized	0.2965839711042388	1.9391086062665206	2.5452022861768953	6449	0	5684	1	ACTH
SRSF6_HUMAN	37	3.217168970000155	-6.982299109354748	1.9045165703409763	0.8700657229506176	0.5717321496127074	1.3444609605160815	target	0	2	destabilized	0.29599315987240293	0.4386508667301599	3.217168970000155	6454	0	5688	1	ACTH
EF1D_HUMAN	52	-0.9453181304008444	4.449607520525758e-5	-1.2395191708086082	2.2347303388360196	2.0946380179274513	1.3443455588186353	target	1	0	stabilized	0.2959073212695229	2.0946380179274513	-0.9453181304008444	6460	0	5693	1	ACTH
LPPRC_HUMAN	62	-2.009010119037568	0.012449551704948393	-2.0969547697689306	3.112108212865246	2.5333860547704212	1.3441800687336363	target	4	0	stabilized	0.2957842128390047	2.5333860547704212	3.364482992960197	6463	0	5695	1	ACTH
SEH1_HUMAN	57	2.9353967528473297	-1.971272380813635e-4	-0.47704488951894486	1.0029564934114512	0.5615153493796825	1.3412123674358727	target	0	1	destabilized	0.29357395673941145	0.5615153493796825	2.9353967528473297	6490	0	5721	1	ACTH
TKFC_HUMAN	37	3.581904781183664	5.732601828889669e-4	-2.5661043244738675	3.567237370397077	3.3093355804223394	1.3402215086619609	target	3	0	stabilized	0.29283490527307127	3.3093355804223394	3.581904781183664	6498	0	5728	1	ACTH
PABP2_HUMAN	47	-0.6392218028541055	-1.335178491193772e-4	-0.9533452374867084	1.0020423417581648	0.20026008980141793	1.3339162498101709	target	0	2	destabilized	0.2881191642708607	0.20026008980141793	3.191590170870596	6555	0	5784	1	ACTH
COPZ1_HUMAN	37	3.3712966603815047	6.783859369608605	0.6895430027940145	0.5450548362068782	1.6023304059475616	1.3306730097142523	target	2	0	stabilized	0.28568483658907445	2.5193963495967444	3.3712966603815047	6599	0	5827	1	ACTH
ARPC4_HUMAN	62	3.57099866545414	2.982880140041942e-4	-2.0590034598392326	3.059655155870718	2.5023285087610505	1.3271804572607766	target	1	0	stabilized	0.28305673499724254	2.5023285087610505	3.57099866545414	6625	0	5852	1	ACTH
CB39L_HUMAN	52	4.044665521388878	6.85032917834241	0.7970264059998883	0.41759447627609536	1.704430129139676	1.326510132753244	target	3	1	stabilized	0.28255153327982135	3.3079784237075014	4.320451021240894	6634	0	5860	1	ACTH
FGR_HUMAN	52	4.042532205507233	8.373839921914717	0.8833760042022756	0.3898372845162908	1.9945348981547997	1.3241443184991732	target	1	0	stabilized	0.28076645346213547	1.9945348981547997	4.042532205507233	6657	0	5882	1	ACTH
DYR2_HUMAN	67	3.3710805424294983	5.986604247119411e-4	-1.1259144624194812	2.1424943001282677	1.8874623027286466	1.3225577555695807	target	1	0	stabilized	0.2795675553049344	1.8874623027286466	3.3710805424294983	6669	0	5893	1	ACTH
MANF_HUMAN	57	3.1109062517661825	2.407537404906003e-4	-0.7782707003140585	1.7861552954637419	1.7081090217251393	1.3128234666229353	target	2	0	stabilized	0.2721801358799735	2.1822757550661858	3.1109062517661825	6773	0	5996	1	ACTH
CDK16_HUMAN	37	1.6935947432572342	-1.0716071593611955e-4	-0.962420390340159	1.010054471536075	0.23752077938871408	1.3093442596851241	target	0	2	destabilized	0.2695264467626543	0.23752077938871408	1.6935947432572342	6819	0	6041	1	ACTH
TBB2A_HUMAN	52	3.5201714986328874	6.633263796128079	0.5304857855321529	0.6972458577375894	1.567656594948596	1.3045650332225518	target	2	0	stabilized	0.26586967733980166	3.3700727266549957	3.5201714986328874	6854	0	6075	1	ACTH
DEST_HUMAN	37	3.5560573503089885	7.273452612435804e-4	-1.3540540313848295	2.514349383486151	2.3368485836437056	1.298212370878377	target	1	0	stabilized	0.2609882188264707	2.3368485836437056	3.5560573503089885	6912	0	6132	1	ACTH
IF2B_HUMAN	37	0.9190961476410273	1.9861288363908465e-4	-1.1529144478248117	2.1637020513641425	1.8779406602136002	1.2970283395354627	target	1	0	stabilized	0.26007575516149023	1.8779406602136002	0.9190961476410273	6927	0	6146	1	ACTH
AXA81_HUMAN	57	4.095659399659484	8.49299196400262	1.235565678156372	0.3390843518443331	2.7180350669312743	1.2941836283542962	target	2	1	stabilized	0.2578800935488826	2.7180350669312743	3.9808421811870347	6956	0	6174	1	ACTH
RT27_HUMAN	62	0.49070358927131735	2.392128312557182e-4	-2.346192397130591	3.3745656270824558	2.792649622323405	1.2928200202132458	target	6	0	stabilized	0.2568258945970636	3.3729755653811977	3.3072110435107516	6967	0	6184	1	ACTH
NAA15_HUMAN	57	4.904475753350839	0.12261816727461235	2.054386258799969	-0.6662184185280405	2.470655381701716	1.2840395756605358	target	1	0	stabilized	0.2500110269583026	2.470655381701716	4.904475753350839	7057	0	6273	1	ACTH
FYN_HUMAN	42	3.2921181486155997	-7.2416286019246305	1.196632716013503	0.7784994789031037	0.3182893279529869	1.2819536689647044	target	0	2	destabilized	0.24838521819230863	0.3182893279529869	3.2921181486155997	7087	0	6302	1	ACTH
SUMO2_HUMAN	62	3.934971544669608	6.363740020191963e-5	-0.9447257837645464	1.9451764711215445	1.7837438169322324	1.2804242912206343	target	3	1	stabilized	0.24719150052111208	1.7837438169322324	3.580054207052584	7101	0	6315	1	ACTH
RL6_HUMAN	52	3.7017717640593166	4.849088018321344	0.728330564808279	0.6466486501595241	1.9135947325224485	1.2761553902250804	target	3	0	stabilized	0.24385195668137707	3.2522587618101046	3.1459906923602383	7146	0	6359	1	ACTH
TPT1L_HUMAN	42	3.601826810544771	-2.655738949547868e-4	-0.7284319679216686	1.002551868967584	0.4287941137811871	1.2711400706742293	target	0	2	destabilized	0.23991419122898924	0.4287941137811871	3.601826810544771	7192	0	6404	1	ACTH
F10A1_HUMAN	47	3.5147046995171585	8.06737676265228	0.6528547788092022	0.7031385569124547	1.8036616739533784	1.2634609542774218	target	2	1	stabilized	0.23385474454108435	1.8036616739533784	3.2822923846327323	7282	0	6493	1	ACTH
M3K3_HUMAN	52	5.916711274328106	0.159673277147233	1.2317378704760862	-0.052848231283441606	2.0186411277615623	1.263315932314381	target	1	0	stabilized	0.23373995643773451	2.0186411277615623	5.916711274328106	7285	0	6495	1	ACTH
1433G_HUMAN	67	3.4288477510753648	-9.109592473899774	0.582754116021917	0.6964875501555279	0.3918211365938417	1.2561623608978798	target	1	3	destabilized	0.22806132792238518	0.3918211365938417	3.20435821037581	7360	0	6569	1	ACTH
LEG3_HUMAN	42	3.4247459572246077	-8.65561081611375	0.6973914451797092	0.6420737605715239	0.3523205382993303	1.2552252141711777	target	0	2	destabilized	0.22731501000674065	0.3523205382993303	3.21421196663923	7368	0	6576	1	ACTH
RBM19_HUMAN	37	0.4832002996381153	6.816400721336927e-5	-1.6143031350588488	2.6171073303109136	2.4007863571988253	1.2544160765188004	target	3	0	stabilized	0.22667018663424082	2.5806879813276944	0.4832002996381153	7378	0	6585	1	ACTH
MSS4_HUMAN	42	3.354801322724935	6.851429682969193	0.6712329715626738	0.5701863184966663	1.5326584088924804	1.2494480971476019	target	2	0	stabilized	0.22270193153262863	2.158650213666229	3.354801322724935	7438	0	6644	1	ACTH
COR1C_HUMAN	67	0.4287435219647023	3.780142256775128e-5	-4.312612824151771	5.293703058729886	4.5520532591919975	1.2488928560267192	target	1	0	stabilized	0.22225744365813033	4.5520532591919975	0.4287435219647023	7445	0	6650	1	ACTH
URB2_HUMAN	57	1.9178597604111718	0.11961020111384187	-3.3778476292190023	4.380447198822385	2.78917318276369	1.2418197907185244	target	3	0	stabilized	0.2165778769440029	3.2622188068261826	4.706754701373369	7519	0	6723	1	ACTH
WDR44_HUMAN	37	3.321853558227637	1.6947221327934717e-4	-4.282137263018064	5.283905301234873	4.889815655038763	1.2396906761439541	target	3	0	stabilized	0.21486189377532325	4.889815655038763	3.321853558227637	7539	0	6742	1	ACTH
RENT1_HUMAN	42	-2.5852103752838342	5.929974221755195e-5	-1.1228647136025691	2.184176490331326	1.9432631153042554	1.2376815432430215	target	1	0	stabilized	0.21323990631160175	1.9432631153042554	-2.5852103752838342	7569	0	6771	1	ACTH
TAGL3_HUMAN	57	4.118938784396995	8.670222512821233	0.7803365159971805	0.6361141781206698	1.8045762841148638	1.2367647568024738	target	4	0	stabilized	0.2124989029748307	2.469304263614015	3.3018577593686103	7582	0	6783	1	ACTH
ROA2_HUMAN	67	2.007836152279613	-3.1853147984687875e-4	-1.0626753197336902	1.024696265178573	0.28943522173992264	1.231932293046696	target	1	3	destabilized	0.20858390665852308	0.28943522173992264	3.024244849810126	7643	0	6843	1	ACTH
MIF_HUMAN	57	3.321052271839197	4.938365388640261e-4	-1.0775694977074866	2.0489446937750686	1.9647662607103347	1.2275554589793305	target	1	0	stabilized	0.2050247600971601	1.9647662607103347	3.321052271839197	7688	0	6887	1	ACTH
PUR2_HUMAN	52	0.03002427414775135	7.193747076237366e-5	-1.2529368959509666	2.2544561590025585	2.1231268206176095	1.2274072351062653	target	2	0	stabilized	0.2049040056159597	5.803604491421812	1.5600032797929224	7689	0	6887	1	ACTH
DHX9_HUMAN	52	-0.003582749983168362	1.4426276574457976e-4	-0.7509760207570977	1.7561767922793536	1.6354388811903682	1.222686783935725	target	1	0	stabilized	0.20105071919139716	1.6354388811903682	-0.003582749983168362	7746	0	6943	1	ACTH
MBB1A_HUMAN	47	3.5609316228229755	7.909135407223757	0.5034251209919359	0.5620642514034023	1.5952772930019363	1.2212382677201576	target	5	0	stabilized	0.19986531754890052	3.3990412752148997	3.3226337110212834	7763	0	6959	1	ACTH
HUTU_HUMAN	42	3.917634951049104	6.40608688024888	1.5168805969671024	0.28143687475900825	2.654809383063598	1.2175898640505936	target	1	0	stabilized	0.19687338355925674	2.654809383063598	3.917634951049104	7804	0	6999	1	ACTH
ARHG5_HUMAN	47	3.1130325272301054	1.228043102058659e-4	-1.3821035191375923	2.4129284375752276	2.0702267329101627	1.2155039485272774	target	1	0	stabilized	0.1951587632486309	2.0702267329101627	3.1130325272301054	7824	0	7018	1	ACTH
ABCF1_HUMAN	52	3.347314843995211	6.892313363843067	1.3588824162329673	0.08476518100956007	2.0617132567620944	1.213002256943966	target	4	0	stabilized	0.19309849058999745	4.3833181620111015	3.1808751371746378	7865	0	7058	1	ACTH
CSN6_HUMAN	37	3.492843217865381	8.674464458872389e-5	-0.7551180199823455	1.7563146141453787	1.6625127734514051	1.2126699666355747	target	1	0	stabilized	0.19282451267390494	1.6625127734514051	3.492843217865381	7872	0	7064	1	ACTH
KI13B_HUMAN	67	1.900408521318327	-6.698811501143835e-5	-1.2042517369190833	1.041018579799792	0.09018765428428742	1.2109895365991683	target	0	2	destabilized	0.19143782423566585	0.0892673684163998	3.126458160629057	7894	0	7085	1	ACTH
SHOT1_HUMAN	52	3.3834857642812826	7.906602936657176	0.7099611206380001	0.4002785003661917	1.7051458195824485	1.202361082454487	target	1	0	stabilized	0.1842871923780016	1.7051458195824485	3.3834857642812826	8011	0	7201	1	ACTH
TRI25_HUMAN	47	3.323130499640539	-5.36097048201652	0.9217615482654548	0.8828885470980844	0.46464940477060446	1.2003972414892476	target	0	1	destabilized	0.18265253658847197	0.46464940477060446	3.323130499640539	8025	0	7214	1	ACTH
SKP1_HUMAN	42	3.4493984336790424	7.925052523148858	0.527471805392367	0.7522613453203071	1.5976403627306535	1.2003661943540564	target	2	0	stabilized	0.18262667220322734	1.5976403627306535	3.4493984336790424	8028	0	7216	1	ACTH
KAT3_HUMAN	47	2.4113860558963656	1.0244407047251706e-4	-0.9672851890935301	1.968087742965974	1.9530903119242342	1.1958761371295055	target	2	0	stabilized	0.17887908589230164	2.0599410492546513	2.4113860558963656	8090	0	7277	1	ACTH
SYEP_HUMAN	52	3.449671835170292	7.456485611387706	0.827685795782654	0.43527859329114277	1.8813799322123077	1.1919374686250779	target	4	0	stabilized	0.17558010805997626	3.503375660274673	3.449671835170292	8138	0	7324	1	ACTH
ARL8A_HUMAN	37	1.306748657973124	9.074834643787924e-5	-12.22514045367393	13.384281086559039	14.032846974178117	1.19054241064155	target	2	0	stabilized	0.17440901053667027	14.032846974178117	1.306748657973124	8154	0	7339	1	ACTH
NPS3A_HUMAN	57	3.2174176730829993	6.24830079373169e-4	-0.5850383919539939	1.5977767256029216	1.5204027446041437	1.1875878515939982	target	1	0	stabilized	0.1719242344799352	1.5204027446041437	3.2174176730829993	8191	0	7375	1	ACTH
NWD1_HUMAN	37	3.3634898558013293	6.397692380502875	0.7564196457654823	0.4075066835160316	1.5510153229147159	1.1875486607951506	target	2	0	stabilized	0.17189123359880973	1.636389059265176	3.3634898558013293	8192	0	7375	1	ACTH
SRRM1_HUMAN	57	3.5095146187501527	-9.099697091346519	0.3205930174797851	0.8319071334957386	0.5585228009580451	1.1056177638932	target	0	3	destabilized	0.16757277404666968	0.5585228009580451	2.421855781121693	8269	0	7451	1	ACTH
EP15R_HUMAN	37	4.249272956144607	8.180294097990237e-4	-1.0256591347565767	2.033198151272499	1.9410712991970303	1.178885926773563	target	4	0	stabilized	0.16456986265334575	2.9087559727899537	4.249272956144607	8317	0	7498	1	ACTH
LDHA_HUMAN	62	3.1964856395533374	9.519128810967973e-4	-1.2131254578598538	2.213651483350854	1.8682569625473402	1.1774543115258913	target	1	0	stabilized	0.16335474490375074	1.8682569625473402	3.1964856395533374	8334	0	7514	1	ACTH
PR40B_HUMAN	57	3.5094834069128757	10.099777079275894	1.2350911163455676	0.4538654355237233	2.481086290380852	1.175245903677532	target	2	1	stabilized	0.16147740542573455	6.6247174881660955	3.339314550373675	8363	0	7542	1	ACTH
RL32_HUMAN	47	3.419246234307711	-6.467698249913742	0.571264418294576	0.8917724681131011	0.493504728652506	1.1736046371784432	target	0	2	destabilized	0.16007989908153772	0.3203074502971615	3.452113418865177	8386	0	7564	1	ACTH
DHX16_HUMAN	42	3.4135195609875693	7.561017070263832	0.685597298433101	0.49628517825639873	1.7455776673847574	1.169419762049412	target	1	0	stabilized	0.1565076959234757	1.7455776673847574	3.4135195609875693	8447	0	7624	1	ACTH
GDIB_HUMAN	67	0.3786206930834411	-2.205845265190526e-4	-0.755347127529713	1.037659367421536	0.4268051707826693	1.1657350036611176	target	0	1	destabilized	0.15335179251127665	0.4268051707826693	0.3786206930834411	8492	0	7668	1	ACTH
NIT1_HUMAN	37	3.3796879365325467	-7.944548530592513	0.8345745016637006	0.5851541999506585	0.3474026562624421	1.163380913001887	target	0	1	destabilized	0.1513303461384235	0.3474026562624421	3.3796879365325467	8525	0	7700	1	ACTH
COA6_HUMAN	67	3.4754193295528792	6.606509657606205	0.8208039053142816	0.48913468507077285	1.9514438626402635	1.1629912977305303	target	1	0	stabilized	0.15099539090365752	1.9514438626402635	3.4754193295528792	8538	0	7712	1	ACTH
PDE6D_HUMAN	42	1.0370756741936158	-2.8183770559393126e-5	-0.5726998966236365	1.001358805394296	0.602102949186716	1.162030050028279	target	0	2	destabilized	0.15016851870487408	0.602102949186716	1.0370756741936158	8554	0	7727	1	ACTH
UBE2T_HUMAN	57	3.2662678647705636	-7.088840123004169	1.1435324928349948	0.8038423932293113	0.5251334747608314	1.1595557733509114	target	0	1	destabilized	0.1480369777648263	0.5251334747608314	3.2662678647705636	8589	0	7761	1	ACTH
PSF2_HUMAN	52	3.334078874772758	6.403477464657131	1.021117479502537	0.25208186438911034	1.764098584464703	1.1538639203320482	target	3	0	stabilized	0.14311624114323962	3.1006457184045098	3.318860680929585	8667	0	7838	1	ACTH
ADK_HUMAN	37	3.009751368424538	4.7276661678320844e-4	-0.9268187845576294	1.9353423043523863	1.777011521018673	1.151493180495542	target	2	0	stabilized	0.14105951798190144	1.777011521018673	3.009751368424538	8694	0	7864	1	ACTH
ERO1A_HUMAN	57	1.4707324580915033	-2.4764218592726513e-4	-0.515806441467924	0.9978556184802605	0.5486329092347051	1.1460130771592656	target	0	1	destabilized	0.13628902936118095	0.5486329092347051	1.4707324580915033	8782	0	7951	1	ACTH
EDF1_HUMAN	67	3.179009407758814	4.237298507300196e-4	-1.523017180964163	2.534652498955074	2.3197100767747316	1.1457004623796887	target	1	0	stabilized	0.13601620749568824	2.3197100767747316	3.179009407758814	8786	0	7954	1	ACTH
FTO_HUMAN	42	-3.621790433247754	-1.5759761508724404e-4	-0.6971425793376869	0.5037346611093387	0.12152022392159893	1.1430232188752938	target	0	3	destabilized	0.13367669858298256	0.10811181977153135	1.7971999217173247	8829	0	7996	1	ACTH
RANDOM14018	42	3.5875685662969934	8.527784950502899e-4	-2.230398852371608	3.0047102657843663	2.7112025454740185	1.1408722423832833	target	1	0	stabilized	0.13179309474518644	2.7112025454740185	3.5875685662969934	8867	0	8033	1	ACTH
GPD1L_HUMAN	42	-1.1764323594088184	1.0336372988684929e-4	-0.9794218725742401	1.9909391885622043	1.725198793456126	1.1358402460658148	target	1	0	stabilized	0.12737268194665893	1.725198793456126	-1.1764323594088184	8944	0	8109	1	ACTH
MARCS_HUMAN	57	3.5027973291934287	8.902142962467025	0.582193586349007	0.7322074362563574	1.7319397766171547	1.1302107809325712	target	5	0	stabilized	0.12240414712809192	2.273135270074037	3.1300094934201064	9016	0	8180	1	ACTH
HTSF1_HUMAN	67	4.046352395505226	7.3032711271918975	0.8370661970932851	0.4481897622746114	1.9412050237925262	1.1276559496614045	target	1	0	stabilized	0.12014109738568954	1.9412050237925262	4.046352395505226	9055	0	8218	1	ACTH
C1QBP_HUMAN	57	2.538207425590241	-2.7460844699094136e-4	-1.0849128982382636	1.004510166499673	0.20627693534974342	1.1223667921992153	target	1	3	destabilized	0.11543966294577522	0.0939288543453601	2.538207425590241	9136	0	8298	1	ACTH
EXOS4_HUMAN	42	3.335209706253442	-6.355366672774088e-4	-1.1335405667351262	1.0926038109187626	0.34689197937825283	1.1191150943894759	target	0	1	destabilized	0.11253827872289209	0.34689197937825283	3.335209706253442	9178	0	8339	1	ACTH
I5P2_HUMAN	57	4.134469525771149	7.040779385841624	0.5550868945590426	0.5420298090720019	1.6310882823484465	1.1118251520378406	target	2	0	stabilized	0.10600294608925583	2.0315756656788553	4.134469525771149	9293	0	8453	1	ACTH
MCM3_HUMAN	37	-19.7930785209629	2.8323725486707558e-6	-2.6367011607651065	3.6421347530457346	4.035891666962642	1.1117351371176234	target	3	0	stabilized	0.10592198141228673	5.018646261643092	4.09433480730523	9294	0	8453	1	ACTH
SSDH_HUMAN	37	-9.591886364924834	4.067711234442916e-6	-1.4005076345304586	2.399513072081169	2.326311182475739	1.111615153071049	target	2	0	stabilized	0.10581405055926697	2.326311182475739	5.15018186057162	9295	0	8453	1	ACTH
CAN2_HUMAN	67	3.3791562003056708	7.887531212456787	0.7637270442209947	0.4324577914844856	1.636739015843355	1.107508562377768	target	2	0	stabilized	0.1021129541738753	1.8161186827035778	4.472417772631857	9376	0	8533	1	ACTH
UGDH_HUMAN	52	2.7290950080978784	3.126453051110135e-4	-1.3914178859055253	2.4035933586243603	2.1659349599249516	1.105517493938749	target	1	0	stabilized	0.10031354564854757	2.1659349599249516	2.7290950080978784	9407	0	8563	1	ACTH
COA7_HUMAN	42	3.280537028683578	-4.4599658553101467e-4	-0.44796174164521707	1.002896021615645	0.6315127238762543	1.103105352498527	target	0	1	destabilized	0.09812925021470317	0.6315127238762543	3.280537028683578	9437	0	8592	1	ACTH
SNX3_HUMAN	47	3.056089932807179	1.9365042722733933e-4	-1.550422217245295	2.5554886898830746	2.23152923103187	1.1005683990823387	target	1	0	stabilized	0.0958267727856804	2.23152923103187	3.056089932807179	9474	0	8628	1	ACTH
PYRG1_HUMAN	57	-1.079098500915171	9.834451267059794e-5	-0.6747979509307112	1.6875365509504066	1.5687757440485186	1.0914546604986213	target	3	0	stabilized	0.08751135743564258	6.824166896591395	2.447121543803478	9620	0	8773	1	ACTH
PPM1B_HUMAN	52	3.1173589851338157	7.49742729960935e-4	-2.2220047664336575	3.2862005122360163	3.204830857166808	1.087581380907141	target	2	0	stabilized	0.08395631419891225	3.204830857166808	0.19017858017098904	9702	0	8854	1	ACTH
RBM25_HUMAN	67	-0.26348249695758363	3.778656439572837e-5	-6.372102735670782	7.408526976013687	7.486013763087961	1.08640776745797	target	4	0	stabilized	0.08287662751872552	7.486013763087961	4.333465031366453	9719	0	8870	1	ACTH
RL18_HUMAN	42	3.4226661151443385	6.110262155644032	0.6523579648624036	0.5547814419519872	1.500950624117502	1.0791577686601266	target	4	0	stabilized	0.07618089306652856	3.36767914149834	3.367405198934982	9838	0	8988	1	ACTH
OFD1_HUMAN	42	3.6969100841846942	5.549116295728134	1.265590891307875	0.39817666524098805	2.446765038351361	1.0757800675822584	target	1	0	stabilized	0.0730460426896899	2.446765038351361	3.6969100841846942	9897	0	9046	1	ACTH
ACLY_HUMAN	57	3.4459002996288373	-8.369614839191064	0.5115127938839403	0.8614854754926298	0.6175237801841607	1.074192175995055	target	0	1	destabilized	0.07156891489823472	0.6175237801841607	3.4459002996288373	9926	0	9074	1	ACTH
PHAX_HUMAN	67	0.47780263872409995	9.987521907794542e-5	-1.2457914804695172	2.267704024533313	2.047105585396853	1.073810573795104	target	1	0	stabilized	0.07121360603840868	2.047105585396853	0.47780263872409995	9934	0	9081	1	ACTH
PSD11_HUMAN	52	-0.9664143788944948	7.029389754775396e-5	-1.3426746163265266	2.3438826109409896	2.2259309984227524	1.0715866460169237	target	2	0	stabilized	0.06914039688700657	7.074801880301161	1.477491831129206	9976	0	9122	1	ACTH
TRXR1_HUMAN	62	3.0216887037377775	0.0014555258848358483	-2.253831108531622	3.477592374042593	2.85350481137469	1.070823149547261	target	6	0	stabilized	0.06842765135758908	4.1050375249450965	3.087814693515541	9992	0	9137	1	ACTH
MPCP_HUMAN	67	3.7101347589514817	4.384169620635449	0.6602790973460558	0.640816756513031	1.74372621729855	1.0694212759226749	target	1	0	stabilized	0.06711763853065514	1.74372621729855	3.7101347589514817	10016	0	9160	1	ACTH
HAP28_HUMAN	47	3.4595617174954625	7.079072475063079	0.5081447944157	0.7812863685514186	1.6070100653843453	1.0692781396877509	target	4	0	stabilized	0.06698378499883764	1.7955809858939586	4.353251645524783	10018	0	9161	1	ACTH
SUCB2_HUMAN	42	-11.52394222086076	-8.29464634900815e-7	-0.5777412634585455	1.0129154925050516	0.4839413207473264	1.0680366733232438	target	0	1	destabilized	0.06582207826610058	0.4839413207473264	-11.52394222086076	10039	0	9181	1	ACTH
LRC40_HUMAN	57	3.3045731666044174	6.5381442852706355	0.8480866324199776	0.3510008572576484	1.530331847296155	1.0680164006575465	target	1	0	stabilized	0.0658030968410182	1.530331847296155	3.3045731666044174	10040	0	9181	1	ACTH
RANDOM15664	37	3.228475378996761	-4.161276288110898e-4	-0.8688136425996948	0.9884704681389558	0.28751091753772023	1.0662556342813037	target	0	2	destabilized	0.0641531040126544	0.28751091753772023	3.228475378996761	10070	0	9210	1	ACTH
PIPSL_HUMAN	47	4.0251366981583745	7.906868541128014	1.0996827386176302	0.1775257638620661	2.3668241018596503	1.0635402914857313	target	2	0	stabilized	0.06160324068167541	4.27777647410437	4.0251366981583745	10122	0	9261	1	ACTH
NOP2_HUMAN	57	3.9532511675146105	0.24742668905136264	1.7051152006824981	-0.3898988852982213	1.9667464097140086	1.0621482498567218	target	2	0	stabilized	0.06029350804594075	1.9667464097140086	3.2018143080475383	10143	0	9281	1	ACTH
SAFB2_HUMAN	57	3.211306458300821	3.8632764111514833e-4	-0.6643271447725816	1.6679815396788507	1.5858656338384802	1.0596825293751457	target	4	0	stabilized	0.05796936267523193	1.7297990525689375	3.097094491339127	10183	0	9320	1	ACTH
ERCC6_HUMAN	47	3.502729798798416	7.338563587197926	0.4273636018147756	0.7794070245466919	1.6114405127073799	1.0593237148365333	target	4	0	stabilized	0.05763069964106484	1.975689135621624	3.502729798798416	10189	0	9325	1	ACTH
PSME4_HUMAN	42	3.494370171442128	8.999242664291264	1.06903622456197	0.5905981315475469	2.1592894175140596	1.0589003884470687	target	4	0	stabilized	0.05723100029438639	11.308255700727956	3.494370171442128	10196	0	9331	1	ACTH
CREG1_HUMAN	42	3.5991990052826615	5.737814773927257	0.49774890479522726	0.7307788532000341	1.6905587517104752	1.057103204034814	target	2	0	stabilized	0.055532340754506984	1.6905587517104752	3.5991990052826615	10233	0	9367	1	ACTH
PERI_HUMAN	67	3.4659192036932582	-9.272499797084246	0.6532553870451221	0.5754573181592195	0.28742502127158653	1.0553818512293691	target	0	3	destabilized	0.05390264573523604	0.11727008005143942	3.348689816661156	10276	0	9409	1	ACTH
ARLY_HUMAN	52	4.229067594955456	1.001953146036484	0.6247304852145206	0.442668471391168	1.638249703141814	1.0550052251360174	target	1	0	stabilized	0.05354571965132654	1.638249703141814	4.229067594955456	10287	0	9419	1	ACTH
TYSY_HUMAN	42	3.0836002985893187	8.851306295309369e-4	-2.683646577850635	4.431243021118219	5.2311835469812085	1.0517429821431235	target	2	0	stabilized	0.05044877091393637	5.2311835469812085	3.0836002985893187	10356	0	9487	1	ACTH
DPYL5_HUMAN	52	-0.4206910262332091	9.691303904186887e-5	-0.677711081532776	1.6838873150945801	1.635662033096897	1.0504517047903974	target	2	0	stabilized	0.049220266700550006	1.7817824307450243	-0.4206910262332091	10385	0	9515	1	ACTH
RANDOM15651	57	2.610032123766785	3.2265613334866186e-4	-2.268537196482176	3.26726961460294	3.0609212281518294	1.0503734211719689	target	4	0	stabilized	0.04914574015619624	3.0609212281518294	2.2243709865585863	10387	0	9516	1	ACTH
K1C28_HUMAN	57	3.3447178355647873	7.60172726334348	1.4240795568417892	0.14985633179952146	2.2025846667916205	1.0379747728224318	target	1	0	stabilized	0.03727148080908293	2.2025846667916205	3.3447178355647873	10636	0	9764	1	ACTH
K2C79_HUMAN	37	3.335302905235209	6.601681759342327	1.0362110715843817	0.3528611393808966	1.8600584584538362	1.0353490593637564	target	6	0	stabilized	0.03473862528342455	2.6050446954292217	3.335302905235209	10693	0	9820	1	ACTH
PFD6_HUMAN	57	3.0177209227083686	0.005163168762568611	-0.6935236297391083	1.6943363292562061	1.5974799620933333	1.0334537869322042	target	1	0	stabilized	0.03290638402837695	1.5974799620933333	3.0177209227083686	10729	0	9855	1	ACTH
DIAP1_HUMAN	37	1.5227701681007904	7.041305321978103e-5	-1.1229431558717557	2.1594314596778563	2.0293458646530294	1.0315372840382353	target	1	0	stabilized	0.03105019833229816	2.0293458646530294	1.5227701681007904	10766	0	9891	1	ACTH
EXOS7_HUMAN	57	3.478825623532905	3.4023574925371087e-4	-0.6689125052168956	1.6702363453085172	1.7283343951649865	1.0302503603487787	target	2	1	stabilized	0.029801841005016504	2.197752705478866	3.963647465836663	10789	0	9913	1	ACTH
IMA7_HUMAN	47	2.0915263194731812	-2.1037617605184418e-4	-0.6284113354509092	0.9740305768406604	0.4171882152990563	1.0294785590605315	target	0	1	destabilized	0.0290524207127668	0.4171882152990563	2.0915263194731812	10800	0	9923	1	ACTH
RB11B_HUMAN	47	3.3398935570784505	6.564514965666782	0.6569342929008888	0.5734044638876727	1.535011250633726	1.0227751375696312	target	3	0	stabilized	0.027974021907904777	2.3681002348304165	3.3398935570784505	10816	0	9938	1	ACTH
NT5D1_HUMAN	57	3.333391973610017	9.388364058515475e-5	-1.072703238509229	2.073428451299609	2.0352492387822516	1.0257880928980934	target	2	1	stabilized	0.02546118828048495	2.0352492387822516	3.333391973610017	10861	0	9982	1	ACTH
ANXA1_HUMAN	42	3.4618585392583126	8.503016372519253	1.02706825233652	0.6151564600582237	2.1951281236949343	1.0223615753384674	target	3	0	stabilized	0.02211522112821858	6.25302330269782	3.218005607992316	10936	0	10056	1	ACTH
RS26_HUMAN	42	2.2932461595046196	1.7744736284991026e-4	-1.4589323794739955	2.5098718728871954	2.3890921820251174	1.0178687603536605	target	5	0	stabilized	0.017710990715054595	4.6143797659093595	3.4652504360755234	11034	0	10153	1	ACTH
CWC27_HUMAN	47	3.2771228879267853	-7.523898716891002	1.21787453180252	0.7604839843438247	0.5017426956046528	1.0140481954191642	target	0	1	destabilized	0.013950434038652584	0.5017426956046528	3.2771228879267853	11102	0	10220	1	ACTH
IREB2_HUMAN	42	0.37663828011829126	-4.582079649308593e-5	-0.8538919539291275	1.0453772203460494	0.4221062997208526	1.0130005687320633	target	0	3	destabilized	0.012916786699817495	0.29610550510820655	0.37663828011829126	11122	0	10239	1	ACTH
CHM4B_HUMAN	67	3.334107940100831	5.506343411174255e-4	-0.7584981089447018	1.7429819329116105	1.696545903327698	1.0113433727133898	target	1	0	stabilized	0.011279519084427553	1.696545903327698	3.334107940100831	11155	0	10271	1	ACTH
PTPRM_HUMAN	57	1.5454899338030346	4.255644181979478e-5	-2.346018921280036	3.336609485386217	3.330360128898291	1.003673019632172	target	3	1	stabilized	0.003666290567852728	3.330360128898291	3.3443002048047057	11337	0	10452	1	ACTH
NMDE2_HUMAN	57	4.085356064479673	8.691773168052666	0.6937033314182737	0.6948104376040609	2.012925538236754	1.0022467991692154	target	2	0	stabilized	0.0022442788902964673	2.012925538236754	4.331248949224502	11377	0	10491	1	ACTH
PSMD3_HUMAN	57	3.602524603634245	2.48877198428656e-4	-0.7353718681482535	1.7289337346526394	1.815680469603384	1.001557787519202	target	3	0	stabilized	0.0015565754268495632	4.611850125666938	2.441804796873357	11391	0	10504	1	ACTH
PRS8_HUMAN	52	-1.2330791716478213	2.1832645946110603e-5	-0.8631758488463053	1.8810350114932093	1.8210185834204098	0.9933703133263249	target	2	0	stabilized	0	6.182492233989914	-1.2330791716478213	11426	0	10538	1	ACTH
WNK2_HUMAN	37	2.6370876017052396	-4.1774772606430964e-4	-1.7921353378138971	0.9999323673861391	0.0735917095027229	534.3691178289689	target	0	7	destabilized	20.694538301148388	0.0735917095027229	2.6370876017052396	1	0	0	0	alpha
NFL_HUMAN	52	2.684014880798361	-1.1119500026976553e-4	-1.5960948711578182	1.000131795140588	0.1638070716093339	190.9806951417764	target	0	5	destabilized	16.799694980842002	0.09722773004049992	2.0518876343011425	2	0	0	0	alpha
PERI_HUMAN	52	-2.6659143325715657	-2.4062597300649586e-4	-1.8121026923609778	0.9950187153073046	0.0734201580503521	151.2009964732781	target	0	6	destabilized	16.51259447670074	0.019955692560698523	2.430246561341841	3	0	0	0	alpha
ECHD1_HUMAN	52	3.002896574852977	-2.6314574026190234e-4	-1.6046805002513531	1.012204187910826	0.13497656561940852	45.07806979534374	target	0	7	destabilized	14.950563991584199	0.09566384543691524	3.548687408111734	4	0	0	0	alpha
EP15R_HUMAN	52	-7.294883766537525	-0.022276630348616985	-1.9762614285131428	1.0008214292909465	0.23528860399552387	63.94501506349239	target	0	5	destabilized	13.846468999615961	0.13969482583887533	2.8897720120657158	5	0	0	0	alpha
USO1_HUMAN	37	2.6301194274590114	-1.179699039858191e-4	-1.715568360070292	0.9978541092803943	0.10256862249871515	253.829084857546	target	0	6	destabilized	12.994313165756095	0.041173490966226495	2.6301194274590114	6	0	0	0	alpha
PLSL_HUMAN	37	1.6970775422107076	-4.197402706855444e-5	-0.9917277428550915	0.999595479968879	0.43636778171221746	33.52397820544548	target	0	7	destabilized	11.293809756681263	0.42024856185606346	1.6970775422107076	7	0	0	0	alpha
TPD54_HUMAN	37	-4.68124239933366	-1.2907176278021155e-4	-1.5959013335328605	0.9992860560524592	0.15899604950907845	189.94796959201594	target	0	4	destabilized	11.229168650067116	0.15899604950907845	3.214060942238264	8	0	0	0	alpha
ERF3B_HUMAN	37	-7.320573909807576	-6.689513697737701e-5	-1.6068397390208657	1.002246808813668	0.1615099324780041	62.611347237765834	target	0	6	destabilized	10.53484517913468	0.15719306046662432	3.3163922830505763	9	0	0	0	alpha
RTRAF_HUMAN	37	3.6795057528634607	-2.1565354301737125e-4	-1.0443663279506885	0.9996304448406376	0.3952818459596658	28.11654280960307	target	0	4	destabilized	10.445214125352347	0.24604459471916681	3.6795057528634607	10	0	0	0	alpha
BAX_HUMAN	57	1.9013708570361878	-4.278376438999185e-4	-1.2016392615472271	1.004972481366267	0.2864267952153892	39.04164418396428	target	0	5	destabilized	10.222971922552667	0.22828304727242119	0.023385934423507376	11	0	0	0	alpha
CNKR1_HUMAN	37	2.100789386901931	-2.4420381161882853e-4	-1.9944503731480814	1.0336625238401356	0.02846346150213948	49.89458227481637	target	0	4	destabilized	8.754981190280187	0.02846346150213948	2.100789386901931	12	0	0	0	alpha
TPM3_HUMAN	42	1.20314107850829	-3.766880864578233e-4	-0.638893273522945	0.9988789763986891	0.6288279036786224	20.939477507893088	target	0	5	destabilized	8.68323638100697	0.3700033382270542	1.20314107850829	13	0	0	0	alpha
ACTN1_HUMAN	37	2.933167930094886	-8.206189358269094e-4	-0.8187810241602371	0.9592446013004363	0.4750358861217277	17.341101151141302	target	0	5	destabilized	8.4902001862761	0.42536682803230874	2.933167930094886	14	0	0	0	alpha
PTPRA_HUMAN	37	2.4320337480879317	-7.155676315041118e-4	-1.67838090326058	0.9837447110379203	0.0920302379205152	83.78563333020048	target	0	3	destabilized	8.43962973797237	0.0905595392111096	2.4320337480879317	15	0	0	0	alpha
DFFA_HUMAN	37	3.011528735228378	-6.859267672081548e-4	-1.0547478457246222	0.9873411951050539	0.372426143648333	26.705869054876345	target	0	7	destabilized	8.117539286768588	0.31943176633488657	3.011528735228378	16	0	0	0	alpha
S10AD_HUMAN	37	-58.79664511200417	-0.014574903755479525	-5.93176977884639	1.0003388375486086	0.27782026993706377	35.41428458008104	target	0	4	destabilized	8.026512701008443	0.27782026993706377	4.383598334638326	17	0	0	0	alpha
GRDN_HUMAN	62	1.5651409223297348	-3.506459781115598e-4	-1.5793531477559846	0.9774874486939293	0.1099982077981526	48.75653566434838	target	0	7	destabilized	7.982764814972684	0.09101286966449397	3.219213382899964	18	0	0	0	alpha
FL2D_HUMAN	37	0.7588140954104959	-3.0341961292788195e-5	-1.1867712290395573	1.0026933653653047	0.3754624332028026	89.52346394480887	target	0	7	destabilized	7.958916149221055	0.24505627308192846	0.7588140954104959	19	0	0	0	alpha
LKHA4_HUMAN	37	3.073242599320296	-6.164361926987868e-4	-0.9303426751321285	1.000278560125741	0.4648289117344132	19.20790289589363	target	0	5	destabilized	7.465287836172193	0.41812558295567975	3.073242599320296	20	0	0	0	alpha
GIT1_HUMAN	37	0.14464327239343772	-3.408950826429565e-4	-1.973066263194789	1.0268153265419813	0.017419128218516638	233.67489379605553	target	0	2	destabilized	7.404693865813699	0.017419128218516638	0.14464327239343772	21	0	0	0	alpha
NDRG1_HUMAN	47	2.5574205714227682	4.284896318638428e-4	-2.2896653692387745	3.292152639399191	2.269449534959996	37.94339965058693	target	4	0	stabilized	7.378122155872163	3.209503986767501	2.5574205714227682	22	0	0	0	alpha
TRFL_HUMAN	62	-25.56799039969859	-0.002185378241122234	-1.891283440057257	1.0011095653464495	0.08363295476867694	128.92140990861432	target	0	2	destabilized	7.180481430191859	0.07161452393981209	1.8901109748950045	23	0	0	0	alpha
AP3B1_HUMAN	37	2.784276152358336	-3.7550753991909253e-4	-1.4940191135705798	1.0045847770476921	0.18669143320629725	50.04403044266989	target	0	3	destabilized	6.970480000504973	0.13773936002390408	2.784276152358336	24	0	0	0	alpha
KHDR3_HUMAN	37	-1.9240176633254689	-5.162401780867883e-5	-1.3625559204125288	1.0031902122288305	0.14292188916028373	13.3452003895896	target	0	4	destabilized	6.601780435450976	0.12207377595732223	4.12838114851856	25	0	0	0	alpha
PRS10_HUMAN	37	2.372791330782105	-3.66376957109811e-4	-1.0232222797321364	0.9930486902829874	0.36114287936020967	13.505928662037492	target	0	5	destabilized	6.293864794620809	0.2194579929151796	2.372791330782105	26	0	0	0	alpha
MIME_HUMAN	37	1.926807043310801	-3.3976849467470534e-4	-1.5055908313496957	1.002674579126453	0.14455415237618982	53.83438519361155	target	0	3	destabilized	6.248594006508379	0.14455415237618982	1.926807043310801	27	0	0	0	alpha
CTRO_HUMAN	52	0.7878332800954905	-4.1736122088100337e-4	-1.6431005715025206	1.0011924642694943	0.13416463085138672	366.649395403431	target	0	3	destabilized	5.904406065563762	0.05657958266281209	0.7878332800954905	28	0	0	0	alpha
AL7A1_HUMAN	42	-1.2482475185024036	-0.0349072771114846	-0.881542281024826	1.0003927245442623	0.6042773736982052	19.04294511151477	target	0	5	destabilized	5.8270990998895105	0.37317710718255487	3.232070761607838	29	0	0	0	alpha
FBX22_HUMAN	42	-0.6547543403471549	-1.4690182389722508e-4	-0.7823774048972723	1.0018250697484552	0.5536207820130381	11.991882992411036	target	0	3	destabilized	5.818157635192497	0.3083795459432804	3.7351738831610497	30	0	0	0	alpha
SPC25_HUMAN	37	-172.03476681044157	-1.5958981842284094e-4	-1.6563148801747614	1.0014497577571297	0.13826125071603568	58.807332992985316	target	1	3	destabilized	5.60131403807126	0.12814392624718074	2.943128244906195	31	0	0	0	alpha
SYDC_HUMAN	67	3.2968906812700687	-6.255658020783625e-4	-0.8773432786181198	0.9089318212985488	0.3814008598288196	7.179463115733597	target	1	5	destabilized	5.501199969538863	0.3319163733727507	2.992710232583638	32	0	0	0	alpha
MK06_HUMAN	47	3.0169197211081373	-2.165041907985467e-4	-1.777845821142528	0.991139718863427	0.08658353207550562	33.89426933316344	target	0	2	destabilized	5.4746524241596966	0.009761029761188096	3.0169197211081373	33	0	0	0	alpha
BLVRB_HUMAN	42	3.502282901993118	-5.386446195384727e-4	-1.0409099546414966	1.0005415045157744	0.32746144981726377	10.649131340561874	target	0	3	destabilized	5.409010850064996	0.32746144981726377	3.502282901993118	34	0	0	0	alpha
RAB3D_HUMAN	37	-6.031196116780822	-0.008663662398982242	-1.7305227620151717	1.0000020757104398	0.1773359036762762	179.33520328264603	target	0	5	destabilized	5.286954243807097	0.1773359036762762	3.9898197344548514	35	0	0	0	alpha
NDUF2_HUMAN	52	0.9708254396962293	-3.835220732947119e-4	-1.3931946990716981	0.9973876662851086	0.20660064818809157	41.44160171263074	target	0	2	destabilized	5.236004566450167	0.13875212403578763	0.9708254396962293	36	0	0	0	alpha
SRC8_HUMAN	57	1.282920828980035	1.7254590998251276e-4	-1.273061722975491	2.2748358765363403	1.7506479304507157	18.69462713002831	target	4	0	stabilized	5.136771090811781	3.3778700686241745	4.379956217230189	37	0	0	0	alpha
AN32A_HUMAN	37	2.002257015554977	-5.803768476642099e-4	-0.7679677123693754	0.9760094006780524	0.5394750410269584	13.704859743402212	target	0	5	destabilized	5.09547189197095	0.423149791542562	2.002257015554977	38	0	0	0	alpha
PABP2_HUMAN	57	1.908409440489627	-0.017387919025349623	-1.2292478224671393	1.0029587298748204	0.26856257510786424	7.453243175321235	target	0	4	destabilized	5.042705351390043	0.22850918021458916	3.0048514166386244	39	0	0	0	alpha
KI13B_HUMAN	37	-5.041098590126315	-9.384471415445967e-5	-1.1332358300384011	1.003135834744769	0.39285978016608036	22.911487468297455	target	0	5	destabilized	5.023733851036638	0.18943577614269025	1.9059252381946454	40	0	0	0	alpha
PFKAP_HUMAN	47	3.9647717109223937	-4.749291936263813e-4	-1.0715944057059459	1.0228813270972128	0.3648077163831595	8.80060632714439	target	0	7	destabilized	5.001296935823776	0.3435837932004532	2.5579866270148437	41	0	0	0	alpha
SDSL_HUMAN	37	1.0025879111155935	-5.258187621051635e-5	-1.3911569509701651	1.0173051413534144	0.27134176057234033	7.527436937646577	target	0	4	destabilized	4.980252162569115	0.27134176057234033	1.0025879111155935	42	0	0	0	alpha
MYH11_HUMAN	37	1.6894102172497982	-4.0579922970644547e-4	-0.9806223717670803	1.0004338859802957	0.43479447455671283	17.916884286719874	target	1	4	destabilized	4.92497759393909	0.3983067036057976	1.6894102172497982	43	0	0	0	alpha
OTOF_HUMAN	62	2.561488703563216	-4.488021910958561e-4	-1.1686503011163678	1.0105096396447744	0.30505494446324277	7.837532121837643	target	0	3	destabilized	4.848390355165666	0.14358827360686066	2.561488703563216	44	0	0	0	alpha
SPB8_HUMAN	42	2.3071710662713856	-8.071240792916928e-4	-1.255322745382484	0.9943013222578085	0.24808860604258648	16.217416606732183	target	0	2	destabilized	4.758762297287843	0.24808860604258648	2.381562427102952	45	0	0	0	alpha
RANDOM14771	37	1.8532850336384632	-5.365379901281507e-4	-1.5845092943613297	0.9523430786464298	0.1084540612113252	18.690254561168654	target	0	2	destabilized	4.655406032705735	0.1084540612113252	1.8532850336384632	46	0	0	0	alpha
MYH13_HUMAN	47	2.3623023181447222	-5.43598149262362e-4	-1.168443401579358	1.0002461420062694	0.3570613821388006	23.461786119288234	target	0	3	destabilized	4.636778965625117	0.16244223114937972	2.3623023181447222	47	0	0	0	alpha
MCES_HUMAN	37	1.1263480976600935	-1.1048760588045881e-4	-0.7094719734142343	1.004056959056271	0.6090018734938335	9.09252925367613	target	0	3	destabilized	4.5401460715510344	0.3259955822694717	1.1263480976600935	48	0	0	0	alpha
AGFG1_HUMAN	47	3.107559192933241	5.905562863107116e-4	-2.566311002136135	3.564895386160565	2.7056449649438448	7.323747756201783	target	4	0	stabilized	4.508947077565462	2.8982302844473864	3.107559192933241	49	0	0	0	alpha
PP2BC_HUMAN	42	1.8087161296869507	-0.021188023864898344	-1.2549603820279784	1.0000591992868495	0.2459161263906147	8.879885495305164	target	0	3	destabilized	4.492667891049391	0.2459161263906147	1.8087161296869507	50	0	0	0	alpha
K1C19_HUMAN	57	-0.4135675206882152	-2.1214906105456016e-4	-1.1841829933296841	1.0010985707775804	0.24984509477393915	5.861552344848993	target	0	3	destabilized	4.460318157727189	0.17818930401814292	1.1408738878844573	51	0	0	0	alpha
RD23A_HUMAN	37	3.378102426129894	-5.097749062525456e-5	-1.381370946530588	0.97195889186928075	0.22779167264904956	47.866141881241845	target	0	4	destabilized	4.337302165164055	0.22779167264904956	3.378102426129894	52	0	0	0	alpha
CUL3_HUMAN	52	2.2668246736459614	-2.1003581441832774e-4	-0.6677144327349974	1.0042196421711158	0.6201464893480546	10.49597069015559	target	0	5	destabilized	4.283540183445029	0.1017615638561463	4.302047584236134	53	0	0	0	alpha
SF01_HUMAN	62	2.0923702423825254	4.2361422853094005e-4	-1.2387289119777334	2.242730520490708	1.761162699007799	7.985687296282997	target	4	0	stabilized	4.281374958528901	2.129440670929037	2.8577844888631168	54	0	0	0	alpha
CATZ_HUMAN	67	-19.00265351358111	-4.1915886646733e-6	-1.1986717455346034	1.0038968666443193	0.28322657124735406	13.567828585899663	target	0	2	destabilized	4.277959419559874	0.28322657124735406	-19.00265351358111	55	0	0	0	alpha
TRPV5_HUMAN	67	2.515893816390141	-3.601127308254774e-4	-1.5205259411825263	0.9715551291133908	0.12676031584871403	28.8444444368073	target	0	2	destabilized	4.250828973333437	0.12676031584871403	2.4947881662476785	56	0	0	0	alpha
MRGBP_HUMAN	37	-18.178019620677937	-5.038552237952477e-5	-1.584892511932439	1.000495360883023	0.14754446448013575	66.24961326357379	target	1	2	destabilized	4.193429627318332	0.14754446448013575	3.338237055927236	57	0	0	0	alpha
NUD4B_HUMAN	37	2.250367689424758	-5.179901135023964e-4	-1.4221057991861197	1.00716207610711	0.217037015312925	27.489432526675703	target	0	2	destabilized	4.158814549374692	0.217037015312925	2.250367689424758	58	0	0	0	alpha
BUB3_HUMAN	57	-108.48426993838287	0.010033207371851397	-9.933296607396493	10.938685236395562	1.8611323369451438	9.520582604639955	target	4	0	stabilized	4.116294712711384	2.181324287964917	1.3970972722137671	59	0	0	0	alpha
6PGL_HUMAN	37	0.7539392334105106	-0.009466487098446445	-0.9505126961741639	1.000781001496081	0.4494877548271986	17.200596536530472	target	0	3	destabilized	4.115467704232942	0.41058730895747597	0.7539392334105106	60	0	0	0	alpha
CAND1_HUMAN	37	1.4107838496078757	-3.473128509202591e-4	-0.7148231109399668	1.0004610675904588	0.6111521004787308	33.42379737588695	target	0	2	destabilized	4.086898689357582	0.561689111431798	1.4107838496078757	61	0	0	0	alpha
TFG_HUMAN	37	3.793740841609324	-8.425639663359149e-4	-1.5458979317669839	1.0217535077315278	0.1569841139100701	12.546257205229749	target	0	7	destabilized	4.0577332383219655	0.13656857535726807	3.793740841609324	62	0	0	0	alpha
KLC1_HUMAN	37	1.658418979359315	3.347695219682869e-4	-2.207985088529184	3.210226315875263	2.3051217502234422	31.774191079163156	target	4	0	stabilized	4.055861071340023	2.3216112224189347	1.658418979359315	63	0	0	0	alpha
OGA_HUMAN	52	2.18810646442536	-5.263455509502013e-4	-1.257046831762554	1.0988167560992244	0.33753209424498437	5.711135585540022	target	0	4	destabilized	3.902315316536646	0.33753209424498437	2.265946619704625	64	0	0	0	alpha
LACB2_HUMAN	37	3.5858695979233444	-5.212664540268725e-4	-0.866781937041665	0.9987098576964138	0.46326049009928427	10.052664624032388	target	0	5	destabilized	3.896982607158379	0.34979456683459326	3.5858695979233444	65	0	0	0	alpha
HSP7C_HUMAN	37	2.658886919109061	6.322772833960439e-5	-2.4640513313621177	3.3992021140706985	2.5052882271835717	9.067689516246713	target	4	0	stabilized	3.8853191338418016	2.540618272769159	2.658886919109061	66	0	0	0	alpha
CHM4A_HUMAN	37	3.763471281266923	-8.433347686330376e-4	-1.1808463552562605	1.012170348498294	0.3651306906491301	31.2926204862839	target	0	3	destabilized	3.8593605722186477	0.3651306906491301	3.763471281266923	67	0	0	0	alpha
KCD15_HUMAN	37	2.077704432596651	-5.142493966320463e-4	-1.369883342488825	1.0003277973927753	0.23632404668064383	45.84392706098222	target	0	3	destabilized	3.8252427376067106	0.23632404668064383	2.077704432596651	68	0	0	0	alpha
FAAA_HUMAN	67	0.7742215831008755	-2.5183996870744896e-4	-0.7642208850687644	0.9813757962120344	0.49144975288481857	7.5764671349849335	target	1	3	destabilized	3.8198454790519474	0.21644099430250452	4.099527207797789	69	0	0	0	alpha
COF1_HUMAN	47	2.6169437782766836	-5.599737103826705e-4	-0.7469912817943012	1.0004317000970442	0.5125330164273385	4.656229008422744	target	0	5	destabilized	3.8058851383157544	0.31565152119293044	4.077360086644186	70	0	0	0	alpha
DCAF7_HUMAN	57	2.1861165998869097	3.384039951074037e-4	-2.0124149226240764	3.014391742986611	2.3713641558671927	7.128047756797184	target	4	0	stabilized	3.763034979872398	2.3713641558671927	3.542381404986066	71	0	0	0	alpha
GMFB_HUMAN	37	2.3714450872406694	-2.282517708745273e-4	-1.0637443832862987	0.999971351715756	0.4262436413029826	43.0594775398838	target	0	3	destabilized	3.7625823585575406	0.4262436413029826	2.3714450872406694	72	0	0	0	alpha
S10AB_HUMAN	37	-29.415923945613912	-7.643407176752977e-6	-0.7840550847734317	1.0005041552671385	0.5125261723116812	12.531776874671518	target	0	2	destabilized	3.736273804355168	0.5125261723116812	2.94908235211728	73	0	0	0	alpha
NT5C_HUMAN	37	1.118814112825201	-2.2804502832560734e-4	-0.9084676099168392	1.0054371838010796	0.4842166620801006	8.269823159971178	target	0	3	destabilized	3.6723729623975663	0.4842166620801006	1.118814112825201	75	0	1	0.02666666666666667	alpha
TBC8B_HUMAN	62	1.5168479069083916	-2.700128184175001e-4	-1.2697808295503519	0.9983996577474352	0.2744851191803433	7.929391561280877	target	0	6	destabilized	3.671601430274516	0.1338093831069409	3.6658743966895617	76	0	1	0.02631578947368421	alpha
TCRG1_HUMAN	67	2.0004995413850013	-6.236552961075907e-5	-0.9111332276705112	1.0030178266659953	0.49675483026177303	13.615431618361058	target	0	3	destabilized	3.6435205578108647	0.4438435843990123	3.8824230190134155	77	0	1	0.025974025974025976	alpha
PCYOX_HUMAN	52	-3.583445474754605	-6.6566253876597936e-6	-1.3763810920623423	1.0061660581302858	0.21410117351200728	21.49455982363622	target	0	3	destabilized	3.6234886386935354	0.18639336236079604	2.3607764818123087	78	0	1	0.02564102564102564	alpha
C144C_HUMAN	52	2.5272205454793726	-9.972459568854466e-4	-1.5200622645658695	0.9999327690574282	0.09676346182997013	5.523251661138966	target	0	4	destabilized	3.5934566565743142	0.06085627884172318	3.3518620909944556	80	0	2	0.05	alpha
AN32E_HUMAN	62	-26.060811512579495	-2.515078845198837e-5	-1.1195758185994173	1.0030140691955065	0.29858301799148596	8.650314478491195	target	0	5	destabilized	3.5646096346898695	0.21503112122755108	3.291858422905259	81	0	2	0.04938271604938271	alpha
PCBP2_HUMAN	37	2.850967895358929	8.712889898408605e-5	-2.98478792376247	4.283480291282459	3.183306940178189	11.372589845900853	target	4	0	stabilized	3.549356257617126	3.183306940178189	2.850967895358929	82	0	2	0.04878048780487805	alpha
SH3L1_HUMAN	52	1.945849542249492	-4.878163535835789e-5	-1.0403242081831428	0.9035235176551244	0.3060286434205977	7.939203350017855	target	0	2	destabilized	3.5095531387192436	0.3060286434205977	1.945849542249492	83	0	2	0.04819277108433735	alpha
VPS35_HUMAN	37	2.5961027462775896	7.398923446922995e-4	-5.260877263730314	6.258499331811328	4.302727868333106	12.772356277897975	target	3	2	stabilized	3.4924300274355153	4.302727868333106	2.5961027462775896	84	0	2	0.047619047619047616	alpha
PFKAM_HUMAN	67	2.9528834143553335	-8.254837996078293e-4	-1.3200799475210552	1.000115036831026	0.09865572011413531	5.728738376902714	target	1	5	destabilized	3.4867212703447183	0.09865572011413531	2.046439839961636	85	0	2	0.047058823529411764	alpha
NNRE_HUMAN	67	2.3457228645876347	-3.479205435715585e-4	-1.3247410815783798	1.0036181439137475	0.20053236930435553	8.467381024905878	target	0	4	destabilized	3.484046203789706	0.20053236930435553	2.8948514806909773	86	0	2	0.046511627906976744	alpha
CLCA_HUMAN	37	-2.80011639345483	-1.0464420411967054e-4	-1.0242044299137778	0.9969061424630757	0.3846143153735745	15.805792865262452	target	0	3	destabilized	3.4629343176472642	0.3846143153735745	3.145563626666078	87	0	2	0.04597701149425287	alpha
WIPF2_HUMAN	37	-2.381169426457924	-3.807337421879059e-5	-0.8471582695617588	1.0072354402838433	0.46138298636667885	3.9801611796848477	target	3	4	destabilized	3.442779562595673	0.28292124451873696	2.9220440301710573	89	0	3	0.06741573033707865	alpha
RSF1_HUMAN	67	2.0285975798132534	-2.7919457409576883e-4	-1.2813120462072285	0.9983120404896781	0.21447615641370954	19.824817030961356	target	0	3	destabilized	3.408088938156502	0.18225364458388105	3.363337243858498	90	0	3	0.06666666666666667	alpha
SARNP_HUMAN	62	3.6235461342230986	8.983699509496218e-4	-2.389106220550837	3.484973077968462	2.660603372722366	5.492649799436338	target	7	0	stabilized	3.358014075220824	4.711494975731311	3.682146673478736	92	0	4	0.08695652173913043	alpha
POTEJ_HUMAN	52	1.5838155291715594	-3.275728159316816e-4	-1.4062920378887493	1.0088080188470658	0.20323942605106632	11.474611447231323	target	0	3	destabilized	3.3243483310746473	0.20323942605106632	2.9256743010404325	93	0	4	0.08602150537634409	alpha
KAD2_HUMAN	37	2.546059131245278	5.538419154113428e-4	-2.5122073209108198	3.526757446493181	2.610221857450489	10.770181758523469	target	4	0	stabilized	3.311766543130241	2.610221857450489	2.546059131245278	94	0	4	0.0851063829787234	alpha
LUC7L_HUMAN	52	2.5850048512049155	-3.9132874340495086e-4	-1.4517437938898765	1.010156525388312	0.2537630955773734	27.301906827882824	target	0	1	destabilized	3.3069565469269087	0.2537630955773734	2.5850048512049155	95	0	4	0.08421052631578947	alpha
NUDT3_HUMAN	62	1.7446041616368981	-4.070056569351697e-4	-1.696628270254882	1.0029312911410841	0.06897743391837353	27.074471068351425	target	0	4	destabilized	3.298591256901267	0.06897743391837353	4.0841530969654976	96	0	4	0.08333333333333333	alpha
CLUA1_HUMAN	37	2.1568098233314803	3.531135050512392e-4	-3.635997709146869	4.636255490773304	3.2700782444188534	6.467357451014629	target	4	0	stabilized	3.2967177773307874	3.2700782444188534	2.1568098233314803	97	0	4	0.08247422680412371	alpha
THIO_HUMAN	37	2.7834440963195655	-1.9309454935974193e-4	-1.2201471606374807	1.0359054397243754	0.3788414683333023	26.79991388155789	target	0	4	destabilized	3.2883986741369426	0.1890628565324757	2.7834440963195655	98	0	4	0.08163265306122448	alpha
KPYR_HUMAN	37	0.616557716582664	-5.309317161957943e-4	-1.262401970822851	1.0012105349682752	0.3145511377317605	26.179070689399246	target	0	1	destabilized	3.2649602628845424	0.3145511377317605	0.616557716582664	99	0	4	0.08080808080808081	alpha
ESYT1_HUMAN	37	-37.89746778132397	-2.0861390101380153e-5	-1.4491866715795063	1.0056305192590616	0.22728957965127633	26.169462374486784	target	0	3	destabilized	3.2645931727500916	0.22728957965127633	3.206341385393781	100	0	4	0.08	alpha
TTC1_HUMAN	52	2.608361538886337	6.221121204130199e-4	-2.1445866246625718	3.171768954123661	2.5643228045546436	3.926975393274756	target	4	0	stabilized	3.2597704147257747	4.005576610034895	2.608361538886337	101	0	4	0.07920792079207921	alpha
F169A_HUMAN	47	2.016573867356883	-3.662988717011682e-4	-0.7901766665826884	1.0126425784632527	0.5094465757845047	9.627174192865542	target	0	2	destabilized	3.2509246411681048	0.3656845874556445	3.1756521451240687	102	0	4	0.0784313725490196	alpha
K2C1B_HUMAN	57	2.2932397901584256	-1.2434990117718938e-4	-1.4982345878501127	1.045803468072681	0.21363987078793678	8.8210233085899	target	0	5	destabilized	3.249947827126297	0.21363987078793678	2.7640968631443816	103	0	4	0.07766990291262135	alpha
ALBU_HUMAN	47	3.7453857099194874	-2.808910756279509e-4	-1.1204047617663113	1.0082335045071666	0.31848025285536763	5.8383358665899125	target	0	6	destabilized	3.240033611287439	0.16791846776913535	2.54029274456573	104	0	4	0.07692307692307693	alpha
EFHD2_HUMAN	52	1.7352685454076053	4.5588482353185977e-4	-0.9325973464750548	1.936310802399643	1.6096001678572716	3.4911597206045717	target	5	0	stabilized	3.2013231242077658	4.8853016106688445	3.0227045062201237	105	0	4	0.0761904761904762	alpha
RAB2B_HUMAN	42	3.40874645711989	-8.501864980295806e-4	-1.3812654042428965	1.0149039396772224	0.1797504432581835	5.124638946977203	target	0	2	destabilized	3.199302015067488	0.08752095098517787	3.40874645711989	106	0	4	0.07547169811320754	alpha
FKBP9_HUMAN	57	0.6777295466528284	-8.198725975579698e-5	-1.2463909203065122	1.0029860427033108	0.2855990428199736	24.411798218776678	target	0	2	destabilized	3.195066548990898	0.2855990428199736	2.845096255610364	107	0	4	0.07476635514018691	alpha
ZO2_HUMAN	57	0.9018889461101021	-0.03719356790498132	-1.4463769119757317	1.0029571116958718	0.2469922092109997	8.977014212896867	target	0	2	destabilized	3.1835304245464293	0.2469922092109997	3.7334721344955923	108	0	4	0.07407407407407407	alpha
ACTN2_HUMAN	52	-4.877461532732151	6.0390613103995656e-5	-3.1477278852022375	4.153214711102544	3.1738506492162704	6.4622395316845695	target	2	0	stabilized	3.1705561668370663	3.860742725518012	-4.877461532732151	109	0	4	0.07339449541284404	alpha
PRCC_HUMAN	37	-120.20951747874513	0.009044633922721852	-11.354253542289278	12.357485226309775	2.075701441832866	7.4552422078451315	target	5	0	stabilized	3.14293961784674	2.075701441832866	1.815461337414514	110	0	4	0.07272727272727272	alpha
YBOX1_HUMAN	52	-25.755194853691624	2.4300718661352045e-5	-2.6371539565043483	3.664330304322873	2.8131239227364215	6.42580421950667	target	5	0	stabilized	3.080890610760469	3.4573971815242874	2.833739849792058	112	0	5	0.08928571428571429	alpha
MK03_HUMAN	52	2.2313022866336674	-4.3919859654232906e-4	-1.137222860365646	1.0221839418946084	0.2878611343666555	3.4065843486518883	target	0	3	destabilized	3.0259379876340016	0.26487912403253194	2.9699544643397195	114	0	6	0.10526315789473684	alpha
FUCO2_HUMAN	57	3.211726407798232	-7.107371231302804e-4	-0.8626256771357926	0.9993785107778153	0.41124772621488614	7.12206837580482	target	2	3	destabilized	3.0246925516067598	0.28489248511317483	3.507010311219342	115	0	6	0.10434782608695652	alpha
NHLC2_HUMAN	47	1.7302980373612866	-1.9787872189239863e-4	-0.5624940613280647	0.9816110304644363	0.646132538482455	19.76043572197098	target	0	2	destabilized	2.983681742783642	0.511088341208381	1.7302980373612866	118	0	8	0.13559322033898305	alpha
GNPI1_HUMAN	37	2.0758810585251837	-1.8464523374585136e-4	-1.1495416156087297	0.983264440703527	0.31123346787422634	11.536552149448559	target	0	5	destabilized	2.964444202329878	0.31123346787422634	2.0758810585251837	120	0	9	0.15	alpha
PSA6_HUMAN	37	1.8586245372773158	-4.024246497961034e-4	-0.6825282043223664	1.002805151363973	0.6094525123761846	19.27986763955069	target	0	1	destabilized	2.9590614239903017	0.6094525123761846	1.8586245372773158	121	0	9	0.1487603305785124	alpha
DENR_HUMAN	37	1.9400848770269645	-7.209824224780696e-4	-1.1180670668027897	1.003570037391282	0.36836155527290976	19.100382352024315	target	0	3	destabilized	2.9497083532828103	0.36836155527290976	1.9400848770269645	122	0	9	0.14754098360655737	alpha
UBQL1_HUMAN	37	-3.374643386382558	-7.935394013366263e-5	-1.060145770863495	1.004287277909511	0.40274222369486296	14.267301445909284	target	0	3	destabilized	2.9325269140343466	0.16086192658615303	3.2557228649504895	123	0	9	0.14634146341463414	alpha
NUP62_HUMAN	47	4.190516177141674	-7.606288773138388e-4	-1.2400887961864353	0.911975910383104	0.16607904089817044	6.52507667214497	target	1	3	destabilized	2.905514206431092	0.11666675335140052	4.190516177141674	124	0	9	0.14516129032258066	alpha
UN45A_HUMAN	37	0.2838901673751093	-1.4270705416575814e-4	-0.6523788920135802	1.0011542638004964	0.6397700713272088	18.173334651678097	target	0	2	destabilized	2.8999553907030347	0.6069768933184521	0.2838901673751093	125	0	9	0.144	alpha
NUDT5_HUMAN	37	2.5316561853514195	-5.341096076816602e-4	-0.882147842972131	1.0020651555314777	0.4838001185095995	18.058210758302607	target	0	3	destabilized	2.8936004710046093	0.4838001185095995	2.5316561853514195	126	0	9	0.14285714285714285	alpha
VAT1_HUMAN	67	2.0863375522418446	-5.530252044705092e-5	-0.7863117012416662	1.002866165342244	0.46920888789914095	4.9310232352559416	target	0	3	destabilized	2.8903706662217847	0.46920888789914095	3.1109621294636574	128	0	10	0.15625	alpha
IMPA1_HUMAN	37	2.971137479086139	-4.1312942542307484e-4	-0.9532319845316359	1.009015840574445	0.45228377758388844	17.853953457160344	target	0	3	destabilized	2.882224965895945	0.45228377758388844	2.971137479086139	129	0	10	0.15503875968992248	alpha
PRPS2_HUMAN	62	2.484592489389191	-3.0610851522216737e-4	-1.5566211916894406	1.0032741114670867	0.10908482691119882	9.855997130639079	target	0	4	destabilized	2.8545278006605876	0.10908482691119882	4.149737944048558	130	0	10	0.15384615384615385	alpha
PLSI_HUMAN	37	-12.473954048082547	-5.075687539588992e-5	-0.9215989921133562	1.0014127373574715	0.4622750307941448	16.72624748574316	target	1	3	destabilized	2.8169791913190267	0.4038802456733049	3.0145584217053547	131	0	10	0.15267175572519084	alpha
PTER_HUMAN	37	2.861226021545559	-4.6780038735968684e-6	-1.2126343143990472	1.001314086983919	0.16238761398288476	4.461743941264275	target	0	4	destabilized	2.8058757613623335	0.16238761398288476	2.861226021545559	133	0	11	0.16541353383458646	alpha
AL9A1_HUMAN	42	2.7853560716304484	-3.7547874927213224e-4	-0.888726524869084	1.0015472847878903	0.5016632531476344	16.173746687978163	target	0	2	destabilized	2.7833893528703966	0.38245462550303044	2.7853560716304484	136	0	13	0.19117647058823528	alpha
MAP4_HUMAN	37	1.9760472816965535	-1.2642280599708264e-4	-0.8748628828129904	0.9444534987236862	0.45549650506874084	16.156777424646034	target	0	1	destabilized	2.7823396164150713	0.45549650506874084	1.9760472816965535	137	0	13	0.1897810218978102	alpha
1433S_HUMAN	37	2.8395044386595987	-4.072511305631914e-4	-1.0653261572716537	0.9417827790569441	0.31699625867912073	16.150632075405962	target	0	7	destabilized	2.781959186698837	0.31699625867912073	2.8395044386595987	138	0	13	0.18840579710144928	alpha
RS21_HUMAN	47	-2.3533057198611753	-2.0498337794033917e-5	-1.053913892598542	1.0028164932630073	0.34307203061089875	9.119745009268401	target	1	4	destabilized	2.7811685929942724	0.07686952791146122	2.9669578501323817	139	0	13	0.18705035971223022	alpha
LITD1_HUMAN	47	0.8522396130232489	-3.105898304085173e-4	-1.0275390989820277	1.0139912103230155	0.43598858765166726	5.512652661561563	target	0	4	destabilized	2.780591119709819	0.23956276819763914	0.8522396130232489	140	0	13	0.18571428571428572	alpha
NSF_HUMAN	37	4.412380794048635	6.497435416246906e-4	-2.5422059454245503	3.5465742978535895	2.4540266983432724	15.978443173789575	target	2	0	stabilized	2.771240512174736	2.4540266983432724	4.412380794048635	142	0	14	0.19718309859154928	alpha
FSCN1_HUMAN	37	-0.35992886925499645	1.9487059788465277e-4	-2.677930155516013	3.674137821138647	2.8505635151271056	4.324504847251136	target	6	0	stabilized	2.770189988869099	3.15027058831364	3.1764224762679567	143	0	14	0.1958041958041958	alpha
FUBP1_HUMAN	37	-0.07501118720112875	-2.7886944204377805e-4	-0.8710910116299531	1.0001392728485246	0.4914397814145135	15.944061012168577	target	0	1	destabilized	2.7690864095569965	0.4914397814145135	-0.07501118720112875	144	0	14	0.19444444444444445	alpha
PP1A_HUMAN	37	3.054028488974648	5.933726321788597e-4	-1.8950627717186308	2.8954841185269236	2.1939504728576846	13.890179417918985	target	3	0	stabilized	2.7589196567623904	3.1009961386594935	3.054028488974648	145	0	14	0.19310344827586207	alpha
CDK16_HUMAN	37	2.1146090887217945	-1.8696855447808934e-4	-2.08390420835107	1.1648175727138035	0.09590348104402358	15.036049911701491	target	0	3	destabilized	2.710450645176436	0.09590348104402358	2.1146090887217945	147	0	15	0.20408163265306123	alpha
MP2K2_HUMAN	37	2.6332832298661026	-6.277216899465203e-4	-0.9858524052873994	1.0001040981947862	0.4441352957407026	14.882230937372873	target	0	4	destabilized	2.7001679467536652	0.26509009306255465	2.6332832298661026	148	0	15	0.20270270270270271	alpha
DHX57_HUMAN	37	0.005882524460936034	-0.056894863279602644	-1.339490945876301	1.0001231871182166	0.37477222970676544	14.871994647561337	target	1	2	destabilized	2.699479890518684	0.37477222970676544	0.005882524460936034	149	0	15	0.20134228187919462	alpha
CUL1_HUMAN	67	-0.36685288729202814	-5.2574227245725965e-6	-0.9467263046004185	1.0004027560440274	0.40943103117137775	8.703825836140359	target	0	3	destabilized	2.699323250999407	0.40943103117137775	3.2695116670264244	150	0	15	0.2	alpha
TIF1B_HUMAN	37	2.7897850353972684	3.319689024023396e-4	-1.9553499492964124	2.955980325510693	2.265216433579359	8.177978341004188	target	4	0	stabilized	2.6988639770601406	2.265216433579359	2.7897850353972684	151	0	15	0.1986754966887417	alpha
YKT6_HUMAN	37	1.0358270828761182	1.9342759565646903e-4	-2.168064872151535	3.175287971645271	2.3902485392290673	7.445543910165615	target	3	0	stabilized	2.691718246886192	2.3902485392290673	1.0358270828761182	152	0	15	0.19736842105263158	alpha
PSB3_HUMAN	37	0.8097574641607587	-0.02307755580471926	-0.6259299858674305	1.0006907964059024	0.6547251662180843	14.751470286078094	target	0	4	destabilized	2.691342758230141	0.373986126083815	0.8097574641607587	153	0	15	0.19607843137254902	alpha
ACADM_HUMAN	67	1.52043216083113	-6.4644054387854e-4	-1.475608202539866	1.0565949494299642	0.21935870548190858	8.632447895422835	target	0	2	destabilized	2.671937057570384	0.21935870548190858	1.6228443916420754	155	0	16	0.2064516129032258	alpha
WNK3_HUMAN	37	1.5526553625403088	-4.225220463274529e-4	-1.426011291647123	1.0025508398344278	0.16946987321259038	13.966783195695168	target	0	2	destabilized	2.6366818815923723	0.16946987321259038	1.5526553625403088	158	0	18	0.22784810126582278	alpha
RO60_HUMAN	62	4.052699145902382	-7.700447642338241e-4	-0.9621341642140139	0.9808780795309352	0.33205580649996436	3.498337571142298	target	0	6	destabilized	2.6209016102167464	0.33205580649996436	2.429809808843345	159	0	18	0.22641509433962265	alpha
GNS_HUMAN	67	2.4896481734057057	-5.789064016586314e-4	-0.9814239958150004	0.9982165251768346	0.41333788013260125	13.11863270744201	target	0	1	destabilized	2.57403356371345	0.41333788013260125	2.4896481734057057	162	0	20	0.24691358024691357	alpha
NSUN2_HUMAN	37	2.4243022517268846	2.2088808437172936e-4	-2.6934237933820717	3.713820659267124	2.6125323984670015	13.102096355243042	target	1	0	stabilized	2.572772244521922	2.6125323984670015	2.4243022517268846	165	0	22	0.26666666666666666	alpha
KCD16_HUMAN	37	2.2007969025651084	9.182506912114132e-4	-4.014058410267472	4.978649218502932	3.2100905837298526	13.039388130480765	target	3	0	stabilized	2.567974632888468	3.2100905837298526	2.2007969025651084	166	0	22	0.26506024096385544	alpha
PROF1_HUMAN	37	-0.18684251769441232	6.554869322189515e-5	-0.9626902540023063	1.9647451855051423	1.6015133149310532	12.807240419264375	target	2	0	stabilized	2.550010668756558	1.9549698072397774	3.2143100648953844	167	0	22	0.2634730538922156	alpha
DNJC9_HUMAN	57	2.768182871643062	-8.554908554054523e-4	-1.159627605081965	1.0039762534013936	0.24752269522750697	4.038407008375458	target	0	3	destabilized	2.5269464660788152	0.18996607674887803	3.135181962242524	171	0	25	0.29239766081871343	alpha
PSA5_HUMAN	37	2.7509508039125947	-8.029596237054763e-4	-0.7397635637715789	1.0012382493941518	0.4964296725581031	6.764552449365992	target	0	2	destabilized	2.5240485932907397	0.4964296725581031	2.7509508039125947	173	0	26	0.30057803468208094	alpha
SAHH3_HUMAN	42	-1.6172914135321104	1.306399191424052e-4	-3.8547154848955407	5.1365564598428595	4.044817422115786	4.370612004773962	target	4	0	stabilized	2.521574140541566	8.350124718549642	3.1881868288641533	174	0	26	0.2988505747126437	alpha
PGM2_HUMAN	37	2.8386692385552292	-2.707595144947076e-4	-0.759635258479187	0.9864981517636601	0.46551352838245996	5.504160721494162	target	0	7	destabilized	2.5138228885109872	0.46551352838245996	2.8386692385552292	175	0	26	0.29714285714285715	alpha
QOR_HUMAN	57	1.4282867142632316	-3.760919725029853e-4	-1.1872518844492936	0.9030993221966848	0.24565819102244524	12.126906036796415	target	0	1	destabilized	2.4954266233801374	0.24565819102244524	1.4282867142632316	180	0	30	0.3333333333333333	alpha
PYRG2_HUMAN	47	3.2073265397607353	-6.172715535455427e-4	-1.024220943564911	1.0071236715826013	0.3590887621029944	3.6242993763509483	target	0	5	destabilized	2.493098489680323	0.2875771565404927	3.806168013374296	181	0	30	0.3314917127071823	alpha
PUR6_HUMAN	37	3.209110582925943	-0.0010082807402133718	-0.715117083657824	1.0040308032492413	0.5512113856211859	7.05156898010132	target	0	3	destabilized	2.481034126959974	0.5512113856211859	3.209110582925943	182	0	30	0.32967032967032966	alpha
CALX_HUMAN	47	2.506982645214273	4.1065304105745515e-4	-1.2967501139487345	2.2935025892732095	1.8088281326197864	11.72319224758116	target	5	0	stabilized	2.461569123134716	2.610095770471899	2.506982645214273	184	0	31	0.33695652173913043	alpha
CMBL_HUMAN	52	3.288891005034841	-6.364614037808059e-5	-0.9224778516869733	1.0004495761507948	0.4586353465600491	6.8963176539495805	target	0	2	destabilized	2.445310094720228	0.3176772338604875	3.288891005034841	185	0	31	0.33513513513513515	alpha
NAA25_HUMAN	37	2.6754833134225438	3.2713495084131945e-4	-3.773453844918757	4.772062318149816	3.285888126552181	11.410958610642743	target	3	0	stabilized	2.4345741753004684	3.285888126552181	2.6754833134225438	188	0	33	0.35106382978723405	alpha
DESM_HUMAN	47	0.14983398867752856	-1.9290088993853468e-4	-0.6273154495165865	1.0009770976209142	0.5834733315161629	2.9791712363277423	target	1	4	destabilized	2.432403705102398	0.25696443091829796	0.14983398867752856	190	0	34	0.35789473684210527	alpha
IF4G1_HUMAN	37	-1.4567605325098605	1.0373414977835672e-4	-2.348108159435358	3.340252019495667	2.423265686718198	11.287621807994604	target	1	0	stabilized	2.423706710090822	2.423265686718198	-1.4567605325098605	192	0	35	0.3645833333333333	alpha
SERB_HUMAN	42	-6.17970909168427	-0.008217403941360436	-1.546928026759784	1.0034651414686864	0.22089230795690068	11.037489149473812	target	0	2	destabilized	2.4012975828694647	0.22089230795690068	4.315585317606496	195	0	37	0.37948717948717947	alpha
EEA1_HUMAN	37	3.338760700856966	-5.959739383701957e-4	-0.9081425348646641	1.0285706708323945	0.45739296406546187	3.941071920670634	target	0	4	destabilized	2.4008381699702825	0.45739296406546187	3.338760700856966	196	0	37	0.37755102040816324	alpha
PNPH_HUMAN	37	-0.4093361212124678	-2.576209771961631e-4	-0.8551747019263207	1.0008237451916748	0.5140932552200538	10.944515972858117	target	0	3	destabilized	2.392838506411564	0.3455576600147434	3.9556102090132663	198	0	38	0.3838383838383838	alpha
DCTN4_HUMAN	52	3.0169253714347777	6.780866114244148e-4	-1.7888116690062292	2.812955070656303	2.4659074928797455	3.458640503287814	target	2	0	stabilized	2.3822476921609326	2.4659074928797455	3.0169253714347777	199	0	38	0.38190954773869346	alpha
ROA1_HUMAN	37	2.7830957600182153	2.9990632323485236e-4	-2.4816028705238513	3.6536246369422614	2.8354260633438884	5.238296786310823	target	2	0	stabilized	2.379951294263109	2.8354260633438884	2.7830957600182153	200	0	38	0.38	alpha
UBP2L_HUMAN	57	-2.200765858559112	1.0620298811803378e-4	-2.858199110450161	3.8767670160878254	2.8204913530954268	10.737423763516654	target	1	0	stabilized	2.3737351872634367	2.8204913530954268	-2.200765858559112	201	0	38	0.3781094527363184	alpha
TPD53_HUMAN	57	2.6887721081456943	4.3984507828325744e-4	-3.0320045985298254	4.0490468957836026	2.9976414569104883	5.934668631542364	target	6	0	stabilized	2.3695356942735106	7.24412610889399	4.3413404648655725	203	0	39	0.3842364532019704	alpha
CHM4B_HUMAN	37	-2.1290410093157326	-6.405925400832943e-5	-0.7013416702491125	1.0064663567922127	0.532110784293176	5.470467258789176	target	0	2	destabilized	2.3604475171996424	0.532110784293176	4.297264859936297	204	0	39	0.38235294117647056	alpha
BCAT2_HUMAN	62	2.2586298044471143	-2.7161370033854364e-4	-1.0623885614668447	1.0029094866119912	0.3795376705427641	10.530227070674568	target	0	1	destabilized	2.3542498900800064	0.3795376705427641	2.2586298044471143	206	0	40	0.3883495145631068	alpha
RIOX1_HUMAN	67	1.4523056263066678	-7.298813745681964e-4	-1.8819003075174217	1.053336294743429	0.05025186825879342	6.1500602859458855	target	1	2	destabilized	2.354125159884073	0.05025186825879342	1.5333805416260256	207	0	40	0.3864734299516908	alpha
COR1C_HUMAN	37	2.513250099338714	3.2375682501503233e-4	-4.15135768685498	5.153609356057304	3.8233209065475053	10.495471871446021	target	2	0	stabilized	2.3509439138098336	3.8233209065475053	2.513250099338714	208	0	40	0.38461538461538464	alpha
ISOC1_HUMAN	37	3.858699463867071	-7.34913685365441e-4	-0.7935313369740967	1.0205123749135079	0.536464498603024	10.449390585119934	target	0	3	destabilized	2.3465436594969016	0.536464498603024	3.858699463867071	210	0	41	0.3904761904761905	alpha
PSD1_HUMAN	37	1.8383728527005352	-5.135516372852695e-4	-1.0713150561641718	1.0199379971594975	0.3893577477539407	10.370691059606854	target	0	3	destabilized	2.3389836602917424	0.3893577477539407	1.8383728527005352	213	0	43	0.40375586854460094	alpha
RBMX_HUMAN	57	2.194856625203948	-1.5660387957754606e-4	-1.3381905951691708	0.9636882651974669	0.21283267937999406	9.934859601904177	target	0	1	destabilized	2.2960497442385197	0.21283267937999406	2.194856625203948	222	0	51	0.4594594594594595	alpha
NUP43_HUMAN	42	2.3496753301577677	2.1145176613874197e-4	-1.2385597100557173	2.2458464133161167	1.7919975764825216	6.067985355610566	target	4	0	stabilized	2.2647398915872903	3.180741832324363	2.3496753301577677	226	0	54	0.4778761061946903	alpha
SAE2_HUMAN	37	-88.38813980889111	0.010114061101578057	-5.516479888138381	6.518364551638525	1.7638770229470346	9.604804030116071	target	2	1	stabilized	2.262263393109314	1.7638770229470346	4.024544696924693	227	0	54	0.47577092511013214	alpha
CAZA2_HUMAN	57	2.198556383701372	5.012387391707196e-4	-1.7227269496079798	2.7257257147169263	2.0576781130359616	9.54266496213941	target	6	0	stabilized	2.2557727925865345	2.7137559346655236	3.9592257883725277	228	0	54	0.47368421052631576	alpha
RPB4_HUMAN	37	2.5915645845501136	1.4812934458570008e-4	-0.98792398833534	1.9837675210076833	1.594279390950337	3.3704784643747168	target	4	0	stabilized	2.2443930017041946	2.967521121229986	2.5915645845501136	230	0	55	0.4782608695652174	alpha
EIF1B_HUMAN	37	0.6205408575304967	-7.287872713476867e-5	-1.3762587685421992	1.0445440184380135	0.22842997419835753	4.858161232906183	target	0	5	destabilized	2.231665165104213	0.21230109553558674	0.6205408575304967	232	0	56	0.4827586206896552	alpha
SCLY_HUMAN	37	2.7668885010218482	-6.597618868844287e-4	-0.639985263256887	0.996160683378729	0.5325545398135396	9.26237545881592	target	1	2	destabilized	2.2259605447899395	0.5015688335480081	2.7668885010218482	233	0	56	0.48068669527896996	alpha
SNUT2_HUMAN	52	1.92431614702385	3.551020060634676e-4	-1.9608607300097953	2.968550809197802	2.2121952669564027	3.6588133819152153	target	4	0	stabilized	2.2255848698883365	2.3822604098221234	1.92431614702385	234	0	56	0.47863247863247865	alpha
CP2J2_HUMAN	52	2.5842628191643326	-3.9865432699237645e-4	-1.1361344787290943	1.0001831925476325	0.20228031450073636	5.45359932336458	target	0	6	destabilized	2.2078191028337457	0.1239200124484877	2.9870890920815607	239	0	60	0.502092050209205	alpha
NAGK_HUMAN	37	3.585091532115914	-2.9013718447963186e-4	-0.7689784667433055	0.9997372215722633	0.47402878188490216	2.614464993172673	target	0	4	destabilized	2.1977584223778557	0.33495874918027924	3.585091532115914	240	0	60	0.5	alpha
MK01_HUMAN	37	0.866442395856403	1.950317522302216e-4	-1.5086871281452057	2.5120301065194783	1.9731330626080876	5.975987269192408	target	3	0	stabilized	2.1718235946471927	2.005047427836228	0.866442395856403	245	0	64	0.5224489795918368	alpha
LICH_HUMAN	67	-5.738770730379378	-0.011159508938024459	-1.225695358000589	1.0063970741448223	0.4019615686598356	8.746608343487829	target	0	1	destabilized	2.168666007339186	0.4019615686598356	-5.738770730379378	246	0	64	0.5203252032520326	alpha
PUR8_HUMAN	37	2.16558978378651	-4.3451748753880955e-4	-0.856097309855576	1.0055265017388597	0.47997347740583635	8.71629967938364	target	0	5	destabilized	2.165194799164965	0.47997347740583635	2.16558978378651	247	0	64	0.5182186234817814	alpha
HPRT_HUMAN	37	2.414918419505981	-2.944718586108267e-4	-0.7422595638429768	1.0007113406613954	0.5626116107270076	7.070739022652654	target	0	4	destabilized	2.164238251804811	0.3492645871898747	2.414918419505981	248	0	64	0.5161290322580645	alpha
PSA1_HUMAN	37	-6.011521280237176	-0.02383564050013885	-0.898998765950641	1.000319110333293	0.6150877115152706	8.700859612684702	target	0	1	destabilized	2.163421826835254	0.6150877115152706	-6.011521280237176	249	0	64	0.5140562248995983	alpha
C19L1_HUMAN	37	1.553506404299262	-2.2383446871419426e-4	-1.539754501205255	1.0095892000678963	0.05832029960980227	2.8763525598232604	target	0	3	destabilized	2.1602746205471814	0.05832029960980227	1.553506404299262	250	0	64	0.512	alpha
SRRT_HUMAN	37	1.9540391637105567	5.208165428925162e-4	-4.399748531969582	5.42922361072597	3.753930660937271	8.448469385916617	target	3	1	stabilized	2.1339852872003098	3.753930660937271	1.9540391637105567	254	0	67	0.5275590551181102	alpha
UBE2N_HUMAN	37	-0.34162105190058956	1.6764947396760618e-4	-3.215060182179567	4.237595862164426	2.9293969118367813	8.3339725098298	target	5	0	stabilized	2.1203402344382822	3.132187113780965	2.8913339890317022	260	0	72	0.5538461538461539	alpha
KDM3B_HUMAN	37	1.460094785674852	2.8140125993643633e-4	-1.6997759151721932	2.7052276084023315	2.0714695142884794	8.321693795963494	target	2	0	stabilized	2.11886581535888	3.3691066937597753	1.460094785674852	261	0	72	0.5517241379310345	alpha
TBA1A_HUMAN	42	2.498145875416703	-0.0011843226655359241	-0.778268689126604	0.916979584738516	0.4461131023880307	8.256930028288956	target	0	4	destabilized	2.1110528511701196	0.3019021633141429	2.498145875416703	264	0	74	0.5606060606060606	alpha
THIL_HUMAN	52	4.065470564182394	8.56256263065158	0.5629220480845001	0.6256121665560874	1.572295685713416	2.4919046884909424	target	4	0	stabilized	2.1065344904463497	6.28641380375677	3.097387603878359	265	0	74	0.5584905660377358	alpha
LYPL1_HUMAN	52	-1.1941295538102312	-0.06723099670772313	-1.3611776420671604	1.0013125653612505	0.4955495189844056	8.06080807469733	target	0	1	destabilized	2.087013808899716	0.4955495189844056	-1.1941295538102312	269	0	77	0.5724907063197026	alpha
OGFR_HUMAN	37	2.660029168821185	-7.254601713334607e-4	-0.9851276568842569	1.0008349960800413	0.39199265304026704	8.052645178684482	target	0	1	destabilized	2.086000631080812	0.39199265304026704	2.660029168821185	270	0	77	0.5703703703703704	alpha
VPS4A_HUMAN	42	1.952579412454704	-1.6388340316461565e-4	-1.3927772899209039	1.0153174557193247	0.23514776586148936	8.011424207601992	target	0	1	destabilized	2.0808685489706935	0.23514776586148936	1.952579412454704	271	0	77	0.5682656826568265	alpha
Z3H7B_HUMAN	42	1.8250103326375178	-3.600282543035863e-4	-0.8964327796517517	1.002930910145558	0.4542412187966548	7.9922992322864985	target	0	1	destabilized	2.078478482122627	0.4542412187966548	1.8250103326375178	275	0	80	0.5818181818181818	alpha
SUMO1_HUMAN	62	3.0830026596659934	5.192756454833617e-4	-1.054124281638754	2.060510256846122	1.7433516825117616	3.5144148769980426	target	6	0	stabilized	2.073725093250241	1.820550801796431	3.407872131444719	277	0	81	0.5848375451263538	alpha
RANDOM11164	37	-5.042901039008825	-4.147567418557334e-5	-1.137013866951815	0.9989855575996032	0.24045326850685983	7.945224098666984	target	0	2	destabilized	2.0725710058422417	0.24045326850685983	2.0624468603279866	278	0	81	0.5827338129496403	alpha
MTDC_HUMAN	57	1.8404366784932245	0.06275526628454096	-0.9782187677755572	1.978467043926896	1.6082779484836016	3.002295858269902	target	5	0	stabilized	2.0576211142459764	2.82037056514676	3.3469987696451904	284	0	86	0.6056338028169014	alpha
ADT4_HUMAN	67	2.6933480602982938	2.3307700255606784e-4	-1.8788302772018195	2.8895669658687946	2.381559575459837	4.121142557880344	target	2	0	stabilized	2.0558485666418695	3.1138689038037572	3.5132644120933505	285	0	86	0.6035087719298246	alpha
RPB3_HUMAN	47	2.7348570081364256	3.4612976691046117e-4	-1.590642401228724	2.619043115209934	2.1050222334330635	3.72341637278682	target	3	0	stabilized	2.0481211550834897	2.65852667072496	2.666728107236502	287	0	87	0.6062717770034843	alpha
HCD2_HUMAN	52	3.8378299588614313	5.180723992199501	0.7987157117741079	0.4608626026870406	1.6314009032434815	3.083065717639367	target	5	0	stabilized	2.0468860618792197	4.79518443519443	3.386303828931215	289	0	88	0.6089965397923875	alpha
DCTN1_HUMAN	57	1.9491710429725755	-2.336134745677906e-4	-1.130929744284365	0.9063313330108116	0.26336100669142914	7.74169871563001	target	0	3	destabilized	2.046621135824732	0.2611366850007944	3.3519992078407315	290	0	88	0.6068965517241379	alpha
HNRH1_HUMAN	47	3.2442948347273433	8.519820219495042e-4	-1.4590275078229364	2.470576586522911	1.9209654011376216	7.570955026786518	target	5	0	stabilized	2.024319218908905	9.549115730150648	3.1658250751164134	296	0	93	0.6283783783783784	alpha
TPP2_HUMAN	37	3.073864336321971	-7.155492101624482e-4	-0.6167652326376517	0.9462735273350781	0.5433202022698228	4.808750847963953	target	1	5	destabilized	2.012841315466957	0.3126996259631844	3.073864336321971	299	0	95	0.6354515050167224	alpha
SOGA1_HUMAN	57	2.316437164105679	-5.323295692541997e-4	-1.1705943508477554	1.0130240119301321	0.33958320889054844	3.9020467491880035	target	1	2	destabilized	1.993855403665144	0.26788358143932417	2.945439711212102	304	0	99	0.6513157894736842	alpha
TPMT_HUMAN	37	2.248832713102292	-5.526628591817983e-4	-0.9195583984094169	1.01709037085397	0.40338842918900236	4.484292342718755	target	0	4	destabilized	1.992598462275916	0.40338842918900236	2.248832713102292	305	0	99	0.6491803278688525	alpha
CAPR1_HUMAN	67	2.7069037536040903	1.8729110499046778e-4	-1.059782276569986	2.0549046854464472	1.660086545138974	7.326060156757405	target	4	0	stabilized	1.9914378757285065	1.8192962820508454	3.4247488276721367	307	0	100	0.6514657980456026	alpha
XRCC6_HUMAN	37	3.1938927566971	5.844271732168071e-4	-3.454683306044148	4.453224486490188	3.257429771531692	7.285979495047269	target	3	1	stabilized	1.9859518842874997	3.257429771531692	3.1938927566971	308	0	100	0.6493506493506493	alpha
BAG3_HUMAN	52	2.978257471643084	7.497109728937534e-4	-2.132209249205745	3.1302093630191776	2.4127334066545236	7.274952408644127	target	2	0	stabilized	1.9844372712690286	3.600325945872481	3.163853896217932	309	0	100	0.6472491909385113	alpha
FTO_HUMAN	37	-31.51599940927589	-2.0191543904798926e-5	-1.8363439712611744	1.0459910524831837	0.07091590665439398	7.181338552039155	target	0	2	destabilized	1.983784222998211	0.07091590665439398	3.1041132231523063	310	0	100	0.6451612903225806	alpha
GGCT_HUMAN	42	3.0259482260393504	-8.197927582459987e-4	-0.5281934775914372	1.0003579539142888	0.6182352033357316	3.006714664233388	target	0	3	destabilized	1.9720629957077849	0.5215326110731829	3.2625919831895103	315	0	104	0.6603174603174603	alpha
DNPH1_HUMAN	62	3.189770681392002	-1.1228329966341199e-4	-1.1177719049725976	1.0168570507804204	0.23249779987106298	2.5676962926679834	target	0	4	destabilized	1.9679464505326063	0.21678856953126016	2.5891237746407487	316	0	104	0.6582278481012658	alpha
DOCK9_HUMAN	37	-5.912000548711211	-0.07714810619439906	-3.6195855872752443	1.005320646270478	0.2757364420692359	5.156827853748123	target	0	2	destabilized	1.9635057629852588	0.2757364420692359	1.3442135039198653	318	0	105	0.660377358490566	alpha
DRG2_HUMAN	37	2.9958445031481835	-0.0010567460615223364	-0.6747814349946741	0.991743948701476	0.5790891549176768	4.653235164331142	target	1	2	destabilized	1.9624547618014474	0.5790891549176768	2.9958445031481835	319	0	105	0.658307210031348	alpha
K1C13_HUMAN	67	-4.282624098460266	6.064416797298298e-5	-1.5509098769030767	2.5503370155885166	2.1040460437652535	7.093435525091246	target	2	0	stabilized	1.9591697824343464	2.1040460437652535	3.5019169696330965	321	0	106	0.660436137071651	alpha
ULA1_HUMAN	47	2.511219794736296	-7.916730595782129e-4	-0.6963231101895129	1.0032652264408097	0.5707272901572314	7.077527208454979	target	0	3	destabilized	1.9569245823561154	0.4201561893359379	3.5726099594185787	323	0	107	0.6625386996904025	alpha
TRM6_HUMAN	57	-0.2890924838275948	6.0643205373397916e-5	-1.8125598520600026	2.83052944533765	2.3495970692234636	2.913075739548586	target	3	0	stabilized	1.9541447434520525	2.3495970692234636	3.118326176925636	326	0	109	0.6687116564417178	alpha
SMC4_HUMAN	37	-1.0757023522060065	-8.57443444683665e-5	-1.0545228357206093	0.9763657693555322	0.28930504787166306	6.968534658885034	target	2	3	destabilized	1.9414049672157774	0.029687057755749594	3.4429398357118197	336	0	118	0.7023809523809523	alpha
SERC_HUMAN	67	0.015421229761179368	-0.008040817857086187	-0.6209059328637496	1.0008823806179803	0.6442852006122166	4.557687721152271	target	1	3	destabilized	1.9015196439500381	0.5773946898036548	3.2382993245823597	348	0	129	0.7413793103448276	alpha
FEN1_HUMAN	37	2.6659451948987347	4.513255847506454e-4	-1.6291950314447599	2.6537177584193894	1.9732205187891707	6.685916566850228	target	3	0	stabilized	1.900003309136054	2.6295466278319557	2.6659451948987347	349	0	129	0.7392550143266475	alpha
KIF5C_HUMAN	37	2.2186982830951782	-4.4004837741153194e-4	-1.2448550387996233	1.0173383975146246	0.29939326908800584	6.583465937593223	target	0	2	destabilized	1.884561344895389	0.29939326908800584	2.2186982830951782	357	0	136	0.7619047619047619	alpha
GLSK_HUMAN	62	2.720637662542971	5.614571649739992e-4	-3.212798892044142	4.35322631725536	3.5982969712539745	6.325662080111414	target	5	0	stabilized	1.8821360191442977	3.5982969712539745	3.259136454823266	358	0	136	0.7597765363128491	alpha
ZPR1_HUMAN	62	2.1752188943604795	-3.417892612240216e-4	-1.2290855259533002	0.9714225805285696	0.28049081307156476	6.557354077649561	target	1	3	destabilized	1.8805871797700926	0.28049081307156476	3.1367657046666286	359	0	136	0.7576601671309192	alpha
AATC_HUMAN	37	-2.5033448029718786	-0.005085935765900966	-0.8110263421711884	1.000086017539562	0.5348862351730075	6.478216144041816	target	0	1	destabilized	1.8684451860526232	0.5348862351730075	-2.5033448029718786	365	0	141	0.7726027397260274	alpha
IF4H_HUMAN	62	-2.8108091519623954	7.555944552640875e-5	-1.3821750931168353	2.37550458790175	1.9471115710795956	5.4419838846545705	target	2	0	stabilized	1.8678553723696534	1.9471115710795956	-2.8108091519623954	366	0	141	0.7704918032786885	alpha
CPNS1_HUMAN	37	-0.45389776397957443	-1.8815421296172413e-4	-0.9995567937775078	1.0306594731883016	0.3228317288001137	2.136507436922848	target	0	5	destabilized	1.863667439249656	0.2676216259070857	3.1615833357625105	367	0	141	0.7683923705722071	alpha
HS71A_HUMAN	37	1.4337404463931054	0.006064066113433482	-2.157649362812398	3.1587030231101108	2.3210525037307423	6.389427758663893	target	2	0	stabilized	1.8546447117446083	2.352672477286481	1.4337404463931054	370	0	143	0.772972972972973	alpha
CL029_HUMAN	42	2.2991497656316167	-4.5372850353174134e-4	-0.762857208737813	1.0077932423006908	0.5451860372374586	3.255474203054978	target	0	4	destabilized	1.853976562817493	0.4207525029300866	2.971862430682805	371	0	143	0.77088948787062	alpha
FRIH_HUMAN	67	2.42331625674545	-6.431121504463718e-4	-0.8730611929310389	1.012881860174616	0.4602759294558207	2.603183770866205	target	0	7	destabilized	1.852715132737862	0.2518541335551108	2.961183435912749	372	0	143	0.7688172043010753	alpha
DTD1_HUMAN	37	3.1763443503333706	-7.760904683821319e-4	-1.2436834606961558	0.9951285190075825	0.2782501494707276	6.321745859409417	target	0	4	destabilized	1.8439954135879737	0.2782501494707276	3.1763443503333706	377	0	147	0.7798408488063661	alpha
MESD_HUMAN	37	-41.25821883518847	-0.02936318760608736	-7.315276955551674	1.001344243628824	0.5820053394036406	6.29837113623143	target	0	1	destabilized	1.840291050163189	0.5820053394036406	-41.25821883518847	380	0	149	0.7842105263157895	alpha
LMNB1_HUMAN	42	4.611023271228339	-1.8153954199456258e-4	-1.1132086327554578	0.9964368859655925	0.2981403257668167	6.218260567791903	target	0	2	destabilized	1.82749021616092	0.22660836653213906	3.015963917894894	387	0	155	0.8010335917312662	alpha
PPAC_HUMAN	37	-4.924820229346214	7.526306427566572e-5	-2.1078167851358627	3.1078428864990735	2.467841455694029	4.756769499949387	target	4	2	stabilized	1.8128272263552323	2.467841455694029	2.954172350369628	395	0	162	0.8202531645569621	alpha
PSB4_HUMAN	37	2.825963601662484	-4.0932458185671296e-4	-0.620661986262323	0.9986752101771574	0.6018267609553175	6.116530162543742	target	0	1	destabilized	1.8109949688331053	0.6018267609553175	2.825963601662484	396	0	162	0.8181818181818182	alpha
ALDOC_HUMAN	37	4.279445092353877	-8.875779306772577	0.36794159740192633	0.8860294823076394	0.6496890991423779	3.4817351141965305	target	0	5	destabilized	1.789913846050728	0.2007498343847465	4.279445092353877	404	0	169	0.8366336633663366	alpha
HAP28_HUMAN	52	1.8526501736849903	1.672748409714739e-4	-1.4034723182936097	2.4060771488980808	1.924808978395875	5.981927159893004	target	2	0	stabilized	1.7887427835861465	2.0803784802954812	2.6564613065118836	406	0	170	0.8374384236453202	alpha
PROF2_HUMAN	37	2.8238880854681407	8.107372631356684e-4	-3.939329206658134	4.942132122425773	3.5375125410196664	5.96100685516699	target	1	0	stabilized	1.7852394022399785	3.5375125410196664	2.8238880854681407	407	0	170	0.8353808353808354	alpha
CLH1_HUMAN	37	2.507495518057227	3.0160942760609164e-4	-4.5569260764371675	6.427495387818654	4.8314629233068125	5.932391680100287	target	3	0	stabilized	1.780427450433788	4.8314629233068125	2.507495518057227	413	0	175	0.847457627118644	alpha
IMDH2_HUMAN	57	-1.6988528198375334	4.1843805731578455e-5	-1.6725804826114614	2.6742868885402564	2.1598473866205232	5.930645350586542	target	3	0	stabilized	1.7801330351804525	2.1598473866205232	3.801675653664304	414	0	175	0.8454106280193237	alpha
STMN1_HUMAN	57	1.5533614424562268	-0.006079951637924903	-0.7201063447512076	1.0019351695701093	0.5495201934281435	5.812876323422867	target	0	1	destabilized	1.7600755126323713	0.5495201934281435	1.5533614424562268	419	0	179	0.8544152744630071	alpha
TKT_HUMAN	37	1.6907062593206506	-0.025348083492255508	-0.6031545857883591	1.0011131095639834	0.612656189996145	5.795659964448295	target	0	3	destabilized	1.7571093554579915	0.4608378599484871	1.6907062593206506	423	0	182	0.8605200945626478	alpha
H2B1C_HUMAN	52	-0.29796639065312414	1.130725504356238e-4	-3.008611542612504	3.9858173473595064	3.1319825048007957	5.764693603905968	target	3	0	stabilized	1.7517520046774084	6.127741385892054	3.3417712841416902	426	0	184	0.863849765258216	alpha
TLR5_HUMAN	37	-48.391730925925756	-3.7317824870595497e-4	-0.7548637670884333	1.0015695020367055	0.49753929268993363	5.740528447883552	target	1	2	destabilized	1.7475512701850477	0.49122985431078237	3.2993851737962325	432	0	189	0.875	alpha
MYL6_HUMAN	37	2.930594498731285	6.158972214392236e-4	-1.0787097162632462	2.0803123485349	1.7612850324203628	5.7398612579578785	target	4	2	stabilized	1.747435038951872	1.7612850324203628	2.930594498731285	433	0	189	0.8729792147806005	alpha
TPM1_HUMAN	37	-1.523591298465296	-1.1290701319476838e-4	-1.1726285910334848	1.0002453852465425	0.21216105140229358	5.686055214292088	target	0	6	destabilized	1.7380167237500899	0.028198622974193035	3.0818854762515997	437	0	192	0.8787185354691075	alpha
GLYM_HUMAN	62	1.6417726862733462	0.002407288076060049	-1.1642566209553236	2.164277498421583	1.7357564363473672	5.151703353736816	target	5	1	stabilized	1.732188292348821	2.0509435843973685	3.3499573550290314	441	0	195	0.8843537414965986	alpha
DNA2_HUMAN	52	2.8996929964454696	-8.220174947398628e-4	-0.8433851712616156	1.0040583662086644	0.41620119703589115	2.8718136044072913	target	0	4	destabilized	1.730038886933049	0.41620119703589115	3.125005271865582	444	0	197	0.8873873873873874	alpha
GGH_HUMAN	67	2.153488477544415	-8.104933709853255e-5	-0.9042461963000501	1.0040943731089838	0.4393047372164737	5.58793728445013	target	0	1	destabilized	1.7206102180765679	0.4393047372164737	2.153488477544415	451	0	203	0.9002217294900222	alpha
CCNB1_HUMAN	42	4.013514547741547	-6.358080324191725	0.5638207774072216	0.7907808246774234	0.5389273109328685	2.393967777063531	target	0	2	destabilized	1.7183970434197602	0.5389273109328685	4.013514547741547	452	0	203	0.8982300884955752	alpha
ACTN4_HUMAN	37	1.7765284314990333	-0.04537237528186003	-0.6104181728557949	1.0007392802134087	0.6248852295603092	5.509479882862773	target	0	1	destabilized	1.7064702235845994	0.6248852295603092	1.7765284314990333	458	0	208	0.9082969432314411	alpha
DEK_HUMAN	42	2.913467278425386	8.321235146253666e-4	-1.7792367408438134	2.786887053702972	2.1554998050737098	5.487138526960649	target	5	0	stabilized	1.702406904151565	5.033615693696799	3.158727447395953	459	0	208	0.906318082788671	alpha
HS902_HUMAN	62	2.4730502108537347	-8.066490775532195e-4	-1.0336275786900477	1.0013067056039253	0.3953395889736719	5.460398713972437	target	0	2	destabilized	1.6975218116277284	0.3175307389336518	3.4741443072528635	460	0	208	0.9043478260869565	alpha
MYLK_HUMAN	37	1.8461503528817462	-0.0010963807892325507	-0.944519616507778	1.0252190153213794	0.43018186418566734	5.432473115169761	target	0	2	destabilized	1.6923944842489052	0.34953134824683135	1.8461503528817462	465	0	212	0.9118279569892473	alpha
ROA2_HUMAN	37	2.9013465488186654	8.065614105522979e-4	-3.1085525268938223	4.110943917049068	3.2160492594296985	4.607946844661855	target	6	0	stabilized	1.679932996167408	3.343055042735176	2.9013465488186654	472	0	218	0.923728813559322	alpha
PHS_HUMAN	37	1.8389236322103033	-1.6085459126731922e-4	-0.7287086387616225	0.9997593303404309	0.5681466702713694	5.3586163468427666	target	0	1	destabilized	1.678705797511997	0.5681466702713694	1.8389236322103033	474	0	219	0.9240506329113924	alpha
PFD6_HUMAN	37	2.011445070587667	-5.895769414486354e-5	-0.5271487936921759	1.001134777458357	0.6557421297248485	5.249958751384591	target	1	2	destabilized	1.6582202196935414	0.6097616174184403	2.011445070587667	483	0	227	0.9399585921325052	alpha
EXOC4_HUMAN	67	1.6367848739443238	-0.09704043270414796	-1.4284567944664117	1.0103841139613123	0.35703319420761287	2.7154643718328355	target	0	2	destabilized	1.6394655231661546	0.35703319420761287	2.3755227928617364	497	0	240	0.96579476861167	alpha
AR6P4_HUMAN	67	3.5313658264529155	7.463568007370386	0.577502300788528	0.6157358101296246	1.5347459792943854	2.3990150813258246	target	2	0	stabilized	1.6372793239241914	1.6804224531658434	3.990260408615696	503	0	245	0.974155069582505	alpha
DOC11_HUMAN	37	3.201923428711218	-2.734817536806715e-4	-1.3577286215442075	1.0276287658309158	0.26432195661738617	5.048982148750015	target	0	3	destabilized	1.6191866682694223	0.26432195661738617	3.201923428711218	515	0	256	0.9941747572815534	alpha
GARS_HUMAN	67	2.8482441251208113	-0.001047086356248923	-1.1394991864127497	1.0792842633368211	0.42409122668768784	5.035301578740313	target	0	2	destabilized	1.6164734208495568	0.42409122668768784	3.2088487145988704	517	0	257	0.9941972920696325	alpha
SAMH1_HUMAN	47	-0.49599038280264246	0.06259208164504998	-2.218552866034182	3.227549394268858	1.9887274252877831	5.0054893759689305	target	1	0	stabilized	1.6105351854036536	1.9887274252877831	-0.49599038280264246	519	0	258	0.9942196531791907	alpha
NEST_HUMAN	52	2.518182370167178	5.345331417470263e-4	-3.206051783406421	4.2302577808510575	3.362250577942834	3.1581523957329565	target	4	0	stabilized	1.604882236508162	3.362250577942834	1.5373156725320836	525	0	263	1	alpha
GLOD4_HUMAN	37	-0.49038319421795584	3.419108687410697e-5	-1.3844984169212498	2.3916546019054605	1.998083964937491	4.93221666845296	target	2	1	stabilized	1.5957885154914433	2.123148050298929	3.9376766616409937	530	0	267	1	alpha
MAGD2_HUMAN	37	3.8688916867015437	-6.607668420296294e-4	-1.5517040994500955	1.0264731632472137	0.13335990451155763	4.907525638823985	target	0	1	destabilized	1.5907698715713343	0.13335990451155763	3.8688916867015437	533	0	269	1	alpha
PUF60_HUMAN	37	2.432723188265896	1.98930418428662e-4	-1.7617359897592773	2.748314842176074	2.2412524909457363	4.890261557266824	target	3	0	stabilized	1.5872457902499628	2.2412524909457363	2.432723188265896	536	0	271	1	alpha
LZIC_HUMAN	37	2.5290163299171327	-7.894993704366919e-4	-0.699579615103535	1.00099428873064	0.5293957985463799	2.413442806414092	target	0	4	destabilized	1.5865326935553639	0.5039109633916561	2.5290163299171327	538	0	272	1	alpha
NUCKS_HUMAN	42	0.7878164380555952	-2.3418059511947373e-4	-0.9921057736714387	1.0116040095122851	0.4097315934274432	3.2586961230247513	target	0	4	destabilized	1.576515753907151	0.13444491993985094	2.2106263262647188	546	0	279	1	alpha
PNPT1_HUMAN	37	3.2376433641037448	3.173969689869583e-5	-3.729368596796906	4.725593088961112	3.4519433542297957	4.7258702404909085	target	1	0	stabilized	1.553051721868716	3.4519433542297957	3.2376433641037448	572	0	304	1	alpha
GSTO1_HUMAN	42	2.961451686786692	-7.517861407527024e-4	-0.5528683613285625	0.9975201951488888	0.6240421474412888	4.691667817642657	target	0	1	destabilized	1.5457881306810937	0.6240421474412888	2.961451686786692	574	0	305	1	alpha
TXLNA_HUMAN	37	-3.3233070960763222	6.801828593946366e-5	-2.741572032531863	3.7320411073756015	3.0206703204944643	3.3982506680660234	target	3	0	stabilized	1.5433362488682016	3.0206703204944643	2.2121472963665223	578	0	308	1	alpha
VAV2_HUMAN	37	-15.140512093244103	-3.815866599340195e-5	-1.2388005769285082	1.021816015760869	0.288935440995792	4.642681928444631	target	0	2	destabilized	1.535292201079415	0.13986986130360593	-15.140512093244103	585	0	314	1	alpha
ATX2L_HUMAN	52	2.214501240318865	1.4638836784694874e-4	-3.836380391475549	4.836310987384976	3.852118905113888	4.606431226410856	target	4	0	stabilized	1.5274534197714447	4.39146661131143	5.029341255132797	591	0	319	1	alpha
MANF_HUMAN	37	2.336879757159151	2.229247315650376e-4	-0.6276355582025481	1.6276370477925768	1.502981515144635	2.8422772440961195	target	5	0	stabilized	1.5185359343325426	1.6993382452845245	2.336879757159151	600	0	327	1	alpha
ST1A1_HUMAN	42	1.277774212046965	-1.678411952577922e-4	-0.7457706053671807	0.8885120477823492	0.3292870759552771	3.2136128310607535	target	0	2	destabilized	1.5058191512142853	0.2691269664285149	1.277774212046965	610	0	336	1	alpha
AIF1L_HUMAN	37	2.3885634345469136	-3.3801405672026236e-4	-0.8880941140623237	1.0027976048993907	0.43047656080516533	4.497780946150804	target	0	2	destabilized	1.5035841520735043	0.43047656080516533	2.3885634345469136	613	0	338	1	alpha
GPX4_HUMAN	37	-63.46889308696705	0.01251702934927785	-24.748755162651825	25.750569529252253	5.472151973025383	4.4912152864112596	target	4	0	stabilized	1.5021233302559684	5.472151973025383	4.426697375168811	616	0	340	1	alpha
ARF5_HUMAN	42	3.939729569566643	-5.629911216939143	0.5975360490515049	0.8113262025891335	0.4892338056424606	2.5263213802647413	target	0	2	destabilized	1.50057920947192	0.4892338056424606	3.939729569566643	618	0	341	1	alpha
RS3_HUMAN	47	3.905779982235612	-6.434056996722256	0.47696016498957805	0.8289443259615912	0.6504714846300089	2.2366946727791905	target	0	2	destabilized	1.4966047621032263	0.4982661914311601	3.8147010968932324	623	0	345	1	alpha
AN32B_HUMAN	62	3.4267269412342	-6.857380711897261e-4	-1.0430202074219166	1.0073945425344906	0.353259973475696	4.4375181863399575	target	0	3	destabilized	1.4900952531232674	0.353259973475696	3.9636086092564313	633	0	354	1	alpha
THUM1_HUMAN	37	2.290851114230668	-2.8336280923180245e-4	-0.5537507845688168	1.0044658727065865	0.6450258844635457	4.407502666776665	target	0	1	destabilized	1.4833082403439684	0.6450258844635457	2.290851114230668	636	0	356	1	alpha
PCNP_HUMAN	47	-3.4593018952139354	2.6754269425956888e-5	-7.834095965436681	8.82443447471315	6.513606465636484	4.358268887483763	target	2	0	stabilized	1.472074934362942	6.513606465636484	0.35310990446318796	646	0	365	1	alpha
DNJC7_HUMAN	37	-137.73330431347767	0.009308123898711053	-27.446966819406974	28.450109652722407	2.6982902973258316	4.3567913510404175	target	4	0	stabilized	1.4717358577720607	2.771086144520089	0.2996362729427272	647	0	365	1	alpha
ROAA_HUMAN	42	2.312056223523462	2.5141048642913567e-4	-0.754285142420291	1.7564026287682781	1.508411327557619	4.3456037247303065	target	7	0	stabilized	1.4691646960686373	4.199575830092299	2.6932885477513198	651	0	368	1	alpha
P5CS_HUMAN	37	2.234930605951218	6.937899052915367e-4	-11.55706679247932	12.528753648675044	9.444396767493286	4.319098460190744	target	1	0	stabilized	1.4630466907066175	9.444396767493286	2.234930605951218	655	0	371	1	alpha
NFH_HUMAN	37	3.1380645932638456	0.001013860566994447	-6.889079621208826	7.9075673017365515	5.996283815388876	4.301436510703916	target	5	0	stabilized	1.4589490391665298	5.996283815388876	3.1380645932638456	662	0	377	1	alpha
PDXK_HUMAN	57	2.039894958885186	4.721989670365142e-4	-2.243231468824505	3.250779665071822	2.5772247133828556	4.272568498576501	target	4	0	stabilized	1.452215168313614	2.5772247133828556	3.456568376739326	667	0	381	1	alpha
CNN3_HUMAN	57	3.2095594067290056	1.0747802643678659e-4	-1.05332950987045	2.0556008962164687	1.7840387627434826	3.604263560539983	target	2	1	stabilized	1.4384359018695283	1.7840387627434826	3.2095594067290056	678	0	391	1	alpha
UBE2S_HUMAN	52	0.03593424785985166	0.07487566621551196	-2.3299527919744834	3.338028400585408	2.0769564169890464	4.189196551257106	target	2	0	stabilized	1.4325089616703355	2.2562018504551955	0.03593424785985166	684	0	396	1	alpha
NUCB1_HUMAN	62	-196.067000584987	0.007003085486825847	-12.98542553162411	13.989351140322457	1.6996041996307287	2.0708696090376453	target	4	0	stabilized	1.4296104340477531	2.0405972502656557	2.9166271737521607	690	0	401	1	alpha
RCC1_HUMAN	52	3.089165512215943	8.299287297935759e-4	-1.5826545933265233	2.642933821500079	2.3940408359299625	2.2736507648845676	target	5	0	stabilized	1.4240767674649746	4.65656687089907	2.9580196475398157	698	0	408	1	alpha
BT3L4_HUMAN	42	3.0522309282360665	-7.186353052465158e-4	-0.7922505845372352	0.999005019338693	0.40482371358308056	2.374822097944509	target	0	5	destabilized	1.4229047947058229	0.40482371358308056	3.0522309282360665	703	0	412	1	alpha
VPS50_HUMAN	67	1.9029098785637428	2.096255541045673e-4	-3.6841951552651726	4.684547227659654	3.8243522079988637	4.127536375480133	target	5	0	stabilized	1.41768070973034	6.652500423347742	4.5494864627788445	708	0	416	1	alpha
UBE2T_HUMAN	42	2.3931929013379056	2.0474895465615828e-4	-2.5310527206167013	3.5357117115509253	3.077963938921492	2.2192721183636692	target	2	0	stabilized	1.4135614268430103	3.333056952804081	2.3931929013379056	714	0	421	1	alpha
ADHX_HUMAN	52	3.0782865691004653	-2.1658839189190278e-4	-0.5916773537381885	0.9933951053858048	0.5380293272571985	4.080995909024846	target	0	3	destabilized	1.4063410539788745	0.46669589543866724	3.050689168985132	722	0	428	1	alpha
IPYR_HUMAN	62	3.1376674380572087	3.5100719551963387e-4	-1.5868735269006777	2.602084143538669	2.288648391535763	4.0632330819733244	target	1	0	stabilized	1.401978982323822	2.288648391535763	3.1376674380572087	726	0	431	1	alpha
EXOS2_HUMAN	57	2.8689868864566366	3.6681433344821227e-4	-3.56003641319747	4.574245991228912	3.782183964855904	4.016276175278722	target	5	0	stabilized	1.390355148769668	9.177744826767132	2.395208464692757	740	0	444	1	alpha
ETFB_HUMAN	52	4.019205812623349	8.089453231705965	0.6537182904756342	0.49427474088454365	1.5425067898411977	3.987051866639153	target	3	0	stabilized	1.383052077253442	1.9041910737235377	4.061386032392443	752	0	455	1	alpha
PP1G_HUMAN	47	3.3609000921290377	7.190150277439492e-4	-0.7848764631722098	1.8308549444464017	1.7377806198859849	2.509145984569818	target	5	0	stabilized	1.3823900425358306	3.2654630850447055	3.027214629821193	753	0	455	1	alpha
XPP3_HUMAN	47	-11.4933761889182	3.074516840719027e-5	-1.8509104149674345	2.8754826446142934	2.279289264413267	3.931189838554719	target	2	0	stabilized	1.3689421379612088	3.0622120232647494	3.942332823214458	772	0	473	1	alpha
HDHD2_HUMAN	37	1.7617917213836904	-0.06559185822266447	-0.7857064113571476	1.001386573472781	0.5397086799036951	3.902529634013558	target	0	1	destabilized	1.361624966975943	0.5397086799036951	1.7617917213836904	782	0	482	1	alpha
MRP_HUMAN	42	2.008218777344057	0.10694355079062173	-1.4151409467883773	2.4178071346645105	1.8172909568422217	1.8611593307631242	target	5	0	stabilized	1.358392572414406	3.0798505808557453	2.008218777344057	786	0	485	1	alpha
JUPI2_HUMAN	52	-1.7899326343438773	6.909844331309474e-5	-2.9705553739934185	3.9610538330911855	3.1697276497805644	2.7863762776864562	target	4	0	stabilized	1.3571973553753978	6.416048988559293	2.137047371450151	788	0	486	1	alpha
UBA1_HUMAN	62	4.059130768948848	7.910169455158105	0.7270251033131256	0.5688542432955739	1.7169609756626976	2.2260570211378017	target	3	0	stabilized	1.3559251269493569	6.924029240347309	4.059130768948848	792	0	489	1	alpha
PSME3_HUMAN	37	0.02846409763158646	-8.429833877043323e-5	-0.5234114494912255	1.00005152789693	0.573405600279378	3.8697891779229514	target	0	3	destabilized	1.3532000295689184	0.546346530627783	0.02846409763158646	797	0	493	1	alpha
LDHC_HUMAN	37	2.807380776684276	8.150403032819974e-4	-3.7773359402027253	4.923648968057353	3.817706748264101	3.83166989195345	target	4	0	stabilized	1.3433007112918178	7.344552112696784	2.807380776684276	815	0	510	1	alpha
SHOT1_HUMAN	42	0.4751093653533234	-3.022190381950014e-5	-0.6708527372984978	1.0032575392721244	0.5130132788890985	1.8987059900702603	target	0	4	destabilized	1.3415047082475182	0.5130132788890985	0.4751093653533234	819	0	513	1	alpha
KIF7_HUMAN	37	2.205955323827478	-2.0079167971609075e-4	-1.1309347603882163	0.9883373781800249	0.29044173340637613	3.804004030414948	target	1	3	destabilized	1.3360542042028107	0.29044173340637613	2.205955323827478	825	0	518	1	alpha
THOP1_HUMAN	62	-0.9415137388478121	2.1492365267673568e-4	-1.2598111998912151	2.2658948708894844	1.774150748150857	3.7901451879995527	target	2	0	stabilized	1.3324043265398968	2.703498284260281	4.343280904760501	832	0	524	1	alpha
CATD_HUMAN	52	3.452968060252924	7.198000455065498	0.7919334973820684	0.5192328743382735	1.6138941976462848	2.364650397713903	target	4	0	stabilized	1.3284142055178356	2.3347611285565537	3.875572182071113	839	0	530	1	alpha
ACTZ_HUMAN	62	1.5887329002412482	-4.939796033776362e-4	-0.7473543078748859	0.9895670468148406	0.5182871650406753	2.29039332241297	target	1	3	destabilized	1.3231101817389974	0.37041947919165846	4.353001113229011	846	0	536	1	alpha
RS12_HUMAN	57	2.725588293279277	3.330062565051638e-4	-0.999329773492864	1.994995301363305	1.7412705678801044	3.727398842599216	target	1	0	stabilized	1.3157106291528207	1.7412705678801044	2.725588293279277	853	0	542	1	alpha
MTREX_HUMAN	62	1.5084959433743719	-0.00028732447299610793	-1.654524555630685	1.0653271228257097	0.09594117503107125	2.4531145773068253	target	0	4	destabilized	1.313339075214526	0.09594117503107125	3.3922440947635235	855	0	543	1	alpha
MTRR_HUMAN	47	-10.953808679054355	-6.331211088526892e-5	-1.3483190008111805	1.0047051226669097	0.12355572235741151	3.7102127323206204	target	0	1	destabilized	1.3110892152236002	0.12355572235741151	-10.953808679054355	858	0	545	1	alpha
VWA3B_HUMAN	47	-76.37586364199815	-0.0019184916665938555	-2.836365175331485	1.311955289874451	0.07331645659134083	1.9764115135059042	target	1	2	destabilized	1.3110264786214467	0.06251643380023776	0.015462988145180804	859	0	545	1	alpha
DDX58_HUMAN	37	-2.151048002233876	-3.316675451742189e-5	-1.210921919685485	1.0021134977450046	0.12952144558794218	2.646669781772253	target	0	2	destabilized	1.3055582450363687	0.12952144558794218	-2.151048002233876	864	0	549	1	alpha
SSRP1_HUMAN	52	2.930104672049013	-3.7355400390529835e-4	-0.7104577826106206	1.0008000642949153	0.4458354020917541	2.676748956678484	target	1	3	destabilized	1.3010431336042643	0.22841225462600567	3.2483374328661023	869	0	553	1	alpha
SEC13_HUMAN	57	2.912677986084693	5.022359489668942e-4	-2.825816737637534	3.835905464592404	3.506759869725481	2.0264352560910126	target	3	1	stabilized	1.3005089475913651	3.506759869725481	2.912677986084693	870	0	553	1	alpha
PRP19_HUMAN	67	4.019840205085736	8.223399052584265	0.8949866392752315	0.4488486029342027	1.7281782310656069	2.3456304770175582	target	3	0	stabilized	1.300266087431484	4.981533091716297	3.975930609717622	871	0	553	1	alpha
NRDC_HUMAN	37	3.4299988208852827	5.703087871960844e-4	-5.041038586895869	6.039957240115715	4.875042965863799	3.6672426949076398	target	2	0	stabilized	1.2994400704027407	4.875042965863799	3.4299988208852827	873	0	554	1	alpha
K1C9_HUMAN	57	1.8717430750288917	4.970766514154392e-4	-2.0164991547417106	3.0592673892124247	2.3526376277385044	3.6641609637383783	target	2	0	stabilized	1.2985993769982431	2.3526376277385044	3.5239821531581312	877	0	557	1	alpha
KINH_HUMAN	37	1.7800196649442404	1.690189468919458e-4	-3.4915981274373595	5.117065862851732	4.339761526262524	3.6600512535007477	target	1	0	stabilized	1.2974771510039531	4.339761526262524	1.7800196649442404	880	0	559	1	alpha
SYHM_HUMAN	47	3.5133408787773677	-6.6411944984896e-4	-1.785025133258332	1.124815078957572	0.10483396713105676	3.654051048125763	target	0	2	destabilized	1.2958364283359964	0.10483396713105676	3.5133408787773677	882	0	560	1	alpha
KLC2_HUMAN	47	4.065175568296652	-6.744671580174718	0.38261254740150286	0.8307305798624981	0.628001831052524	1.8523568677075688	target	0	3	destabilized	1.293429308357461	0.5119852735093808	4.083263050588625	890	0	567	1	alpha
HERC6_HUMAN	67	4.007443295507344	-5.9775825900118384	0.5822184162205729	0.8252748964086786	0.38950183486496387	2.2378496420647336	target	0	2	destabilized	1.2876269890595458	0.23233580207401797	3.1516167807439723	898	0	574	1	alpha
NP1L1_HUMAN	67	1.87220178328805	-0.0025049422837447465	-1.0870763219368018	1.0086054816986139	0.18316566345852617	1.7921670619781762	target	0	3	destabilized	1.2852732479915752	0.18316566345852617	3.4547111501751027	902	0	577	1	alpha
DDX5_HUMAN	37	2.893424938872795	5.764815870713083e-4	-3.749404555798672	4.7664227825945575	3.596426772404084	3.597189001966583	target	2	0	stabilized	1.2801527076662993	3.596426772404084	2.893424938872795	912	0	586	1	alpha
HPBP1_HUMAN	52	3.2173078732801135	4.6012761214504397e-4	-1.0605745474461745	2.0389690222538084	1.9355354018730533	1.9375154664833556	target	3	0	stabilized	1.2779416160005408	1.9355354018730533	3.1783096391808128	918	0	591	1	alpha
MYO6_HUMAN	42	-3.1096106007498614	-9.208554309728047e-6	-0.8207437316371202	1.004850096847856	0.3959117691229686	2.6272941447458478	target	0	5	destabilized	1.2716667080456128	0.17192194142925166	3.1139814561197956	931	0	603	1	alpha
DPP3_HUMAN	37	-5.989807136180544	5.654552430256996e-5	-2.900232916330858	3.905651595058457	3.092995989700782	3.5570822989036994	target	1	0	stabilized	1.2689406298658492	3.092995989700782	-5.989807136180544	935	0	606	1	alpha
RL13_HUMAN	57	3.9538848026927913	-6.74905871858414	0.6793042714313756	0.7476621412429542	0.4335551544415151	2.239955582744148	target	0	2	destabilized	1.26400995244104	0.4071600855258327	3.9712574572429182	939	0	609	1	alpha
PRDX5_HUMAN	42	1.77111401662681	-1.0621849417082738e-4	-0.5765354445307275	0.876984874652751	0.5036303356356487	3.5386588526778335	target	0	1	destabilized	1.2637478001861768	0.5036303356356487	1.77111401662681	940	0	609	1	alpha
JIP4_HUMAN	37	4.1249455652149996	2.9870211694119325e-4	-4.232047569683294	5.256788577936799	4.211827311172797	3.534468336803425	target	4	0	stabilized	1.2625628882646334	4.211827311172797	4.1249455652149996	946	0	614	1	alpha
SPF30_HUMAN	67	3.183828659870159	6.72191912093985e-5	-1.2607013978283814	2.261519979475092	2.0670442927834407	3.5255902552354286	target	2	0	stabilized	1.26004787054007	2.0670442927834407	4.039113269448182	950	0	617	1	alpha
PSIP1_HUMAN	37	2.9649936959681993	9.884037083886241e-4	-2.725278031044306	3.574760242216754	2.8986076044349764	2.8096461514672693	target	5	0	stabilized	1.2590063710453765	2.8986076044349764	2.9649936959681993	952	0	618	1	alpha
SYEP_HUMAN	67	2.76547025045329	6.0287129761632795e-5	-4.910237338637852	5.947371252392103	5.022554507010781	3.5142210017776545	target	1	0	stabilized	1.256817879585152	5.022554507010781	2.76547025045329	956	0	621	1	alpha
I2BP2_HUMAN	62	3.0492684230903455	4.6681857370015935e-4	-2.120427158797588	3.1262588528715467	2.579205820450466	3.5119759277161084	target	2	0	stabilized	1.2561788214544216	2.579205820450466	3.0492684230903455	958	0	622	1	alpha
SSBP_HUMAN	52	3.7323256306513763	3.50045575092032	0.8746473524734687	0.36144435866288316	1.8552407402690236	2.3763594600402893	target	3	1	stabilized	1.2545601767278098	2.5013766660658496	3.394890058216144	961	0	624	1	alpha
SMRC1_HUMAN	47	3.426535349564319	5.973083820055465e-6	-2.2519374702678117	3.2425425650361257	2.615192796930242	3.478536042719415	target	2	0	stabilized	1.2466115278973522	2.615192796930242	2.571194772049315	966	0	628	1	alpha
HCFC1_HUMAN	57	3.0429326075576917	0.0010108679482708613	-1.6336503006614822	2.6418176310317327	2.1148710478506376	3.4768903965677187	target	6	0	stabilized	1.246138330115227	3.0742694665929386	3.3328636901076854	967	0	628	1	alpha
HIF1N_HUMAN	42	1.3514484024397706	1.8994029497862674e-4	-1.2640338764840902	2.2640679756507365	2.0332237136617075	1.9524433060917736	target	3	0	stabilized	1.2421441589807354	2.0332237136617075	1.3514484024397706	974	0	634	1	alpha
ADSV_HUMAN	47	2.4405517170843645	-4.236137446265847e-4	-0.4625137113433827	1.0011475326268646	0.6506746863810632	2.384505008747207	target	1	2	destabilized	1.2408745329642137	0.5745525586349657	3.099832585074824	977	0	636	1	alpha
MIEN1_HUMAN	67	1.9367758350206683	1.4847356025826932e-4	-1.584762104829239	2.597526744535001	2.0423040560664822	3.458044140332758	target	1	0	stabilized	1.2407031518796763	2.0423040560664822	1.9367758350206683	978	0	636	1	alpha
FGFR1_HUMAN	42	4.016187403980487	7.18283182335776	0.715224650958911	0.4439923758213823	1.6409525949029633	3.4490324000704007	target	1	0	stabilized	1.2380937279582462	1.6409525949029633	4.016187403980487	981	0	638	1	alpha
CALL3_HUMAN	67	3.7093395781737404	3.6825714953819486	0.8010983953116979	0.41239772953858767	1.8103025506525745	2.39621322142247	target	3	1	stabilized	1.2350657735584774	6.869644758375199	4.281362976164051	989	0	645	1	alpha
PTMS_HUMAN	42	0.7534922371458723	-3.191339849364872e-4	-0.9038311654780804	1.0273505689620313	0.5172582538512936	2.5924309096070117	target	0	2	destabilized	1.2337537802252845	0.019409672094750745	0.7534922371458723	991	0	646	1	alpha
RL24_HUMAN	42	3.9145231707020103	-7.110811853532654	0.9894854445535592	0.6320400919999589	0.2289412221469004	2.264924941694154	target	0	2	destabilized	1.2329420176693686	0.2289412221469004	3.9145231707020103	992	0	646	1	alpha
MCM7_HUMAN	57	2.8715052366942984	1.8685903307237944e-4	-2.7456829433349474	3.7586958150146916	3.1430374501233778	3.4071644403752543	target	1	0	stabilized	1.2258804029603052	3.1430374501233778	2.8715052366942984	1005	0	658	1	alpha
MYG1_HUMAN	57	4.006940413821537	-6.167964905395781	0.5669298293223349	0.8585712401733466	0.5366606065274017	3.3852217702326945	target	0	2	destabilized	1.2194194197965307	0.5366606065274017	4.297417270515224	1013	0	665	1	alpha
TILB_HUMAN	37	-17.257911531082193	-1.9481554444317924e-6	-1.2566633532637776	1.031463759208198	0.2647919027033426	3.3822694920192564	target	0	1	destabilized	1.2185469315179902	0.2647919027033426	-17.257911531082193	1015	0	666	1	alpha
GDIA_HUMAN	57	3.1308165846510816	2.8255616308191895e-4	-0.9593594832900876	2.057180054392532	1.8505240385303532	3.37156881390855	target	2	1	stabilized	1.2153781594568618	2.946551106361123	3.1308165846510816	1024	0	674	1	alpha
IDH3B_HUMAN	37	2.4798742459790764	7.477975987060564e-4	-5.469700774575898	6.482261234368154	4.872726885499929	3.3590791683398686	target	1	0	stabilized	1.2116668793729135	4.872726885499929	2.4798742459790764	1029	0	678	1	alpha
PEG10_HUMAN	47	4.3010314936072565	-8.627830137144274	0.5376512116312855	0.8268732238506797	0.534844672989883	3.354203964271935	target	0	2	destabilized	1.2102144737976848	0.4088903725643006	4.3010314936072565	1032	0	680	1	alpha
TRI22_HUMAN	42	3.517719401995992	-9.55518578391666	0.9568016558329279	0.7221764169833281	0.22778165185329252	3.351053270136965	target	0	1	destabilized	1.2092747054169333	0.22778165185329252	3.517719401995992	1035	0	682	1	alpha
RPR1B_HUMAN	37	3.0769542657382694	6.238212776880853e-4	-1.1176035163716445	2.1054957226603204	1.8356905250612234	2.5216444618988607	target	2	0	stabilized	1.207409120958861	1.8736753570995022	3.0769542657382694	1037	0	683	1	alpha
2A5G_HUMAN	47	-3.0795933777061757	-1.0604926195307013e-4	-0.6900943183572905	1.0074327204615279	0.5275353207889257	2.91550533080369	target	0	2	destabilized	1.19899969946676	0.5275353207889257	0.3387363703778771	1059	0	704	1	alpha
COPG1_HUMAN	47	3.4154187035516266	-7.681446246386544	0.4504884379601688	0.8461268184045843	0.6657082093334985	2.7418933726993173	target	1	4	destabilized	1.1952356744823363	0.29757545851590006	3.1297988850628364	1066	0	710	1	alpha
CNN2_HUMAN	47	2.7565441133610897	4.495021098117799e-4	-0.7671642174837485	1.7830387692269911	1.523665905728333	3.301338499147972	target	2	0	stabilized	1.194327992039053	2.0384538352163215	2.7565441133610897	1068	0	711	1	alpha
ARHGB_HUMAN	47	1.012213841091754	0.09695108532515284	-1.276515843329119	2.2843457626096706	1.6319894205955483	2.157757583183355	target	3	2	stabilized	1.1866642151308517	2.3901067915099867	2.9619385859997496	1082	0	724	1	alpha
AMRP_HUMAN	37	2.881883680964504	9.364723994237731e-4	-2.8993422245406126	4.35950329476684	3.5680792401511305	3.2686959546040506	target	5	1	stabilized	1.1843911147300645	3.9693505091941126	2.881883680964504	1084	0	725	1	alpha
DX39A_HUMAN	57	1.570951581642431	5.00062005262843e-4	-4.8740585985145835	5.849050197144313	4.181070211749988	3.2439836706451044	target	4	0	stabilized	1.1768021025306035	4.181070211749988	4.332219602821807	1099	0	739	1	alpha
MAOM_HUMAN	52	4.276291000123455	12.587788561060329	0.6392185099972651	0.43073329929181564	1.6148564338115197	3.2242046655801415	target	2	0	stabilized	1.170686304509189	1.8320862490067575	4.1065161674141555	1112	0	751	1	alpha
F136A_HUMAN	37	2.9686853038399734	4.12252844138049e-4	-1.1058687054589846	2.111407596205534	2.013176813622146	1.8759151943680952	target	6	1	stabilized	1.1647404491583013	2.6249890251936705	2.9686853038399734	1128	0	766	1	alpha
P4HA2_HUMAN	57	1.8471931240435233	-3.4677374374129266e-4	-1.160860747654835	1.0153255664676584	0.154450537083225	2.069273760640641	target	0	2	destabilized	1.1554844566087468	0.1339886545648646	2.769159609370494	1154	0	791	1	alpha
GRB2_HUMAN	62	-0.48795461467827667	1.542558534051079e-4	-1.0103125582139019	2.0135306446624384	1.7524709854760168	1.9456203020315657	target	4	0	stabilized	1.153356225886081	2.424491270683637	3.2933719100451007	1156	0	792	1	alpha
K2C4_HUMAN	42	3.1575610823465703	-3.251383745658134e-4	-0.7215974821686351	1.0045558876761655	0.4890282575616562	3.154088436210745	target	1	3	destabilized	1.1486995275297243	0.4890282575616562	3.1575610823465703	1165	0	800	1	alpha
XRN2_HUMAN	57	3.1268319797912567	-1.6157953242084753e-4	-0.7065660362623192	1.0028243482715709	0.43488549869679316	3.152637327095458	target	0	4	destabilized	1.1482393492390057	0.4215071013455954	3.212692576121163	1170	0	804	1	alpha
SF3A1_HUMAN	67	3.98736496509065	6.652045340955702	0.7569410609109497	0.44266545946752744	1.5871071493398536	3.1453738209749607	target	5	0	stabilized	1.1459327450840946	2.9675230932936523	4.235031770508789	1181	0	814	1	alpha
BGLR_HUMAN	62	1.270524786740404	-5.029992723547016e-4	-1.2224095588536275	1.029195715602794	0.31617195445634805	3.142492364475456	target	0	1	destabilized	1.145016231718122	0.31617195445634805	1.270524786740404	1183	0	815	1	alpha
PCP_HUMAN	62	-0.4920642493668166	-1.4328674671108384e-4	-0.8389958903051837	0.9986015398493434	0.38550154397645403	3.1324000500779796	target	0	1	destabilized	1.1417994998817416	0.38550154397645403	-0.4920642493668166	1187	0	818	1	alpha
RANDOM10898	37	2.685872415907546	3.067560228236899e-4	-2.876467781516412	4.069749298543877	3.4287503931173293	3.128562079826109	target	3	0	stabilized	1.1405734995792416	3.4287503931173293	2.685872415907546	1189	0	819	1	alpha
RL18_HUMAN	52	3.230810041782393	-8.858556965476472	6.569893421807141	0.5446274464734188	0.12500619510019204	3.0761091779342005	target	0	3	destabilized	1.123665544490177	0.08104715915287172	3.3868316508894556	1219	0	848	1	alpha
RL15_HUMAN	37	3.633076383770623	-13.481595574550555	1.0142994812620776	0.5435686762463644	0.09100269315645616	1.9578515671372447	target	0	4	destabilized	1.120534773903631	0.06649074166136458	3.633076383770623	1227	0	855	1	alpha
THTM_HUMAN	42	-8.0060879825757	4.124218757747211e-5	-1.0688861540376164	2.0746682962987637	1.7409267096759886	2.725209576761872	target	2	0	stabilized	1.1198063919145023	2.814607195133235	0.8790583965881642	1229	0	856	1	alpha
RNPS1_HUMAN	52	3.113745598666089	8.525710174887238e-4	-1.2387456272605732	2.35837142492056	2.03549918290101	3.05798388400402	target	2	0	stabilized	1.1177558373831142	2.03549918290101	3.384871274616581	1232	0	858	1	alpha
STK26_HUMAN	62	-1.2232891577283178	-4.4149909898468976e-5	-0.9982457186758406	1.0132617730934093	0.26778633783134764	3.052882566020916	target	0	1	destabilized	1.1160862479035114	0.26778633783134764	-1.2232891577283178	1239	0	864	1	alpha
LC7L2_HUMAN	67	3.4375416723549543	8.71162485521467	1.1809068710501256	0.2720978471240244	1.9622333000979661	2.4082278415660765	target	6	0	stabilized	1.114639476485903	6.878734994677595	3.293069221388642	1244	0	868	1	alpha
KS6A1_HUMAN	42	-0.48284394165943945	-2.8690232213608404e-4	-1.0285994031272279	1.0192303565169478	0.40607086241693485	3.0461638905399644	target	0	1	destabilized	1.113883058192945	0.40607086241693485	-0.48284394165943945	1249	0	872	1	alpha
ZRAB2_HUMAN	37	3.0804072504492663	-8.962381053126396e-4	-0.7780960767125036	0.9742615687648387	0.40329161908565175	3.0380448149143495	target	0	2	destabilized	1.111214155517824	0.40329161908565175	3.0804072504492663	1258	0	880	1	alpha
U520_HUMAN	37	2.9772228732250565	1.9085306145459307e-4	-4.85974866978737	5.865606508366328	4.703597338242785	3.0304835338423657	target	2	0	stabilized	1.108722188915598	4.703597338242785	2.9772228732250565	1270	0	891	1	alpha
TCTP_HUMAN	42	4.297535065214336	-10.73340819608756	0.5333598130468754	0.7997928038079006	0.5526437054281282	3.0263773610263	target	0	1	destabilized	1.1073663138125034	0.5526437054281282	4.297535065214336	1273	0	893	1	alpha
SMD2_HUMAN	62	3.0328603487933234	4.910405416981488e-4	-1.7402872195300207	2.7381111893273284	2.2807053435049833	2.748817206426412	target	5	0	stabilized	1.1066143680324074	3.184501820598003	3.3139095212204714	1275	0	894	1	alpha
RM12_HUMAN	62	3.0463602631697198	6.91652739486052e-4	-2.6431000787678114	3.7862980808134257	3.439863121625879	2.0018766807361597	target	7	0	stabilized	1.1025485602380658	3.440511458528732	4.305412673319524	1284	0	902	1	alpha
RAB4A_HUMAN	37	2.5606837213317393	-1.802998118082437e-4	-1.0049772811817421	1.0215649389186487	0.37836764750830704	2.5663773057002857	target	0	3	destabilized	1.094110203542046	0.3516482248034442	2.5606837213317393	1299	0	916	1	alpha
K2C73_HUMAN	57	3.485164626247266	-10.369113556254964	1.0250423085005749	0.6363440490910427	0.17370160526051898	2.98510684785492	target	1	3	destabilized	1.0936355411302137	0.17370160526051898	2.865025777110267	1302	0	918	1	alpha
RPIA_HUMAN	42	-11.346421232771116	1.4471990251706156e-5	-2.222409944282549	3.2344813860581527	2.6383579084450335	2.9792112752156705	target	4	0	stabilized	1.0916585927388809	4.098058389863895	3.303786854572843	1305	0	920	1	alpha
RS8_HUMAN	52	3.488958505921467	-8.902662251365765	1.305916840737285	0.5079010090323051	0.1022416045477558	2.96308679442889	target	0	4	destabilized	1.0862315609159947	0.1022416045477558	3.4008462985239296	1323	0	937	1	alpha
MINK1_HUMAN	47	1.3953380407792353	3.9820309870479187e-4	-1.919709913956062	2.9448052104537474	2.2693676881122102	2.143186560182677	target	5	0	stabilized	1.0837814415982823	7.9436269293319715	3.337710614286451	1329	0	942	1	alpha
FYV1_HUMAN	62	1.5086487665962094	-2.5081745799153534e-4	-1.1592168231029607	0.9997304103225512	0.17213758624328074	2.9468759201498465	target	0	4	destabilized	1.0807455990856076	0.168147726062774	3.700978704335637	1333	0	945	1	alpha
COPE_HUMAN	37	3.0825189844858447	-7.335438668910831e-4	-0.6972371594275966	1.0170415651051945	0.5730793439510686	1.8247549476221487	target	0	4	destabilized	1.0762108214793666	0.33165188709704824	3.0825189844858447	1344	0	955	1	alpha
RAB21_HUMAN	37	4.115924297242409	8.676842669032924	0.5497112192421928	0.5476686268125525	1.5403635184508386	2.923167255194535	target	2	0	stabilized	1.0726677048802256	1.5403635184508386	4.115924297242409	1351	0	961	1	alpha
DNJA1_HUMAN	57	1.3264619756906026	0.014116309184091624	-4.75838587763714	5.759508814403602	4.055671357098398	2.922890813256219	target	2	0	stabilized	1.0725731310886946	4.055671357098398	1.3264619756906026	1352	0	961	1	alpha
DHB4_HUMAN	62	2.8138249896035803	6.723214741124045e-4	-1.764022440160471	2.7366112061975842	2.1298801832989374	2.3834093610440656	target	4	0	stabilized	1.0687808722652468	3.035529041316078	3.704732077608909	1360	0	968	1	alpha
PEPL_HUMAN	47	4.320906133124484	-10.711884498970191	0.5994973893670389	0.7943741077133332	0.4457803600296191	2.9069682267233006	target	0	3	destabilized	1.0671106915972617	0.23558482243946488	3.2777106522734316	1363	0	970	1	alpha
WIPI3_HUMAN	37	2.430268607414828	-7.784784199868099e-4	-0.6804191039544161	0.903664918820812	0.4606123514574212	2.9059848629284843	target	0	2	destabilized	1.0667723562317322	0.4606123514574212	2.430268607414828	1364	0	970	1	alpha
CP135_HUMAN	37	-85.67541035295797	0.004026663029269411	-3.7336686936464547	4.7342791014440335	2.9543714448407457	2.897129345086647	target	1	0	stabilized	1.0637203657320655	2.9543714448407457	-85.67541035295797	1374	0	979	1	alpha
PLD5_HUMAN	37	0.14372925561533964	-0.10473802318647106	-1.1849024903455474	1.001855609786477	0.5376274910967805	2.881000799427326	target	0	3	destabilized	1.0581377335849373	0.41007555688767355	0.14372925561533964	1392	0	996	1	alpha
ANT3_HUMAN	37	3.8577643361674774	-3.9933541040024017e-4	-1.0705328544407942	0.9207564787906798	0.2925444614091026	2.872209213099793	target	0	2	destabilized	1.057568089030524	0.2925444614091026	3.8577643361674774	1393	0	996	1	alpha
HNRPL_HUMAN	47	2.953703570166182	8.533383674040292e-4	-2.1534443366979765	3.187975636741978	2.588465384527777	2.8732360592685184	target	4	0	stabilized	1.0554389413515475	21.301554035935435	2.9487586139808757	1396	0	998	1	alpha
RL6_HUMAN	52	3.5093254861366385	-9.267452629730052	0.9808838386313943	0.5204175204699271	0.04929487203971964	1.7627482848350164	target	0	3	destabilized	1.0476483837996629	0.0480320052190794	3.428104533703643	1413	0	1014	1	alpha
TXD12_HUMAN	42	2.726495498863464	7.727377779408019e-5	-0.8386035531863656	1.8417028687534314	1.56167009481781	2.8311810016154815	target	7	0	stabilized	1.040693939661909	2.2562493824843437	3.344168789765291	1431	0	1031	1	alpha
FARP1_HUMAN	37	4.06958602723379	-6.679929149996577	0.42374821149532826	0.8563084738497054	0.6216578149856711	2.826625172191153	target	1	4	destabilized	1.0390834813785985	0.4740399857749589	4.06958602723379	1435	0	1034	1	alpha
H1BP3_HUMAN	42	2.784472369446367	-6.855117195101113e-4	-0.6707350579812266	1.0007055362118566	0.5792545673382299	2.808905515690759	target	0	2	destabilized	1.0327949112768497	0.5381545925633572	2.784472369446367	1452	0	1050	1	alpha
RS18_HUMAN	42	3.210572594049103	-6.818892376641096	5.045660184834913	0.5425263032449151	0.14105893141585113	1.9547560130003296	target	0	2	destabilized	1.0327488951084733	0.14105893141585113	3.210572594049103	1454	0	1051	1	alpha
NLE1_HUMAN	52	3.8392720789194077	4.7234041352356195	0.6198667637773809	0.618675443741046	1.6017156508833714	1.7153727663628844	target	5	0	stabilized	1.0310709541967897	1.7643818664671551	4.623464667953586	1460	0	1056	1	alpha
SRSF5_HUMAN	67	3.463951084216958	6.720691554616274	1.3557996919468993	0.09437624388775973	2.273378735291782	1.7671643237240542	target	4	0	stabilized	1.02647207896018	2.703184358471044	3.887365255703828	1470	0	1065	1	alpha
TEBP_HUMAN	57	2.878538045769919	-3.7899398284573735e-4	-0.5565188270670594	1.0008051254532773	0.5832057193119368	2.790510627780437	target	0	4	destabilized	1.0262245997968613	0.38617074050862404	3.107850247133695	1472	0	1066	1	alpha
MSH6_HUMAN	47	3.9569923786359515	-6.659264371639296	0.9292890896013264	0.6543178353667516	0.22560918624640888	2.1583376714415077	target	0	2	destabilized	1.0255632565266366	0.22560918624640888	3.2469312484969106	1474	0	1067	1	alpha
VPS36_HUMAN	57	-0.9178541639563816	1.4472622701688456e-4	-1.1913912404368163	2.197946391253064	1.8759345312197495	2.785801759888628	target	2	0	stabilized	1.0245357170070486	5.052791775448937	4.041915455234349	1478	0	1070	1	alpha
PDIA6_HUMAN	67	1.7419833331798389	-0.06744451496305948	-0.7937770773583628	0.9999599155885218	0.5148294249642317	2.7853506024200847	target	0	1	destabilized	1.0243737550142005	0.5148294249642317	1.7419833331798389	1480	0	1071	1	alpha
CDKL5_HUMAN	42	0.2377243405581786	2.2303942693447618e-4	-0.9485478414392592	1.9533175704780452	1.6867363999741314	2.0701248093251094	target	4	0	stabilized	1.020254342335522	2.144610015022472	0.2377243405581786	1490	0	1080	1	alpha
RAE1L_HUMAN	47	-0.8111773852179002	1.4642114374042135e-4	-1.6360147378948513	2.648334418571201	2.1393328211320384	2.773631093368848	target	2	0	stabilized	1.020157325799177	2.1393328211320384	3.1598117231764506	1491	0	1080	1	alpha
AP2B1_HUMAN	47	3.155339331441312	3.0034101372134923e-4	-0.9860343848212587	1.987550117556644	1.7211619949275332	2.7694271812801166	target	3	0	stabilized	1.0186405050527783	2.2687643077042288	3.805405575154103	1496	0	1084	1	alpha
HNRPC_HUMAN	67	3.3974642492793636	6.779061254690972	0.9828435720627715	0.38352100183900034	1.7181718841743956	2.077105819143047	target	4	0	stabilized	1.0179511323384958	5.592687112386169	3.162682694532327	1500	0	1087	1	alpha
DC1L1_HUMAN	57	2.187778573866504	-5.308035790346841e-4	-0.8369426414139159	1.0015786696521516	0.4222880539512019	2.7618435490269344	target	0	3	destabilized	1.0158984092940357	0.4222880539512019	3.8918526218151146	1508	0	1094	1	alpha
SNX9_HUMAN	52	2.576557581627541	-4.0029040582538223e-4	-0.6681292820321767	1.0118188731054867	0.5988577875440133	2.759461654089562	target	0	1	destabilized	1.0150356078376737	0.5988577875440133	2.576557581627541	1512	0	1097	1	alpha
NASP_HUMAN	42	3.079599314300158	-0.0010218373626021352	-0.5710717044330383	1.0017742030625238	0.6063680649030374	2.759053823953434	target	0	1	destabilized	1.0148878035455617	0.6063680649030374	3.079599314300158	1513	0	1097	1	alpha
CFA58_HUMAN	67	1.7694913237600494	-1.0131722599591676e-4	-0.8309587773795857	0.8910294944238061	0.2559296692911757	2.7575613722017622	target	0	4	destabilized	1.0143467283626766	0.18842803658874732	3.213765350614639	1514	0	1097	1	alpha
PBDC1_HUMAN	37	2.689213276769943	2.8288597729177536e-4	-1.1454967382259706	2.145068450448056	1.8647734237736957	2.7565915433201833	target	1	0	stabilized	1.0139949684799034	1.8647734237736957	2.689213276769943	1516	0	1098	1	alpha
HNRPK_HUMAN	37	3.199919824850337	6.471156328155974e-4	-1.0967666867607149	2.122618395865104	1.9079804255774715	2.716093843912819	target	1	0	stabilized	0.9991947613502041	1.9079804255774715	3.199919824850337	1557	0	1138	1	alpha
NUP54_HUMAN	37	2.878007876036537	9.063949458629739e-4	-4.199652317605426	5.190799809382322	3.804314643398246	2.51363827008457	target	4	0	stabilized	0.9975053026519857	3.804314643398246	2.878007876036537	1563	0	1143	1	alpha
CALB1_HUMAN	62	3.8991622053283237	-7.418609861263832	0.6245591752820532	0.7864866321182653	0.5280928223568144	2.70785213172756	target	0	2	destabilized	0.9961557493226637	0.5198553084774895	3.8991622053283237	1567	0	1146	1	alpha
IF4A2_HUMAN	52	2.1103245813685354	5.37485779061767e-4	-2.3983875146943427	3.4190959871099453	2.619792068431851	2.7076158080613832	target	4	0	stabilized	0.9960684720387967	5.28449158243047	1.1351537367703153	1568	0	1146	1	alpha
AP1B1_HUMAN	57	1.388734855822793	-2.0264090339314412e-4	-0.8570518382223457	1.0130563143222056	0.4408398090870844	2.7075370569829476	target	0	2	destabilized	0.9960393865889844	0.4408398090870844	3.141875966200354	1569	0	1146	1	alpha
RL4_HUMAN	52	3.452134407425642	-9.477080440409239	1.180488522665034	0.5546954968046632	0.16579991612011957	2.688515893846484	target	0	4	destabilized	0.9889893290397749	0.15374119802959482	3.5649312487389055	1591	0	1167	1	alpha
SPRY4_HUMAN	37	3.4604137947526925	3.0351010503457126e-4	-1.9666069476838992	2.969679522349298	2.614533161849721	2.6779015421562637	target	1	0	stabilized	0.9850334811548271	2.614533161849721	3.4604137947526925	1606	0	1181	1	alpha
DHX15_HUMAN	47	2.8712587126972333	-6.916744034625382e-4	-0.5641771689940192	1.0032604086374606	0.6123807217129708	2.661786482550731	target	1	2	destabilized	0.97899750734603	0.35210578237142376	2.8712587126972333	1626	0	1200	1	alpha
RBM42_HUMAN	67	-76.39657185847553	4.5682384932896775e-4	-4.889543697292108	5.890166634844078	4.960271393283534	2.6528508193967983	target	2	0	stabilized	0.9756348426649734	4.960271393283534	3.337662196843025	1636	0	1209	1	alpha
H90B2_HUMAN	57	3.438899189598055	7.420110090767923	1.1120749144665338	0.29594143577952453	2.098540747457377	1.9837625819628892	target	3	1	stabilized	0.9741632213535314	3.6227064240406732	4.3360617889944635	1638	0	1210	1	alpha
NAA11_HUMAN	42	3.221817382986211	-0.001033151822664948	-1.2018559570621403	1.049240144571635	0.19362361908667575	2.6480504861163627	target	0	1	destabilized	0.973823703646926	0.19362361908667575	3.221817382986211	1641	0	1212	1	alpha
TRM1_HUMAN	57	2.8477350062835622	-1.720769783276027e-4	-0.9391679165115335	1.0200872826460656	0.35290863942292405	2.6097927014255085	target	1	4	destabilized	0.9592707934391058	0.35290863942292405	4.34838996891237	1684	0	1254	1	alpha
TBB2B_HUMAN	47	3.1075881252831885	-9.458781179606501e-4	-0.6486232676868096	1.000162997291225	0.5083101319091562	2.005295009448055	target	0	3	destabilized	0.9583344427647548	0.5083101319091562	3.1075881252831885	1687	0	1256	1	alpha
ACL6A_HUMAN	57	-0.6941524172339004	0.033020101510655084	-2.8597099800488524	3.860750464811443	2.549166189913972	2.6063234783922034	target	3	0	stabilized	0.9579405993156428	3.663510914068146	3.989107419534452	1691	0	1259	1	alpha
ATIF1_HUMAN	67	0.6765519126052342	1.1503241180539633e-4	-2.665135300303234	3.6797941561519307	3.061136007195224	2.6012941435267907	target	1	0	stabilized	0.9560090687025392	3.061136007195224	0.6765519126052342	1694	0	1261	1	alpha
IFT25_HUMAN	37	-0.3895948378581927	-2.521713338204747e-4	-0.8913500121663974	1.0240120700062243	0.48544427350041924	2.599714204437557	target	0	3	destabilized	0.9554015176154694	0.4573201523707923	3.315003363186045	1696	0	1262	1	alpha
AL1B1_HUMAN	52	4.295719648006452	12.199282904881722	0.4929851533119777	0.7074354397177659	1.5089585737589246	2.5876289460410846	target	2	0	stabilized	0.9507419915685807	4.032274138849361	3.2121704334752055	1706	0	1271	1	alpha
DIAP1_HUMAN	57	2.839502165516612	-5.135558228035488e-4	-0.8664138036626737	1.001501250021104	0.25950462239853683	2.5734176257060417	target	1	3	destabilized	0.9452348309354898	0.23132618197789642	3.964225964237887	1722	0	1286	1	alpha
PP4R2_HUMAN	57	3.475699715716234	-8.662329195484185	0.6099339322495388	0.7777058381749772	0.4581053915122091	2.5724885518644878	target	0	3	destabilized	0.9448737385177156	0.30667930980917923	3.4044345343813673	1724	0	1287	1	alpha
CSN4_HUMAN	42	2.421889492402341	-5.864434461192848e-4	-0.5432754060440073	1.0096303989579485	0.6412191781494982	2.565355141780259	target	0	1	destabilized	0.942096925872879	0.6412191781494982	2.421889492402341	1732	0	1294	1	alpha
HMCS2_HUMAN	67	2.870274052941551	6.645615951922512e-4	-2.8395000296595585	3.8729730848861443	3.0402772335776143	2.554660941496696	target	3	0	stabilized	0.9379195109345366	3.400980101378202	2.7053661813701733	1746	0	1307	1	alpha
AIP_HUMAN	52	2.1374014786790334	2.184948095273188e-4	-2.3246110276077325	3.316241987187062	2.7764792782287047	2.5401436004049187	target	4	0	stabilized	0.9322206150248565	2.8926271494508966	3.35084072252411	1769	0	1329	1	alpha
NIT1_HUMAN	37	2.7713671400795263	-7.916117421143791e-4	-1.138997232559421	0.9728865706279546	0.3118209085469707	2.5276061224716324	target	0	3	destabilized	0.9272726581612751	0.3118209085469707	2.7713671400795263	1789	0	1348	1	alpha
K2C8_HUMAN	52	4.345289527247933	12.768767280943074	0.7412450592656256	0.47710371836141585	1.7732792723036648	2.518474868635779	target	1	0	stabilized	0.9236535074504966	1.7732792723036648	4.345289527247933	1792	0	1350	1	alpha
PCH2_HUMAN	47	3.970610267819725	-6.202103492431845	0.4501258062937572	0.8395189988809506	0.6520701738687791	2.510134542893966	target	0	1	destabilized	0.9203363544537166	0.6520701738687791	3.970610267819725	1801	0	1358	1	alpha
SERA_HUMAN	42	3.7259187708735744	-5.137578212633308	0.4263997225300279	0.8688743424102955	0.6424363659290565	2.500905226583597	target	0	1	destabilized	0.9166527569686007	0.6424363659290565	3.7259187708735744	1814	0	1370	1	alpha
PPM1G_HUMAN	37	2.824246006888167	4.7462389489178836e-4	-3.988005624939462	4.943007079168772	4.046549505676126	2.3568298815966786	target	2	1	stabilized	0.914185822041373	4.046549505676126	2.824246006888167	1820	0	1375	1	alpha
FIP1_HUMAN	47	-2.206481046053214	6.777257933521056e-5	-5.778513956685354	6.792683058168939	5.563103559489768	2.491563897356769	target	2	0	stabilized	0.9129105845500478	5.563103559489768	4.293092174158499	1824	0	1378	1	alpha
GMFG_HUMAN	42	2.9605039397770883	-7.908167646229516e-4	-1.4150108375382504	1.0397631077364495	0.14569659156333112	2.4798344977522566	target	0	1	destabilized	0.9081918231727106	0.14569659156333112	2.9605039397770883	1834	0	1387	1	alpha
PFD4_HUMAN	37	0.67664417910657	-1.9375789033624743e-4	-0.7510428332001486	1.0242724866338733	0.49723206580192314	1.6482488347688262	target	0	4	destabilized	0.9061783143870801	0.1866808142259349	0.67664417910657	1844	0	1396	1	alpha
PGK2_HUMAN	47	3.186719462157509	-5.902509704990957	2.1147523584831394	0.935163367007578	0.6555512640606357	1.5829585359528493	target	0	2	destabilized	0.9020035245779159	0.47134616625339887	3.186719462157509	1856	0	1407	1	alpha
LONM_HUMAN	62	2.687528257846759	5.789260080063938e-4	-1.7159177226190285	2.7356215103856654	2.209321457123598	2.4608911699761955	target	3	0	stabilized	0.9005235485603983	2.209321457123598	3.5638024353479425	1859	0	1409	1	alpha
DCXR_HUMAN	42	1.8992979496083453	2.9586386044058624e-4	-1.207989850585202	2.209154860068272	1.883069225495616	2.4499708062285173	target	5	0	stabilized	0.8960761086605467	3.6454438047529965	3.180636057497602	1874	0	1423	1	alpha
VPS4B_HUMAN	52	0.7024885268405369	0.04476660569905605	-2.621884399365718	3.642173179612859	2.585641430311328	2.436801815650431	target	1	0	stabilized	0.8906864482546872	2.585641430311328	0.7024885268405369	1898	0	1446	1	alpha
PRI1_HUMAN	47	3.8586214056056893	-6.2613194511869	0.594937930617482	0.7955355798094301	0.46959854792108896	2.4159428438331934	target	0	1	destabilized	0.8820896224389182	0.46959854792108896	3.8586214056056893	1924	0	1471	1	alpha
COPB_HUMAN	52	3.4529100772491716	-9.871823917672945	0.5751925655098424	0.7407424323767224	0.5439087076577749	2.085600677136892	target	0	3	destabilized	0.8784651309912457	0.5439087076577749	3.3286777122164337	1935	0	1481	1	alpha
HIKES_HUMAN	37	-5.893170933168867	2.1514837101523103e-5	-4.497101992329779	5.4967606304437036	4.408699215865788	2.4066887914496538	target	3	0	stabilized	0.8782518573174934	4.408699215865788	3.3913980264714687	1936	0	1481	1	alpha
EFHD1_HUMAN	52	2.879142443367313	-0.012643316521949206	-0.6692589491516945	1.0006259325150502	0.557469751827755	1.531245349005228	target	1	5	destabilized	0.8751671240970051	0.3335875170900703	1.8919693867936833	1946	0	1490	1	alpha
CARF_HUMAN	57	2.7163296401707395	5.632417668065431e-4	-1.921648620228198	2.8940441154669196	2.409511493413807	2.392760974898737	target	5	0	stabilized	0.872447918813581	3.0860975990183652	3.4746867376291055	1957	0	1500	1	alpha
ALDOB_HUMAN	37	3.1874730342314797	0.0012098205753699614	-1.197174203909607	2.1976298114822304	1.9471503111175879	2.3890807280838584	target	4	0	stabilized	0.8709086593524311	3.2634952331061347	3.1874730342314797	1966	0	1508	1	alpha
H4_HUMAN	52	1.334724245047772	1.8763415082479197e-4	-2.2427573869079596	3.2208473862149347	2.69506615987138	2.3858152222601583	target	5	0	stabilized	0.8695408782042099	4.4684605135038	3.2074930187774036	1969	0	1510	1	alpha
EIF3G_HUMAN	52	1.2613706133085627	0.13638300222054442	-3.9048711742171847	4.913416026316523	2.8701223621280145	2.3834969088738305	target	3	0	stabilized	0.8685686987765785	2.8701223621280145	1.2613706133085627	1976	0	1516	1	alpha
PPIL4_HUMAN	42	2.09608552339197	1.2133414846013661e-4	-1.7318366057568597	2.7217578976202255	2.3081531900241306	2.367882650415712	target	1	0	stabilized	0.861996159381516	2.3081531900241306	2.09608552339197	1995	0	1534	1	alpha
TBCE_HUMAN	42	3.2340603920851754	-1.6984432600877718e-4	-0.9478068015506106	1.0167554973720243	0.42768511219294053	2.3602486991688494	target	0	2	destabilized	0.8587669944890806	0.42768511219294053	3.2340603920851754	2013	0	1551	1	alpha
GORS2_HUMAN	47	-4.237623563897874	4.196730304658649e-5	-2.118018002449374	3.1222301871945857	2.67994899549281	2.3568923462540745	target	2	0	stabilized	0.857343948856628	2.67994899549281	3.3155141036733684	2021	0	1558	1	alpha
PSA7_HUMAN	37	2.9406371947919214	-5.760596616218368e-4	-0.5237492444575444	0.9691026485445626	0.5740576729072691	2.356138297160633	target	0	1	destabilized	0.8570239640498545	0.5740576729072691	2.9406371947919214	2023	0	1559	1	alpha
HTRA2_HUMAN	37	4.067278064820691	9.307526507811922	0.7237537143785902	0.5642319942229299	1.6445409899821908	2.3450867189644455	target	7	0	stabilized	0.8523223815831192	3.025714458510687	4.067278064820691	2038	0	1573	1	alpha
PDCD5_HUMAN	52	3.1263213411898607	5.376615887103754e-4	-0.6765449860572215	1.6787992612526315	1.5430899246586822	2.219915224506129	target	2	0	stabilized	0.8487428092784101	1.5701730597452215	3.450825394767333	2051	0	1585	1	alpha
CALM1_HUMAN	37	3.1432669372149564	-9.007706157810369e-4	-0.49841504466976705	0.9989116026184117	0.5902645039547016	2.334317592386466	target	0	1	destabilized	0.8477195967524052	0.5902645039547016	3.1432669372149564	2056	0	1589	1	alpha
GLRA3_HUMAN	52	-1.3462434563655223	1.0660957845215164e-4	-2.3999824537418872	3.5106206002537643	2.873513707145904	1.7320550796282865	target	3	0	stabilized	0.8411090691000349	2.873513707145904	3.180763847886554	2086	0	1618	1	alpha
CAD17_HUMAN	52	3.4301561977802595	2.8128526658546485e-4	-2.0229258563349193	3.0293505270278587	2.832296211869174	2.3079585299115903	target	3	0	stabilized	0.836363380508513	6.934827239627716	3.6407292879146893	2098	0	1629	1	alpha
SF3A3_HUMAN	67	3.3912158063245927	7.157467658831928	1.0422529217206524	0.3469085836835641	1.8251130179455501	1.6373314795399416	target	3	0	stabilized	0.83284484879835885	2.034352545895968	4.3081526689756275	2110	0	1640	1	alpha
NAA50_HUMAN	47	0.9908761107127302	1.9275344803129182e-4	-2.3476900484584196	3.3474264097633846	2.659444861973605	2.2926943048727586	target	1	0	stabilized	0.8297276783170316	2.659444861973605	0.9908761107127302	2120	0	1649	1	alpha
IF2G_HUMAN	62	3.3857869056276613	-7.660237905004988	0.6789913412379834	0.7779901244052408	0.5558098019073985	2.2903615153967043	target	0	2	destabilized	0.8287096720919275	0.4740895016484295	3.3857869056276613	2122	0	1650	1	alpha
CALU_HUMAN	52	3.4853044552578196	5.942880669316103	0.6228747064676093	0.6333296215920613	1.5882127201012268	1.8121250078499127	target	4	0	stabilized	0.8276373369768534	1.7950387466985704	3.9957378810303026	2129	0	1656	1	alpha
XRN1_HUMAN	52	1.479772534651175	0.0381979983371421	-2.647501335220636	3.6613036959236216	2.7109156847129188	2.108274061324001	target	4	0	stabilized	0.824218472125153	3.874206467447139	1.1051376372449413	2142	0	1668	1	alpha
2ABD_HUMAN	42	-2.4503498194855085	4.52919462927991e-5	-1.967065888537093	2.9962335022887623	2.5535625595153366	2.2691536186651287	target	1	0	stabilized	0.8194069067519234	2.5535625595153366	-2.4503498194855085	2164	0	1689	1	alpha
HEM6_HUMAN	52	3.380569485199552	7.743943068220031	0.9459363324922561	0.2907006143920361	1.653914115119769	2.260634838229441	target	1	0	stabilized	0.8156456757100846	1.653914115119769	3.380569485199552	2175	0	1699	1	alpha
RS16_HUMAN	42	3.7501007838880485	-6.074067616306454	0.9499592378336928	0.5956332476728808	0.16166224970986132	1.96713668537082	target	0	2	destabilized	0.8144159650342331	0.16166224970986132	3.7501007838880485	2178	0	1701	1	alpha
K1C28_HUMAN	47	3.4260076044584915	-8.451486995232026	0.6699976988546481	0.7453577328732521	0.48632616315683447	2.2464524417405363	target	0	4	destabilized	0.8093522793687749	0.16959989715083829	3.2544753152597514	2195	0	1717	1	alpha
OSBL3_HUMAN	62	2.8037499548673646	4.394330239601322e-4	-3.8025787874851025	4.819319110152593	3.6949409618831766	2.246090999265307	target	4	0	stabilized	0.8091913716421139	3.6949409618831766	4.345303574594215	2196	0	1717	1	alpha
STAT3_HUMAN	47	4.0031077964798145	-6.969037568696658	0.654779874409924	0.7617980942591198	0.47865804246659654	2.2435616408713517	target	0	1	destabilized	0.8080646213724194	0.47865804246659654	4.0031077964798145	2198	0	1718	1	alpha
FUCO_HUMAN	57	-2.1684722852524234	8.835660875486807e-5	-2.2209633055257822	3.2326791575926235	2.7810173704351873	2.239942857101197	target	5	0	stabilized	0.8064503553188772	2.7810173704351873	3.4048542259603547	2205	0	1724	1	alpha
SRRM1_HUMAN	67	3.8987181862280798	5.810251623652079	0.6053910925922235	0.620143277754486	1.6088132604365601	1.707866210907182	target	7	0	stabilized	0.8027280528400269	2.9375511770239657	3.2313241437735383	2221	0	1739	1	alpha
ICAL_HUMAN	37	2.925052716101878	-4.513029836758848e-4	-0.6137312802454546	0.7671715930758155	0.2807732778989951	2.0857616585707213	target	0	7	destabilized	0.7883098993322177	0.2807732778989951	2.925052716101878	2277	0	1794	1	alpha
TBB2A_HUMAN	52	3.9092895266536676	-5.627102569177983	0.5160695859525769	0.8192252183170506	0.48648915409899274	2.1952684577282984	target	0	5	destabilized	0.7863043432528214	0.24096057987190014	3.893887952458333	2290	0	1806	1	alpha
FSTL1_HUMAN	67	3.0001468621818788	7.430057412390192e-4	-1.7081251248844558	2.721137895867485	2.281228829691161	2.194697577081369	target	1	0	stabilized	0.7860442589398128	2.281228829691161	3.0001468621818788	2295	0	1810	1	alpha
H1T_HUMAN	57	4.043877299513494	7.996571636286286	0.8814420344618025	0.43083990005037054	1.8308901312236985	2.1878372504873407	target	4	0	stabilized	0.7829134990177605	5.757277872694005	4.270967244363469	2310	0	1824	1	alpha
PNPO_HUMAN	42	2.9700008763980645	-9.226250161758922e-4	-0.5910267801545349	0.9969778248242683	0.5321165338040288	2.1871756508579705	target	0	3	destabilized	0.7826110543624728	0.4083024124163988	2.9700008763980645	2312	0	1825	1	alpha
RB11B_HUMAN	57	4.015300766284163	-5.692285873385573	0.48275131604756294	0.8755251925393517	0.5163141160888954	2.1807538754130453	target	0	4	destabilized	0.77967063143063	0.42674724772601597	3.2046345152997193	2321	0	1833	1	alpha
RAC1_HUMAN	47	2.4509089970938014	1.9388730632743787e-4	-1.3373053554278798	2.346571834200919	1.9741607435400015	2.179283254091031	target	1	0	stabilized	0.7789960402131229	1.9741607435400015	2.4509089970938014	2325	0	1836	1	alpha
KCC1A_HUMAN	47	2.965784904596155	-6.391706274467816e-5	-0.5616505794705824	1.000694936115553	0.5485303234906053	2.1755392478501707	target	1	3	destabilized	0.7772765638571282	0.45580675552574657	3.2726756071509384	2335	0	1845	1	alpha
EFGM_HUMAN	47	1.2255562063126564	2.2683295403027644e-4	-0.7689570059609321	1.773847860882362	1.574057762013534	2.1726615382548045	target	2	0	stabilized	0.7759529313217086	1.957011857823458	4.6357127838189065	2344	0	1853	1	alpha
SCRN2_HUMAN	42	3.11297302856764	-5.556821042780653e-4	-0.6772066358380566	0.9992995784181042	0.4888283627212384	2.170090732198456	target	0	1	destabilized	0.7747689787512891	0.4888283627212384	3.11297302856764	2347	0	1855	1	alpha
6PGD_HUMAN	67	3.9719270885342777	7.58425965333042	0.7337756839791291	0.5509713535042716	1.6367668628079468	2.16180922833033	target	3	1	stabilized	0.7709454768086588	3.7675041196929735	0.41439328732814074	2361	0	1868	1	alpha
TIAR_HUMAN	47	2.090052050301267	1.4190870428091226e-4	-1.625280527186965	2.623231976976703	2.255534181380913	2.1610176848690275	target	3	2	stabilized	0.7705792611419005	2.255534181380913	3.2821149141073174	2363	0	1869	1	alpha
C1TC_HUMAN	57	0.49318136300496435	0.09269941951727673	-4.942592433344288	5.946478404374589	3.2208319257931013	2.15860332946303	target	3	0	stabilized	0.769461405825704	4.068852487296234	0.49318136300496435	2369	0	1874	1	alpha
AAKG1_HUMAN	42	2.730740811262031	-2.4110973991137011e-4	-0.6370781685981539	0.9985221720111674	0.5180856952988822	2.1576021511556753	target	0	3	destabilized	0.7689974898560838	0.514187542754008	2.730740811262031	2371	0	1875	1	alpha
GAL3A_HUMAN	52	3.9765220693780483	7.569916219908612	0.6930762458707065	0.5607740792917246	1.6353663171417803	2.155571034770573	target	3	0	stabilized	0.7680556697864112	1.6353663171417803	3.9956568383558877	2377	0	1880	1	alpha
H2AV_HUMAN	47	3.1655804971969688	7.2287624357773e-4	-1.5410390783427625	2.540795870480845	2.2559713690577454	2.1519765767956796	target	6	0	stabilized	0.7663867578516779	5.671976577950446	3.112709189728052	2387	0	1889	1	alpha
PTBP1_HUMAN	37	2.8888334428859626	0.0010218216508528551	-13.918202837066799	13.77875524387436	10.165481255387128	2.1495462214265886	target	3	0	stabilized	0.7652567600617304	10.165481255387128	2.8888334428859626	2390	0	1891	1	alpha
SMU1_HUMAN	47	2.1359161512449316	4.810289812364984e-4	-2.4737952291038487	3.537476248788278	2.7867635280675773	2.131743492916536	target	2	0	stabilized	0.7569401861744912	2.9599329811441457	2.8175005036278837	2429	0	1929	1	alpha
THIOM_HUMAN	42	0.5545406989535246	-1.3296932487967837e-4	-0.7380010047044832	1.001719377888928	0.4832032983588309	2.124858677290738	target	0	1	destabilized	0.7537052953604789	0.4832032983588309	0.5545406989535246	2446	0	1945	1	alpha
U5S1_HUMAN	57	3.4299574137496456	6.63491873766237	0.6821979204082271	0.6092940872244943	1.6261600589872092	1.6174629177788287	target	5	0	stabilized	0.7466860364994271	3.167266273622696	4.363241994267757	2482	0	1980	1	alpha
RL23A_HUMAN	42	3.851359478570114	-6.313828508934611	0.7571331326253793	0.6907867029157108	0.37378548430377795	2.1043236272328696	target	0	2	destabilized	0.7439940982718626	0.37378548430377795	3.851359478570114	2494	0	1991	1	alpha
K2C5_HUMAN	52	3.136370722340236	4.906044521463588e-4	-1.0795473315429085	2.0797100063217457	1.8838748739483666	2.1013061671532896	target	3	1	stabilized	0.7425591357359859	2.8761480607912002	3.8448950432054962	2499	0	1995	1	alpha
LSM6_HUMAN	67	3.1388852441983643	6.748539537036388e-4	-1.5949401504076985	2.5957877993358345	2.246634078852857	2.1010468820672386	target	2	0	stabilized	0.7424357357820348	2.246634078852857	3.1812465992016334	2500	0	1995	1	alpha
ENOG_HUMAN	57	2.6612013545913245	-2.6827030088200543e-4	-0.7497920363687398	1.0001626872998797	0.3790968294694894	2.095412505980689	target	0	3	destabilized	0.7397504342212409	0.35312605208630854	2.6612013545913245	2511	0	2005	1	alpha
CPSF6_HUMAN	62	3.9857721072037147	7.035405707929833	0.751745974527391	0.5348029690471562	1.6300810262245673	2.0836976964705705	target	1	0	stabilized	0.7341440540938481	1.6300810262245673	3.9857721072037147	2540	0	2033	1	alpha
SLK_HUMAN	57	3.0379002646239734	3.905200624628253e-4	-1.9412183316440612	2.9793179958987883	2.5957451861251717	2.0770558402747374	target	2	0	stabilized	0.7309514295950423	3.7523121614768797	3.0379002646239734	2556	0	2048	1	alpha
HSP77_HUMAN	62	3.587865506405421	2.5339123653959846e-4	-2.1245661618249234	3.1370447871004137	2.936038963095262	2.0678314096797754	target	2	0	stabilized	0.7265004299572934	3.7992722444769895	4.303010859319743	2585	0	2076	1	alpha
CUX1_HUMAN	37	3.0125765176455244	4.4383194025979353e-4	-0.891180994075895	2.159615061562885	1.9461359275796872	1.8471518188211529	target	5	0	stabilized	0.724381567694282	2.366504012920768	3.0125765176455244	2595	0	2085	1	alpha
LA_HUMAN	47	2.525699339439628	-1.2478104838297004e-4	-0.675565232918107	1.0056534675603357	0.5479722935201669	1.4618809855735753	target	1	4	destabilized	0.7236406201989276	0.5335106268198824	2.3647876053294725	2599	0	2088	1	alpha
RUXF_HUMAN	62	2.938449799771589	9.423311414811052e-5	-1.5342655218393495	2.54135428125162	2.16968789310549	1.509314787129177	target	6	0	stabilized	0.7150888976239456	2.7531161871699497	3.180624873928618	2642	0	2130	1	alpha
EXOS4_HUMAN	57	2.8744986802423598	5.250505812366792e-4	-1.4663956695351064	2.4685442853265194	2.1343808375272237	2.0418013612257004	target	3	0	stabilized	0.7138324384318095	2.5783258558227886	3.9203921533724277	2653	0	2140	1	alpha
DHX16_HUMAN	47	4.342782470802654	-11.667206852696118	0.6788828892485989	0.7373116774629268	0.34610372377319704	2.037714861665268	target	0	2	destabilized	0.7118290141510886	0.2904178109700498	4.342782470802654	2666	0	2152	1	alpha
BIP_HUMAN	62	3.243217018153504	2.2166545625410984e-4	-1.0754865696864901	2.07121622066716	1.9068739582788885	1.7774724445678096	target	4	0	stabilized	0.7092742214923969	1.9068739582788885	4.296072234471325	2682	0	2167	1	alpha
PSPC1_HUMAN	62	3.070167086271914	7.006685704726391e-4	-1.7958049798503262	2.8166602622912156	2.4877876448780656	1.61599856527026	target	6	0	stabilized	0.7078077112816545	2.4877876448780656	3.311423491659315	2693	0	2177	1	alpha
LG3BP_HUMAN	47	4.216924062391565	10.19534993527183	0.5331736523921183	0.7179712669404058	1.6245590257779592	2.026131865197146	target	1	0	stabilized	0.7061284901828646	1.6245590257779592	4.216924062391565	2702	0	2185	1	alpha
DBNL_HUMAN	67	-0.20670964365289268	4.09852748489852e-5	-2.8426017726991564	3.8666412108497537	3.266523923926064	2.0256325117119935	target	2	0	stabilized	0.7058820032496529	3.266523923926064	0.3010316202066505	2707	0	2189	1	alpha
GCSP_HUMAN	47	4.312783892195631	11.58847636511847	0.5563742561971466	0.6677599257852002	1.6544958369753955	2.018294591080306	target	1	0	stabilized	0.7022528929819347	1.6544958369753955	4.312783892195631	2724	0	2205	1	alpha
RFA2_HUMAN	42	3.380609047793213	-2.1931245615138908e-4	-0.5893784270860992	1.0103081517861807	0.610338944681887	2.016444566527928	target	1	4	destabilized	0.7013358450094324	0.4601070287676721	3.380609047793213	2727	0	2207	1	alpha
PSD10_HUMAN	37	2.973158776943095	8.658352126956694e-4	-1.9043996276796484	2.904024797781188	2.3599565778819414	2.0150305554582575	target	2	0	stabilized	0.7006343592828093	2.3599565778819414	2.973158776943095	2731	0	2210	1	alpha
MOC2B_HUMAN	52	1.646711419367496	1.5335206852048667e-4	-1.409745532081341	2.417379554451586	2.091969253447668	2.007445870226056	target	1	0	stabilized	0.6968632027024266	2.091969253447668	1.646711419367496	2749	0	2227	1	alpha
RADI_HUMAN	67	2.827089152142606	-2.3897959298400348e-4	-0.8870220850887078	1.0016765638342457	0.20922305808747063	1.9053898434353485	target	1	3	destabilized	0.6964655262492225	0.20922305808747063	3.5221754524054925	2751	0	2228	1	alpha
KATL2_HUMAN	37	3.319905446855489	4.371537836924887e-4	-0.9902148769555708	1.9933951726103256	1.798815205624197	2.0055350129586254	target	3	0	stabilized	0.6959108645440975	4.658560616104999	3.319905446855489	2754	0	2230	1	alpha
SPSB1_HUMAN	62	4.060827575345475	7.969266953513384	0.68180838141978	0.5694336583008133	1.971689025993435	1.5163631506837068	target	4	1	stabilized	0.69363793244259	2.557308761732727	4.092712241166638	2770	0	2245	1	alpha
DAZP1_HUMAN	37	3.08080933889725	8.859107284406874e-4	-2.3897888819683217	3.3898883567304314	2.7845855798303214	1.9959760038812913	target	7	0	stabilized	0.6911331557134447	3.502286925470426	3.08080933889725	2785	0	2259	1	alpha
RUVB2_HUMAN	62	3.32407768572896	9.468971355702425e-4	-0.9320538614059685	1.919706822732926	1.6851747131926778	1.9813671693453214	target	1	0	stabilized	0.6837870959965455	1.6851747131926778	3.32407768572896	2825	0	2298	1	alpha
PAK2_HUMAN	62	3.0225821877896584	9.540678454831622e-4	-2.7374478220428395	3.7379450177474265	3.0555831028728115	1.9809269345484986	target	2	0	stabilized	0.6835648839208686	3.0555831028728115	4.312666320531255	2827	0	2299	1	alpha
DCUP_HUMAN	42	4.1243991586653435	-7.5139516720212285	0.43253953327188244	0.8178658983870282	0.588910919785857	1.9766418157817647	target	0	3	destabilized	0.6813993521453435	0.22076376612930443	3.132756529598245	2838	0	2309	1	alpha
RT35_HUMAN	42	3.537726833282482	-9.762580511699847	0.5384047301722641	0.8263430381066394	0.5064000469524661	1.9630818385365194	target	0	1	destabilized	0.6745156049686084	0.5064000469524661	3.537726833282482	2882	0	2352	1	alpha
1433Z_HUMAN	52	2.886414008684573	-5.779115559019453e-4	-0.4570298275026262	1.001752440607908	0.5878810134437039	1.9616724114419772	target	0	2	destabilized	0.6737973805574178	0.534825096654889	2.886414008684573	2884	0	2353	1	alpha
EXOS5_HUMAN	52	3.840164432643486	5.3045379171518965	0.8676466527211955	0.4516502229705037	1.830732245232414	1.9491689872997626	target	1	0	stabilized	0.6674031213844266	1.830732245232414	3.840164432643486	2918	0	2386	1	alpha
TIPRL_HUMAN	52	3.2950014084759833	-6.597557531144578	0.9866902797851498	0.8229534789836921	0.642304701257216	1.946711146945451	target	0	1	destabilized	0.6661413573692607	0.642304701257216	3.2950014084759833	2925	0	2392	1	alpha
NOSIP_HUMAN	42	0.6824845822293822	1.5920444254723557e-5	-1.9625864763376926	2.9819449874059223	2.461131934039218	1.9392118213585217	target	1	0	stabilized	0.6622816128718653	2.461131934039218	0.6824845822293822	2958	0	2424	1	alpha
DEN2A_HUMAN	52	2.5043167012926744	0.0056155789414916064	-1.8688450235573597	2.9377853812690797	2.533667933702731	1.7400176088848038	target	2	1	stabilized	0.6608737831870682	2.533667933702731	4.087808182417185	2966	0	2431	1	alpha
VIGLN_HUMAN	57	3.9984812537429923	-6.226035890566182	0.9885623492480696	0.7525688965827267	0.20993153580304044	1.9307428936588726	target	1	2	destabilized	0.6579048478487174	0.20993153580304044	3.9984812537429923	2981	0	2445	1	alpha
GNPI2_HUMAN	62	2.346150301235172	-3.581665963455717e-4	-0.7044616265779557	0.8380568229484702	0.22773117861795572	1.9304292711577407	target	0	3	destabilized	0.6577423984740537	0.22617401417496547	3.9046133259775586	2984	0	2447	1	alpha
5NTC_HUMAN	37	3.208987271252845	-6.480823800404183e-4	-0.684422282243415	1.00213558547802	0.4039085269793563	1.91624710117695	target	0	5	destabilized	0.6503686384444647	0.3430439239976366	3.208987271252845	3029	0	2491	1	alpha
GUAA_HUMAN	52	3.43553786990986	-8.262873904468938	0.5443710481492543	0.7555977974838937	0.5725688480868191	1.915228427286898	target	0	2	destabilized	0.6498368986974735	0.5725688480868191	4.0020906647812	3030	0	2491	1	alpha
ITAE_HUMAN	67	3.671746368646287	3.5533857189572178	0.6868987101585697	0.49965610058029136	1.5252593071264127	1.8964499579893024	target	4	2	stabilized	0.6399836952915958	3.2123591157448805	3.843209369436309	3086	0	2546	1	alpha
RL10_HUMAN	47	4.031607204151806	-6.599069896414762	0.662532121575756	0.8002344173782918	0.36820042963918453	1.890446132107701	target	0	1	destabilized	0.6368128499506652	0.36820042963918453	4.031607204151806	3108	0	2567	1	alpha
ARL1_HUMAN	47	3.3808275444228153	-8.314307568477007	0.5890691519716561	0.7780646012360054	0.5935943757773654	1.887406263279173	target	0	2	destabilized	0.6352035390690041	0.5698833258082144	3.3043809160253304	3116	0	2574	1	alpha
ATF1_HUMAN	62	3.547683240074519	8.70100790560486e-4	-2.1008022128847688	3.1013160997830793	2.7182897262930314	1.8866840170206975	target	3	0	stabilized	0.6348207998054193	4.041348589267162	4.347654542176468	3119	0	2576	1	alpha
E41L5_HUMAN	42	2.8390373645146005	2.9985203818305885e-4	-2.896157578748162	3.9040599189424046	3.5097644692938093	1.8861222629840346	target	1	0	stabilized	0.6345230087188259	3.5097644692938093	2.8390373645146005	3122	0	2578	1	alpha
OAT_HUMAN	57	3.4648392748208936	6.298740653136972e-4	-1.8723285386594348	2.874890070007096	2.7196191742942926	1.885373953221797	target	5	0	stabilized	0.6341261848965765	2.7196191742942926	4.1626543118427195	3124	0	2579	1	alpha
AL1A2_HUMAN	57	3.2312672789283585	5.522331181212359e-5	-1.2957965891960304	2.2928370655145476	2.052708253565585	1.8842877028409224	target	6	0	stabilized	0.6335498730097031	2.8346110672173292	3.9247931987649642	3127	0	2581	1	alpha
FGR_HUMAN	52	-14.657296560615585	-2.161650341657054e-5	-1.1224432283743109	1.0317124862859497	0.22759069959496658	1.8821353826122185	target	0	4	destabilized	0.6324069740766013	0.22759069959496658	4.119508597479479	3135	0	2588	1	alpha
RUVB1_HUMAN	62	3.4234109025627046	5.058773482642049e-4	-1.9821195479278477	3.0119365147402837	2.7376276561020205	1.868034525783883	target	1	0	stabilized	0.6248868223895316	2.7376276561020205	3.4234109025627046	3182	0	2634	1	alpha
TCEA1_HUMAN	37	3.5420007697185323	0.001003799942517632	-0.8167350563507791	1.8227489574785216	1.7853070305467074	1.4222124043912443	target	5	0	stabilized	0.6247381409068984	2.8418696366792475	3.5420007697185323	3184	0	2635	1	alpha
SYNC_HUMAN	57	4.001653953214773	-6.2193695902421116	0.7241073904386857	0.7537802121161312	0.14781163065320507	1.8619778891354402	target	0	2	destabilized	0.6216393039913727	0.14781163065320507	4.112443978351251	3200	0	2650	1	alpha
VIME_HUMAN	52	3.9751245928190513	6.977834623215995	1.35677554474106	0.2765985875757121	2.6586870651320607	1.3731433211613413	target	5	0	stabilized	0.6198079397008547	2.790416181191961	4.344137285827599	3211	0	2660	1	alpha
TBB8_HUMAN	47	3.9795078476598587	6.5971097630048385	0.9760694583357156	0.462537903845209	2.098406516335736	1.4597428508501211	target	4	1	stabilized	0.6166276798750483	4.414018999217996	3.4948952905652644	3235	0	2683	1	alpha
GBB4_HUMAN	57	4.058591020921213	8.781353608064046	0.7353694611952671	0.5998768584758266	1.7514688632882254	1.8502507360391829	target	1	0	stabilized	0.6153211629006199	1.7514688632882254	4.058591020921213	3248	0	2695	1	alpha
RAB9A_HUMAN	47	2.196408200566565	-0.03176879607446629	-0.886032869215861	1.0132793279241221	0.3648072942786445	1.7061667203627913	target	0	3	destabilized	0.61410510320113465	0.3648072942786445	1.261071944833182	3257	0	2703	1	alpha
ROA3_HUMAN	47	3.201512128083977	2.4292560471795205e-4	-0.7880312018460216	1.788247150068727	1.6051928838350544	1.8373189063789765	target	5	0	stabilized	0.6083073928964781	4.34303513678516	0.734909059002437	3291	0	2736	1	alpha
KCD12_HUMAN	62	3.788958250946911	-4.953241588421187	0.43639458065409853	0.8291682716139044	0.6109970502720917	1.835580494945978	target	0	2	destabilized	0.6073607774992883	0.45474185956005164	3.788958250946911	3299	0	2743	1	alpha
RFA3_HUMAN	67	4.006479065703833	6.39315949293382	0.6202572992253054	0.5718307761016898	1.5873215795722426	1.8319413245933187	target	3	0	stabilized	0.6053762376786137	2.1619558270985397	3.4368180594333344	3311	0	2754	1	alpha
MARCS_HUMAN	52	3.1319830806066142	7.890150575709223e-4	-1.6486187046679306	2.681779419438482	2.24783470601384	1.8250349428245287	target	3	0	stabilized	0.6015991336043245	2.24783470601384	2.875452847374866	3339	0	2781	1	alpha
LSM1_HUMAN	57	2.760709375291031	-2.267059661092561e-4	-1.1854665258070982	1.0384939176451875	0.18709625496685414	1.821425097120277	target	0	5	destabilized	0.5996192150839253	0.18709625496685414	3.7190865693407513	3355	0	2796	1	alpha
ATOX1_HUMAN	67	1.826684907706764	0.15696956645520282	-1.9225328483987556	2.9338066235237967	2.032078803106261	1.82118828269824	target	2	0	stabilized	0.5994891906219921	2.154609521172099	3.347886710001294	3356	0	2796	1	alpha
SRP09_HUMAN	57	2.8359935296219025	4.530574776464006e-4	-1.608872325738804	2.6301492722585262	2.4180593981904708	1.369014563132238	target	4	0	stabilized	0.5984705654156965	2.4180593981904708	3.129896598472163	3365	0	2804	1	alpha
CCD58_HUMAN	57	3.6590085398338084	5.5903698664121055	0.5803930921504465	0.6684456576925364	1.6875979615427994	1.5647177373027015	target	4	0	stabilized	0.5939427527314607	1.745798390971731	3.9953767455733624	3396	0	2834	1	alpha
CADM1_HUMAN	47	4.322570761034645	13.608647069827674	0.6363603923288643	0.6886837304775955	1.6753262558152968	1.8070277529864318	target	1	0	stabilized	0.5916833700900641	1.6753262558152968	4.322570761034645	3406	0	2843	1	alpha
DX39B_HUMAN	67	4.329902282581375	11.79214013530314	1.100203902138199	0.45024572175912936	2.295341740345003	1.8056114386711473	target	1	0	stabilized	0.590899281609201	2.295341740345003	4.329902282581375	3411	0	2847	1	alpha
SAP3_HUMAN	62	1.6778526270921037	-0.04929506357511725	-0.7718897048992363	1.008243161947004	0.5222004965370519	1.8034793117966863	target	0	1	destabilized	0.5897177501543741	0.5222004965370519	1.6778526270921037	3418	0	2853	1	alpha
CNPY2_HUMAN	52	3.3907670838641186	7.067619524452832	0.7451415498299259	0.557344761722955	1.6057178239167083	1.7969396449843207	target	4	0	stabilized	0.5860850206955455	1.7244070726302005	3.4940765914472176	3439	0	2873	1	alpha
FLII_HUMAN	47	3.3507938329222164	4.6991230099327036e-4	-0.8536042752019579	1.8596928994513493	1.7790665972870672	1.796240706321791	target	2	0	stabilized	0.5856959844641239	2.15154308956607	3.3507938329222164	3442	0	2875	1	alpha
RLA2_HUMAN	37	3.5359482612801325	-0.0010527653686965694	-0.6567947280983559	1.0100460478088258	0.6431224108035132	1.7845829808994664	target	1	2	destabilized	0.5791847637912733	0.27162418438311464	3.5359482612801325	3485	0	2917	1	alpha
PI42B_HUMAN	52	3.4123629404418296	6.865099031718246	0.7543628444379853	0.399983211171969	1.5365496677264026	1.774120262136956	target	2	0	stabilized	0.5733046730986416	1.9309506059756183	5.397986586519447	3538	0	2969	1	alpha
KCRB_HUMAN	62	3.3101547796387742	1.1810294868649925e-4	-1.2063927864955732	2.2043919598540906	2.0132283810761322	1.7684136107241142	target	3	0	stabilized	0.5700828795723805	2.7481380031321505	3.3101547796387742	3550	0	2980	1	alpha
LMBL3_HUMAN	52	4.221184422438371	9.686177549920497	0.4079470683770898	0.7598551108786529	1.5167793737291233	1.7102230275641201	target	3	0	stabilized	0.5699217062709248	1.633452676181729	2.098496666163836	3552	0	2981	1	alpha
PDIA3_HUMAN	37	3.3775249217539183	0.0012031514454645248	-1.146064965464323	2.158317722794554	1.973568056588714	1.7668179359580511	target	3	0	stabilized	0.5691801523516289	1.973568056588714	3.3775249217539183	3556	0	2984	1	alpha
HDHD1_HUMAN	37	3.7355101063898903	-4.2435179473114917e-4	-0.8114601148229301	1.024758345778247	0.41977125709790486	1.7660541102299578	target	0	1	destabilized	0.5687477417066868	0.41977125709790486	3.7355101063898903	3559	0	2986	1	alpha
MTND_HUMAN	62	-1.0278252698518595	-0.1281017908435803	-1.8705682266995056	1.0001865985086515	0.4949198895060023	1.7536421791481287	target	0	5	destabilized	0.5616948703724214	0.2254322953009632	3.173279498331872	3602	0	3028	1	alpha
UB2V1_HUMAN	57	2.14990079211281	1.7994391923799668e-4	-1.42434487584869	2.544103368408898	2.1562509016288898	1.7507559734157934	target	5	0	stabilized	0.5600476794658722	2.4753972714252517	3.2022223066627094	3614	0	3039	1	alpha
ECHB_HUMAN	67	-0.7260542863592631	-4.698976891306962e-5	-0.9543548824420127	1.0123478375264827	0.26408105276259625	1.7474025289705102	target	0	3	destabilized	0.5581304161570547	0.26408105276259625	2.6372003544540497	3629	0	3053	1	alpha
NLRP9_HUMAN	42	3.477754900970213	-8.83692217766725	0.6280669565367731	0.7565453073176902	0.5349092123120749	1.745718228401606	target	0	2	destabilized	0.5571660631807772	0.37186825442637084	3.477754900970213	3637	0	3060	1	alpha
IPP2B_HUMAN	67	2.800236242595406	3.470584310527669e-4	-4.327589222961497	5.384537840356323	4.712861272352753	1.743306242733998	target	3	0	stabilized	0.5557834497472542	5.204461739847239	2.336902599334217	3643	0	3065	1	alpha
JUPI1_HUMAN	52	1.9732107780650971	2.9802386671753234e-4	-1.115795698242077	2.1190435661855123	1.8921072878203966	1.7420610787926771	target	4	0	stabilized	0.5550689402683799	3.563922880916226	4.798599430501159	3648	0	3069	1	alpha
RBM8A_HUMAN	52	3.7034704379154273	3.898384631217399	0.5581379313159044	0.6587460699834783	1.6200577496013815	1.7380023615774163	target	2	0	stabilized	0.5527363856325052	1.9077876026601877	3.7034704379154273	3666	0	3086	1	alpha
RL35_HUMAN	42	3.929909409422658	-6.126436369973739	0.9377623976071935	0.5983801300980548	0.18796444116824515	1.7334079095260544	target	0	2	destabilized	0.5500893607203048	0.18796444116824515	3.929909409422658	3692	0	3111	1	alpha
SIAS_HUMAN	42	3.1248168770535596	-3.762827362765586e-4	-0.5144604662207386	0.999516064824916	0.6239169273838523	1.7291231096218744	target	0	1	destabilized	0.5476144069551779	0.6239169273838523	3.1248168770535596	3712	0	3130	1	alpha
MOES_HUMAN	67	3.2459902658411974	5.635664794913607e-4	-0.9148527417025627	1.9154321034346122	1.7593841927045548	1.7175370411077355	target	2	1	stabilized	0.5408913117567609	1.7593841927045548	4.299841026643148	3763	0	3180	1	alpha
PGP_HUMAN	42	4.322196673383188	-10.109157006836227	0.4906974501032799	0.81250745116822	0.4958094790420194	1.7113411844935422	target	0	3	destabilized	0.5372773815148861	0.29376318883923747	3.386456596126898	3796	0	3212	1	alpha
AGAL_HUMAN	37	3.1872491667919434	8.407448911638299e-4	-3.105464796061324	4.112908493610529	3.5300756558677975	1.707993267649826	target	6	0	stabilized	0.5353191537015992	3.5300756558677975	3.1872491667919434	3805	0	3220	1	alpha
RECQ1_HUMAN	52	3.4395140052696616	-9.353949515345144	0.6404930323145542	0.6894106022201648	0.4279855750402962	1.7055668447108527	target	1	3	destabilized	0.5338975157237894	0.4279855750402962	3.361912179500785	3814	0	3228	1	alpha
ZFYV1_HUMAN	62	2.7226434337362586	0.03403218665110055	-2.9512834774838312	3.958175618920807	3.2960071452674353	1.7022440296183683	target	3	0	stabilized	0.5319473980276702	3.2960071452674353	4.36878371577054	3834	0	3247	1	alpha
LXN_HUMAN	42	2.498961849387888	-3.545261618152421e-4	-0.4302723344847882	1.000079252871448	0.6658306611052468	1.7021839747811187	target	0	2	destabilized	0.5319121176004277	0.5144658434332104	2.498961849387888	3836	0	3248	1	alpha
UFD1_HUMAN	47	2.861550511418853	5.44029956924689e-4	-0.8374876539170903	1.8386552575582427	1.6145055412277962	1.7013615900723182	target	2	0	stabilized	0.5314288658212846	1.6973149354417385	2.861550511418853	3840	0	3251	1	alpha
EXOS9_HUMAN	47	4.0080224054684725	7.839928530930424	0.7192560609298697	0.6013506457129782	1.6572236459566194	1.7011062571730542	target	3	0	stabilized	0.531278778936584	1.6572236459566194	3.463602646192281	3842	0	3252	1	alpha
ATPB_HUMAN	57	3.491764946885911	7.457784995696963	0.8265137137670562	0.5402210937913705	1.869847376095348	1.6906246314014832	target	5	1	stabilized	0.5250980650276849	3.1554564537100847	3.9131352404690616	3895	0	3304	1	alpha
LC7L3_HUMAN	37	3.9465343541697773	0.0011124092172331806	-2.487095911608554	3.7653691479601594	3.3721739575928362	1.6246196933115784	target	7	0	stabilized	0.5227227589514071	3.718660593723886	3.9465343541697773	3918	0	3326	1	alpha
HSP7E_HUMAN	42	3.4814497991584306	-7.2366301133561315	0.4547803359602175	0.8366731579117922	0.5757444352545616	1.6828855129183309	target	0	1	destabilized	0.5205098872966833	0.5757444352545616	3.4814497991584306	3939	0	3346	1	alpha
NUCB2_HUMAN	67	3.1685385769342442	-0.0011356319890226205	-0.5966556544305976	1.0567172534253386	0.6117990619156849	1.6729869649168012	target	0	2	destabilized	0.5146106305318955	0.4877129611439891	2.5501874595299365	3979	0	3385	1	alpha
CTNA1_HUMAN	47	3.868406560357246	4.58673699515676	0.6038049542551177	0.6281772661154242	1.774910324464372	1.3611517921543284	target	3	0	stabilized	0.5144487538714987	2.4537235849696035	3.868406560357246	3980	0	3385	1	alpha
ACTBM_HUMAN	47	3.292906738158049	5.229618805195796e-4	-4.191605277479558	5.199189081670568	5.054718863551675	1.6667162161411582	target	3	0	stabilized	0.5108553530087673	9.092050775865053	5.635903491110418	4012	0	3416	1	alpha
MFAP1_HUMAN	67	3.7487457882712607	4.953312470555552e-4	-2.3130826490260814	3.126653538688784	2.8691045349265183	1.5687346189984792	target	6	0	stabilized	0.5091795214826734	2.993740376654777	1.4730532749793694	4024	0	3427	1	alpha
RNH2B_HUMAN	47	3.257603125919466	4.960653160551038e-4	-0.7078163046117403	1.7423982350097353	1.6468565483393274	1.6509358002330465	target	1	0	stabilized	0.5013422787991647	1.6468565483393274	3.257603125919466	4086	0	3488	1	alpha
ST5_HUMAN	37	-5.152827918710667	-3.813812578299573e-6	-1.1004029973293592	0.999685517390711	0.15058508830430806	1.650075078228329	target	0	3	destabilized	0.5008207888338697	0.10900218074371118	3.3614262544210884	4092	0	3493	1	alpha
SRSF3_HUMAN	37	-0.6259076663181368	1.660070980974598e-4	-2.165613533450224	3.1671002664917567	2.6483935450314187	1.645992115696337	target	7	0	stabilized	0.49834331226548206	4.092729934894674	3.5978945682513572	4107	0	3507	1	alpha
H13_HUMAN	42	3.938092839311993	-9.957331451353753	0.7401849947200918	0.6821071667407055	0.33040266002567503	1.6454077535703635	target	0	2	destabilized	0.49798822801238357	0.33040266002567503	3.938092839311993	4113	0	3512	1	alpha
CDK12_HUMAN	52	2.4543689342898145	1.1958525917833189e-4	-1.3083319743220605	2.3085186841140226	1.9555048704716949	1.6365954343157207	target	4	1	stabilized	0.49261812936982213	3.1133893929912	3.3761175999830244	4151	0	3549	1	alpha
PSMF1_HUMAN	37	2.6876816910971506	-1.6375953097266582e-4	-0.7012827447289316	1.0037671408888391	0.4019053380162495	1.6348494516815448	target	0	4	destabilized	0.49155072162749747	0.324218874044927	2.6876816910971506	4158	0	3555	1	alpha
ACLY_HUMAN	42	4.002866336427509	-6.919466483020209	0.48533200586451364	0.7808312408374423	0.5410281749325283	1.634147031151052	target	0	2	destabilized	0.4911209747342279	0.5410281749325283	4.002866336427509	4163	0	3559	1	alpha
K1C18_HUMAN	42	3.6418102272847004	4.6983035647125	0.5445163131569857	0.6648362673763204	1.6819421701063593	1.6284734865236172	target	5	0	stabilized	0.4876430646827437	2.5493249336790482	3.967843331391865	4196	0	3591	1	alpha
S30BP_HUMAN	57	3.3672300927006367	6.571114219823737	0.7555335025996497	0.46582335348062576	1.515661458384054	1.6254386633324527	target	3	2	stabilized	0.48577772601878005	2.107510009274517	3.483089896441551	4208	0	3602	1	alpha
DHYS_HUMAN	57	2.81873497769543	2.639581731046949e-4	-2.1439811783211824	3.2171827145127594	2.6794968262211216	1.4740556575440484	target	3	0	stabilized	0.48489586554660286	2.706967113933553	2.786693566733129	4216	0	3609	1	alpha
DBLOH_HUMAN	52	4.0112672634786595	8.313132656563555	0.4752145476280982	0.7397196470718688	1.5022749828921123	1.617932960170594	target	1	0	stabilized	0.48114938401435897	1.5022749828921123	4.0112672634786595	4239	0	3631	1	alpha
RL8_HUMAN	57	3.5379727606638713	-9.91570323513201	0.6595029375819381	0.6349733510956579	0.24952244467339568	1.3201475478383429	target	0	4	destabilized	0.48010151588541705	0.1638055281198746	3.559841173698216	4246	0	3637	1	alpha
T2FB_HUMAN	47	0.9710229584797293	9.48717256079491e-5	-3.1479901847964804	4.161339606597223	3.646652995201434	1.6161716038381675	target	1	0	stabilized	0.48006014495500776	3.646652995201434	0.9710229584797293	4247	0	3637	1	alpha
AP3D1_HUMAN	42	3.5485733246576427	-10.922942209129802	0.48645417610298203	0.7666902722158774	0.5280598797365383	1.6128527211897359	target	0	2	destabilized	0.47800448759037817	0.3918757236756559	3.5485733246576427	4267	0	3656	1	alpha
VATE1_HUMAN	42	3.101152243215514	6.86918864552287e-4	-1.3569292820161263	2.3883511416111114	2.148134078254528	1.6124248950270297	target	1	0	stabilized	0.4777391918756376	2.148134078254528	3.101152243215514	4271	0	3659	1	alpha
KCC2B_HUMAN	37	4.270358831946529	-9.370329118309355	0.554872663339588	0.7113574430795151	0.34500480645474363	1.6051301144276902	target	0	1	destabilized	0.4732048214753781	0.34500480645474363	4.270358831946529	4309	0	3696	1	alpha
NONO_HUMAN	42	3.869916246866122	5.3668128192554185	0.6630856497245451	0.6389285418646321	1.6485451288875828	1.6030761514872336	target	7	0	stabilized	0.4719243781055691	5.847714371207958	3.3503433596141456	4320	0	3706	1	alpha
CABP8_HUMAN	42	2.3795582415737724	3.5595314191153444e-4	-1.5931214821547828	2.689345231573181	2.2093952474480267	1.6012802895728084	target	1	0	stabilized	0.47080349025461815	2.2093952474480267	2.3795582415737724	4332	0	3717	1	alpha
RL18A_HUMAN	42	3.7390098186766036	-5.548258335913837	0.9262203682212946	0.6390348311097518	0.2160512803933969	1.5934566936675876	target	0	1	destabilized	0.4659056776421896	0.2160512803933969	3.7390098186766036	4384	0	3768	1	alpha
SEP11_HUMAN	67	3.8517093187610993	-5.029832170206932	0.44049713266138757	0.8047895904694573	0.5842519913752491	1.5929894446652655	target	0	1	destabilized	0.4656124048326793	0.5842519913752491	3.8517093187610993	4388	0	3771	1	alpha
EIF3C_HUMAN	57	-3.1439696849727246	0.12642606843736495	-3.8493476326668183	4.852528866664324	1.6390500275970847	1.5925717063400697	target	4	0	stabilized	0.4653501349795588	8.98033694164567	2.141010246561	4390	0	3772	1	alpha
M3K12_HUMAN	57	-6.099347500229832	0.04519046046316735	-1.2371481479011006	2.2375125746248155	1.5090740701568655	1.5045062115570245	target	2	0	stabilized	0.46294169351930975	1.78829393215424	4.583380934275523	4413	0	3794	1	alpha
SCRN1_HUMAN	47	2.8498083530979614	-5.075922645684617e-4	-0.716145331603537	0.9618554050942306	0.3801471388155262	1.582259338096407	target	1	2	destabilized	0.4588537864390235	0.18545675927618305	2.8498083530979614	4449	0	3829	1	alpha
1433G_HUMAN	47	0.00659019930048844	-2.721436078484227e-4	-0.8290107691286943	1.0166627953121654	0.5022682828512789	1.5803596351446905	target	0	4	destabilized	0.4576524383181992	0.5022682828512789	2.2979949428962985	4464	0	3843	1	alpha
G6PI_HUMAN	67	3.3372642199099425	7.443749950324004	0.8084329830552233	0.3456280887114544	1.550690979489807	1.5764277579654618	target	1	0	stabilized	0.45516137463678136	1.550690979489807	3.3372642199099425	4489	0	3867	1	alpha
DOPD_HUMAN	42	2.9057015915023148	-6.798629994900778e-4	-0.5412408276913075	1.0043462831758165	0.5610397616980755	1.5760582565344503	target	0	4	destabilized	0.45492695555862905	0.2625412808940237	2.9057015915023148	4493	0	3870	1	alpha
PEBB_HUMAN	52	-1.5379929817789117	7.482145563902295e-5	-2.000228033700033	3.008982535587167	2.3895108394580373	1.5696422209851921	target	3	0	stabilized	0.4508477086677402	2.3895108394580373	4.0846839495076095	4520	0	3896	1	alpha
DNJC8_HUMAN	42	2.8773778689389915	-6.30616385472731e-4	-0.558669306445652	1.002973520437317	0.6004066658526312	1.5680749692493179	target	1	2	destabilized	0.4498487328065065	0.5927757125022443	2.8773778689389915	4533	0	3908	1	alpha
SAHH2_HUMAN	67	4.042499172257569	-6.579160684920575	0.6516764341732555	0.7069955644774675	0.2881918973156164	1.5516465678497444	target	0	4	destabilized	0.43931666892638116	0.2476009790265561	3.3854730646779987	4605	0	3979	1	alpha
KPRB_HUMAN	37	4.424273152727296	-0.01418113091005112	-0.6774509456559075	1.000005110079898	0.42086920035629594	1.506230521961263	target	0	4	destabilized	0.43794636454105124	0.3592820678883501	4.424273152727296	4621	0	3994	1	alpha
PSDE_HUMAN	42	2.9343397110618152	-7.960279609652219e-4	-0.6964982724791493	1.0104277975171383	0.4661907013258057	1.5459709722639237	target	0	1	destabilized	0.43565217396303585	0.4661907013258057	2.9343397110618152	4639	0	4011	1	alpha
CR025_HUMAN	57	-10.743355971742599	4.450401003148681e-5	-1.500923511223653	2.5279332215635355	2.1392665936358473	1.5417309384327027	target	1	0	stabilized	0.43290577122146906	2.1392665936358473	-10.743355971742599	4666	0	4037	1	alpha
SPT5H_HUMAN	57	3.420117970183167	-8.016484669249964	0.6278090569296526	0.7355950581101309	0.4009081260902537	1.5373694766387067	target	0	1	destabilized	0.43007282385178297	0.4009081260902537	3.420117970183167	4695	0	4065	1	alpha
RFC2_HUMAN	47	3.8357418616329033	-6.374436871517531	0.3996546528898597	0.8568469959159914	0.6054614808478584	1.5331702070749373	target	0	1	destabilized	0.427337622477216	0.6054614808478584	3.8357418616329033	4714	0	4083	1	alpha
STRN_HUMAN	57	2.2805230600705673	-3.886677957718366e-4	-0.7462542815288391	1.0123862929711605	0.4419831963010521	1.5272058616177147	target	0	2	destabilized	0.42343983156878384	0.4419831963010521	3.11794365548321	4751	0	4119	1	alpha
ALDH2_HUMAN	52	4.01339585678543	7.847256278969726	0.6316015611085394	0.6221269002166058	1.7728404676938134	1.5216014174026664	target	3	0	stabilized	0.41976334432976053	1.8822858455440268	3.4410766308288867	4786	0	4153	1	alpha
ANX11_HUMAN	42	3.103380962629322	-5.639287018337754e-4	-0.4150792529307772	0.9703835858807829	0.6185917142782944	1.5177618726298807	target	0	1	destabilized	0.41723679751790993	0.6185917142782944	3.103380962629322	4808	0	4174	1	alpha
PAPS1_HUMAN	52	3.4154856168449896	-8.001973717363127	0.5525231534167587	0.7427081912284375	0.47179280237884463	1.5111313103834771	target	0	2	destabilized	0.41285858248198354	0.4619018889868675	3.848044378804876	4845	0	4210	1	alpha
UBXN1_HUMAN	52	3.7167096606939345	4.438315256115595e-4	-1.629886791387413	2.636651437424774	2.6921042899876793	1.5047249322389302	target	4	0	stabilized	0.4086101122200411	3.109213590210968	3.06103224959571	4885	0	4249	1	alpha
FABP5_HUMAN	42	4.047521225535865	-7.134970453048389	0.5918834836088934	0.7684595357988017	0.4499987601105186	1.5014517233395228	target	0	3	destabilized	0.4064324556363219	0.3548169289893764	3.525814401305037	4902	0	4265	1	alpha
IGBP1_HUMAN	57	1.2153680508923441	0.11845239231630243	-3.0959818651986986	4.115427550008265	2.5895777559319964	1.4999843692545116	target	2	0	stabilized	0.40545468755687836	6.535954830947866	1.2153680508923441	4912	0	4274	1	alpha
KAD3_HUMAN	52	3.8738256862858735	5.65211486749894	1.017075854687684	0.46382338391043987	2.103467660366594	1.494621790246499	target	5	0	stabilized	0.4018731917243144	2.6211733704051263	3.8898651702570337	4945	0	4306	1	alpha
PPM1F_HUMAN	47	0.23352194998772144	-2.196104908925607e-4	-0.591673781058627	1.0184152035467535	0.5913163134790467	1.4923745882134618	target	0	2	destabilized	0.4003685347563896	0.5913163134790467	2.852295152067531	4960	0	4320	1	alpha
U3IP2_HUMAN	67	4.054366872490028	8.575654042745905	0.7768747252609305	0.5937331586535002	1.965488515572381	1.490641927170152	target	2	1	stabilized	0.39920685078365403	1.965488515572381	4.379707806648107	4969	0	4328	1	alpha
NUCL_HUMAN	62	4.006528268280661	7.876161731267372	0.6265648538178187	0.6656329009206893	1.6637925972342755	1.4879026059713085	target	1	0	stabilized	0.39736748129248944	1.6637925972342755	4.006528268280661	4994	0	4352	1	alpha
IF1AX_HUMAN	42	4.0220051011247655	-5.858153200347571	0.375430931434662	0.8550492236451914	0.533690985575604	1.4869538859761093	target	0	1	destabilized	0.3967296555486725	0.533690985575604	4.0220051011247655	5000	0	4357	1	alpha
SF3B2_HUMAN	57	4.321909405889897	14.982005972125789	0.5354501306124022	0.6987340163201534	1.6463449720846886	1.3663710397812938	target	5	0	stabilized	0.3960730349153586	2.4996168436215096	4.086181911128699	5006	0	4362	1	alpha
MGN_HUMAN	42	3.4061052696335063	9.262733826622819	0.5160233967930454	0.5967406011225103	1.5074241553980703	1.3584582206499354	target	5	0	stabilized	0.39509201901589364	3.360403274454327	3.2141896097196794	5020	0	4375	1	alpha
SRSF4_HUMAN	47	3.520949237534073	5.73019509906484	0.7724321807619275	0.5776875302546555	1.7313499993716648	1.484205910158722	target	4	0	stabilized	0.3948798885960432	3.6317327505478922	3.520949237534073	5023	0	4377	1	alpha
RS11_HUMAN	47	4.086256303828024	-6.996538908330552	0.6476969629755772	0.7408340279882072	0.17125655448656646	1.4835825482021674	target	0	1	destabilized	0.39445980342186876	0.17125655448656646	4.086256303828024	5025	0	4378	1	alpha
K2C7_HUMAN	37	2.001902935466509	-0.027615401773365644	-0.9457144141364511	1.0369311163834738	0.4629303764750578	1.4830522596039142	target	0	2	destabilized	0.3941023016474638	0.26064755202895795	2.001902935466509	5029	0	4381	1	alpha
ERO1B_HUMAN	62	3.9879310712838865	6.586861983399731	1.2037208488318294	0.3666938835783196	2.167691854153234	1.4726178678247508	target	3	1	stabilized	0.38704167940104106	4.158934071465348	3.9371502592002074	5090	0	4441	1	alpha
ACTB_HUMAN	52	3.395594109870549	-8.299918687277023	0.6970483236807767	0.7093189770186286	0.3947313363683495	1.4711006384080256	target	1	3	destabilized	0.386010854240372	0.3947313363683495	4.324896101868932	5103	0	4453	1	alpha
PPIL1_HUMAN	67	3.4021832935631973	6.28274086045637	0.6458278847057706	0.5120045715801926	1.5382652641677224	1.4684319525383982	target	3	1	stabilized	0.3841951325089418	2.6070455337297935	3.7308256075327506	5121	0	4470	1	alpha
PUS7_HUMAN	42	3.3761195272516473	-7.611852948158021	0.5960263673789685	0.7848557899017841	0.5819456904153926	1.4676278578659094	target	1	3	destabilized	0.38364739523891556	0.5819456904153926	3.3761195272516473	5129	0	4477	1	alpha
GAPD1_HUMAN	42	3.947709371157412	-6.115427372859901	0.46441072714734277	0.7955183658355032	0.4959681045854624	1.4595994450980103	target	0	1	destabilized	0.37816204540607007	0.4959681045854624	3.947709371157412	5183	0	4530	1	alpha
KHDR2_HUMAN	47	-1.2638955951575737	8.788046467348394e-5	-3.2622387140371014	4.9239207908888085	4.769311105242419	1.4555287850479026	target	1	0	stabilized	0.3753692607499298	4.769311105242419	-1.2638955951575737	5219	0	4565	1	alpha
PSMD4_HUMAN	62	3.4398898239706948	5.033557914713258e-4	-0.7654953365320685	1.7397154310233791	1.6379035508607598	1.4538640608959772	target	2	1	stabilized	0.3742248815466031	1.8671321084007761	3.447402100533419	5235	0	4580	1	alpha
PUR4_HUMAN	47	4.142129772505922	-7.0333270185328916	0.3440317551906099	0.8515330806750457	0.6568294451911991	1.4506800616833126	target	0	1	destabilized	0.37203245454003797	0.6568294451911991	4.142129772505922	5260	0	4604	1	alpha
RM39_HUMAN	42	3.122366245640358	9.297044707073204e-4	-2.6546166413197545	3.660715372626704	3.297995046709956	1.4475526163160204	target	1	0	stabilized	0.36987427959091834	3.297995046709956	3.122366245640358	5290	0	4633	1	alpha
RSMB_HUMAN	42	3.4059796686766455	7.00987764754297	0.7447095637799767	0.4181249372053154	1.6326375752259672	1.445503819344939	target	6	0	stabilized	0.3684579247017927	3.2811414399197725	3.457911188147489	5307	0	4649	1	alpha
IF4A3_HUMAN	57	3.3649273700951516	7.221221624391942e-4	-0.7106538221856518	1.7488589549721634	1.7773148281188296	1.4436791995155416	target	3	0	stabilized	0.3671948547889064	2.5807621042060203	3.3649273700951516	5324	0	4665	1	alpha
DEOC_HUMAN	42	4.2169792024674235	-7.307853009644194	0.34480635436783125	0.8246769159204941	0.5577417472461348	1.4426213754093309	target	0	1	destabilized	0.3664618582584942	0.5577417472461348	4.2169792024674235	5332	0	4672	1	alpha
MTPN_HUMAN	37	3.428321926298883	6.896436324406225	1.1307335957081275	0.304858397583064	2.2869937112171566	1.441051483430199	target	3	0	stabilized	0.36537304395043985	3.224452027051073	3.428321926298883	5342	0	4681	1	alpha
HNRPD_HUMAN	62	3.7037346332793115	3.3707504037400304	0.666833458185507	0.6634925557867651	1.732834295566195	1.2076578100472668	target	4	0	stabilized	0.36466751117342655	1.732834295566195	3.9047140177426045	5347	0	4685	1	alpha
RPAC1_HUMAN	42	3.4765652841045056	7.036340120347566e-4	-0.6738522614539268	1.6767885027648992	1.6052110627884049	1.4398314397708205	target	1	0	stabilized	0.3645260510216464	1.6052110627884049	3.4765652841045056	5348	0	4685	1	alpha
SPF45_HUMAN	57	3.4094360926739675	8.727872629164112e-4	-4.720356353130988	5.696747556557397	5.1586694262068615	1.4352523934786425	target	2	0	stabilized	0.3613407177030568	5.1586694262068615	3.537192730901019	5387	0	4723	1	alpha
TF3C1_HUMAN	37	1.9610733764974562	-6.870618816446508e-4	-1.177385325305779	1.0962871137048926	0.440586885620044	1.4266573219163425	target	1	2	destabilized	0.3553341708455056	0.440586885620044	1.9610733764974562	5452	0	4787	1	alpha
TEX10_HUMAN	47	2.8156656644426192	-5.2978246981933515e-5	-0.5511445510467325	0.9949822863668596	0.4763899215124306	1.4253083615498727	target	0	1	destabilized	0.35438818438088027	0.4763899215124306	2.8156656644426192	5460	0	4794	1	alpha
RS3A_HUMAN	42	3.2309775917955266	-7.071332617345809	3.8045267545320023	0.5082864484771974	0.05409549861781915	1.4196611813391635	target	0	3	destabilized	0.3504182384518113	0.05409549861781915	3.2309775917955266	5506	0	4839	1	alpha
RAGP1_HUMAN	57	0.915258227776619	0.05472497933102999	-2.4454031316252998	3.4498032087690547	2.458336532996449	1.4178495404873621	target	4	0	stabilized	0.3491413156306727	6.573662967044028	1.982145335648371	5527	0	4859	1	alpha
DHSO_HUMAN	67	2.4580224840618135	3.5151883004996864e-4	-1.605636203524874	2.6057414178368132	2.136873047378998	1.4089513617181506	target	2	1	stabilized	0.3428457126033007	2.245505469836294	3.213517120877419	5610	0	4941	1	alpha
RS15A_HUMAN	42	3.8779464481005097	-5.790884776694571	0.873947659184769	0.5829674469425055	0.15801991164035242	1.4025399583328562	target	0	2	destabilized	0.33828484879877474	0.15801991164035242	3.8779464481005097	5655	0	4985	1	alpha
CLPP_HUMAN	52	3.829805609084593	5.075542598592821	0.7522526166421151	0.6159291477800182	1.8320694126593189	1.3991471390918484	target	4	0	stabilized	0.3358628646288427	4.114940239669229	3.905665416721284	5685	0	5014	1	alpha
ARL8B_HUMAN	47	2.577784778029276	0.022540009300896426	-1.9062015054573167	2.9213359964776076	2.5464136643425856	1.399124666328026	target	2	0	stabilized	0.3358468027410879	2.5464136643425856	2.5810368640627894	5686	0	5014	1	alpha
RNT2_HUMAN	52	4.005532382014732	7.48672550145888	0.6974746166436382	0.5894722563251166	1.7931159212811463	1.3960043859628355	target	2	1	stabilized	0.333614146142434	1.7931159212811463	4.005532382014732	5720	0	5047	1	alpha
ADRM1_HUMAN	62	1.994004362965505	0.08057208889256845	-2.508301585396076	3.5213528323244745	2.649877874806416	1.3919906685492955	target	2	0	stabilized	0.33073485826137883	2.649877874806416	1.994004362965505	5745	0	5071	1	alpha
ZC3HF_HUMAN	37	2.9473332121997164	0.09008382101068646	-1.2597355600832114	2.2609270621363966	2.0475291541354466	1.3910291514808748	target	1	0	stabilized	0.3300438699329753	2.0475291541354466	2.9473332121997164	5756	0	5081	1	alpha
RANDOM3100	67	4.019565445848056	7.767999831994976	0.48927373477313163	0.7288114988411166	1.5367246889968926	1.3880815359818295	target	2	1	stabilized	0.32792260386203975	2.2536976313262227	3.1035060502377796	5776	0	5100	1	alpha
TBCA_HUMAN	67	4.256776483733039	-8.2713740508437	0.2912870972295143	0.8347484323882179	0.64642421322611	1.3864626905007387	target	0	2	destabilized	0.32675567658847876	0.64642421322611	4.342645316143355	5788	0	5111	1	alpha
LRC40_HUMAN	42	4.33483649751294	-11.101663837301631	0.5401722723428165	0.7089600832630626	0.3713278958559902	1.381680378304178	target	0	2	destabilized	0.3233004238536297	0.2840479825990309	3.307267159336464	5821	0	5143	1	alpha
DLDH_HUMAN	52	3.942521976353493	5.493677039570149	0.4568154076909322	0.7387222422498346	1.5707697681711819	1.3814763382260824	target	2	0	stabilized	0.3231527376386237	3.0224319704662506	4.295724578958835	5822	0	5143	1	alpha
HAT1_HUMAN	47	3.8670689478948113	-6.466754693181495	0.6388183111970457	0.690153285860391	0.3187783054436269	1.3778031011035856	target	0	1	destabilized	0.32049027493911236	0.3187783054436269	3.8670689478948113	5846	0	5166	1	alpha
PDLI1_HUMAN	57	2.619620509509981	2.9926969587462795e-4	-0.6919931198654775	1.6910856806768104	1.5408543540638184	1.3711701309834508	target	1	0	stabilized	0.31566448550236853	1.5408543540638184	2.619620509509981	5899	0	5218	1	alpha
SYTC_HUMAN	52	3.5136161950051896	-6.885171028550908	0.3527396862619996	0.8226368079752071	0.6338020631685517	1.3687248348874115	target	0	1	destabilized	0.31387952894327475	0.6338020631685517	3.5136161950051896	5919	0	5237	1	alpha
IDHP_HUMAN	42	3.975689409253537	6.2009695015940105	0.5506922499388067	0.7208330413582038	1.610936837067135	1.2949667710734467	target	2	0	stabilized	0.31104288638965477	2.291661592576965	3.2287956497442365	5955	0	5272	1	alpha
CAH2_HUMAN	67	4.08651245678861	8.631728902724289	0.46876463653845	0.7594835914155468	1.5852307977371722	1.3644396365864822	target	2	0	stabilized	0.3107438217021665	2.802828167972433	4.288613787103605	5959	0	5275	1	alpha
RL12_HUMAN	67	3.421327260772206	6.656389365590883	0.7873895296096219	0.5731764390116209	1.7340937625632187	1.3628029728035247	target	5	0	stabilized	0.30954358819613487	2.523877565349022	3.789349417514851	5975	0	5290	1	alpha
SRSF9_HUMAN	42	1.2506246542893558	1.6105801712505043e-4	-2.049901522271364	3.068203613362777	2.8407624172142993	1.3600559229474385	target	1	0	stabilized	0.30752581871685725	2.8407624172142993	1.2506246542893558	5990	0	5304	1	alpha
HSP72_HUMAN	52	3.669397746782906	6.034247225186775e-4	-2.0550485258290645	3.122856700025711	3.197990267381269	1.326701326061162	target	5	0	stabilized	0.30654614712718065	4.8139818339854665	2.194983843080608	6003	0	5316	1	alpha
RS2_HUMAN	42	3.456507693589827	-5.447074949194863	0.7887978502935065	0.6387727502203591	0.266994779688591	1.3560054284902918	target	0	2	destabilized	0.30454319282161524	0.266994779688591	3.456507693589827	6034	0	5346	1	alpha
DC1L2_HUMAN	47	2.9942697200997337	-6.634215726903554e-4	-1.1010749510551592	1.002851711885156	0.29694598857188653	1.3517816290910145	target	1	2	destabilized	0.30142344763099005	0.29694598857188653	2.9942697200997337	6061	0	5372	1	alpha
FKB1A_HUMAN	57	3.4633590555637874	6.99159734264439	0.8877473380789214	0.46027832767166216	2.0752907297427967	1.3485455012648417	target	3	0	stabilized	0.29902660516027585	2.3611918074469727	4.47286784728891	6087	0	5397	1	alpha
RANDOM19005	47	-1.5156658631175917	4.375961971839194e-6	-2.2608429244939625	3.26260191235961	2.959916587441988	1.347660462996018	target	2	0	stabilized	0.29837009871207204	3.12965775044574	1.2918195660667398	6097	0	5406	1	alpha
RANDOM5399	67	2.791041109554529	-1.5761454564928187e-4	-0.5678660760899605	1.022221845454921	0.6189500682520698	1.3464254841468835	target	1	2	destabilized	0.2974532913348256	0.6189500682520698	2.9582292075688237	6108	0	5416	1	alpha
BRD2_HUMAN	42	3.3146751053393806	5.356303896374041e-4	-1.045655494271223	2.0503193338331607	1.923159007834988	1.3461581451571427	target	1	0	stabilized	0.29725471700813827	1.923159007834988	3.3146751053393806	6112	0	5419	1	alpha
ACDSB_HUMAN	62	2.9919057318941396	4.573842814940495e-4	-2.128108813955186	3.1398179243323816	2.920912062565004	1.3447484290533431	target	3	0	stabilized	0.2962069539633142	2.920912062565004	4.302751767813126	6126	0	5432	1	alpha
HINT2_HUMAN	52	4.350076097946889	12.052875463757795	0.7060951630702519	0.4312575974901678	1.9063118419868146	1.3416005447153285	target	2	1	stabilized	0.2938633375459571	2.163895796314564	4.350076097946889	6160	0	5465	1	alpha
EIF3L_HUMAN	52	3.4724821626391265	-8.176955086447158	0.43473103414463043	0.7684038217480218	0.5181748474886025	1.3400606427608721	target	0	1	destabilized	0.2927148687305032	0.5181748474886025	3.4724821626391265	6170	0	5474	1	alpha
GLRX5_HUMAN	47	4.0854352880844464	7.980286739807746	0.49054769303865875	0.763557394783021	1.519620767259062	1.3381773741755705	target	2	1	stabilized	0.2913085195682635	2.8152465833396954	4.0854352880844464	6190	0	5493	1	alpha
EXOS7_HUMAN	57	4.0523713288938525	7.342640663249208	0.6115036627520748	0.6728006472619109	1.6856757620059037	1.3309167044305947	target	4	0	stabilized	0.28586795626054623	3.0035598218270683	4.362375846736607	6254	0	5556	1	alpha
KCY_HUMAN	62	2.03267738378624	-1.2484413753725688e-4	-0.473912462212826	1.0175900859790665	0.5723023683350204	1.3298368385842452	target	0	3	destabilized	0.2850562569519243	0.5143220438751454	3.8907169840131592	6266	0	5567	1	alpha
S23IP_HUMAN	47	3.4741758428688856	-9.118447686519938	0.39362535567689294	0.7777940038339868	0.604975710850223	1.3217122487301223	target	0	1	destabilized	0.2789280541443883	0.604975710850223	3.4741758428688856	6349	0	5649	1	alpha
STRAP_HUMAN	62	0.532407111204193	0.0727288412441346	-2.744268281919808	3.746668040838257	2.5114767118924606	1.3213241255576074	target	1	0	stabilized	0.27863435922661833	2.5114767118924606	0.532407111204193	6350	0	5649	1	alpha
LYAG_HUMAN	62	4.623632328389533	-7.234230950980742	-0.39131911704669375	1.003038626869786	0.21414779257262262	1.3193457700476128	target	0	1	destabilized	0.2771359849819427	0.21414779257262262	4.623632328389533	6380	0	5678	1	alpha
HMCS1_HUMAN	47	2.255753561457119	0.10845759468964326	-1.06566601725898	2.066825887446703	1.6824094302858354	1.3188891369237041	target	3	0	stabilized	0.27678981934880525	4.243864200006633	2.255753561457119	6382	0	5679	1	alpha
LMNA_HUMAN	47	1.7670331046879457	4.756949667746145e-4	-2.2700577683785204	3.32166316329768	2.721625994808817	1.315793101210406	target	5	0	stabilized	0.2744396026178686	3.5772830066264016	1.7670331046879457	6413	0	5709	1	alpha
DCD_HUMAN	67	3.4061444512744323	-7.7421691369670285	0.49108453369785	0.8041715667992011	0.5336351854183619	1.312023415909249	target	0	1	destabilized	0.27157053785443835	0.5336351854183619	3.4061444512744323	6450	0	5745	1	alpha
IPO9_HUMAN	52	3.797266791189834	-4.5311356073423525e-4	-0.6999424972715862	1.0047001612816364	0.36991902061535953	1.3097788570236097	target	0	2	destabilized	0.2698583115304476	0.36991902061535953	3.228316128254397	6473	0	5767	1	alpha
IF6_HUMAN	57	3.4811415761068663	8.75608105159411	0.5587109225089377	0.7679334308786792	1.5880773234621972	1.3068899538016492	target	4	0	stabilized	0.267650233546889	2.3038358379661457	3.559177740321859	6497	0	5790	1	alpha
TALDO_HUMAN	67	2.9385755215781444	-2.590382229468707e-4	-0.431299474860513	1.0067760702690407	0.6665854561937157	1.3062108409242672	target	0	1	destabilized	0.2671304580418322	0.6665854561937157	2.9385755215781444	6503	0	5795	1	alpha
PLOD1_HUMAN	67	4.021122619153814	7.981083797740688	0.6466816510942245	0.6526195326906682	1.7802008732144996	1.304485533145709	target	2	1	stabilized	0.2658087355720244	1.9554345924150742	4.289788185545715	6524	0	5815	1	alpha
SEPT9_HUMAN	62	2.6173926273242123	-7.030018436068205e-4	-0.8497176040534477	1.0072346947799147	0.3492345822386098	1.3014170481043004	target	0	1	destabilized	0.2634537078118324	0.3492345822386098	2.6173926273242123	6549	0	5839	1	alpha
RANDOM14879	47	3.424221380888786	7.1962420265095695	0.6248353640871149	0.5490242498437932	1.507659268484662	1.2965531818148262	target	4	0	stabilized	0.2597093446808162	4.30175493070609	3.424221380888786	6600	0	5889	1	alpha
SEPT2_HUMAN	52	-0.6214892557978648	-9.008863364790049e-5	-0.41273917509893243	1.0005307141978053	0.6508844782450404	1.2950100689834	target	0	4	destabilized	0.2585184703980306	0.4687786240127925	3.1222841170101994	6616	0	5904	1	alpha
RLA0_HUMAN	42	3.820383711629752	-5.576334657023804	0.42772180637537316	0.7923822468670019	0.5285911419096643	1.2940448574861991	target	0	2	destabilized	0.2577728612322697	0.5285911419096643	3.456709458613513	6621	0	5908	1	alpha
P5CR2_HUMAN	62	3.4052399446761377	-7.323000454797844	0.5606641346507315	0.863090707416954	0.3996998226815942	1.28876156945175	target	0	2	destabilized	0.2536817335748866	0.3996998226815942	3.4052399446761377	6670	0	5956	1	alpha
SYSC_HUMAN	42	3.026667915391696	-4.2894623181499264e-4	-0.5351221379236312	0.9972845784365986	0.563160684938429	1.2886852522858765	target	0	1	destabilized	0.25362251437761574	0.563160684938429	3.026667915391696	6672	0	5957	1	alpha
AIFM1_HUMAN	62	2.83526610575728	5.404638418524394e-4	-4.590543633427871	5.591884187550183	4.75336771299641	1.2886811677873453	target	6	0	stabilized	0.25361934486434873	4.890805313100363	3.3845846264966313	6673	0	5957	1	alpha
ECHM_HUMAN	52	4.059545781974042	8.993380537026612	0.7632199503987962	0.6516430597513163	1.9570173511422826	1.286960258954839	target	2	0	stabilized	0.25228304931426004	2.0444190902832875	3.9703158308741386	6686	0	5969	1	alpha
RS4X_HUMAN	42	3.5696164343297814	-10.48979728240212	0.773928156461248	0.5713375872009393	0.1658887957457845	1.2843134761586463	target	0	2	destabilized	0.2502243157808458	0.1658887957457845	3.5696164343297814	6713	0	5995	1	alpha
RBM39_HUMAN	42	4.181565804664837	8.383451793861497	0.36224998535760145	0.8500051904266709	1.5493423694909578	1.2821535326335223	target	2	0	stabilized	0.24854111157234987	1.7816148039873128	4.181565804664837	6734	0	6015	1	alpha
HEXB_HUMAN	67	3.479326485375125	-1.5504917555914043e-4	-0.5831581650527496	1.010252437487913	0.6060852958777706	1.2799681787408275	target	0	1	destabilized	0.24683521726377342	0.6060852958777706	3.479326485375125	6741	0	6021	1	alpha
ETFA_HUMAN	62	3.4290755436702764	2.8944193880435336e-4	-1.446337984579383	2.601974757361104	2.6882506440661382	1.2762916172388163	target	2	0	stabilized	0.24395869896708716	2.6882506440661382	4.353567463184832	6771	0	6050	1	alpha
PDCD4_HUMAN	42	1.7989542235887255	-1.6364535319902617e-4	-0.8375885606046011	0.9961071859519187	0.32419725887260203	1.2754486772509666	target	0	1	destabilized	0.2432980204330438	0.32419725887260203	1.7989542235887255	6778	0	6056	1	alpha
FA50A_HUMAN	57	2.2900562779622535	-0.0534179786273465	-0.7002718853628505	1.0037404427848746	0.529641424203848	1.2705033583895207	target	0	1	destabilized	0.2394131671350923	0.529641424203848	2.2900562779622535	6827	0	6104	1	alpha
XRCC5_HUMAN	67	3.468368139857155	7.9201090009936825	0.7360181894839852	0.41887908343993097	1.6702387152518683	1.268491033322256	target	4	2	stabilized	0.2378280313071518	2.948145454436995	4.21916935567787	6850	0	6126	1	alpha
PPME1_HUMAN	52	3.211743818880048	-2.6763821427643395e-4	-0.46450632948746695	0.9955480363852569	0.6156974751357414	1.2643196243657293	target	0	1	destabilized	0.23453413113704927	0.6156974751357414	3.211743818880048	6905	0	6180	1	alpha
DDX46_HUMAN	47	3.874755192422815	-5.1422157352256095	0.40254739099435133	0.849504926746697	0.6481021006806301	1.2641053445896215	target	0	1	destabilized	0.2343646344905189	0.6481021006806301	3.874755192422815	6909	0	6183	1	alpha
SETD3_HUMAN	67	5.091749934725301	8.443039269440084e-4	-2.984885349698819	4.067394621316843	3.4431734168590182	1.2641010948910398	target	1	0	stabilized	0.2343612726617415	3.4431734168590182	5.091749934725301	6910	0	6183	1	alpha
NACAM_HUMAN	67	4.335490389860114	-10.822512864798654	0.5224196421602275	0.73029261582435	0.31186106471228175	1.2638680900899397	target	0	2	destabilized	0.23417693117281493	0.31186106471228175	4.474527741341693	6913	0	6185	1	alpha
RS28_HUMAN	52	2.84544626125879	3.808338414353828e-4	-7.184815664674293	8.192048974016105	8.171053603458038	1.2629996962465881	target	3	0	stabilized	0.2334896028668114	8.171053603458038	3.70714748250681	6926	0	6197	1	alpha
IPP2_HUMAN	52	3.453565791172682	-8.035471039412398	0.42500799201707173	0.7772163781554959	0.5494238642349187	1.2605806494886223	target	0	7	destabilized	0.2315724477399817	0.04253675361547204	3.309000926320998	6955	0	6225	1	alpha
KIF3C_HUMAN	67	4.328319897422115	-9.622998221055232	0.528425536794826	0.8579821524131975	0.3735757338145737	1.2556040944113627	target	0	2	destabilized	0.22761680690051242	0.3735757338145737	4.1077240130502615	7019	0	6288	1	alpha
FUBP3_HUMAN	42	-0.02133515891264842	3.690357399437848e-5	-3.686496406507997	4.69441727943221	4.17513969003146	1.253764090519767	target	6	0	stabilized	0.2261502989305689	11.071819573726792	2.3248950615151194	7036	0	6304	1	alpha
CLIP1_HUMAN	62	2.8933970992530598	1.7245719748546282e-4	-1.0313707888747161	2.0263278373652382	1.7572466669990767	1.2522344260449174	target	4	0	stabilized	0.22492949640038587	2.5073701026582085	3.9951749428090553	7061	0	6328	1	alpha
ERCC6_HUMAN	57	4.123719644024218	-5.682918778442961	0.7321024689786442	0.95152078176299	0.19903900701808006	1.2522052254288092	target	1	2	destabilized	0.22490617731893595	0.19903900701808006	4.2993854762506105	7063	0	6329	1	alpha
RB39B_HUMAN	67	4.069073067702533	7.326464374741368	0.6137632446478976	0.7240324316595661	1.7716966173602735	1.2476589685604684	target	4	0	stabilized	0.22126897023285147	2.8553250117573703	4.309497551034968	7112	0	6377	1	alpha
CSN3_HUMAN	67	3.6145493250792	-11.31582251371144	0.4601639569886542	0.7777278816005009	0.5547108281668425	1.231789890303242	target	0	1	destabilized	0.20846830698208638	0.5547108281668425	3.6145493250792	7292	0	6556	1	alpha
CHSP1_HUMAN	42	4.084984299766098	-2.8081133457493195e-4	-0.7229739602316454	0.9810094974229838	0.3124451700641402	1.2316666123877038	target	0	4	destabilized	0.20836822166253113	0.22788825113790667	4.084984299766098	7295	0	6558	1	alpha
RANDOM18681	62	2.2212207596005635	3.8823415989707203e-4	-2.151407048714336	3.201838748720683	2.646977097936468	1.2284100651079228	target	3	0	stabilized	0.20572070322397012	3.350470261581935	4.178970314034428	7333	0	6595	1	alpha
PLIN3_HUMAN	57	3.7904009755245958	-4.5954307798076455	0.2880402113005526	0.905519796450254	0.61963565891421	1.2281987682896778	target	1	4	destabilized	0.20554868005455584	0.5108621579998643	2.507784533835732	7335	0	6596	1	alpha
WDR12_HUMAN	37	2.9309002955786734	-8.457384454148071e-4	-0.3377949786614593	0.7891634583461191	0.4899871730868344	1.2156401097193306	target	0	2	destabilized	0.1952707773365939	0.4899871730868344	2.9309002955786734	7482	0	6742	1	alpha
THIC_HUMAN	47	4.3155269404506615	-10.154556456030868	0.3734949391396971	0.767206139694891	0.49891374037576514	1.176168536603418	target	0	2	destabilized	0.1952437981836105	0.49891374037576514	4.3155269404506615	7483	0	6742	1	alpha
PFD1_HUMAN	52	3.024738684181459	1.4386985547174672e-4	-0.6498547658024385	1.657291724223731	1.564174360493755	1.2153044151040269	target	5	0	stabilized	0.1949945928214726	2.400839771149419	7.994291680846311	7490	0	6748	1	alpha
RL17_HUMAN	42	3.84277247468192	-6.677430130701435	0.76504913955944	0.5935711826613438	0.1644892626984288	1.2147901680288062	target	0	4	destabilized	0.1945713606670814	0.1644892626984288	3.84277247468192	7494	0	6751	1	alpha
FAM9C_HUMAN	47	4.335620042866395	-10.85172054344765	0.6836935513180389	0.6926285119676006	0.05995162028279221	1.2097253962609613	target	0	1	destabilized	0.19039338861380717	0.05995162028279221	4.335620042866395	7548	0	6804	1	alpha
RBM10_HUMAN	57	3.953169186531091	6.086257152490893	1.1655284893671662	0.28856700125344315	2.350408096345125	1.2053451565099815	target	7	0	stabilized	0.18676596286513467	3.0462084479741063	4.155270678128086	7606	0	6861	1	alpha
CASQ2_HUMAN	37	4.0110853724978695	7.968130485106268	0.5398533596363515	0.7270811942929516	1.617724114414819	1.2026059838629266	target	7	0	stabilized	0.1844908553825525	4.498827000291707	4.0110853724978695	7644	0	6898	1	alpha
RAB15_HUMAN	42	4.009780120302025	6.637896835931391	0.6733969337724125	0.6596587969679654	1.8288039599803654	1.1993768765538735	target	1	0	stabilized	0.1818021523883988	1.8288039599803654	4.009780120302025	7687	0	6940	1	alpha
FKBP7_HUMAN	62	3.2665469416380013	8.773192585027367e-4	-1.3348345683744862	2.3369132376439903	2.165947005286952	1.199358952484398	target	2	0	stabilized	0.18178720779195023	2.165947005286952	3.2665469416380013	7688	0	6940	1	alpha
HNRPF_HUMAN	62	4.336733015278944	15.293582013021545	0.8262763862362956	0.678110145429716	2.114567840897312	1.197606702425601	target	4	0	stabilized	0.18032515065538393	3.1011837894863032	0.79488965099031	7704	0	6955	1	alpha
RL27A_HUMAN	42	3.5214340336868735	-9.40749599349668	0.7387650213979096	0.5661962965060781	0.1708348075011949	1.1960000724478264	target	0	2	destabilized	0.1789827161035438	0.1708348075011949	3.5214340336868735	7723	0	6973	1	alpha
CISY_HUMAN	37	3.7917580772087187	0.0012145756730794325	-2.42745476690361	3.551783328257473	3.225177139496922	1.193674539484489	target	3	0	stabilized	0.17703639781749053	3.452087744617783	3.7917580772087187	7745	0	6994	1	alpha
ACO13_HUMAN	47	4.015876354569666	9.6194043831308509	0.8271041861464009	0.6157843762076095	1.8886841344738856	1.191664282123653	target	2	0	stabilized	0.17535088646074284	2.157483817239292	4.015876354569666	7778	0	7026	1	alpha
XPO5_HUMAN	42	3.4391686181215757	-7.971530643613922	0.3628728221380787	0.8005834498994976	0.6320959567820442	1.1907734982798273	target	0	1	destabilized	0.17460309452035075	0.6320959567820442	3.4391686181215757	7791	0	7038	1	alpha
UMPS_HUMAN	42	-0.7644884594870371	0.17218549444965803	-2.3578460002560533	3.3652273573688287	1.5173763812031495	1.1896728512155175	target	1	0	stabilized	0.17367835438245394	1.5173763812031495	-0.7644884594870371	7807	0	7053	1	alpha
HNRDL_HUMAN	62	4.044874173767353	8.615080048567767	1.129549379787241	0.4824900472238094	2.41562973991277	1.1868179929874527	target	7	0	stabilized	0.17127577024600502	5.473999894181419	4.00893047350997	7848	0	7093	1	alpha
BCLF1_HUMAN	62	4.287241191921555	11.020467803984275	0.5803083267406839	0.7635106342520244	1.8656270868341527	1.1853185702512923	target	3	0	stabilized	0.17001157411236392	1.8656270868341527	3.314838112247299	7871	0	7115	1	alpha
TXND5_HUMAN	42	-11.379059656419706	-3.0748522820570234e-5	-0.43705242798279	1.001319688261974	0.6450805767070971	1.182854824843032	target	0	1	destabilized	0.1679308596661696	0.6450805767070971	-11.379059656419706	7904	0	7147	1	alpha
FPPS_HUMAN	47	3.795221247888453	-0.0010912837052438756	-1.1370281786653387	1.1013860835394185	0.3662583224000617	1.1400406582839946	target	0	3	destabilized	0.16306807811618831	0.19244050000837945	3.795221247888453	7965	0	7207	1	alpha
ML12A_HUMAN	52	3.884924949594876	-6.721755707441584	0.4683573214281327	0.7850645045452154	0.5155450636070288	1.1746091686158153	target	2	3	destabilized	0.16093546981037846	0.4751313274000636	3.2988308202911374	7986	0	7227	1	alpha
SYSM_HUMAN	47	1.7937396714684664	1.0449667125521608e-4	-0.9899624682150999	1.9885802352929043	1.8052461370596296	1.1711432398700512	target	2	0	stabilized	0.15798039982482234	1.9442495130081168	3.3504515632188987	8036	0	7276	1	alpha
CTR9_HUMAN	62	3.6729648081266517	3.856258228952302	0.6299370646965579	0.6147249179741219	1.564796652900177	1.170630216121518	target	5	0	stabilized	0.15754225004955025	1.946451194764405	3.137579617713931	8043	0	7282	1	alpha
PP1RB_HUMAN	42	1.8854080273660971	1.6330076838881168e-4	-0.8179720105459729	1.8316651363501133	1.7180703286068841	1.16927219107434	target	3	0	stabilized	0.15638149633992576	1.979722045632237	1.8854080273660971	8061	0	7299	1	alpha
CLIC4_HUMAN	67	3.3744170848125803	6.096732458431515	0.7849531818639197	0.4865557117675001	1.754386772212132	1.168061640065023	target	2	0	stabilized	0.1553456570418084	2.164581072883205	4.047195994314394	8079	0	7316	1	alpha
VINC_HUMAN	42	2.926961113009412	-6.221681375957064e-4	-0.3863005265964935	1.0035765526264322	0.6406591263418449	1.166986837929928	target	0	1	destabilized	0.15442507468891153	0.6406591263418449	2.926961113009412	8091	0	7327	1	alpha
HNRH2_HUMAN	57	4.016100513800671	6.1021259097803195	1.062357256618876	0.3899471703836853	2.275040933565264	1.1655709093528779	target	2	0	stabilized	0.15321101792858915	2.275040933565264	4.016100513800671	8101	0	7336	1	alpha
PABP3_HUMAN	37	3.255677773437925	-7.235923727004064	1.0823205528244375	0.8639529955657811	0.6191956970108874	1.1615050699351257	target	0	2	destabilized	0.1497166382081465	0.6191956970108874	3.255677773437925	8161	0	7395	1	alpha
MA2B1_HUMAN	47	3.333097434625835	-7.318990224541772	0.622607765751535	0.7992027617562725	0.5847688873266269	1.136487764851736	target	0	4	destabilized	0.14788637553953804	0.3554054499302517	3.333097434625835	8195	0	7428	1	alpha
VATG1_HUMAN	62	2.700876870588276	2.4206572570014269e-4	-1.7669659123827377	2.779987624751067	2.7524176677778076	1.1525716690629078	target	2	0	stabilized	0.1419956796930946	2.7524176677778076	2.700876870588276	8287	0	7519	1	alpha
CUTA_HUMAN	42	-0.12178581817818897	6.45066442448796e-5	-1.5283663547317468	2.54867720208564	2.3542454486819295	1.1524764037729867	target	3	2	stabilized	0.14191302172938616	3.1411781839737882	3.8799630397037013	8288	0	7519	1	alpha
SPS1_HUMAN	67	4.196526279581085	-8.107608287434516	0.39491684993165543	0.7615536189262267	0.4810693549265742	1.1492837359004335	target	0	4	destabilized	0.1391389099833297	0.4686919286344634	3.3991191237037497	8331	0	7561	1	alpha
RENT1_HUMAN	62	7.187588317956206	0.228793652468363	1.387925404092392	0.12795337748028277	2.2906996022391284	1.1491624313095208	target	1	0	stabilized	0.13903335642044368	2.2906996022391284	7.187588317956206	8332	0	7561	1	alpha
SDHA_HUMAN	67	4.331060466805392	11.015220692884466	0.3675707220753306	0.8059136867521544	1.524414267589701	1.1490332614807859	target	7	0	stabilized	0.13892094664674498	3.6583270629537035	3.9794125592232414	8333	0	7561	1	alpha
ANM8_HUMAN	47	4.119060482207823	25.437846019174845	1.0666023707359227	0.31151055249623266	2.7890578115635	1.1489187292797602	target	2	1	stabilized	0.13882126466767755	2.931489713520376	4.119060482207823	8334	0	7561	1	alpha
FERM2_HUMAN	47	3.8399896209822497	-7.455565873945883	0.39241675954293487	0.8148429499236092	0.5894617927880067	1.1471280567998925	target	0	3	destabilized	0.1372614769022246	0.44304931277129933	3.4426871935098435	8364	0	7590	1	alpha
CCAR2_HUMAN	57	4.340769483240566	11.529516183150728	0.4849924881592863	0.7597182684120481	1.7360106333088987	1.1451448452305757	target	4	0	stabilized	0.1355311313902333	6.010213719063273	4.097840109547266	8389	0	7614	1	alpha
UBXN7_HUMAN	57	3.531288169207646	-7.282045560152529	0.2984453414367365	0.8949129461016758	0.5857910774779398	1.143783975262101	target	0	2	destabilized	0.13434204231359706	0.5736221754314554	3.433540040234289	8402	0	7626	1	alpha
ANXA2_HUMAN	62	4.282984882038902	11.261652246384452	0.3333710319776374	0.8718589988610038	1.5071865317531659	1.1433939429192448	target	2	1	stabilized	0.13400098240432057	1.546020238023801	4.282984882038902	8410	0	7633	1	alpha
CBX3_HUMAN	37	3.5456096929128242	0.0010693661039053468	-0.5268078416171345	1.5831652700752676	1.5361549593405777	1.1397187578970611	target	6	0	stabilized	0.13078152837099608	2.449814792324919	3.5456096929128242	8474	0	7696	1	alpha
RBM15_HUMAN	42	3.910081153739932	5.143107746616587	0.3911986187641323	0.7987103043289918	1.5314289290219862	1.136892846529098	target	1	0	stabilized	0.1282989680485987	1.5314289290219862	3.910081153739932	8511	0	7732	1	alpha
SMC2_HUMAN	42	3.754749881937723	-7.018713347145145	0.31296376386407654	0.8563697508598207	0.6289151634146796	1.1360267526983223	target	0	1	destabilized	0.12753686993215982	0.6289151634146796	3.754749881937723	8518	0	7738	1	alpha
CTBL1_HUMAN	47	4.0464014251081215	-5.913016787174125	0.2960841553126464	0.8631679001163594	0.5360445660179853	1.1316065397384356	target	0	2	destabilized	0.12363833962478944	0.49716885452637916	3.954163726955304	8594	0	7813	1	alpha
PLOD2_HUMAN	57	3.912803141121092	5.234454230080796	0.42787862308430147	0.7785218641030718	1.5213195629129088	1.130895187679261	target	3	0	stabilized	0.12300952058434933	1.5331418504823542	3.4780960788208453	8608	0	7826	1	alpha
CSTF1_HUMAN	37	3.6188082023674006	4.340061472694801e-4	-1.8558529552157135	2.8065887210611784	2.6786907100278423	1.1303733603938158	target	5	0	stabilized	0.12254798557989088	3.28611655305446	3.6188082023674006	8616	0	7833	1	alpha
SF3B1_HUMAN	42	3.063964084419397	-5.033789293334035e-4	-0.4650871652113543	1.0006801140461572	0.599644571967256	1.1292354121727644	target	0	3	destabilized	0.12154077731351484	0.24967181257409024	3.063964084419397	8638	0	7854	1	alpha
LAP2A_HUMAN	67	3.4565113412213	7.929831930667905	1.1421322457587193	0.4172450899957031	2.257119909798959	1.1250556553037607	target	4	0	stabilized	0.11783250581383568	3.571154296198926	1.9362490977818716	8699	0	7914	1	alpha
IMA1_HUMAN	57	1.9879777082337828	0.05430194848027739	-2.0180997205377103	3.0388901787982507	2.4047183160263663	1.1239679027673464	target	1	0	stabilized	0.11686519480695239	2.4047183160263663	1.9879777082337828	8722	0	7936	1	alpha
RACK1_HUMAN	62	3.005627922486561	7.475832487168227e-4	-2.1027822700955126	3.2290679827047053	3.047658350899802	1.1221507078814836	target	3	0	stabilized	0.11524711883026577	3.449301104045059	1.7789540537208866	8749	0	7962	1	alpha
LAMB1_HUMAN	57	3.2694238457565894	-7.487386665926986	1.6283147423183904	0.6788544105571628	0.3915712483043543	1.1194834397469013	target	0	5	destabilized	0.11286736440318072	0.20949138255559852	2.993439054600177	8789	0	8001	1	alpha
CLH2_HUMAN	52	3.4859547289351385	-9.783389834554114	0.889469322088551	0.5870114828777873	0.19536319789028073	1.116759669101513	target	0	1	destabilized	0.1104313394633477	0.19536319789028073	3.4859547289351385	8826	0	8037	1	alpha
MDHM_HUMAN	62	2.4178677999448857	0.046544049464344005	-1.2498874607425936	2.2515820117173275	1.9614205263275477	1.1144239207857207	target	1	0	stabilized	0.10833760842333015	1.9614205263275477	2.4178677999448857	8854	0	8064	1	alpha
RABL6_HUMAN	52	3.2779060366421606	-7.254899782836302	0.7893834496767367	0.8177415368107914	0.6215047674240349	1.113474185603478	target	0	1	destabilized	0.10748502433337627	0.6215047674240349	3.2779060366421606	8864	0	8073	1	alpha
FGFR2_HUMAN	62	2.282173093671962	3.0938024727369246e-4	-1.1323349650094092	2.1254150066519544	1.8749337834090465	1.1124792607217955	target	1	0	stabilized	0.1065910928366688	1.8749337834090465	2.282173093671962	8881	0	8089	1	alpha
TF2AY_HUMAN	52	2.9069121876452417	5.1590859489629e-4	-1.8106313946161428	2.8627129612779294	2.60992239805268	1.1118395866035606	target	1	0	stabilized	0.10601592877092487	2.60992239805268	2.9069121876452417	8894	0	8101	1	alpha
RL7A_HUMAN	42	3.57936790432344	-10.059403541953813	0.5490605815047526	0.6684412374358334	0.32966304975888866	1.111681470397999	target	0	4	destabilized	0.10587370731066	0.31391692670227045	3.421374736435077	8896	0	8102	1	alpha
PP4C_HUMAN	67	3.0499123389244764	-3.346174507665887e-4	-0.6434843286624181	1.0153036093304981	0.3796966097324978	1.1105478997684213	target	0	4	destabilized	0.10485349693713418	0.3796966097324978	4.058458802184238	8913	0	8118	1	alpha
PQBP1_HUMAN	57	3.290713595347682	5.783139720689509	1.1196974999717222	0.09926040725956199	1.5612479585746644	1.1100560033925608	target	5	0	stabilized	0.10441046755831897	3.0255994360547676	3.1779946070646483	8920	0	8124	1	alpha
PA2G4_HUMAN	62	4.334410052424825	11.46344206828702	0.3855273801357515	0.8509669214258775	1.5036090554447974	1.1080924954218232	target	1	0	stabilized	0.1026400644634464	1.5036090554447974	4.334410052424825	8951	0	8154	1	alpha
STK24_HUMAN	42	1.7841563561607012	-3.936383606265208e-4	-0.745770725876878	1.0361103489407673	0.4592230823056631	1.0967431145536364	target	0	2	destabilized	0.10045831854801332	0.29056921242469247	1.7841563561607012	8990	0	8192	1	alpha
CPSF5_HUMAN	42	3.3722544204767853	7.494564914570889	0.9944402592461489	0.5291225629844231	1.8280395500896482	1.067747446119133	target	5	0	stabilized	0.09328369084930305	2.1611684113002565	3.4024403896060567	9098	0	8299	1	alpha
AGM1_HUMAN	47	4.297850280478824	-10.257324142078527	0.5361512622423893	0.6949018607773466	0.3209266413018643	1.0977220948033666	target	0	2	destabilized	0.09323720977982691	0.1876253990970979	4.061100267204027	9099	0	8299	1	alpha
RHG35_HUMAN	57	2.6738955576446934	0.007018276692287349	-2.044073514769271	3.064154898301151	2.7750462459393175	1.0504650345363813	target	3	0	stabilized	0.09306834190035215	5.0541774877259815	4.036517984801618	9102	0	8301	1	alpha
DPYL3_HUMAN	42	4.332893679397026	-8.928332900287746	0.23731162668873473	0.8862520383427752	0.666128688656035	1.0910673216358846	target	0	2	destabilized	0.08715641130453924	0.43594403284195316	4.332893679397026	9191	0	8389	1	alpha
MAK_HUMAN	47	2.729983010173957	6.550023190875448e-4	-0.7176309839866479	1.7303108012431478	1.5345503709222625	1.0908676965659077	target	6	0	stabilized	0.08697343145512243	5.181273672295658	3.4639814752554243	9193	0	8390	1	alpha
SH3G1_HUMAN	47	3.2858943119987516	1.7795110040022273e-4	-1.2041350581955617	2.2105593130273364	2.249545089496462	1.0907370851446285	target	2	0	stabilized	0.0868536926073438	2.5087895797852156	3.2858943119987516	9197	0	8393	1	alpha
CASP8_HUMAN	42	3.3011975531284015	-2.1757527468300395e-4	-0.5195392901715852	0.9692238239332825	0.5249485323459941	1.0892773790955432	target	0	1	destabilized	0.08551452143102353	0.5249485323459941	3.3011975531284015	9218	0	8413	1	alpha
CSTOS_HUMAN	37	4.206880732523408	11.900835813791279	0.8283542891446645	0.7155052200174647	2.291535138313241	1.0888569190387751	target	4	0	stabilized	0.08512844784286067	3.2985788538117355	4.206880732523408	9225	0	8419	1	alpha
GPX1_HUMAN	67	3.3356967562619353	8.507141273304148	0.884544168737892	0.19024519452799804	1.555486759732669	1.0851657411467188	target	2	0	stabilized	0.08173273214354067	1.555486759732669	3.331497620700292	9288	0	8481	1	alpha
S2542_HUMAN	37	5.9939561621277395	0.18900378183597344	0.6447280198492868	0.4263646099191674	1.5021252219536787	1.0848505764115808	target	2	0	stabilized	0.08144225991547131	1.8321260024825157	5.9939561621277395	9289	0	8481	1	alpha
MTUS2_HUMAN	62	2.9986565923578956	1.5501266941550854e-4	-1.072770739144418	2.125404746176074	1.8389458702779715	1.0835649234119393	target	2	0	stabilized	0.08025646028399414	1.8389458702779715	2.9986565923578956	9311	0	8502	1	alpha
G3BP1_HUMAN	42	3.3133047025836246	3.1930226760235205e-4	-0.632435323638922	1.6388254216432832	1.5515370712790306	1.0827079657204401	target	3	0	stabilized	0.0794652785815404	2.3235818385996123	3.3133047025836246	9328	0	8518	1	alpha
CCD73_HUMAN	37	-4.201071634727251	1.0717857376834086e-5	-1.3574242980241231	2.3599224660532014	2.2621896812445406	1.0818829000590842	target	4	0	stabilized	0.0787029491137813	2.2621896812445406	3.7221101901187885	9342	0	8531	1	alpha
ENAH_HUMAN	57	3.443464886515426	5.728888648824097e-4	-1.4591072380577	2.4879342002395504	2.508481889690215	1.0797485945745866	target	2	1	stabilized	0.07672823123669793	2.6982757906650496	3.443464886515426	9373	0	8561	1	alpha
LPPRC_HUMAN	37	3.1510828400208566	8.256635162483273e-4	-1.3737972723452236	2.4301184729018246	2.2087667770697936	1.0739010523978112	target	2	0	stabilized	0.07129786185902932	2.2087667770697936	3.1510828400208566	9458	0	8645	1	alpha
DNPEP_HUMAN	37	3.092306599977597	-5.678037485032093e-4	-0.4942979609942252	1.000151147527983	0.5130531368982072	1.072876531418291	target	0	4	destabilized	0.07034338845198097	0.4487565021050299	3.092306599977597	9478	0	8664	1	alpha
SDF2L_HUMAN	52	3.5007412990579976	1.4860037823348583e-4	-2.8111751229201283	3.8259359757390703	3.766328075835359	1.0716173047034174	target	2	1	stabilized	0.06916900703069873	3.766328075835359	3.538196043352147	9500	0	8685	1	alpha
NEMO_HUMAN	42	3.0385201364496304	-7.447442783994298e-4	-0.5145389578626558	1.0055711050638003	0.559955730158563	1.0712456054982076	target	0	1	destabilized	0.06882208870272899	0.559955730158563	3.0385201364496304	9502	0	8686	1	alpha
MATR3_HUMAN	52	4.085149696541563	-6.70512839752754	0.33938020053223916	0.8150492393636629	0.6133646077004525	1.0702509574912829	target	0	1	destabilized	0.0678931606851558	0.6133646077004525	4.085149696541563	9511	0	8694	1	alpha
K1C15_HUMAN	42	3.5067645168198722	8.19023716862875e-4	-0.7410920246891748	1.7362945574960222	1.7528008411584	1.0701424278256477	target	1	0	stabilized	0.067791749732877	1.7528008411584	3.5067645168198722	9514	0	8696	1	alpha
CBX1_HUMAN	62	3.0421554433364904	8.992158843758789e-4	-1.912834630799073	2.961924560051384	2.6699256118142882	1.0664913998284107	target	5	0	stabilized	0.06437419497590201	3.084108724132194	3.4531721299092215	9572	0	8753	1	alpha
[truncated: 891 more rows]
